# Supplementary material
Source: publisher figshare collection journal article supplement (https://geolsoc.figshare.com/ndownloader/files/35671070)
Supplement: Supplementary file 1 [file 35671070]

## Sheet: Table S1
Table S1. Quantitative mineralogy (wt%) of 10-63 µm fraction (pressed powder) by XRD analyses using Rietveld refinement (TOPAS software, Bruker AXS, Inc.).
Sample No.	Qtz	Ill 2M1	Ill 1M	Sud	Chl	Kln	ML	Tm	Cal	Sd	Cdl	Hem	Crd 10%	GoF
17PUA056 10-63µm	13	33		52						tr	2	1		3.19
17PUA056 10-63µm*	14	31		41				tr		tr	3	1	10	2.75
17PUA072 10-63µm	34	21	22		23									3.32
17PUA072 10-63µm*	32	14	22		23								9	2.49
17PUA075 10-63µm	tr	47		35		3				15				3.25
17PUA075 10-63µm*	tr	43		29		2			tr	15			11	2.76
17PUA076 10-63µm	27	49		21			tr		tr	tr	2	1		4.01
17PUA076 10-63µm*	29	41		16			tr		tr	tr	3	1	10	3.89
17PUA097 10-63µm	27	18		55							tr			4.09
17PUA097 10-63µm*	29	15		46							tr		10	3.18
Qtz: quartz; Ill: illite+ polytypes, Sud: sudoite; Chl: chlorite; Kln: kaolinite; ML: mixed-layer clay mineral; Tm: tourmaline;
Cal: calcite; Sd: siderite; Cdl: crandallite; Hem: hematite; Crd: corundum; Gof: goodness of fit
*5 hours run, 10% corundum added

## Sheet: Table S2
Table S2. Semi-quantitative mineralogy (wt%) of silt and clay-size fractions (smears) by XRD analyses by estimation using EVA (RIR method) combined with TOPAS software (Bruker AXS, Inc.).
Sample No.	Qtz	Ill	Sud	Chl	Kln	Tm	Sd	Cdl	Comments
17PUA056 10-63µm	28	31	39			1		1
17PUA056 6-10µm	14	30	53			2		1
17PUA056 2-6µm	5	27	63			4		1
17PUA056 -2µm		30	67			3
17PUA072 10-63µm	43	41		15					Illite mix of 2M1 and 1M (12/29)
17PUA072 6-10µm	13	58		30					Illite mix of 2M1 and 1M (10/48)
17PUA072 2-6µm	10	61		29					Illite mix of 2M1 and 1M (3/58)
17PUA072 -2µm		60		40					Could only resolve with IM type
17PUA075 10-63µm		51	31		tr		18
17PUA075 6-10µm		62	33		tr		5
17PUA075 2-6µm		60	38				2
17PUA075 -2µm		48	52
17PUA076 10-63µm	37	47	15					1
17PUA076 6-10µm	18	58	15					9
17PUA076 2-6µm	13	62	15					10
17PUA076 -2µm		89	11					tr
17PUA097 10-63µm	38	22	40					2
17PUA097 6-10µm	17	24	59
17PUA097 2-6µm	8	27	65
17PUA097 -2µm		42	58
Qtz: quartz; Ill: illite, Sud: sudoite; Chl: chlorite; Kln: kaolinite; Tm: tourmaline; Sd: siderite; Cdl: crandallite

## Sheet: Table S3
Table S3. Comparison of clay minerals identified from VNIR-SWIR spectra using the Halo and TSG libraries, with those identified via XRD analysis. Star (*) rating is degree of confidence.
DDH	Sample	Depth (m)		Mineralogy
		Drill core (Halo, TSG)	Rock powder (XRD)	HALO	TSG	XRD
PLS14-175	18PUA036	140, 143	141	Beidellite1(3*), FeMg-chlorite (2*), cookeite2 (2*), K-illite (3*), palygorskite (1*)	Montmorillonite, paragonite, muscovitic-illite	Muscovite/illite, chlorite, anatase, jarosite, tourmaline (trace), pyrite (trace)
AR-16-178-c1	18PUA117	99	98.93 - 99	KaolinitePX3 (3*), tourmaline (3*)	KaoliniteWX, Fe-tourmaline	Kaolinite (trace), hematite (trace)
AR-16-178-c1	18PUA119	120	120.88-120.96	KaoliniteWX4 (3*), K-illite (3*)	Muscovite, kaoliniteWX	Muscovite/illite, kaolinite, anatase (trace)
AR-16-178-c1	18PUA123	199	198.9 - 199	Hematite (3*), muscovite (3*), tourmaline (2*), Mg-illite (3*)	Muscovite	Muscovite/illite, kaolinite, hematite, anatase
AR-16-178-c1	18PUA125	273, 277	275.9 - 276	Muscovite (3*), rectorite (2*), FeMg-chlorite (3*), biotite (3*), tourmaline (2*)	Muscovite, FeMg-chlorite	Muscovite, chlorite
AR-16-178-c1	18PUA131	401	401.3 - 401.38	Muscovite (3*), rectorite (3*), cookeite (2*)	Muscovite	Muscovite/illite, kaolinite, calcite, chlorite (trace), hematite (trace)
AR-16-178-c1	18PUA146	457	457.5 - 458.5	Gypsum (2*), kaoliniteWX (3*), muscovite (3*)	KaoliniteWX, muscovite	Muscovite/illite, kaolinite, chlorite, anatase (trace)
AR-16-178-c1	18PUA148	471	471.5 - 472	Muscovite (3*), FeMg-chlorite (2*), cookeite (3*), Mg-illite (1*)	Muscovite, Mg-chlorite	Muscovite/illite, sudoite, calcite, hematite
AR-16-178-c1	18PUA153	491	490.85 - 490.95	Muscovite (3*), Mg-illite (3*)	Muscovite	Muscovite/illite, tourmaline, sudoite
AR-16-178-c1	18PUA156	557	557.2 - 557.26	Muscovite (3*), tourmaline (2*), FeMg-chlorite (1*)	Muscovite, Fe-tourmaline	Muscovite/illite, chlorite, calcite (trace), hematite (trace)
1XRD analyses indicate that smectite-group minerals identified by the Halo are likely a mixture of illite-chlorite (sudoite) and a mixed-layer clay mineral
2Cookeite is the only di-trioctahedral chlorite in the Halo reference library and this is more likely sudoite
3PX indicates poorly crystaline
4WX indicates well-crystallized
XRD-minerals in order of abundance

## Sheet: Table S4
Table S4. VNIR-SWIR reflectance spectra of reference minerals from the Athabasca Basin Mineral Standards database
Wavelength (nm)	Illite	Sudoite	Kaolinite	Dickite	Magnesiofoitite
350	0.340248	0.260427	0.199779	0.272785	0.388058
351	0.343248	0.263028	0.202304	0.277638	0.394175
352	0.347438	0.263958	0.201669	0.280869	0.393826
353	0.343809	0.260963	0.199124	0.275127	0.38671
354	0.349038	0.269284	0.202543	0.277614	0.390229
355	0.353181	0.275663	0.205958	0.281261	0.395698
356	0.340921	0.25938	0.200654	0.276508	0.391766
357	0.337268	0.262355	0.19983	0.275926	0.39361
358	0.33912	0.26741	0.203408	0.275642	0.397457
359	0.346389	0.267862	0.212314	0.274113	0.402177
360	0.350964	0.268745	0.217842	0.282193	0.408584
361	0.348974	0.267871	0.217174	0.281637	0.409249
362	0.341551	0.265545	0.210957	0.272985	0.404764
363	0.344442	0.267215	0.207183	0.277211	0.407452
364	0.344128	0.265599	0.207582	0.279962	0.408234
365	0.34187	0.263303	0.210202	0.280837	0.407693
366	0.338752	0.265255	0.212693	0.277679	0.406078
367	0.3457	0.26982	0.217226	0.278902	0.408434
368	0.350108	0.272381	0.219464	0.279754	0.408683
369	0.344147	0.269728	0.216254	0.277472	0.402739
370	0.343227	0.269634	0.216199	0.276707	0.405254
371	0.345218	0.271912	0.21774	0.27855	0.409495
372	0.349392	0.276118	0.220455	0.282714	0.41412
373	0.346776	0.273802	0.220521	0.280574	0.409323
374	0.345035	0.274098	0.220392	0.280785	0.408099
375	0.345133	0.276369	0.221341	0.28253	0.409763
376	0.351522	0.280223	0.228192	0.284511	0.414498
377	0.351654	0.280578	0.229593	0.284265	0.415551
378	0.349756	0.279427	0.228265	0.282946	0.415169
379	0.348039	0.277554	0.224974	0.280894	0.414375
380	0.350601	0.281602	0.22971	0.284419	0.417028
381	0.351827	0.283853	0.231894	0.28579	0.418197
382	0.350723	0.282938	0.229653	0.283641	0.417011
383	0.355127	0.287198	0.234341	0.287683	0.422129
384	0.357222	0.287658	0.235558	0.288673	0.422157
385	0.357563	0.286108	0.234628	0.287662	0.419549
386	0.357182	0.288541	0.235518	0.287537	0.422551
387	0.359157	0.292422	0.237755	0.288424	0.424572
388	0.361627	0.29517	0.239962	0.289062	0.425693
389	0.362998	0.293619	0.240776	0.288025	0.425591
390	0.362613	0.293943	0.23967	0.288442	0.424304
391	0.363358	0.295636	0.240335	0.289859	0.424622
392	0.36612	0.298739	0.243936	0.292286	0.427451
393	0.366673	0.299283	0.244968	0.29278	0.428455
394	0.367284	0.299995	0.245126	0.292903	0.429254
395	0.368114	0.300909	0.24494	0.292859	0.429893
396	0.369968	0.301763	0.247187	0.293425	0.430027
397	0.37175	0.304062	0.249606	0.294966	0.430795
398	0.373148	0.306536	0.251563	0.296429	0.431921
399	0.373581	0.307671	0.252012	0.296376	0.433312
400	0.374924	0.309043	0.253946	0.29722	0.433397
401	0.376396	0.310168	0.255553	0.29783	0.433741
402	0.37776	0.310846	0.256115	0.297736	0.435023
403	0.377795	0.311158	0.256249	0.297622	0.435063
404	0.378344	0.311891	0.256768	0.297816	0.434913
405	0.37951	0.313068	0.257756	0.29833	0.434776
406	0.381519	0.314738	0.260025	0.299385	0.436219
407	0.383272	0.316316	0.26158	0.300091	0.437352
408	0.384611	0.317531	0.26262	0.300518	0.438114
409	0.38493	0.317578	0.263195	0.30061	0.438109
410	0.386093	0.318493	0.264491	0.301098	0.438384
411	0.387309	0.319615	0.265828	0.301742	0.438819
412	0.388196	0.320674	0.266885	0.302481	0.439407
413	0.389023	0.322147	0.267934	0.302686	0.440304
414	0.390315	0.323553	0.269183	0.303319	0.44107
415	0.392085	0.324822	0.270617	0.304447	0.441643
416	0.39284	0.325365	0.27098	0.304747	0.441651
417	0.39366	0.326124	0.272064	0.304924	0.441856
418	0.394527	0.327027	0.273494	0.305078	0.442122
419	0.395464	0.32803	0.274477	0.305505	0.442097
420	0.396603	0.328881	0.2754	0.305634	0.442041
421	0.398073	0.32997	0.276555	0.306124	0.442508
422	0.400153	0.331726	0.278294	0.307653	0.444162
423	0.40105	0.332661	0.279025	0.307714	0.444318
424	0.402221	0.333576	0.279792	0.308127	0.444454
425	0.403975	0.334633	0.280807	0.30927	0.444861
426	0.405284	0.335281	0.281418	0.30943	0.444998
427	0.406833	0.33651	0.282356	0.310089	0.445483
428	0.408537	0.338068	0.283517	0.311023	0.446141
429	0.410137	0.338996	0.284567	0.311345	0.446253
430	0.412077	0.340139	0.285569	0.311979	0.446927
431	0.414053	0.341477	0.286564	0.312733	0.447698
432	0.415785	0.343133	0.287618	0.313476	0.448111
433	0.417499	0.344405	0.28847	0.314345	0.448654
434	0.419037	0.34549	0.28918	0.314893	0.448905
435	0.420336	0.346421	0.289748	0.314942	0.448698
436	0.422766	0.34818	0.290717	0.315925	0.449654
437	0.424969	0.349895	0.292037	0.317039	0.450482
438	0.426872	0.351455	0.293531	0.318112	0.451144
439	0.428213	0.352239	0.294048	0.318134	0.451671
440	0.429676	0.353359	0.294677	0.318795	0.451876
441	0.431172	0.354592	0.295441	0.319665	0.452039
442	0.432612	0.355669	0.296481	0.320196	0.452591
443	0.434006	0.356682	0.297256	0.320718	0.453251
444	0.435405	0.357749	0.298088	0.321292	0.453836
445	0.43684	0.358945	0.299137	0.321965	0.454248
446	0.437689	0.359751	0.300089	0.322268	0.454461
447	0.438527	0.360548	0.300873	0.322783	0.454682
448	0.439416	0.361377	0.30153	0.323514	0.454949
449	0.44059	0.362395	0.302619	0.323996	0.455594
450	0.441151	0.363376	0.303398	0.32436	0.456106
451	0.441374	0.364143	0.304083	0.324649	0.456457
452	0.441645	0.364169	0.305107	0.324909	0.456478
453	0.442051	0.364609	0.306116	0.325201	0.45683
454	0.442403	0.365088	0.307049	0.325503	0.457074
455	0.442573	0.365397	0.307854	0.325811	0.456909
456	0.442697	0.365922	0.308744	0.325968	0.457419
457	0.44279	0.366494	0.309605	0.326184	0.45783
458	0.44286	0.367072	0.310424	0.326476	0.45804
459	0.443078	0.367101	0.311294	0.326575	0.457983
460	0.443156	0.367333	0.312225	0.326786	0.458077
461	0.443198	0.367708	0.313217	0.327075	0.458285
462	0.443516	0.368152	0.314349	0.327395	0.458582
463	0.443568	0.368376	0.31509	0.327466	0.458715
464	0.443444	0.368478	0.315705	0.327422	0.458736
465	0.443139	0.36848	0.316363	0.327317	0.458637
466	0.443354	0.36892	0.317332	0.327732	0.458706
467	0.443569	0.36936	0.318237	0.328026	0.458905
468	0.443678	0.369717	0.319004	0.328063	0.459234
469	0.444005	0.369935	0.320054	0.328312	0.459401
470	0.444224	0.370271	0.321034	0.328548	0.459537
471	0.444376	0.370674	0.321941	0.328776	0.45964
472	0.444607	0.37096	0.322747	0.329014	0.459677
473	0.444792	0.371191	0.323527	0.32912	0.459849
474	0.445026	0.371457	0.324313	0.329234	0.460047
475	0.445449	0.371884	0.325166	0.329516	0.460167
476	0.445746	0.372287	0.326017	0.329733	0.46029
477	0.446073	0.372723	0.32683	0.329969	0.46048
478	0.446479	0.373219	0.327598	0.33025	0.460763
479	0.447317	0.373819	0.328675	0.33057	0.461124
480	0.447876	0.374265	0.329502	0.330896	0.461351
481	0.448193	0.374593	0.330128	0.331192	0.461454
482	0.448565	0.375062	0.330931	0.331192	0.461471
483	0.449307	0.375596	0.331863	0.331524	0.461832
484	0.450165	0.37619	0.332792	0.332023	0.462286
485	0.45084	0.37689	0.333536	0.33255	0.462506
486	0.451599	0.37742	0.33433	0.332933	0.462845
487	0.452422	0.37808	0.335133	0.333327	0.463242
488	0.453333	0.379038	0.335942	0.333802	0.463696
489	0.454207	0.379655	0.33676	0.334089	0.464091
490	0.455166	0.380318	0.337562	0.334441	0.46446
491	0.456203	0.381055	0.338359	0.334871	0.464814
492	0.457191	0.381903	0.339306	0.335391	0.465262
493	0.458242	0.382664	0.340162	0.335872	0.46574
494	0.459295	0.383387	0.340946	0.336325	0.466191
495	0.460246	0.384174	0.341673	0.33677	0.466487
496	0.461361	0.385067	0.342437	0.337228	0.466968
497	0.462603	0.385989	0.343244	0.33774	0.467507
498	0.46401	0.386919	0.344121	0.338356	0.468057
499	0.465176	0.387684	0.344995	0.338956	0.468657
500	0.466359	0.388504	0.345849	0.339534	0.469211
501	0.467599	0.389407	0.346682	0.340091	0.469717
502	0.46898	0.390371	0.347427	0.340557	0.470393
503	0.470231	0.391268	0.348227	0.341091	0.471011
504	0.471418	0.392123	0.349066	0.341642	0.471575
505	0.472742	0.393007	0.349961	0.342089	0.472075
506	0.474016	0.393925	0.350793	0.342597	0.472642
507	0.47524	0.394802	0.351561	0.343097	0.473212
508	0.476411	0.395574	0.35225	0.343541	0.473749
509	0.477775	0.396453	0.353078	0.344128	0.474374
510	0.479103	0.397392	0.353939	0.344726	0.474988
511	0.480352	0.398389	0.354816	0.345308	0.47557
512	0.481663	0.399186	0.355549	0.345793	0.476189
513	0.482985	0.400127	0.356412	0.346374	0.476878
514	0.4843	0.401141	0.357342	0.347006	0.477582
515	0.48554	0.401944	0.358088	0.34753	0.478071
516	0.486862	0.402892	0.358887	0.348066	0.478687
517	0.488204	0.403855	0.359716	0.348632	0.479347
518	0.489536	0.404718	0.360585	0.34928	0.480001
519	0.490755	0.405496	0.361298	0.349709	0.480574
520	0.492022	0.406331	0.36204	0.350196	0.481188
521	0.4934	0.407278	0.362876	0.350831	0.481889
522	0.494629	0.408153	0.363757	0.351418	0.482528
523	0.495874	0.40902	0.364599	0.351975	0.483133
524	0.497145	0.40988	0.3654	0.352518	0.483716
525	0.498472	0.410719	0.366136	0.353145	0.484364
526	0.499762	0.411601	0.366968	0.353772	0.484952
527	0.501033	0.412516	0.367826	0.354397	0.485556
528	0.502331	0.413491	0.368636	0.355024	0.486317
529	0.503549	0.414332	0.369418	0.355632	0.48693
530	0.50478	0.415194	0.370208	0.356267	0.487531
531	0.50608	0.416156	0.37103	0.356964	0.488182
532	0.507301	0.416994	0.371752	0.357622	0.488846
533	0.508523	0.417816	0.372534	0.358264	0.489485
534	0.509751	0.418632	0.373372	0.358899	0.490093
535	0.510962	0.419469	0.374098	0.359631	0.490606
536	0.512088	0.420327	0.374868	0.360299	0.491166
537	0.513183	0.421187	0.375654	0.36095	0.491753
538	0.514361	0.422024	0.376421	0.361686	0.492348
539	0.515514	0.422885	0.377184	0.362463	0.492929
540	0.516656	0.423758	0.377933	0.363271	0.493485
541	0.517796	0.424647	0.37866	0.364122	0.494008
542	0.518926	0.425653	0.379469	0.36493	0.494586
543	0.520039	0.426598	0.380279	0.365762	0.495161
544	0.521136	0.427463	0.381078	0.366628	0.495723
545	0.522267	0.428391	0.381837	0.367521	0.496251
546	0.52334	0.42925	0.382521	0.368386	0.496776
547	0.524391	0.430079	0.383184	0.369247	0.497297
548	0.52554	0.430992	0.383995	0.370188	0.497825
549	0.526577	0.431895	0.384701	0.371131	0.49833
550	0.527594	0.432801	0.38539	0.372085	0.498813
551	0.528669	0.433734	0.386132	0.373069	0.499268
552	0.529746	0.434684	0.386849	0.374082	0.499713
553	0.530844	0.435652	0.387582	0.375128	0.50018
554	0.53197	0.436641	0.388339	0.376213	0.500676
555	0.533065	0.437628	0.389079	0.377344	0.501151
556	0.534183	0.438625	0.389786	0.37848	0.501631
557	0.535312	0.439632	0.390469	0.379629	0.502102
558	0.536408	0.440664	0.391155	0.380846	0.502494
559	0.537597	0.441731	0.391881	0.382097	0.502936
560	0.538817	0.44284	0.39263	0.383361	0.503397
561	0.540021	0.444028	0.393405	0.384627	0.503858
562	0.541272	0.445108	0.394101	0.385879	0.504287
563	0.542494	0.446165	0.394765	0.387146	0.50469
564	0.543661	0.447222	0.395406	0.388443	0.505065
565	0.54499	0.448399	0.396134	0.389796	0.505527
566	0.546254	0.449546	0.396834	0.391134	0.505926
567	0.547464	0.450658	0.397509	0.392451	0.506272
568	0.548723	0.451718	0.398198	0.39372	0.506645
569	0.550071	0.452874	0.398906	0.395065	0.507033
570	0.551427	0.454033	0.399608	0.39643	0.50741
571	0.552676	0.455056	0.400264	0.397745	0.507723
572	0.553961	0.456157	0.400957	0.399109	0.508071
573	0.555246	0.457256	0.401661	0.400446	0.508389
574	0.556518	0.458322	0.402369	0.401721	0.50864
575	0.557818	0.4594	0.403039	0.403061	0.508959
576	0.559087	0.460415	0.403709	0.404354	0.509238
577	0.560327	0.461372	0.404387	0.405599	0.509478
578	0.561634	0.462376	0.405099	0.406888	0.5098
579	0.562866	0.463374	0.40581	0.408157	0.510084
580	0.564072	0.464369	0.406523	0.409403	0.510353
581	0.565344	0.465367	0.40724	0.410607	0.510653
582	0.566519	0.46632	0.408004	0.411786	0.510905
583	0.567653	0.467221	0.408741	0.412927	0.511135
584	0.568766	0.468046	0.409396	0.414009	0.511351
585	0.569828	0.468873	0.410112	0.415038	0.511507
586	0.570855	0.469668	0.410824	0.416024	0.511674
587	0.571851	0.470429	0.411524	0.416971	0.511862
588	0.572903	0.471284	0.412267	0.417989	0.512091
589	0.573832	0.472044	0.413001	0.418905	0.512261
590	0.574672	0.472746	0.413731	0.419753	0.512397
591	0.575479	0.473472	0.414474	0.420607	0.51256
592	0.576317	0.474178	0.415228	0.421409	0.512702
593	0.577118	0.474888	0.415995	0.422199	0.512822
594	0.577808	0.475626	0.416781	0.423008	0.51291
595	0.57851	0.476296	0.417545	0.423663	0.513043
596	0.5792	0.476938	0.418303	0.424295	0.513161
597	0.579873	0.477556	0.419059	0.424926	0.51325
598	0.580488	0.478196	0.419837	0.425571	0.513314
599	0.581055	0.478766	0.420623	0.426179	0.513389
600	0.581591	0.479279	0.421404	0.426749	0.513469
601	0.582165	0.479771	0.422119	0.427253	0.51352
602	0.582691	0.480192	0.422853	0.427782	0.513621
603	0.583184	0.480568	0.423591	0.428293	0.513715
604	0.583646	0.4809	0.42432	0.428725	0.513731
605	0.584055	0.481199	0.425066	0.429137	0.513829
606	0.584468	0.481431	0.425813	0.42954	0.513898
607	0.584903	0.481572	0.426557	0.429935	0.513898
608	0.585271	0.48175	0.427273	0.430308	0.513871
609	0.585678	0.481929	0.428005	0.430673	0.513866
610	0.586113	0.482111	0.428749	0.431024	0.513874
611	0.58647	0.482331	0.429473	0.431297	0.513822
612	0.586778	0.482507	0.430155	0.431621	0.513812
613	0.587052	0.482666	0.430819	0.431937	0.513833
614	0.58729	0.482846	0.431486	0.432145	0.513885
615	0.58743	0.483082	0.432156	0.432405	0.513912
616	0.587556	0.483386	0.432845	0.432668	0.513944
617	0.587699	0.483783	0.433568	0.432913	0.513994
618	0.587797	0.484075	0.434258	0.433104	0.514013
619	0.587911	0.48431	0.434931	0.4333	0.514033
620	0.588047	0.484504	0.435595	0.433511	0.514062
621	0.588228	0.484822	0.436341	0.433796	0.514136
622	0.588342	0.48497	0.437016	0.434039	0.514206
623	0.588452	0.485033	0.437675	0.434281	0.514279
624	0.588705	0.485152	0.438441	0.434619	0.51437
625	0.588953	0.485155	0.439201	0.43492	0.514422
626	0.589225	0.485091	0.439956	0.435199	0.514427
627	0.589545	0.484963	0.440707	0.43546	0.514359
628	0.589868	0.484801	0.441418	0.435712	0.514322
629	0.590235	0.484785	0.442181	0.435976	0.514256
630	0.59065	0.484936	0.443004	0.436252	0.514154
631	0.591017	0.485094	0.443813	0.436518	0.514074
632	0.591366	0.485272	0.444653	0.436798	0.513994
633	0.591686	0.485475	0.445503	0.437067	0.513902
634	0.591929	0.485743	0.446326	0.437256	0.513753
635	0.592118	0.485981	0.44711	0.437497	0.51366
636	0.592295	0.486218	0.447889	0.437738	0.513603
637	0.59249	0.48648	0.4487	0.437943	0.513582
638	0.592704	0.486782	0.449539	0.438114	0.513583
639	0.59285	0.487065	0.450337	0.438261	0.513559
640	0.592907	0.487317	0.451078	0.438386	0.513499
641	0.592941	0.487635	0.451875	0.438442	0.513507
642	0.59297	0.48798	0.452665	0.438505	0.51347
643	0.592996	0.488348	0.453439	0.438567	0.5134
644	0.593012	0.488761	0.454164	0.438588	0.513322
645	0.593107	0.4891	0.454987	0.438689	0.513273
646	0.593255	0.489417	0.455832	0.438818	0.513238
647	0.593464	0.489758	0.45665	0.438939	0.51321
648	0.593619	0.490046	0.457467	0.439019	0.513189
649	0.593762	0.490306	0.458275	0.439111	0.513153
650	0.593905	0.490542	0.459074	0.439232	0.513094
651	0.594095	0.490801	0.459913	0.439391	0.513075
652	0.594266	0.491034	0.460705	0.439555	0.513029
653	0.594432	0.491239	0.461471	0.439726	0.51297
654	0.594714	0.4914	0.46235	0.439938	0.513008
655	0.594968	0.491619	0.463233	0.440151	0.513021
656	0.595216	0.491849	0.464105	0.440372	0.513027
657	0.59549	0.492027	0.464944	0.440624	0.513047
658	0.595737	0.492268	0.465798	0.440854	0.513077
659	0.595994	0.492528	0.466665	0.441097	0.513116
660	0.596281	0.492795	0.467551	0.441372	0.513166
661	0.596576	0.493055	0.468419	0.441635	0.513219
662	0.596831	0.493287	0.469265	0.441866	0.513241
663	0.597055	0.493498	0.470095	0.442069	0.513236
664	0.597372	0.493791	0.470961	0.44233	0.51328
665	0.597656	0.494078	0.47181	0.442603	0.513316
666	0.597936	0.494359	0.472658	0.442878	0.513359
667	0.598277	0.494634	0.47355	0.443142	0.513448
668	0.59857	0.494908	0.474396	0.44339	0.513503
669	0.598859	0.495187	0.475244	0.443635	0.513549
670	0.599169	0.49548	0.476129	0.443886	0.513596
671	0.599554	0.495779	0.477026	0.444143	0.513713
672	0.599917	0.496095	0.477919	0.444427	0.513823
673	0.600244	0.496427	0.478803	0.444739	0.513917
674	0.600483	0.496669	0.479616	0.444953	0.513915
675	0.600818	0.49696	0.480475	0.445209	0.513972
676	0.601209	0.497275	0.481366	0.445491	0.514068
677	0.601571	0.49755	0.482278	0.445768	0.514168
678	0.6019	0.497847	0.483169	0.446067	0.514265
679	0.602221	0.498148	0.484045	0.44637	0.51436
680	0.602555	0.498447	0.484911	0.446664	0.514454
681	0.602938	0.498757	0.485809	0.446962	0.514556
682	0.603313	0.499069	0.486705	0.44726	0.514649
683	0.603669	0.499382	0.487595	0.447558	0.514729
684	0.60404	0.499689	0.488481	0.447883	0.514831
685	0.604418	0.499997	0.48938	0.448215	0.514938
686	0.60481	0.50031	0.490289	0.448553	0.515059
687	0.605264	0.50066	0.491213	0.448909	0.515259
688	0.605656	0.500977	0.492133	0.449249	0.515415
689	0.606011	0.501292	0.493023	0.449578	0.515531
690	0.606342	0.501639	0.493843	0.449897	0.515584
691	0.606734	0.501965	0.49476	0.450254	0.515724
692	0.607156	0.502289	0.495688	0.450609	0.51589
693	0.607607	0.502618	0.496609	0.450955	0.516072
694	0.608032	0.502953	0.497506	0.45123	0.516211
695	0.608455	0.503303	0.498403	0.45155	0.516358
696	0.608885	0.503666	0.499307	0.451913	0.516516
697	0.609366	0.504046	0.500264	0.452285	0.5167
698	0.609762	0.504407	0.501179	0.452606	0.516829
699	0.610125	0.504763	0.502079	0.452906	0.516941
700	0.610522	0.505128	0.502999	0.453211	0.517084
701	0.61096	0.505457	0.503928	0.453541	0.517256
702	0.61139	0.505784	0.504828	0.453881	0.517418
703	0.611793	0.506125	0.505676	0.454227	0.517552
704	0.612215	0.506492	0.506607	0.454564	0.5177
705	0.612641	0.506844	0.507516	0.454891	0.51785
706	0.613071	0.507182	0.508403	0.455213	0.518005
707	0.61352	0.507567	0.509364	0.455591	0.518183
708	0.613928	0.507894	0.510287	0.455941	0.518359
709	0.614316	0.5082	0.511189	0.456278	0.518514
710	0.614718	0.508557	0.512106	0.456632	0.518598
711	0.615149	0.508905	0.513029	0.456977	0.518748
712	0.615563	0.50925	0.513932	0.457318	0.518917
713	0.615928	0.509596	0.514793	0.457655	0.519083
714	0.616365	0.509955	0.515747	0.458054	0.519243
715	0.616831	0.510325	0.516708	0.458431	0.519406
716	0.617312	0.510703	0.517661	0.458777	0.519572
717	0.617629	0.511011	0.51851	0.459092	0.519702
718	0.61799	0.511385	0.519408	0.459471	0.519888
719	0.618389	0.511787	0.520338	0.459878	0.520097
720	0.618838	0.512118	0.521261	0.460216	0.520234
721	0.619252	0.512444	0.522155	0.460548	0.520367
722	0.619658	0.512783	0.523048	0.460884	0.520501
723	0.620072	0.513153	0.523964	0.461237	0.520641
724	0.620472	0.513503	0.524898	0.461542	0.520819
725	0.620839	0.513866	0.525804	0.461869	0.520967
726	0.621169	0.514248	0.526673	0.462233	0.521068
727	0.621532	0.514517	0.527567	0.462545	0.521199
728	0.621902	0.514811	0.528454	0.462862	0.521341
729	0.622276	0.515125	0.529341	0.463181	0.52149
730	0.62264	0.515449	0.530258	0.463493	0.521622
731	0.623016	0.515869	0.531185	0.463859	0.521788
732	0.623412	0.516311	0.53212	0.464234	0.521965
733	0.623843	0.516699	0.533065	0.46457	0.522134
734	0.624213	0.517017	0.533996	0.464882	0.522302
735	0.624597	0.517354	0.53494	0.465189	0.52249
736	0.625019	0.517742	0.535908	0.465497	0.522712
737	0.625359	0.518153	0.536815	0.465884	0.522853
738	0.625702	0.518544	0.537732	0.466216	0.523007
739	0.626058	0.51891	0.538665	0.466499	0.523176
740	0.62648	0.519217	0.539635	0.466789	0.523379
741	0.626863	0.519543	0.540526	0.467076	0.523549
742	0.627203	0.519878	0.541397	0.467359	0.523705
743	0.627464	0.520213	0.542327	0.467637	0.523866
744	0.627826	0.520567	0.543257	0.468044	0.524026
745	0.628207	0.520917	0.544187	0.468464	0.524209
746	0.628576	0.521252	0.545115	0.468847	0.524429
747	0.628963	0.521599	0.546074	0.469122	0.524592
748	0.6293	0.52195	0.546988	0.469417	0.524754
749	0.62959	0.522301	0.547857	0.469739	0.524917
750	0.629899	0.522627	0.548759	0.470034	0.525081
751	0.630215	0.522949	0.549685	0.470353	0.525271
752	0.630538	0.523263	0.550621	0.470665	0.525474
753	0.630882	0.523554	0.551542	0.470893	0.525674
754	0.63119	0.523925	0.552429	0.471189	0.525864
755	0.631475	0.524317	0.553305	0.471493	0.526036
756	0.631736	0.524704	0.554181	0.471774	0.526181
757	0.632061	0.525102	0.555165	0.472063	0.526423
758	0.632415	0.525479	0.556138	0.472361	0.526672
759	0.632783	0.525833	0.557082	0.472665	0.526917
760	0.632987	0.526172	0.557933	0.472929	0.527103
761	0.633294	0.52651	0.558832	0.473199	0.527305
762	0.63366	0.526855	0.559765	0.473469	0.527527
763	0.633988	0.527226	0.560699	0.473718	0.527799
764	0.634258	0.5275	0.561602	0.473938	0.528003
765	0.634497	0.527761	0.562491	0.474165	0.528197
766	0.63471	0.528071	0.563369	0.47443	0.528425
767	0.634948	0.528421	0.564267	0.474687	0.528616
768	0.635223	0.528795	0.565183	0.474949	0.528842
769	0.63554	0.529193	0.566118	0.47522	0.529119
770	0.635782	0.529514	0.566994	0.475476	0.529357
771	0.636076	0.529829	0.567911	0.47573	0.529624
772	0.636388	0.530138	0.568842	0.475982	0.5299
773	0.636564	0.530441	0.569667	0.476226	0.530108
774	0.63678	0.530734	0.57055	0.476499	0.530334
775	0.637022	0.531038	0.571462	0.476778	0.530571
776	0.637282	0.531378	0.572378	0.477036	0.530813
777	0.637505	0.531635	0.573236	0.477244	0.531048
778	0.637752	0.531913	0.574122	0.477454	0.531314
779	0.638047	0.532245	0.575066	0.477683	0.53163
780	0.638198	0.532525	0.575844	0.477883	0.531829
781	0.638354	0.53281	0.576666	0.478102	0.532037
782	0.638522	0.533102	0.577532	0.478339	0.532265
783	0.638726	0.533419	0.578428	0.478561	0.532578
784	0.638979	0.533696	0.579287	0.478772	0.532883
785	0.639233	0.533962	0.580124	0.478977	0.533169
786	0.639414	0.534248	0.58095	0.479183	0.533406
787	0.639597	0.534526	0.581788	0.479417	0.533628
788	0.639786	0.534809	0.582638	0.479648	0.533871
789	0.639988	0.535101	0.583498	0.47986	0.534157
790	0.640183	0.535395	0.584315	0.480015	0.534417
791	0.640394	0.535697	0.585171	0.480167	0.534706
792	0.640615	0.536008	0.586061	0.480326	0.53502
793	0.640745	0.53632	0.586877	0.480553	0.535253
794	0.64098	0.536631	0.587735	0.48078	0.535548
795	0.641248	0.536937	0.58861	0.480994	0.535875
796	0.641405	0.537226	0.589453	0.481153	0.536192
797	0.641522	0.537492	0.590267	0.481315	0.536465
798	0.641625	0.537737	0.59106	0.48147	0.536711
799	0.641723	0.537954	0.591824	0.481611	0.536931
800	0.641992	0.538343	0.592717	0.481819	0.537323
801	0.642206	0.538708	0.593604	0.482005	0.537667
802	0.64234	0.539024	0.594466	0.482157	0.537937
803	0.642591	0.539326	0.595291	0.482325	0.538267
804	0.642734	0.539603	0.596077	0.482491	0.538563
805	0.642813	0.539863	0.596843	0.482643	0.53884
806	0.642934	0.540118	0.597643	0.482742	0.539144
807	0.643042	0.540472	0.598453	0.482894	0.539407
808	0.643202	0.540827	0.599287	0.483072	0.539691
809	0.643494	0.541103	0.600167	0.483264	0.540059
810	0.643626	0.5414	0.600976	0.483427	0.540363
811	0.64372	0.541675	0.601743	0.483578	0.540665
812	0.643794	0.541917	0.602468	0.483719	0.540978
813	0.64391	0.542138	0.603205	0.483819	0.541267
814	0.644087	0.54241	0.604043	0.483978	0.541597
815	0.644309	0.542717	0.60494	0.484177	0.541956
816	0.644531	0.542987	0.605723	0.48433	0.542301
817	0.644625	0.543206	0.606448	0.484443	0.542612
818	0.644705	0.543438	0.607173	0.484551	0.542912
819	0.644896	0.54376	0.607958	0.484693	0.543224
820	0.64501	0.544011	0.608673	0.484817	0.543493
821	0.645106	0.544253	0.609417	0.484956	0.543749
822	0.645199	0.544501	0.610222	0.485122	0.543998
823	0.645258	0.544734	0.610896	0.48519	0.544295
824	0.645364	0.544979	0.611617	0.485301	0.544613
825	0.645508	0.545238	0.612378	0.485447	0.544946
826	0.645642	0.545524	0.613105	0.485535	0.545245
827	0.645775	0.545842	0.613839	0.485679	0.545519
828	0.645883	0.546154	0.61456	0.485825	0.54577
829	0.645914	0.546393	0.615227	0.485882	0.54599
830	0.645988	0.546641	0.615916	0.485943	0.546269
831	0.646117	0.546873	0.616656	0.486027	0.546584
832	0.646321	0.547073	0.617476	0.486147	0.546935
833	0.64637	0.547364	0.618178	0.486282	0.547138
834	0.646484	0.54767	0.618879	0.48638	0.547367
835	0.646668	0.547976	0.619584	0.486445	0.547634
836	0.646788	0.548165	0.620275	0.486574	0.547898
837	0.646885	0.548372	0.620946	0.486681	0.548147
838	0.646955	0.548587	0.621599	0.486764	0.548381
839	0.646967	0.548796	0.622215	0.486799	0.548585
840	0.647037	0.549027	0.622918	0.486913	0.548849
841	0.647164	0.549288	0.623644	0.487074	0.549134
842	0.647367	0.549596	0.624362	0.487283	0.549422
843	0.647498	0.549807	0.625057	0.487337	0.549675
844	0.64761	0.550033	0.625741	0.487392	0.549926
845	0.647706	0.550286	0.626415	0.487468	0.550178
846	0.647798	0.550507	0.627038	0.487588	0.550355
847	0.647885	0.550718	0.627665	0.487707	0.550574
848	0.647974	0.550914	0.628299	0.487821	0.550804
849	0.648091	0.551072	0.62895	0.487907	0.550959
850	0.648173	0.551274	0.629555	0.488029	0.551153
851	0.648255	0.551483	0.630166	0.488159	0.551374
852	0.648369	0.551673	0.630821	0.488279	0.55162
853	0.648453	0.551859	0.631426	0.488337	0.551782
854	0.648533	0.552058	0.632028	0.488443	0.551943
855	0.648616	0.552272	0.632636	0.488623	0.55212
856	0.648688	0.552502	0.633226	0.488742	0.55233
857	0.648839	0.552707	0.633835	0.488847	0.552541
858	0.649033	0.552891	0.634459	0.488942	0.552748
859	0.64911	0.553058	0.635084	0.489039	0.552924
860	0.649185	0.553308	0.635648	0.489164	0.553108
861	0.649273	0.553574	0.636212	0.4893	0.553285
862	0.649395	0.553792	0.636842	0.489435	0.553436
863	0.649569	0.553962	0.637473	0.489556	0.553639
864	0.64971	0.554156	0.638077	0.489671	0.553833
865	0.649786	0.554399	0.638638	0.489783	0.554
866	0.649904	0.554614	0.639281	0.489913	0.554177
867	0.650042	0.554838	0.63987	0.490042	0.554337
868	0.6502	0.555065	0.640414	0.490168	0.554488
869	0.650405	0.555248	0.641016	0.490283	0.554687
870	0.650492	0.555468	0.641536	0.490395	0.554775
871	0.650549	0.555704	0.64204	0.490511	0.554837
872	0.6507	0.555932	0.642614	0.490647	0.554987
873	0.650896	0.556201	0.643232	0.490768	0.555257
874	0.651074	0.556436	0.643826	0.49089	0.555472
875	0.651201	0.556595	0.644355	0.49102	0.555545
876	0.651268	0.556839	0.644925	0.49123	0.555656
877	0.651365	0.557089	0.645487	0.491416	0.555768
878	0.6515	0.557336	0.646037	0.491573	0.555882
879	0.651703	0.557558	0.646557	0.49172	0.556064
880	0.651945	0.557787	0.647124	0.491868	0.556242
881	0.652168	0.558014	0.647713	0.492016	0.556396
882	0.652233	0.558213	0.648278	0.492159	0.556458
883	0.652385	0.558444	0.648824	0.492317	0.556571
884	0.652577	0.558689	0.649369	0.492475	0.556691
885	0.652791	0.558943	0.649923	0.492625	0.556796
886	0.652937	0.55909	0.650442	0.492736	0.556898
887	0.653099	0.559295	0.65099	0.492892	0.557032
888	0.653284	0.559576	0.651571	0.493105	0.557198
889	0.653437	0.559789	0.652034	0.493342	0.557271
890	0.653612	0.559973	0.652536	0.493514	0.557319
891	0.653803	0.560145	0.653062	0.49365	0.557365
892	0.654004	0.560353	0.653577	0.493807	0.557483
893	0.6542	0.560583	0.65411	0.494018	0.557588
894	0.654415	0.560823	0.654649	0.494262	0.557711
895	0.654676	0.561061	0.655184	0.494534	0.557879
896	0.654813	0.561253	0.655648	0.494737	0.557965
897	0.65498	0.561452	0.65613	0.494961	0.558038
898	0.655213	0.561669	0.65665	0.495226	0.558111
899	0.655489	0.561862	0.657165	0.495467	0.55816
900	0.655675	0.562033	0.657689	0.495641	0.558204
901	0.655806	0.5622	0.658215	0.495776	0.558258
902	0.656017	0.562451	0.658698	0.495998	0.558391
903	0.65623	0.562662	0.659184	0.496223	0.558501
904	0.656453	0.562897	0.659665	0.496445	0.558601
905	0.656698	0.563241	0.660126	0.496651	0.558699
906	0.656929	0.563468	0.660645	0.496829	0.558773
907	0.657141	0.56367	0.661118	0.497026	0.558838
908	0.657327	0.563869	0.661505	0.497257	0.558896
909	0.657453	0.564009	0.661928	0.497421	0.558907
910	0.657674	0.564218	0.66238	0.497615	0.558938
911	0.65797	0.564482	0.662859	0.49784	0.559001
912	0.658205	0.564685	0.663355	0.498079	0.559172
913	0.6584	0.564856	0.663806	0.498306	0.559232
914	0.658573	0.565016	0.664206	0.498507	0.559219
915	0.658732	0.56519	0.664513	0.498641	0.559155
916	0.658963	0.565411	0.664973	0.498925	0.559198
917	0.659257	0.565658	0.665522	0.499246	0.559301
918	0.659631	0.565929	0.666158	0.499569	0.559467
919	0.659881	0.566132	0.666577	0.499881	0.559537
920	0.660127	0.566337	0.667018	0.50021	0.559578
921	0.660383	0.566553	0.667493	0.500556	0.559602
922	0.660747	0.566835	0.667966	0.500872	0.559725
923	0.661003	0.567068	0.66844	0.50113	0.559785
924	0.661218	0.56728	0.668913	0.501367	0.55982
925	0.66151	0.567522	0.669377	0.501654	0.559894
926	0.661796	0.567762	0.66978	0.5019	0.559929
927	0.662084	0.567984	0.670195	0.502134	0.559968
928	0.662378	0.568167	0.670666	0.502366	0.560037
929	0.662704	0.568373	0.671143	0.502642	0.56005
930	0.663023	0.568623	0.671608	0.502948	0.560102
931	0.663327	0.568919	0.672057	0.50328	0.560201
932	0.663586	0.569121	0.672467	0.503542	0.560206
933	0.663822	0.569298	0.672903	0.503822	0.560222
934	0.664067	0.569471	0.673356	0.504108	0.560255
935	0.664426	0.569708	0.673802	0.504356	0.560348
936	0.664671	0.569907	0.674195	0.504543	0.560382
937	0.664927	0.570096	0.674584	0.50469	0.560396
938	0.6653	0.570289	0.675005	0.504792	0.56041
939	0.665582	0.570495	0.675394	0.504933	0.560436
940	0.66584	0.570717	0.675759	0.505049	0.560436
941	0.666085	0.570955	0.676097	0.505122	0.560402
942	0.666349	0.571115	0.676475	0.505104	0.56046
943	0.666585	0.571255	0.676824	0.50515	0.560469
944	0.666824	0.571393	0.677172	0.505292	0.560471
945	0.667204	0.571617	0.677645	0.505723	0.560659
946	0.667411	0.57183	0.677946	0.506066	0.560681
947	0.667582	0.572029	0.678218	0.506444	0.56065
948	0.667855	0.572203	0.6786	0.507016	0.560662
949	0.668136	0.572366	0.678979	0.507625	0.560756
950	0.668321	0.572459	0.679299	0.50818	0.560741
951	0.668363	0.572452	0.679531	0.508641	0.560541
952	0.668588	0.572516	0.679877	0.509134	0.560551
953	0.668798	0.572637	0.680198	0.509581	0.560534
954	0.668975	0.572796	0.680494	0.509987	0.560483
955	0.669038	0.572878	0.680785	0.510394	0.56039
956	0.669135	0.573016	0.681106	0.510796	0.560316
957	0.669228	0.573174	0.681448	0.511172	0.560249
958	0.669249	0.573303	0.681809	0.511465	0.560176
959	0.669378	0.573462	0.682209	0.511775	0.560211
960	0.669543	0.573621	0.682637	0.51206	0.560279
961	0.669724	0.573763	0.683093	0.512292	0.56036
962	0.669918	0.573986	0.68351	0.512318	0.560493
963	0.67007	0.574145	0.683818	0.51218	0.560533
964	0.670191	0.574248	0.684017	0.511885	0.560477
965	0.670456	0.574541	0.684191	0.511517	0.560432
966	0.670734	0.574863	0.684416	0.511264	0.560402
967	0.671047	0.575182	0.684674	0.511102	0.560403
968	0.671471	0.575415	0.684932	0.511037	0.560493
969	0.671909	0.575574	0.685276	0.511134	0.560466
970	0.672356	0.575763	0.685658	0.51146	0.560456
971	0.672803	0.576056	0.686057	0.512144	0.560553
972	0.673287	0.576296	0.686649	0.513217	0.560464
973	0.673824	0.576569	0.68739	0.514427	0.560413
974	0.67442	0.576887	0.688277	0.515733	0.560433
975	0.675117	0.57721	0.689016	0.516639	0.560543
976	0.675658	0.577469	0.689563	0.517414	0.560572
977	0.676117	0.577692	0.69	0.518081	0.560546
978	0.676677	0.577938	0.690511	0.518627	0.560518
979	0.677092	0.57806	0.690878	0.519104	0.560397
980	0.67749	0.578217	0.691221	0.519604	0.560278
981	0.677964	0.578553	0.691625	0.520209	0.560243
982	0.676409	0.577745	0.690341	0.518214	0.560579
983	0.676683	0.577923	0.690603	0.518635	0.560466
984	0.677029	0.578094	0.690825	0.519128	0.560366
985	0.677425	0.578264	0.691076	0.519623	0.560301
986	0.677793	0.578434	0.691391	0.520023	0.56027
987	0.678075	0.578562	0.691697	0.520353	0.560216
988	0.678266	0.578683	0.691963	0.520665	0.560111
989	0.678457	0.578856	0.692196	0.520967	0.559979
990	0.678661	0.579014	0.692324	0.521308	0.559855
991	0.678864	0.579127	0.692505	0.521704	0.559797
992	0.679036	0.579241	0.692765	0.522089	0.559729
993	0.67922	0.579398	0.692993	0.522443	0.559626
994	0.679428	0.579563	0.6932	0.522743	0.55949
995	0.6796	0.579667	0.693358	0.522983	0.559331
996	0.67977	0.579752	0.693487	0.523249	0.559224
997	0.67999	0.579885	0.693643	0.523578	0.559205
998	0.68024	0.580033	0.693846	0.523917	0.559209
999	0.68048	0.580143	0.694099	0.524255	0.559192
1000	0.68075	0.580257	0.694403	0.524598	0.559161
1001	0.68101	0.580395	0.694698	0.52488	0.559107
1002	0.681261	0.58051	0.69496	0.525171	0.559071
1003	0.681518	0.58063	0.695214	0.525506	0.55906
1004	0.681766	0.580773	0.695466	0.525794	0.559011
1005	0.682026	0.580875	0.695713	0.526067	0.558979
1006	0.682264	0.580953	0.695947	0.526358	0.558948
1007	0.682504	0.581048	0.696211	0.526669	0.558924
1008	0.682755	0.581135	0.696486	0.526976	0.558883
1009	0.683029	0.58121	0.696762	0.527275	0.558818
1010	0.683356	0.581317	0.697083	0.52757	0.558804
1011	0.683726	0.581461	0.697464	0.527878	0.558865
1012	0.684078	0.581598	0.697841	0.528191	0.558922
1013	0.684395	0.58171	0.698176	0.528469	0.558961
1014	0.684725	0.581805	0.698525	0.528724	0.559034
1015	0.685041	0.581858	0.698909	0.529044	0.559086
1016	0.685363	0.581953	0.699307	0.529414	0.559115
1017	0.685767	0.582088	0.699732	0.529751	0.559173
1018	0.686108	0.582208	0.700095	0.530029	0.559219
1019	0.686436	0.582371	0.700433	0.530296	0.559274
1020	0.686757	0.582498	0.700745	0.530535	0.559307
1021	0.687046	0.582588	0.70107	0.530789	0.559341
1022	0.687422	0.582727	0.701508	0.53112	0.559441
1023	0.687863	0.582899	0.701979	0.531459	0.559569
1024	0.68824	0.583038	0.702354	0.531728	0.55965
1025	0.688526	0.583135	0.702642	0.531954	0.559672
1026	0.688804	0.58323	0.702925	0.532188	0.559662
1027	0.689119	0.583358	0.70326	0.532425	0.559674
1028	0.689442	0.583534	0.703672	0.532674	0.559723
1029	0.689752	0.583711	0.704108	0.532964	0.559797
1030	0.690033	0.583852	0.704449	0.533231	0.559881
1031	0.690314	0.584024	0.704696	0.533448	0.559918
1032	0.690623	0.584228	0.704941	0.53366	0.55994
1033	0.690852	0.584356	0.705198	0.533844	0.559938
1034	0.691039	0.584448	0.705456	0.534026	0.559921
1035	0.691279	0.58461	0.705744	0.534272	0.559942
1036	0.691542	0.584814	0.706041	0.534527	0.55998
1037	0.691772	0.584991	0.706295	0.534719	0.559964
1038	0.691964	0.585131	0.706506	0.534868	0.559904
1039	0.692104	0.58525	0.706682	0.534989	0.559835
1040	0.692225	0.585374	0.706871	0.535108	0.559795
1041	0.692371	0.585524	0.707106	0.53527	0.55981
1042	0.692521	0.585672	0.707313	0.535452	0.559811
1043	0.692623	0.585779	0.707422	0.535619	0.559712
1044	0.692722	0.585883	0.70751	0.53579	0.559607
1045	0.692833	0.585987	0.707556	0.535954	0.559481
1046	0.692935	0.586084	0.707601	0.53609	0.559362
1047	0.693029	0.586183	0.707687	0.536237	0.559296
1048	0.693112	0.586269	0.707775	0.536373	0.559229
1049	0.693164	0.586328	0.70783	0.536484	0.559118
1050	0.693181	0.586377	0.707917	0.53659	0.558973
1051	0.693208	0.586443	0.708035	0.536711	0.558851
1052	0.693277	0.586535	0.708125	0.536843	0.558781
1053	0.693355	0.586629	0.708174	0.536975	0.558708
1054	0.693419	0.586678	0.708201	0.537116	0.558596
1055	0.693476	0.586685	0.708245	0.537258	0.558486
1056	0.69352	0.586657	0.708294	0.537362	0.55841
1057	0.693549	0.58666	0.708306	0.53745	0.558325
1058	0.693623	0.586709	0.708314	0.537582	0.558218
1059	0.69373	0.586763	0.708388	0.537737	0.558126
1060	0.693823	0.586805	0.708497	0.537905	0.558068
1061	0.693944	0.586807	0.708589	0.538088	0.557999
1062	0.694082	0.586797	0.708679	0.538265	0.557908
1063	0.694176	0.586766	0.708776	0.538411	0.557835
1064	0.694275	0.586736	0.708868	0.538531	0.557778
1065	0.694437	0.586755	0.709014	0.538652	0.557756
1066	0.694628	0.586781	0.709196	0.538816	0.557754
1067	0.694841	0.586787	0.709378	0.539048	0.557786
1068	0.695044	0.586787	0.709531	0.539268	0.55782
1069	0.695244	0.586777	0.709683	0.539462	0.557844
1070	0.69545	0.586752	0.709854	0.539663	0.55786
1071	0.695656	0.586743	0.710023	0.539827	0.557871
1072	0.695902	0.586771	0.710223	0.539986	0.557916
1073	0.696185	0.586776	0.710489	0.540195	0.557984
1074	0.696413	0.586735	0.710721	0.540408	0.558048
1075	0.696622	0.586711	0.710966	0.540601	0.558099
1076	0.696915	0.586722	0.711291	0.540839	0.558169
1077	0.697272	0.586753	0.711614	0.541114	0.55828
1078	0.697627	0.586775	0.711886	0.541323	0.558364
1079	0.697961	0.586779	0.712161	0.541509	0.55844
1080	0.698297	0.586767	0.712494	0.541709	0.558573
1081	0.698632	0.586762	0.712828	0.541916	0.558721
1082	0.698928	0.586771	0.713119	0.542113	0.558849
1083	0.699213	0.586777	0.7134	0.5423	0.55896
1084	0.699532	0.586784	0.71374	0.542501	0.559089
1085	0.699858	0.586798	0.714091	0.542712	0.559232
1086	0.700203	0.586807	0.714424	0.54294	0.55938
1087	0.700581	0.586819	0.714774	0.543181	0.559529
1088	0.70093	0.586807	0.715122	0.543387	0.559682
1089	0.701241	0.58678	0.715462	0.543556	0.55984
1090	0.701568	0.586788	0.715813	0.543737	0.559992
1091	0.701896	0.586817	0.716129	0.543933	0.560129
1092	0.702211	0.586838	0.716442	0.544129	0.560264
1093	0.702532	0.586864	0.716776	0.544329	0.560396
1094	0.702841	0.586893	0.717093	0.544532	0.560532
1095	0.703119	0.5869	0.717405	0.544734	0.560668
1096	0.703391	0.586899	0.717711	0.544917	0.560797
1097	0.703657	0.586909	0.717952	0.545025	0.560929
1098	0.703917	0.586927	0.71818	0.545126	0.561057
1099	0.704149	0.586909	0.718429	0.545255	0.561143
1100	0.704369	0.586871	0.71868	0.545388	0.561218
1101	0.704629	0.586854	0.718914	0.545537	0.561297
1102	0.704912	0.586856	0.71915	0.545694	0.561381
1103	0.705158	0.586896	0.719359	0.545837	0.561493
1104	0.705376	0.586949	0.719547	0.545981	0.561619
1105	0.705545	0.586937	0.719679	0.546107	0.561686
1106	0.705647	0.586862	0.719759	0.54619	0.561695
1107	0.705743	0.586807	0.719846	0.546281	0.561736
1108	0.705851	0.58679	0.719937	0.546385	0.561811
1109	0.705958	0.586781	0.720015	0.546479	0.561869
1110	0.706045	0.586781	0.720081	0.546582	0.561903
1111	0.706108	0.586772	0.720144	0.546679	0.561922
1112	0.706101	0.586723	0.720163	0.546726	0.561903
1113	0.706099	0.586672	0.720175	0.546768	0.561889
1114	0.706126	0.586644	0.720166	0.546837	0.561901
1115	0.706153	0.586625	0.720154	0.546913	0.561912
1116	0.706204	0.586636	0.720187	0.546994	0.561901
1117	0.706266	0.586649	0.720237	0.547073	0.561891
1118	0.706296	0.586632	0.720207	0.547119	0.561886
1119	0.706306	0.586603	0.72014	0.54715	0.561877
1120	0.706304	0.586571	0.720088	0.547184	0.56184
1121	0.706308	0.586552	0.720063	0.54723	0.561791
1122	0.706305	0.586549	0.720052	0.547291	0.561764
1123	0.70628	0.586543	0.720034	0.547356	0.561757
1124	0.706257	0.586529	0.720001	0.547402	0.561759
1125	0.706227	0.586504	0.719943	0.547418	0.56177
1126	0.706192	0.586482	0.719884	0.547424	0.561771
1127	0.70617	0.58649	0.719849	0.547429	0.561756
1128	0.706152	0.586499	0.719821	0.547442	0.561746
1129	0.706185	0.586527	0.719833	0.547479	0.561754
1130	0.706221	0.586555	0.719848	0.547516	0.561766
1131	0.706251	0.586582	0.719869	0.547563	0.561841
1132	0.706276	0.586611	0.719888	0.547611	0.561925
1133	0.706351	0.58666	0.719977	0.54765	0.562014
1134	0.706431	0.586711	0.720079	0.547682	0.562094
1135	0.706519	0.586753	0.720149	0.547741	0.562175
1136	0.706616	0.586794	0.720205	0.54781	0.562265
1137	0.706732	0.586843	0.720287	0.547865	0.562396
1138	0.706858	0.586886	0.720383	0.547908	0.562557
1139	0.706977	0.586922	0.720492	0.547942	0.562685
1140	0.707086	0.586958	0.720621	0.547965	0.56278
1141	0.707201	0.586991	0.720768	0.547999	0.562899
1142	0.70733	0.587019	0.720952	0.548054	0.563044
1143	0.707476	0.587057	0.721139	0.548118	0.563195
1144	0.7077	0.58712	0.721348	0.54821	0.563407
1145	0.70792	0.587179	0.721549	0.548296	0.563613
1146	0.708132	0.587243	0.721758	0.548347	0.563807
1147	0.708338	0.587307	0.721965	0.548398	0.563997
1148	0.708526	0.58737	0.722181	0.548477	0.564202
1149	0.708712	0.587435	0.722395	0.54856	0.564409
1150	0.708898	0.587478	0.722613	0.548637	0.564619
1151	0.709079	0.587509	0.722818	0.548711	0.564822
1152	0.70926	0.587525	0.723015	0.548766	0.565038
1153	0.709443	0.587537	0.72322	0.548807	0.565256
1154	0.709639	0.587583	0.723433	0.548863	0.565468
1155	0.709837	0.587651	0.723638	0.548942	0.565678
1156	0.710032	0.587692	0.723824	0.549014	0.56589
1157	0.710218	0.587699	0.723994	0.549063	0.566101
1158	0.710407	0.587724	0.724192	0.549127	0.566323
1159	0.710585	0.587784	0.724429	0.549207	0.566555
1160	0.710758	0.587845	0.724654	0.549282	0.566779
1161	0.710962	0.587918	0.724898	0.549375	0.567013
1162	0.711161	0.587985	0.725134	0.549471	0.567242
1163	0.711339	0.588007	0.725303	0.54956	0.567442
1164	0.711514	0.58803	0.725471	0.549647	0.56764
1165	0.711711	0.588066	0.725684	0.549719	0.567853
1166	0.711904	0.588102	0.725898	0.549791	0.568062
1167	0.71211	0.588163	0.726117	0.549895	0.5683
1168	0.712317	0.588227	0.726331	0.550004	0.568538
1169	0.712516	0.58826	0.726569	0.550098	0.56877
1170	0.712712	0.588281	0.726814	0.550186	0.568998
1171	0.712875	0.588307	0.727017	0.550258	0.569197
1172	0.713007	0.588333	0.727188	0.550315	0.569371
1173	0.713145	0.588366	0.727353	0.550377	0.569552
1174	0.713293	0.58841	0.727512	0.550446	0.569747
1175	0.713433	0.588438	0.727667	0.550515	0.569941
1176	0.713563	0.588441	0.72782	0.550589	0.570132
1177	0.713697	0.58845	0.727977	0.550666	0.570322
1178	0.713858	0.58848	0.728158	0.550755	0.570514
1179	0.714004	0.588511	0.72833	0.550839	0.570698
1180	0.714078	0.588534	0.728433	0.550902	0.570867
1181	0.714153	0.588555	0.728538	0.550963	0.571038
1182	0.714215	0.588561	0.728676	0.551014	0.571225
1183	0.714273	0.588566	0.728813	0.551064	0.571407
1184	0.714374	0.588578	0.728925	0.551126	0.571572
1185	0.714482	0.588592	0.729034	0.55119	0.571737
1186	0.714573	0.588596	0.729145	0.551232	0.571914
1187	0.714654	0.588597	0.729255	0.551268	0.572088
1188	0.714757	0.588609	0.729384	0.551318	0.572272
1189	0.714874	0.588625	0.729523	0.551374	0.572459
1190	0.714977	0.588643	0.729659	0.551425	0.572657
1191	0.715065	0.588656	0.729785	0.551464	0.57286
1192	0.715144	0.58867	0.729891	0.551513	0.573036
1193	0.715218	0.588691	0.729982	0.551577	0.573183
1194	0.715285	0.588699	0.730073	0.551621	0.573328
1195	0.715343	0.588685	0.73017	0.551636	0.573476
1196	0.715406	0.588675	0.730274	0.551662	0.573628
1197	0.715481	0.588672	0.730392	0.551725	0.57379
1198	0.715549	0.588667	0.730498	0.55178	0.573945
1199	0.715574	0.588638	0.730529	0.551787	0.57407
1200	0.715601	0.588611	0.730562	0.551792	0.574193
1201	0.715624	0.588596	0.730638	0.551783	0.574327
1202	0.715647	0.588582	0.730713	0.551775	0.57446
1203	0.715695	0.588585	0.730802	0.551796	0.574606
1204	0.715747	0.588591	0.730892	0.55182	0.574753
1205	0.715796	0.588576	0.730979	0.551835	0.574883
1206	0.715843	0.588556	0.731063	0.551849	0.575007
1207	0.715885	0.588534	0.731154	0.551852	0.575134
1208	0.715925	0.588512	0.73125	0.551852	0.575263
1209	0.715964	0.588478	0.731328	0.551845	0.575373
1210	0.716005	0.588438	0.731397	0.551835	0.575469
1211	0.716049	0.588411	0.731477	0.551824	0.575571
1212	0.716095	0.588398	0.731567	0.551813	0.575679
1213	0.716132	0.588372	0.731647	0.551788	0.57578
1214	0.716159	0.588326	0.731708	0.551737	0.575874
1215	0.716198	0.588278	0.731778	0.55169	0.575982
1216	0.716264	0.588226	0.731868	0.551653	0.576128
1217	0.716322	0.588173	0.731948	0.551615	0.576272
1218	0.716348	0.588114	0.731994	0.551572	0.576417
1219	0.716376	0.588059	0.732041	0.551527	0.576566
1220	0.716423	0.588021	0.7321	0.551456	0.576779
1221	0.71647	0.587983	0.732158	0.551386	0.576991
1222	0.716532	0.587951	0.732234	0.551334	0.577215
1223	0.716595	0.587919	0.73231	0.551283	0.577439
1224	0.716656	0.587884	0.732353	0.551196	0.57765
1225	0.716717	0.587848	0.73239	0.551105	0.57786
1226	0.716764	0.587798	0.732404	0.551008	0.578063
1227	0.716807	0.587745	0.732412	0.550911	0.578265
1228	0.716857	0.587695	0.732421	0.550809	0.578485
1229	0.716909	0.587645	0.732428	0.550705	0.578714
1230	0.716965	0.58759	0.732426	0.550582	0.578934
1231	0.717024	0.587531	0.732417	0.550444	0.579147
1232	0.717084	0.587486	0.732432	0.550309	0.579366
1233	0.717143	0.587457	0.732477	0.550178	0.579594
1234	0.717193	0.587418	0.732518	0.550044	0.57981
1235	0.717222	0.587358	0.73255	0.549902	0.580002
1236	0.717257	0.587313	0.732601	0.549761	0.580204
1237	0.717307	0.587312	0.732704	0.54962	0.580435
1238	0.717355	0.587308	0.732807	0.54948	0.58066
1239	0.717393	0.587283	0.732912	0.549347	0.580861
1240	0.71743	0.587258	0.733021	0.549215	0.581061
1241	0.717456	0.587211	0.733193	0.549091	0.58126
1242	0.717482	0.587166	0.733364	0.548967	0.581459
1243	0.717529	0.587167	0.73357	0.548931	0.5817
1244	0.717577	0.58717	0.733777	0.5489	0.581943
1245	0.717642	0.587176	0.734022	0.548923	0.582168
1246	0.717709	0.587182	0.734274	0.548956	0.582389
1247	0.717784	0.587189	0.734519	0.549034	0.582582
1248	0.717862	0.587197	0.734761	0.549126	0.582767
1249	0.717955	0.587191	0.734979	0.549244	0.582951
1250	0.718056	0.587177	0.735185	0.549375	0.583133
1251	0.71817	0.58717	0.735413	0.549525	0.583307
1252	0.718295	0.587169	0.735657	0.54969	0.583474
1253	0.718426	0.587164	0.73588	0.549867	0.583625
1254	0.718564	0.587154	0.736078	0.550058	0.583757
1255	0.718697	0.587148	0.736285	0.550255	0.583885
1256	0.718819	0.587146	0.736509	0.550466	0.584004
1257	0.718948	0.587137	0.736726	0.550679	0.584126
1258	0.719093	0.587107	0.73693	0.550899	0.58426
1259	0.719239	0.587079	0.737129	0.551113	0.584393
1260	0.719392	0.587063	0.737312	0.551299	0.584532
1261	0.719543	0.587048	0.737495	0.551481	0.584672
1262	0.719676	0.587038	0.737691	0.551639	0.584831
1263	0.719808	0.587028	0.737886	0.551795	0.58499
1264	0.719918	0.587028	0.738032	0.551905	0.585155
1265	0.720028	0.587028	0.738177	0.552015	0.585319
1266	0.720146	0.587044	0.738345	0.552097	0.585516
1267	0.720264	0.587062	0.738515	0.552177	0.585716
1268	0.720333	0.58708	0.73864	0.552191	0.585901
1269	0.720391	0.587099	0.738754	0.552189	0.586083
1270	0.720454	0.587128	0.73887	0.552168	0.586269
1271	0.720518	0.587161	0.738986	0.55214	0.586458
1272	0.720553	0.587201	0.739091	0.552077	0.586621
1273	0.720571	0.587243	0.73919	0.551995	0.586768
1274	0.720588	0.587305	0.73928	0.551914	0.586912
1275	0.720606	0.587381	0.739361	0.551836	0.587052
1276	0.720599	0.587436	0.739415	0.551729	0.587168
1277	0.720562	0.587463	0.739436	0.551587	0.587252
1278	0.720522	0.587498	0.73945	0.551427	0.587333
1279	0.720473	0.587546	0.73945	0.551237	0.587408
1280	0.72042	0.587595	0.73944	0.551034	0.587488
1281	0.720355	0.587644	0.739398	0.550795	0.587581
1282	0.720289	0.587695	0.739352	0.550544	0.587671
1283	0.720218	0.587751	0.739283	0.550247	0.58775
1284	0.720143	0.587804	0.73921	0.549942	0.58783
1285	0.720041	0.587823	0.739096	0.54958	0.587904
1286	0.719939	0.587842	0.738981	0.549216	0.587979
1287	0.719841	0.587898	0.73885	0.548838	0.588102
1288	0.719742	0.587956	0.738719	0.548457	0.588226
1289	0.719635	0.587957	0.73856	0.548036	0.58834
1290	0.719526	0.587954	0.738399	0.547609	0.588452
1291	0.719397	0.587931	0.73823	0.547168	0.588553
1292	0.719264	0.587904	0.738057	0.546721	0.588652
1293	0.719139	0.587851	0.737908	0.546234	0.588746
1294	0.719018	0.587789	0.737766	0.545733	0.588837
1295	0.718911	0.58773	0.737636	0.545208	0.588932
1296	0.718813	0.587673	0.737514	0.54467	0.589028
1297	0.718703	0.587584	0.737371	0.544092	0.589091
1298	0.718585	0.58747	0.737214	0.543487	0.58913
1299	0.718485	0.587362	0.737063	0.542884	0.589163
1300	0.718404	0.587258	0.736916	0.542283	0.589188
1301	0.718325	0.587157	0.736781	0.541709	0.589206
1302	0.71825	0.587058	0.736662	0.541176	0.589212
1303	0.718171	0.586942	0.736535	0.540668	0.5892
1304	0.718086	0.586788	0.736393	0.540216	0.589153
1305	0.718005	0.586638	0.736251	0.539809	0.589103
1306	0.717933	0.586504	0.736112	0.539542	0.589042
1307	0.717862	0.586368	0.735979	0.539301	0.588981
1308	0.717793	0.586218	0.73588	0.539192	0.588917
1309	0.717723	0.586069	0.735782	0.539094	0.588854
1310	0.71766	0.585943	0.735711	0.53912	0.588793
1311	0.717597	0.585817	0.735641	0.539146	0.588732
1312	0.717538	0.585679	0.735597	0.539236	0.588751
1313	0.717478	0.585541	0.735552	0.539327	0.588771
1314	0.71741	0.585409	0.735484	0.539408	0.588826
1315	0.717341	0.585279	0.735413	0.539489	0.588883
1316	0.717319	0.585161	0.735379	0.539528	0.589052
1317	0.717307	0.585046	0.735353	0.53956	0.589242
1318	0.717278	0.584918	0.735288	0.539516	0.58946
1319	0.717244	0.584786	0.73521	0.539448	0.589687
1320	0.717263	0.58468	0.735148	0.539354	0.590005
1321	0.717305	0.584587	0.735092	0.539249	0.590365
1322	0.717348	0.584499	0.735034	0.539137	0.590733
1323	0.717393	0.584416	0.734976	0.539019	0.591106
1324	0.717433	0.584328	0.734924	0.538913	0.591484
1325	0.717469	0.584235	0.734876	0.538817	0.591863
1326	0.717536	0.584155	0.734846	0.538734	0.592237
1327	0.717641	0.584091	0.734838	0.538669	0.592605
1328	0.717751	0.584039	0.734837	0.538606	0.592966
1329	0.717868	0.584005	0.734847	0.53855	0.593317
1330	0.717981	0.583962	0.734862	0.538495	0.593655
1331	0.718087	0.583901	0.734888	0.538442	0.593963
1332	0.718198	0.583848	0.734928	0.538379	0.594267
1333	0.718329	0.583818	0.735009	0.538271	0.594562
1334	0.718461	0.583787	0.735091	0.538154	0.594852
1335	0.718602	0.583754	0.735168	0.537979	0.595117
1336	0.718741	0.58372	0.735244	0.537797	0.595381
1337	0.71886	0.583664	0.735323	0.537511	0.595629
1338	0.718979	0.583608	0.735402	0.537225	0.595876
1339	0.719117	0.583582	0.735453	0.536844	0.596115
1340	0.719255	0.583555	0.735502	0.536465	0.596352
1341	0.719355	0.583507	0.735456	0.535939	0.596567
1342	0.719451	0.583458	0.735403	0.535405	0.596779
1343	0.719566	0.583421	0.735228	0.534774	0.596996
1344	0.719683	0.583388	0.735035	0.53413	0.597213
1345	0.71976	0.583366	0.73466	0.533306	0.597419
1346	0.719826	0.583347	0.734237	0.532439	0.597619
1347	0.719844	0.583303	0.733613	0.531405	0.597788
1348	0.719844	0.58325	0.732912	0.53031	0.597943
1349	0.719827	0.583191	0.732071	0.52893	0.598097
1350	0.719801	0.583132	0.731157	0.527401	0.598249
1351	0.719756	0.583078	0.730189	0.525741	0.598382
1352	0.719697	0.583027	0.729184	0.52399	0.598498
1353	0.719596	0.582953	0.728179	0.522133	0.598592
1354	0.719454	0.582856	0.727176	0.520176	0.598664
1355	0.719312	0.582761	0.726303	0.518267	0.598733
1356	0.719175	0.582667	0.725593	0.516418	0.598801
1357	0.719013	0.58257	0.72497	0.514644	0.59886
1358	0.718809	0.582465	0.724491	0.512985	0.598904
1359	0.718598	0.582365	0.724109	0.51146	0.598947
1360	0.718367	0.582268	0.723944	0.510223	0.598984
1361	0.718116	0.582166	0.72383	0.50902	0.599015
1362	0.717793	0.582047	0.723884	0.507897	0.599029
1363	0.717466	0.581923	0.723957	0.506754	0.599044
1364	0.717099	0.581762	0.724124	0.505442	0.599059
1365	0.71673	0.5816	0.724288	0.504062	0.599076
1366	0.716299	0.581408	0.724439	0.501882	0.599109
1367	0.715872	0.581218	0.724583	0.499695	0.599143
1368	0.715372	0.580987	0.724552	0.496349	0.599176
1369	0.714879	0.580759	0.724521	0.493043	0.599208
1370	0.714322	0.580482	0.724259	0.488075	0.599239
1371	0.71377	0.580207	0.723992	0.483103	0.599269
1372	0.713179	0.579876	0.723465	0.477061	0.599299
1373	0.71259	0.57954	0.722913	0.470954	0.599329
1374	0.711841	0.579053	0.722001	0.464076	0.599311
1375	0.711065	0.578538	0.721023	0.457093	0.599284
1376	0.7102	0.577902	0.719808	0.450671	0.599213
1377	0.709312	0.577233	0.718528	0.444443	0.599129
1378	0.708268	0.576391	0.71698	0.439288	0.599025
1379	0.707162	0.575481	0.715328	0.434591	0.598913
1380	0.70592	0.574402	0.713463	0.431696	0.598761
1381	0.704607	0.573234	0.711486	0.429788	0.598587
1382	0.703025	0.571859	0.709154	0.429662	0.598367
1383	0.701258	0.570343	0.706577	0.430793	0.598115
1384	0.699265	0.568707	0.703745	0.433258	0.597793
1385	0.697069	0.566965	0.700686	0.436922	0.597407
1386	0.694501	0.56507	0.697255	0.441344	0.596861
1387	0.691505	0.562998	0.693396	0.446637	0.596131
1388	0.688257	0.560882	0.689463	0.451978	0.595167
1389	0.684625	0.558692	0.685408	0.457407	0.593853
1390	0.680662	0.556419	0.681349	0.462616	0.592194
1391	0.676041	0.553976	0.677259	0.467436	0.589867
1392	0.671295	0.551542	0.673401	0.471806	0.587373
1393	0.666185	0.549106	0.670081	0.475091	0.58443
1394	0.66095	0.546673	0.666989	0.478017	0.581418
1395	0.655219	0.544213	0.664633	0.479752	0.578125
1396	0.649523	0.5418	0.662499	0.481211	0.574868
1397	0.643883	0.539569	0.661433	0.481322	0.571723
1398	0.638259	0.53737	0.660489	0.481274	0.568652
1399	0.632578	0.535358	0.660522	0.479911	0.566091
1400	0.626951	0.533379	0.660593	0.47848	0.563608
1401	0.621947	0.53186	0.661376	0.475693	0.562376
1402	0.616958	0.530346	0.662156	0.472914	0.561147
1403	0.612419	0.529295	0.663201	0.468139	0.56088
1404	0.607894	0.528249	0.664244	0.463365	0.560618
1405	0.604219	0.527659	0.664692	0.456587	0.560739
1406	0.600605	0.5271	0.665101	0.449691	0.560886
1407	0.597758	0.526972	0.664674	0.441065	0.561283
1408	0.595015	0.5269	0.664138	0.43222	0.561713
1409	0.593322	0.527196	0.66339	0.423631	0.562199
1410	0.591848	0.527568	0.662598	0.4151	0.562697
1411	0.591441	0.528241	0.661949	0.407315	0.56306
1412	0.591344	0.529003	0.661341	0.399748	0.563383
1413	0.592377	0.529958	0.661283	0.394886	0.563722
1414	0.593849	0.530989	0.661437	0.391072	0.564067
1415	0.596477	0.53222	0.663033	0.390921	0.564577
1416	0.599685	0.53355	0.66535	0.392597	0.56517
1417	0.603739	0.534973	0.669101	0.397305	0.565864
1418	0.608327	0.536455	0.673757	0.403919	0.566623
1419	0.613639	0.537981	0.679128	0.412518	0.567386
1420	0.619518	0.539543	0.68506	0.422672	0.568153
1421	0.625586	0.541049	0.69089	0.433499	0.568818
1422	0.631841	0.542502	0.696626	0.444981	0.569385
1423	0.638239	0.543919	0.702226	0.4565	0.569793
1424	0.644808	0.545291	0.707666	0.468062	0.570015
1425	0.651107	0.546565	0.712451	0.478618	0.57004
1426	0.657011	0.547693	0.716283	0.48771	0.569783
1427	0.662748	0.548771	0.719583	0.496105	0.569351
1428	0.66818	0.549755	0.721927	0.503243	0.568607
1429	0.673296	0.550674	0.723967	0.509731	0.567743
1430	0.677689	0.551446	0.725318	0.514738	0.566612
1431	0.681889	0.552193	0.726557	0.519402	0.565383
1432	0.685513	0.552862	0.727466	0.523059	0.563885
1433	0.688942	0.553505	0.728319	0.526479	0.562355
1434	0.691614	0.554049	0.728949	0.528984	0.56072
1435	0.694199	0.554581	0.729558	0.531392	0.559065
1436	0.696307	0.555041	0.730049	0.533265	0.557336
1437	0.698347	0.55549	0.730527	0.535081	0.555626
1438	0.699828	0.555842	0.730888	0.536405	0.554094
1439	0.701288	0.556191	0.731244	0.53771	0.552577
1440	0.702403	0.55649	0.731508	0.538705	0.551307
1441	0.703516	0.556788	0.731771	0.539699	0.550048
1442	0.704314	0.557046	0.731999	0.540473	0.549332
1443	0.705115	0.557305	0.732229	0.54125	0.548612
1444	0.705741	0.557524	0.732424	0.541865	0.548486
1445	0.706365	0.557743	0.73262	0.54248	0.54837
1446	0.706842	0.557909	0.732777	0.543004	0.548889
1447	0.707308	0.558071	0.732931	0.543522	0.549454
1448	0.70769	0.558237	0.733048	0.544018	0.550554
1449	0.708063	0.558403	0.733161	0.544512	0.551724
1450	0.708411	0.558556	0.733317	0.545008	0.553231
1451	0.708754	0.558706	0.733482	0.545505	0.554805
1452	0.709017	0.558851	0.733623	0.545992	0.556561
1453	0.709262	0.558996	0.733761	0.546479	0.55837
1454	0.709487	0.559122	0.733898	0.546928	0.560088
1455	0.709706	0.559243	0.734036	0.547367	0.561783
1456	0.709895	0.559353	0.734169	0.547777	0.563336
1457	0.71007	0.559457	0.734301	0.548177	0.564837
1458	0.710221	0.559539	0.734414	0.548514	0.566119
1459	0.710362	0.559612	0.734519	0.548823	0.567299
1460	0.710505	0.559693	0.734618	0.549105	0.568307
1461	0.710651	0.559779	0.734715	0.549372	0.56922
1462	0.710788	0.559863	0.734812	0.549605	0.569959
1463	0.710918	0.559945	0.734909	0.549813	0.57058
1464	0.711058	0.560032	0.735011	0.550019	0.571087
1465	0.711206	0.560122	0.735117	0.550226	0.5715
1466	0.711356	0.560232	0.735239	0.550418	0.57184
1467	0.711506	0.560359	0.735377	0.550595	0.572113
1468	0.711651	0.56048	0.735502	0.550759	0.572325
1469	0.711793	0.560593	0.735615	0.550908	0.57247
1470	0.711944	0.560723	0.735749	0.551063	0.572599
1471	0.712106	0.560878	0.735909	0.551228	0.572704
1472	0.712261	0.561031	0.736083	0.551398	0.572816
1473	0.712405	0.561182	0.736279	0.551575	0.572935
1474	0.712542	0.561338	0.73647	0.551742	0.573057
1475	0.712667	0.561501	0.736651	0.551894	0.573181
1476	0.712799	0.561671	0.736841	0.552046	0.573339
1477	0.712946	0.561854	0.73705	0.5522	0.573564
1478	0.7131	0.562034	0.737263	0.552355	0.573824
1479	0.713269	0.562206	0.737486	0.552512	0.574167
1480	0.713437	0.562383	0.737709	0.552667	0.574551
1481	0.713608	0.562579	0.737934	0.552816	0.575047
1482	0.713784	0.562778	0.738162	0.552964	0.575578
1483	0.71397	0.562984	0.738395	0.553108	0.576234
1484	0.714157	0.563189	0.738631	0.553253	0.57692
1485	0.714347	0.563402	0.738875	0.553393	0.577737
1486	0.714536	0.563616	0.739122	0.553537	0.578576
1487	0.714728	0.563845	0.739383	0.553707	0.579536
1488	0.714921	0.564072	0.739645	0.553874	0.580513
1489	0.71512	0.564276	0.739892	0.554004	0.581592
1490	0.715321	0.564481	0.740142	0.554136	0.582677
1491	0.715544	0.564711	0.74042	0.554297	0.583807
1492	0.715767	0.56494	0.740699	0.554459	0.58494
1493	0.715966	0.565146	0.740944	0.554608	0.58611
1494	0.716164	0.565352	0.741189	0.554758	0.587281
1495	0.716339	0.565559	0.741445	0.554885	0.588379
1496	0.716514	0.565768	0.741703	0.555012	0.589478
1497	0.716716	0.565997	0.741967	0.555153	0.590559
1498	0.716919	0.566227	0.742232	0.555295	0.591641
1499	0.717116	0.566429	0.742493	0.555425	0.592645
1500	0.717313	0.56663	0.742755	0.555555	0.593649
1501	0.717497	0.566851	0.743027	0.555729	0.594591
1502	0.71768	0.567073	0.7433	0.555908	0.595532
1503	0.717878	0.567282	0.743603	0.556104	0.596391
1504	0.718077	0.567489	0.74391	0.556302	0.597242
1505	0.718303	0.567715	0.744251	0.556505	0.598068
1506	0.718535	0.567945	0.744601	0.556711	0.598895
1507	0.718766	0.568155	0.744929	0.556896	0.599621
1508	0.718997	0.568363	0.745254	0.557078	0.600328
1509	0.71922	0.568577	0.745599	0.557274	0.600989
1510	0.719439	0.568791	0.745948	0.557472	0.601641
1511	0.719653	0.568982	0.746289	0.557662	0.60224
1512	0.719867	0.569167	0.746631	0.557849	0.602825
1513	0.720094	0.569354	0.746984	0.558042	0.603389
1514	0.720327	0.569543	0.747343	0.55824	0.60395
1515	0.720552	0.569703	0.747688	0.558433	0.604453
1516	0.720774	0.569853	0.748028	0.558622	0.604936
1517	0.720986	0.570008	0.748365	0.558792	0.6054
1518	0.721193	0.570166	0.748702	0.558955	0.605859
1519	0.721391	0.570306	0.749017	0.55913	0.606286
1520	0.721583	0.570436	0.749323	0.55931	0.606696
1521	0.72179	0.570576	0.749651	0.559492	0.607105
1522	0.722006	0.570723	0.749992	0.559675	0.607514
1523	0.722201	0.570842	0.750305	0.559843	0.60788
1524	0.722385	0.570947	0.750603	0.560005	0.608221
1525	0.72257	0.571032	0.750902	0.560142	0.608561
1526	0.722757	0.571104	0.751201	0.560262	0.608904
1527	0.722921	0.571179	0.751489	0.560385	0.60922
1528	0.723067	0.571259	0.751767	0.560511	0.609518
1529	0.723247	0.571344	0.752062	0.560641	0.609842
1530	0.72345	0.571431	0.752367	0.560776	0.610184
1531	0.723635	0.571487	0.75265	0.560896	0.610494
1532	0.723807	0.571519	0.752923	0.561005	0.610777
1533	0.723992	0.571565	0.753213	0.561114	0.611062
1534	0.724185	0.57162	0.753516	0.561222	0.611352
1535	0.724355	0.571654	0.753798	0.561313	0.611617
1536	0.724505	0.571667	0.75406	0.561387	0.611858
1537	0.72467	0.571695	0.75434	0.561496	0.612106
1538	0.724855	0.571736	0.754635	0.561642	0.612357
1539	0.725038	0.571777	0.754913	0.561778	0.612598
1540	0.725217	0.571819	0.755172	0.561902	0.612832
1541	0.725386	0.571853	0.755427	0.562025	0.613063
1542	0.725541	0.571878	0.75568	0.56215	0.613293
1543	0.725683	0.571894	0.75592	0.562266	0.613506
1544	0.725812	0.571898	0.756143	0.56237	0.613696
1545	0.725955	0.5719	0.756369	0.562475	0.613898
1546	0.726114	0.571896	0.756597	0.562577	0.614114
1547	0.72626	0.571888	0.756818	0.562684	0.61432
1548	0.72638	0.571875	0.757023	0.562797	0.614507
1549	0.726488	0.571866	0.757227	0.562904	0.614697
1550	0.726583	0.571865	0.757431	0.563006	0.614897
1551	0.726685	0.571864	0.757628	0.563106	0.615085
1552	0.726801	0.571861	0.757818	0.563202	0.615257
1553	0.726917	0.571851	0.758006	0.563293	0.615429
1554	0.727032	0.571828	0.758182	0.563375	0.615593
1555	0.727146	0.571811	0.758355	0.563456	0.61576
1556	0.727248	0.571807	0.758522	0.563535	0.61593
1557	0.727361	0.571807	0.758698	0.563628	0.616111
1558	0.727498	0.57182	0.758898	0.563748	0.616315
1559	0.727628	0.571833	0.759088	0.563863	0.616511
1560	0.727744	0.571853	0.759257	0.563971	0.616689
1561	0.727857	0.571863	0.759427	0.564071	0.616865
1562	0.727953	0.57184	0.759585	0.564149	0.617021
1563	0.728042	0.571821	0.759734	0.564233	0.617174
1564	0.728119	0.571817	0.759873	0.564335	0.617322
1565	0.72819	0.571809	0.760006	0.564427	0.617466
1566	0.728242	0.571788	0.76012	0.56449	0.617595
1567	0.728293	0.571764	0.76023	0.564557	0.617723
1568	0.728336	0.571729	0.760327	0.564638	0.617844
1569	0.728388	0.571697	0.760432	0.564723	0.617967
1570	0.728463	0.57168	0.760565	0.564803	0.618095
1571	0.72853	0.571665	0.760691	0.564887	0.618218
1572	0.728562	0.571658	0.760793	0.564994	0.618326
1573	0.728589	0.571652	0.760887	0.565092	0.618427
1574	0.728606	0.571643	0.760943	0.565156	0.618499
1575	0.728628	0.571629	0.761003	0.565223	0.618568
1576	0.72866	0.571614	0.76108	0.565294	0.618626
1577	0.728684	0.571596	0.761152	0.565361	0.618682
1578	0.728675	0.571554	0.761204	0.565414	0.618733
1579	0.728665	0.571511	0.761255	0.56547	0.618779
1580	0.728653	0.571457	0.761304	0.565539	0.618811
1581	0.728642	0.571404	0.761347	0.565603	0.618845
1582	0.728624	0.571354	0.76136	0.565637	0.618881
1583	0.728608	0.571306	0.761378	0.565676	0.618918
1584	0.7286	0.571267	0.761416	0.565741	0.618959
1585	0.728586	0.571221	0.761446	0.565801	0.618995
1586	0.728561	0.571168	0.761448	0.565833	0.61902
1587	0.728536	0.571121	0.761453	0.56587	0.619044
1588	0.72848	0.571066	0.761456	0.56591	0.619033
1589	0.728424	0.57101	0.761456	0.565947	0.619021
1590	0.728371	0.570957	0.761454	0.565984	0.619018
1591	0.728313	0.570901	0.761444	0.566017	0.619014
1592	0.72825	0.570847	0.761408	0.566029	0.619005
1593	0.728194	0.5708	0.761377	0.566046	0.619
1594	0.72816	0.57077	0.761353	0.566088	0.619004
1595	0.728124	0.57074	0.761328	0.566129	0.619011
1596	0.728095	0.570721	0.761307	0.566158	0.619031
1597	0.728064	0.570697	0.761288	0.566186	0.619049
1598	0.728014	0.570661	0.761294	0.566211	0.619077
1599	0.727965	0.570626	0.761299	0.56624	0.619105
1600	0.727909	0.570584	0.761273	0.566286	0.619098
1601	0.727844	0.570535	0.761241	0.566322	0.619087
1602	0.727749	0.570466	0.761181	0.5663	0.619057
1603	0.72766	0.570403	0.761126	0.566282	0.619029
1604	0.727595	0.570354	0.761092	0.566277	0.619007
1605	0.727528	0.570305	0.761057	0.566272	0.618985
1606	0.727436	0.570277	0.761008	0.566286	0.618974
1607	0.727344	0.570246	0.760957	0.566299	0.618963
1608	0.72729	0.570191	0.760904	0.566314	0.618967
1609	0.727232	0.570136	0.760847	0.566324	0.618967
1610	0.727142	0.570083	0.760769	0.566299	0.618941
1611	0.727057	0.570036	0.760699	0.566281	0.618923
1612	0.727017	0.57003	0.760676	0.566317	0.618949
1613	0.726979	0.570023	0.760646	0.566351	0.618969
1614	0.726922	0.570008	0.760597	0.566348	0.618941
1615	0.726861	0.569992	0.760551	0.566346	0.618919
1616	0.726793	0.569975	0.760513	0.566367	0.61893
1617	0.726728	0.569959	0.760478	0.566386	0.618939
1618	0.726679	0.569936	0.760463	0.566392	0.61894
1619	0.726632	0.569908	0.760443	0.566398	0.618938
1620	0.7266	0.569855	0.760388	0.566387	0.618931
1621	0.726567	0.569803	0.760336	0.566375	0.618926
1622	0.726545	0.569784	0.760339	0.56637	0.618941
1623	0.726526	0.569773	0.760344	0.566374	0.618962
1624	0.726499	0.569773	0.760331	0.566399	0.618983
1625	0.726468	0.569769	0.760318	0.566421	0.619002
1626	0.726434	0.569761	0.76032	0.566426	0.619019
1627	0.726407	0.569761	0.760328	0.566435	0.619042
1628	0.726409	0.569792	0.760361	0.566472	0.619115
1629	0.726416	0.569818	0.760392	0.56651	0.619188
1630	0.726429	0.569807	0.76043	0.56654	0.619243
1631	0.726442	0.569796	0.760467	0.56657	0.619296
1632	0.726471	0.569814	0.760507	0.566608	0.619349
1633	0.726506	0.569838	0.760553	0.566646	0.619406
1634	0.726562	0.569878	0.760628	0.566671	0.61948
1635	0.72661	0.569907	0.760697	0.566698	0.619546
1636	0.726613	0.569893	0.760726	0.566743	0.619573
1637	0.726627	0.569878	0.760755	0.566785	0.6196
1638	0.726709	0.569858	0.760772	0.566798	0.619623
1639	0.726784	0.569851	0.760791	0.566816	0.619657
1640	0.726822	0.569914	0.760853	0.566873	0.619751
1641	0.726861	0.569974	0.760925	0.56693	0.619842
1642	0.726898	0.570012	0.761021	0.566978	0.619909
1643	0.726937	0.570053	0.761115	0.567033	0.619975
1644	0.727005	0.570098	0.761212	0.567119	0.620043
1645	0.727073	0.570141	0.761304	0.567202	0.620114
1646	0.727125	0.57018	0.761364	0.567262	0.620188
1647	0.727184	0.570219	0.761445	0.567319	0.620261
1648	0.727259	0.570267	0.761611	0.567368	0.620333
1649	0.727327	0.570311	0.761761	0.567423	0.620409
1650	0.727365	0.570324	0.761839	0.56748	0.620485
1651	0.727409	0.570335	0.761923	0.56753	0.620553
1652	0.727482	0.570351	0.762031	0.567573	0.620602
1653	0.72756	0.570381	0.762139	0.567626	0.62065
1654	0.727646	0.570452	0.762254	0.567711	0.620706
1655	0.727733	0.570518	0.762371	0.567787	0.62078
1656	0.727825	0.570565	0.762484	0.567823	0.620884
1657	0.727924	0.570614	0.762594	0.567861	0.620976
1658	0.728033	0.570673	0.762693	0.567906	0.621042
1659	0.728129	0.570719	0.762798	0.567945	0.621106
1660	0.728204	0.570739	0.762917	0.567965	0.621177
1661	0.728291	0.570771	0.763041	0.568001	0.621262
1662	0.7284	0.570827	0.763172	0.568074	0.621371
1663	0.728506	0.570874	0.763293	0.568143	0.621474
1664	0.728602	0.5709	0.763399	0.568203	0.621567
1665	0.728693	0.570937	0.763508	0.568257	0.621655
1666	0.728772	0.570998	0.76362	0.5683	0.621735
1667	0.728847	0.571049	0.763727	0.568341	0.621815
1668	0.728918	0.571077	0.76383	0.568373	0.621894
1669	0.728998	0.571108	0.763931	0.568408	0.62198
1670	0.729093	0.571151	0.764036	0.568452	0.622075
1671	0.729193	0.571182	0.764145	0.568507	0.622167
1672	0.7293	0.571195	0.764252	0.568583	0.62226
1673	0.729409	0.571226	0.764368	0.568657	0.622357
1674	0.729512	0.571281	0.764491	0.568717	0.622453
1675	0.729638	0.571348	0.76463	0.568785	0.622564
1676	0.729803	0.571433	0.764794	0.568871	0.622702
1677	0.729937	0.571506	0.76495	0.56896	0.622817
1678	0.730028	0.571558	0.765096	0.569046	0.622901
1679	0.730138	0.571613	0.765243	0.569133	0.623011
1680	0.730274	0.571678	0.765389	0.569228	0.62316
1681	0.730401	0.571751	0.765543	0.569302	0.623293
1682	0.730514	0.571834	0.765704	0.569352	0.6234
1683	0.730609	0.571897	0.765828	0.569389	0.623484
1684	0.730692	0.571934	0.765911	0.569416	0.623542
1685	0.730794	0.571989	0.766027	0.56947	0.623619
1686	0.73091	0.572067	0.766182	0.569554	0.623718
1687	0.731043	0.572138	0.766321	0.569635	0.623823
1688	0.7312	0.572204	0.766448	0.569713	0.623934
1689	0.73136	0.572266	0.766598	0.569784	0.62405
1690	0.731521	0.572322	0.766763	0.569847	0.624169
1691	0.731683	0.572384	0.766938	0.569905	0.624299
1692	0.731844	0.572445	0.767114	0.569955	0.624434
1693	0.731978	0.572475	0.767266	0.56999	0.624558
1694	0.732095	0.572487	0.767403	0.570012	0.624671
1695	0.732247	0.572531	0.767577	0.570056	0.624777
1696	0.732424	0.572595	0.767776	0.570118	0.624887
1697	0.732575	0.572649	0.76795	0.57016	0.62501
1698	0.732712	0.572697	0.768109	0.570191	0.62514
1699	0.732811	0.57273	0.768223	0.570216	0.625242
1700	0.732891	0.572758	0.768318	0.570242	0.62533
1701	0.732958	0.572767	0.768401	0.570235	0.625389
1702	0.733023	0.572765	0.76848	0.570208	0.625433
1703	0.733099	0.572802	0.768606	0.570233	0.625541
1704	0.73318	0.572852	0.768748	0.570282	0.625677
1705	0.733313	0.5729	0.768881	0.570322	0.625814
1706	0.733462	0.572952	0.769011	0.570359	0.625952
1707	0.733563	0.573003	0.76912	0.57037	0.626066
1708	0.733654	0.573053	0.769225	0.570373	0.626173
1709	0.733735	0.573064	0.769305	0.570388	0.626269
1710	0.733816	0.573068	0.769382	0.570409	0.626366
1711	0.733851	0.573056	0.769392	0.570372	0.626435
1712	0.733877	0.573037	0.769388	0.570323	0.626498
1713	0.733985	0.573072	0.769442	0.570363	0.626566
1714	0.734106	0.573118	0.769506	0.570418	0.626633
1715	0.734129	0.573102	0.769545	0.570431	0.626702
1716	0.734137	0.573079	0.76958	0.570436	0.626773
1717	0.734172	0.573076	0.76962	0.570419	0.626804
1718	0.73421	0.573075	0.769663	0.570399	0.626831
1719	0.734224	0.573019	0.769642	0.570387	0.626832
1720	0.734238	0.57296	0.769614	0.570376	0.62683
1721	0.73429	0.572922	0.76957	0.570323	0.626817
1722	0.734346	0.572885	0.769526	0.570268	0.626804
1723	0.734349	0.572907	0.769534	0.570211	0.62683
1724	0.734349	0.572928	0.769542	0.570153	0.626854
1725	0.734372	0.572908	0.769497	0.570084	0.626859
1726	0.734389	0.572882	0.769448	0.57001	0.626864
1727	0.734305	0.572805	0.769341	0.569892	0.62685
1728	0.734226	0.572732	0.769241	0.56977	0.626836
1729	0.73421	0.5727	0.76922	0.569662	0.626822
1730	0.734189	0.572662	0.769185	0.569547	0.626797
1731	0.73415	0.572596	0.769086	0.569396	0.62671
1732	0.7341	0.572524	0.768983	0.569239	0.626626
1733	0.733995	0.572412	0.76886	0.569057	0.626553
1734	0.733885	0.572297	0.76873	0.568878	0.626478
1735	0.733757	0.572176	0.768588	0.568723	0.626402
1736	0.73362	0.572045	0.768437	0.568549	0.626313
1737	0.733448	0.571883	0.768252	0.568305	0.626188
1738	0.733273	0.571743	0.768076	0.568067	0.62605
1739	0.733095	0.571665	0.767931	0.567846	0.625879
1740	0.732924	0.571574	0.767792	0.56763	0.625741
1741	0.732776	0.571458	0.76767	0.567428	0.625678
1742	0.732636	0.571344	0.767543	0.567236	0.625591
1743	0.732514	0.571233	0.767408	0.567069	0.625461
1744	0.732401	0.571131	0.76727	0.566926	0.625343
1745	0.732301	0.571044	0.767128	0.566821	0.625243
1746	0.732225	0.570994	0.767036	0.566719	0.625148
1747	0.732181	0.570997	0.767015	0.566624	0.625061
1748	0.732073	0.57094	0.766919	0.566509	0.624947
1749	0.731888	0.570811	0.766733	0.566373	0.624803
1750	0.731726	0.570697	0.766579	0.566235	0.624685
1751	0.731588	0.570599	0.766457	0.566096	0.624593
1752	0.731416	0.570483	0.766264	0.565954	0.624453
1753	0.731214	0.570351	0.766007	0.565811	0.62427
1754	0.73102	0.570242	0.765793	0.565665	0.624092
1755	0.730832	0.57015	0.76561	0.565519	0.623917
1756	0.730689	0.570038	0.765409	0.56538	0.623778
1757	0.730573	0.569913	0.765194	0.565244	0.623664
1758	0.730378	0.56976	0.764944	0.565064	0.623464
1759	0.730141	0.569592	0.764676	0.564861	0.62322
1760	0.729964	0.569495	0.764462	0.564678	0.623049
1761	0.729813	0.569429	0.76427	0.564502	0.622907
1762	0.729627	0.569329	0.764071	0.564304	0.622752
1763	0.72943	0.569217	0.763869	0.564095	0.622591
1764	0.729257	0.569126	0.763615	0.563822	0.62242
1765	0.729089	0.569039	0.763343	0.563529	0.622243
1766	0.728861	0.568925	0.763049	0.563215	0.62206
1767	0.728619	0.568804	0.762751	0.562895	0.621875
1768	0.728486	0.568748	0.762518	0.562615	0.621754
1769	0.728369	0.568698	0.762289	0.562336	0.621639
1770	0.728269	0.568622	0.762086	0.561984	0.621522
1771	0.728173	0.568545	0.761888	0.561623	0.621407
1772	0.727974	0.568446	0.761587	0.561249	0.621209
1773	0.727768	0.568348	0.761278	0.560869	0.621006
1774	0.727581	0.56826	0.760992	0.560449	0.620828
1775	0.727389	0.568168	0.760702	0.560025	0.620651
1776	0.727251	0.568077	0.76041	0.55959	0.620532
1777	0.727113	0.567992	0.760121	0.559151	0.620411
1778	0.726969	0.56795	0.759874	0.558717	0.620274
1779	0.726817	0.567911	0.759612	0.558273	0.620132
1780	0.726648	0.567906	0.759292	0.557809	0.619976
1781	0.72649	0.567883	0.758971	0.557322	0.619816
1782	0.72679	0.568052	0.759875	0.559439	0.620232
1783	0.72684	0.568028	0.759744	0.558906	0.620216
1784	0.726822	0.567946	0.759588	0.558271	0.620138
1785	0.726794	0.567846	0.759413	0.55763	0.620047
1786	0.72679	0.56777	0.759248	0.557026	0.619976
1787	0.72677	0.567699	0.759075	0.556428	0.619916
1788	0.726714	0.567624	0.758895	0.555831	0.619835
1789	0.726672	0.567586	0.75877	0.555214	0.619746
1790	0.726655	0.567568	0.75868	0.554621	0.619671
1791	0.726614	0.567512	0.758563	0.554036	0.619603
1792	0.726592	0.567452	0.758451	0.553474	0.619533
1793	0.726599	0.567391	0.758337	0.55296	0.619436
1794	0.726602	0.567335	0.758224	0.552461	0.61934
1795	0.726659	0.567302	0.758222	0.552052	0.619326
1796	0.726752	0.567276	0.75827	0.551672	0.61933
1797	0.726863	0.567233	0.758315	0.55139	0.61932
1798	0.726974	0.567175	0.75832	0.551141	0.619301
1799	0.727135	0.567135	0.758374	0.550976	0.619349
1800	0.727349	0.567137	0.758507	0.550919	0.619472
1801	0.727525	0.567133	0.758613	0.550867	0.619571
1802	0.727707	0.56713	0.758712	0.550885	0.619649
1803	0.727895	0.567124	0.758812	0.550917	0.619726
1804	0.728073	0.567054	0.7589	0.551037	0.619796
1805	0.728241	0.566968	0.758982	0.551174	0.619866
1806	0.728426	0.566937	0.759087	0.551337	0.619921
1807	0.728624	0.566939	0.759219	0.55152	0.619985
1808	0.728743	0.566907	0.759295	0.551695	0.62002
1809	0.728809	0.566838	0.759311	0.551905	0.620035
1810	0.728888	0.566782	0.759331	0.552079	0.620059
1811	0.728979	0.56676	0.759352	0.552189	0.620064
1812	0.729061	0.566726	0.759368	0.552281	0.620059
1813	0.72912	0.566663	0.759376	0.552323	0.620057
1814	0.729174	0.566605	0.759393	0.552361	0.620064
1815	0.72917	0.566549	0.75944	0.552368	0.620086
1816	0.729149	0.566483	0.759477	0.552365	0.620098
1817	0.729137	0.566409	0.75953	0.552258	0.620114
1818	0.729143	0.56635	0.759606	0.552105	0.62015
1819	0.729165	0.566296	0.759738	0.552002	0.620199
1820	0.729151	0.566226	0.759886	0.551921	0.620231
1821	0.729125	0.566143	0.760041	0.551849	0.620259
1822	0.729126	0.566061	0.760232	0.551762	0.620306
1823	0.729115	0.565987	0.760414	0.551693	0.620362
1824	0.729057	0.565902	0.760592	0.551679	0.620441
1825	0.729002	0.565814	0.760773	0.551675	0.620519
1826	0.72901	0.565739	0.761018	0.551777	0.620597
1827	0.729024	0.56567	0.761278	0.551901	0.620683
1828	0.728993	0.565564	0.761476	0.552049	0.620749
1829	0.72895	0.565458	0.761662	0.552227	0.620816
1830	0.728916	0.565362	0.761839	0.55244	0.620896
1831	0.728879	0.56527	0.761988	0.552686	0.620977
1832	0.728835	0.565182	0.762116	0.552933	0.621038
1833	0.72878	0.565087	0.762203	0.553201	0.621069
1834	0.728735	0.564981	0.762287	0.553468	0.621095
1835	0.728717	0.564841	0.762386	0.553724	0.621103
1836	0.728701	0.564706	0.762488	0.553985	0.621112
1837	0.728722	0.564619	0.762548	0.554368	0.621108
1838	0.728748	0.564532	0.762584	0.554763	0.621093
1839	0.728806	0.56443	0.762683	0.555223	0.621093
1840	0.72889	0.564327	0.762811	0.5557	0.621108
1841	0.728981	0.564224	0.76296	0.556211	0.621103
1842	0.729068	0.564122	0.763114	0.556768	0.621076
1843	0.729165	0.564005	0.763282	0.557355	0.621032
1844	0.729306	0.563848	0.763507	0.558068	0.620951
1845	0.729452	0.563691	0.763743	0.558782	0.620878
1846	0.729605	0.563543	0.764032	0.559523	0.620843
1847	0.729749	0.563391	0.764314	0.560254	0.620803
1848	0.729824	0.563144	0.76452	0.560912	0.620657
1849	0.729907	0.56289	0.764735	0.561584	0.6205
1850	0.730014	0.562663	0.764989	0.562198	0.620345
1851	0.730112	0.562435	0.765251	0.562785	0.620189
1852	0.7302	0.562196	0.765466	0.563316	0.620015
1853	0.730311	0.561954	0.765677	0.563822	0.619838
1854	0.730394	0.561692	0.765857	0.564282	0.61966
1855	0.730391	0.561377	0.76591	0.56458	0.61941
1856	0.730383	0.561059	0.765955	0.564866	0.619149
1857	0.730328	0.5607	0.765949	0.565073	0.618862
1858	0.730261	0.560336	0.765933	0.565269	0.618577
1859	0.730115	0.559947	0.765866	0.565386	0.618311
1860	0.729972	0.559563	0.765805	0.565492	0.618046
1861	0.729741	0.559098	0.765613	0.565503	0.617748
1862	0.729478	0.558608	0.765357	0.565473	0.617441
1863	0.729143	0.558095	0.765074	0.565406	0.617154
1864	0.72872	0.557538	0.764748	0.565289	0.616874
1865	0.728245	0.556923	0.764385	0.565129	0.616584
1866	0.727666	0.556206	0.763949	0.564893	0.616272
1867	0.727074	0.555494	0.763499	0.564647	0.615976
1868	0.726407	0.554803	0.76298	0.564349	0.615729
1869	0.725731	0.5541	0.762452	0.564045	0.615483
1870	0.724945	0.553236	0.761829	0.563671	0.615246
1871	0.724143	0.552353	0.761197	0.563287	0.615016
1872	0.723302	0.551458	0.760523	0.562813	0.614769
1873	0.722448	0.550559	0.759832	0.562315	0.61453
1874	0.721517	0.549587	0.759047	0.561778	0.614269
1875	0.720525	0.548557	0.758201	0.561201	0.614004
1876	0.719519	0.547498	0.757304	0.560598	0.613705
1877	0.718472	0.546394	0.756326	0.559958	0.613362
1878	0.717389	0.545269	0.755297	0.559297	0.612987
1879	0.716189	0.544023	0.754107	0.558506	0.612503
1880	0.714993	0.542774	0.752908	0.55771	0.612016
1881	0.713778	0.541476	0.751572	0.556875	0.61148
1882	0.712562	0.540181	0.750225	0.556042	0.610941
1883	0.711172	0.538722	0.748648	0.555081	0.610244
1884	0.709745	0.537216	0.747013	0.554088	0.609502
1885	0.70826	0.535669	0.745282	0.55305	0.608716
1886	0.706744	0.534105	0.743476	0.551981	0.607894
1887	0.705136	0.532452	0.741531	0.550818	0.607011
1888	0.703408	0.530673	0.739407	0.549526	0.606042
1889	0.701681	0.528878	0.737255	0.54822	0.605062
1890	0.69991	0.527011	0.735001	0.546875	0.604027
1891	0.698132	0.525137	0.732725	0.545517	0.602981
1892	0.696259	0.523144	0.730226	0.544034	0.601837
1893	0.694374	0.521139	0.727707	0.542538	0.600686
1894	0.692481	0.519141	0.725116	0.540991	0.599518
1895	0.690585	0.517134	0.722508	0.539433	0.59835
1896	0.688701	0.515132	0.719768	0.537835	0.597138
1897	0.686799	0.51311	0.716951	0.536209	0.595897
1898	0.685021	0.511215	0.714197	0.534608	0.594682
1899	0.683311	0.509395	0.711462	0.532998	0.593464
1900	0.681667	0.507645	0.70873	0.531397	0.592221
1901	0.680138	0.506018	0.706005	0.52981	0.590964
1902	0.678661	0.504447	0.703319	0.528251	0.589725
1903	0.677455	0.503132	0.700789	0.526818	0.588549
1904	0.676265	0.501833	0.698266	0.525389	0.587371
1905	0.675319	0.500769	0.695791	0.523993	0.586152
1906	0.674395	0.499724	0.693314	0.522596	0.584928
1907	0.673721	0.498951	0.691094	0.521399	0.583734
1908	0.673117	0.49826	0.68894	0.520254	0.58255
1909	0.672648	0.497729	0.686901	0.519162	0.581362
1910	0.672267	0.49731	0.684929	0.518109	0.580175
1911	0.671984	0.496975	0.683065	0.517117	0.579
1912	0.671853	0.496768	0.681346	0.516206	0.577838
1913	0.671759	0.496595	0.67968	0.515333	0.576673
1914	0.671757	0.496527	0.678138	0.514545	0.575471
1915	0.671747	0.496461	0.676621	0.513765	0.574273
1916	0.671851	0.496525	0.675382	0.513117	0.573141
1917	0.671965	0.496595	0.674155	0.512477	0.572015
1918	0.672182	0.49672	0.673093	0.511922	0.570957
1919	0.672399	0.496849	0.672044	0.511371	0.569896
1920	0.672612	0.496996	0.671144	0.510867	0.568898
1921	0.672839	0.497158	0.670313	0.510395	0.567916
1922	0.673096	0.497352	0.669609	0.509995	0.567018
1923	0.673384	0.497573	0.669001	0.509656	0.566184
1924	0.673678	0.497791	0.668446	0.509321	0.565444
1925	0.67399	0.49801	0.667988	0.508999	0.564828
1926	0.674303	0.498227	0.667558	0.508678	0.564256
1927	0.674615	0.49844	0.667228	0.508367	0.563823
1928	0.674921	0.498645	0.666908	0.508059	0.563409
1929	0.67517	0.498794	0.666712	0.507794	0.563193
1930	0.675416	0.498942	0.666523	0.507531	0.562985
1931	0.675673	0.499125	0.66644	0.507306	0.562991
1932	0.675932	0.499309	0.666374	0.507084	0.563028
1933	0.67621	0.499482	0.666389	0.506897	0.563219
1934	0.676494	0.499652	0.666431	0.506725	0.56348
1935	0.676795	0.499823	0.666549	0.506597	0.563831
1936	0.677107	0.49999	0.666737	0.506506	0.564273
1937	0.677401	0.500156	0.66695	0.50643	0.564734
1938	0.677675	0.500321	0.667213	0.506374	0.565259
1939	0.677949	0.500481	0.667493	0.506312	0.565785
1940	0.678215	0.500626	0.667845	0.506237	0.566332
1941	0.678479	0.500775	0.6682	0.506169	0.566877
1942	0.678762	0.500945	0.668621	0.506192	0.567463
1943	0.679045	0.501116	0.669045	0.506218	0.568051
1944	0.679383	0.50128	0.669541	0.506276	0.56859
1945	0.679729	0.501445	0.670055	0.506342	0.569124
1946	0.680047	0.501621	0.670607	0.506445	0.569612
1947	0.680351	0.501799	0.671173	0.506565	0.570077
1948	0.680667	0.501958	0.671765	0.506705	0.570531
1949	0.68099	0.502102	0.672377	0.506852	0.570971
1950	0.681317	0.502267	0.673008	0.507016	0.571387
1951	0.681647	0.502461	0.673675	0.50721	0.571761
1952	0.681983	0.50267	0.674342	0.507419	0.572133
1953	0.682357	0.502921	0.67501	0.507677	0.572485
1954	0.682731	0.503169	0.675678	0.507935	0.572832
1955	0.683084	0.503405	0.676367	0.508209	0.573112
1956	0.683436	0.503641	0.677057	0.508485	0.57339
1957	0.683828	0.503913	0.677806	0.508832	0.573653
1958	0.68423	0.504195	0.678565	0.509193	0.573919
1959	0.684631	0.50448	0.679283	0.509573	0.574148
1960	0.685023	0.504759	0.679976	0.509955	0.574353
1961	0.68543	0.505064	0.680704	0.51034	0.574545
1962	0.685856	0.505396	0.681468	0.510731	0.574727
1963	0.686282	0.505732	0.682249	0.511146	0.574917
1964	0.68671	0.506069	0.68305	0.511599	0.575109
1965	0.687138	0.506398	0.683838	0.512038	0.575293
1966	0.687563	0.506714	0.684592	0.512442	0.575448
1967	0.687991	0.507034	0.685349	0.512846	0.575614
1968	0.688484	0.507402	0.686141	0.513246	0.575882
1969	0.688977	0.50777	0.686933	0.513646	0.576151
1970	0.689424	0.508118	0.687729	0.51403	0.576405
1971	0.689867	0.508464	0.688527	0.514412	0.57666
1972	0.690319	0.5088	0.689277	0.514781	0.57695
1973	0.690772	0.509133	0.690014	0.515144	0.577252
1974	0.691253	0.509488	0.690801	0.515518	0.577578
1975	0.691746	0.509857	0.691619	0.515896	0.57792
1976	0.692208	0.510216	0.692428	0.516276	0.578261
1977	0.692647	0.510568	0.69323	0.516662	0.578604
1978	0.693107	0.510924	0.694033	0.517041	0.578942
1979	0.693595	0.511273	0.69483	0.517393	0.579263
1980	0.694081	0.511625	0.695624	0.517747	0.579576
1981	0.694562	0.511997	0.696394	0.518101	0.579853
1982	0.695044	0.512371	0.697167	0.518456	0.580131
1983	0.695584	0.512757	0.698006	0.518884	0.580416
1984	0.696127	0.513143	0.698847	0.519315	0.580702
1985	0.696648	0.513533	0.699665	0.519719	0.580989
1986	0.697163	0.513925	0.700483	0.520119	0.581277
1987	0.697659	0.514322	0.701292	0.520482	0.581544
1988	0.698146	0.514721	0.702099	0.520828	0.5818
1989	0.698658	0.515124	0.7029	0.521187	0.582052
1990	0.699191	0.515532	0.703699	0.521557	0.582302
1991	0.699723	0.515955	0.70449	0.521937	0.582562
1992	0.700252	0.516404	0.705267	0.522331	0.582835
1993	0.700789	0.516853	0.706055	0.522723	0.583107
1994	0.701347	0.517302	0.706874	0.52311	0.583376
1995	0.701906	0.517756	0.707691	0.523499	0.583647
1996	0.702459	0.518235	0.708471	0.523905	0.583938
1997	0.703012	0.518715	0.709251	0.524312	0.584229
1998	0.703575	0.519208	0.710023	0.524702	0.584495
1999	0.704139	0.519702	0.710794	0.525092	0.584761
2000	0.704736	0.520256	0.711619	0.525507	0.585065
2001	0.705344	0.520826	0.71246	0.525931	0.585381
2002	0.705911	0.52134	0.713233	0.526308	0.585659
2003	0.706456	0.521826	0.713971	0.526662	0.585917
2004	0.707004	0.522354	0.714714	0.527027	0.586187
2005	0.70756	0.522922	0.715464	0.527401	0.586467
2006	0.708125	0.523481	0.716199	0.527779	0.586751
2007	0.708695	0.524019	0.716901	0.528158	0.58704
2008	0.709262	0.524561	0.717603	0.528525	0.58733
2009	0.709816	0.525106	0.718308	0.528854	0.587633
2010	0.710375	0.525656	0.719013	0.529181	0.587937
2011	0.710988	0.526227	0.719706	0.529466	0.588255
2012	0.711603	0.5268	0.720401	0.529751	0.588573
2013	0.712175	0.52734	0.721066	0.529998	0.588927
2014	0.712746	0.52788	0.721732	0.530243	0.589284
2015	0.71325	0.528397	0.722361	0.530432	0.589582
2016	0.713738	0.528909	0.722982	0.530607	0.589866
2017	0.714292	0.52946	0.723629	0.53078	0.590225
2018	0.714882	0.530034	0.724291	0.530953	0.590624
2019	0.715446	0.530589	0.724925	0.5311	0.59099
2020	0.715983	0.531128	0.725532	0.531223	0.591325
2021	0.716514	0.531662	0.726132	0.531336	0.591661
2022	0.717035	0.532187	0.726717	0.531431	0.591998
2023	0.717544	0.532705	0.727285	0.531501	0.59231
2024	0.718012	0.533196	0.727792	0.531495	0.592538
2025	0.718481	0.533693	0.7283	0.531489	0.592767
2026	0.718951	0.534225	0.7288	0.531488	0.593001
2027	0.719422	0.534758	0.729303	0.531487	0.593236
2028	0.719868	0.535266	0.729817	0.531487	0.593463
2029	0.720315	0.535775	0.730333	0.531487	0.593691
2030	0.720771	0.536253	0.73082	0.531444	0.593934
2031	0.721229	0.536725	0.731302	0.531392	0.594181
2032	0.72165	0.537193	0.731733	0.531313	0.594388
2033	0.722055	0.537659	0.732141	0.531222	0.594578
2034	0.722482	0.538121	0.732557	0.531102	0.594781
2035	0.72293	0.538581	0.732981	0.530962	0.594996
2036	0.723352	0.539035	0.733379	0.530797	0.595219
2037	0.723739	0.53948	0.733742	0.530598	0.595452
2038	0.724119	0.539921	0.734098	0.530382	0.5957
2039	0.724484	0.540352	0.734442	0.530132	0.595983
2040	0.724855	0.540779	0.734782	0.529866	0.596272
2041	0.725245	0.541187	0.735097	0.529521	0.596584
2042	0.725633	0.541596	0.73541	0.529171	0.596898
2043	0.725947	0.541984	0.735695	0.528694	0.597288
2044	0.726263	0.542373	0.735981	0.528215	0.59768
2045	0.726598	0.542721	0.736234	0.527695	0.59806
2046	0.726935	0.543065	0.736483	0.527167	0.59844
2047	0.727316	0.543458	0.736773	0.526605	0.598943
2048	0.72771	0.543868	0.737074	0.526032	0.599485
2049	0.728039	0.54424	0.73731	0.525411	0.599955
2050	0.728329	0.544587	0.73751	0.524763	0.600385
2051	0.728624	0.544931	0.737714	0.524094	0.600834
2052	0.728922	0.545271	0.73792	0.523409	0.6013
2053	0.72922	0.545597	0.738133	0.522751	0.601757
2054	0.72952	0.545908	0.738363	0.522146	0.602206
2055	0.729813	0.546214	0.738576	0.521547	0.602652
2056	0.730078	0.546495	0.738737	0.520974	0.603081
2057	0.730341	0.546778	0.738893	0.520416	0.603508
2058	0.730586	0.547081	0.739024	0.519989	0.603905
2059	0.730833	0.547386	0.739155	0.519565	0.604304
2060	0.731118	0.547675	0.739256	0.519236	0.604686
2061	0.731405	0.547963	0.739356	0.518907	0.605069
2062	0.731575	0.548174	0.739372	0.518578	0.605397
2063	0.731726	0.548377	0.739375	0.518243	0.605718
2064	0.731867	0.548594	0.739361	0.517881	0.606001
2065	0.732007	0.548818	0.739345	0.517508	0.606275
2066	0.732112	0.549017	0.739286	0.517091	0.606524
2067	0.732197	0.549201	0.7392	0.516644	0.606755
2068	0.732281	0.549405	0.739107	0.516149	0.607005
2069	0.732361	0.549624	0.739008	0.515606	0.607271
2070	0.732432	0.54984	0.738918	0.515047	0.607533
2071	0.732485	0.55005	0.738848	0.514471	0.60779
2072	0.732515	0.550253	0.738782	0.513872	0.608043
2073	0.732483	0.550443	0.738726	0.513218	0.608285
2074	0.732448	0.550628	0.738668	0.512571	0.608524
2075	0.732403	0.550781	0.738595	0.511977	0.608725
2076	0.732355	0.550935	0.738524	0.511382	0.608927
2077	0.73225	0.551065	0.738451	0.510774	0.609151
2078	0.732144	0.551196	0.738377	0.510163	0.609377
2079	0.732041	0.551314	0.738272	0.509567	0.609573
2080	0.731938	0.551432	0.738167	0.508967	0.609767
2081	0.731728	0.551532	0.738072	0.508336	0.609953
2082	0.731489	0.551628	0.737978	0.507694	0.610137
2083	0.731202	0.551678	0.737851	0.507029	0.61029
2084	0.730894	0.551706	0.737713	0.506351	0.610428
2085	0.73057	0.551742	0.737587	0.50566	0.610534
2086	0.730225	0.551778	0.737469	0.504957	0.61061
2087	0.729844	0.551796	0.737367	0.50424	0.610681
2088	0.729425	0.551797	0.737292	0.503524	0.610749
2089	0.728996	0.55179	0.737242	0.502824	0.610807
2090	0.728559	0.551771	0.737246	0.50216	0.610841
2091	0.728125	0.551762	0.737284	0.501519	0.61088
2092	0.727702	0.551773	0.737423	0.50096	0.610941
2093	0.727266	0.551775	0.737564	0.5004	0.610988
2094	0.726741	0.551729	0.737736	0.499808	0.610935
2095	0.726214	0.551683	0.73791	0.499216	0.610881
2096	0.725732	0.551686	0.738073	0.49862	0.610843
2097	0.725254	0.551694	0.738233	0.498019	0.610806
2098	0.724745	0.55168	0.738338	0.497268	0.610688
2099	0.724227	0.551657	0.738428	0.496477	0.610551
2100	0.723705	0.551655	0.738437	0.495529	0.610347
2101	0.723181	0.551664	0.738417	0.494523	0.610126
2102	0.722655	0.551667	0.738319	0.493293	0.609894
2103	0.722127	0.551664	0.738176	0.491944	0.609657
2104	0.721625	0.551689	0.737971	0.490524	0.609394
2105	0.721149	0.551736	0.737712	0.489077	0.609109
2106	0.720686	0.551785	0.737396	0.487579	0.608803
2107	0.720238	0.55184	0.737021	0.48606	0.608474
2108	0.719792	0.55189	0.736624	0.4846	0.608116
2109	0.71935	0.551933	0.736224	0.483339	0.607718
2110	0.718918	0.551995	0.735819	0.482133	0.607328
2111	0.718543	0.552111	0.735436	0.481213	0.606977
2112	0.718169	0.552218	0.735064	0.480358	0.606618
2113	0.717796	0.552283	0.73476	0.47993	0.606248
2114	0.717423	0.55235	0.734461	0.479531	0.605878
2115	0.717149	0.552449	0.734267	0.479511	0.60557
2116	0.71688	0.552548	0.734075	0.479498	0.605264
2117	0.716716	0.55264	0.734014	0.479671	0.605068
2118	0.716557	0.55273	0.733959	0.479826	0.604881
2119	0.716442	0.552818	0.733934	0.479938	0.604768
2120	0.716342	0.552909	0.73391	0.480002	0.604676
2121	0.716315	0.553	0.733852	0.479877	0.604667
2122	0.716309	0.553085	0.733766	0.479636	0.604689
2123	0.71631	0.553181	0.733614	0.47905	0.604752
2124	0.716308	0.553286	0.733411	0.478225	0.604835
2125	0.716302	0.553336	0.733148	0.477109	0.604949
2126	0.716282	0.553327	0.732816	0.475719	0.605079
2127	0.716227	0.553298	0.732374	0.474043	0.60522
2128	0.716115	0.553248	0.731761	0.471973	0.605375
2129	0.716016	0.553194	0.731106	0.469781	0.605528
2130	0.715923	0.553113	0.730341	0.467371	0.605646
2131	0.715804	0.553016	0.729495	0.464855	0.605756
2132	0.715593	0.552883	0.728337	0.462059	0.605849
2133	0.715367	0.552739	0.72714	0.459222	0.605937
2134	0.714936	0.552466	0.72561	0.456252	0.605933
2135	0.714497	0.552188	0.724057	0.453253	0.605924
2136	0.713899	0.551827	0.722071	0.450046	0.605805
2137	0.713289	0.55146	0.720055	0.446821	0.605681
2138	0.712516	0.550999	0.71769	0.44369	0.605531
2139	0.711736	0.550536	0.715294	0.440579	0.605388
2140	0.710783	0.54999	0.71248	0.437487	0.605199
2141	0.709771	0.549417	0.709557	0.434391	0.604994
2142	0.708563	0.54879	0.706365	0.431498	0.604721
2143	0.707285	0.548141	0.70308	0.428681	0.604418
2144	0.705853	0.547414	0.699461	0.425874	0.604133
2145	0.704322	0.54664	0.695673	0.423063	0.603864
2146	0.702626	0.545766	0.691813	0.420316	0.603498
2147	0.700793	0.544798	0.687931	0.417584	0.60305
2148	0.698815	0.543738	0.683986	0.41478	0.602558
2149	0.69665	0.542563	0.680012	0.411837	0.602
2150	0.69443	0.54136	0.676117	0.408841	0.601444
2151	0.69212	0.5401	0.672443	0.405694	0.600892
2152	0.689658	0.538756	0.668792	0.402384	0.600288
2153	0.686795	0.53718	0.665278	0.398573	0.599542
2154	0.68387	0.535555	0.661836	0.394669	0.598774
2155	0.68077	0.533773	0.65888	0.390421	0.597964
2156	0.677633	0.531962	0.655963	0.386091	0.597151
2157	0.674173	0.529898	0.653543	0.381142	0.596244
2158	0.670685	0.527815	0.651145	0.37614	0.595326
2159	0.667048	0.525629	0.649327	0.370914	0.59436
2160	0.66339	0.523432	0.647539	0.365669	0.593393
2161	0.659252	0.520978	0.646206	0.360062	0.592316
2162	0.655047	0.518496	0.644905	0.354439	0.591219
2163	0.650798	0.515995	0.644088	0.349078	0.59009
2164	0.646539	0.513496	0.643359	0.343806	0.58896
2165	0.642031	0.510928	0.642947	0.338737	0.587777
2166	0.637427	0.508346	0.642621	0.333771	0.58657
2167	0.632718	0.505896	0.642536	0.32932	0.585403
2168	0.627953	0.503522	0.64255	0.325142	0.584256
2169	0.622876	0.501092	0.642677	0.321201	0.582988
2170	0.617557	0.498634	0.642859	0.317445	0.581635
2171	0.612228	0.496316	0.6431	0.314133	0.58029
2172	0.606907	0.49415	0.643371	0.311269	0.578941
2173	0.601405	0.492036	0.643643	0.308682	0.577528
2174	0.595659	0.49002	0.643896	0.306519	0.576032
2175	0.589907	0.488099	0.644114	0.30464	0.574528
2176	0.58418	0.486339	0.644222	0.30337	0.572984
2177	0.578329	0.484596	0.644285	0.30229	0.571373
2178	0.572188	0.482924	0.644139	0.301885	0.569549
2179	0.566048	0.481289	0.643954	0.301662	0.567711
2180	0.560163	0.479846	0.643568	0.302346	0.565809
2181	0.554241	0.47842	0.643148	0.303143	0.563873
2182	0.548361	0.477185	0.642326	0.304847	0.561631
2183	0.542476	0.475958	0.641479	0.306629	0.55937
2184	0.537072	0.474907	0.640388	0.309047	0.556896
2185	0.531673	0.47386	0.639273	0.31151	0.554389
2186	0.526465	0.47293	0.637818	0.314492	0.551435
2187	0.521271	0.472007	0.636337	0.317479	0.548413
2188	0.516759	0.471218	0.634704	0.320282	0.545135
2189	0.512348	0.470445	0.63306	0.322978	0.541798
2190	0.508386	0.469755	0.63127	0.325234	0.538048
2191	0.504549	0.469084	0.629445	0.327275	0.534166
2192	0.501339	0.4685	0.62762	0.328466	0.530075
2193	0.498382	0.467935	0.625773	0.32922	0.525895
2194	0.495903	0.467441	0.623694	0.328898	0.521396
2195	0.493704	0.466991	0.621435	0.327874	0.516741
2196	0.49204	0.466579	0.619009	0.325817	0.51213
2197	0.49079	0.466194	0.616386	0.322976	0.507615
2198	0.48995	0.465841	0.613443	0.319316	0.503107
2199	0.489539	0.465529	0.610142	0.314949	0.4987
2200	0.489519	0.465292	0.606677	0.310181	0.494594
2201	0.490047	0.465168	0.603123	0.30522	0.491046
2202	0.490936	0.465088	0.599468	0.300169	0.487749
2203	0.492522	0.465111	0.595967	0.295491	0.485106
2204	0.494357	0.465174	0.592669	0.291172	0.482826
2205	0.496794	0.465351	0.5904	0.288371	0.481566
2206	0.499437	0.465579	0.588404	0.286003	0.480584
2207	0.50277	0.466012	0.58805	0.28577	0.480656
2208	0.506234	0.466477	0.588014	0.285959	0.480931
2209	0.510265	0.467095	0.590151	0.288474	0.482214
2210	0.51441	0.467746	0.59257	0.291305	0.483633
2211	0.519287	0.468631	0.597342	0.296525	0.485984
2212	0.524227	0.469533	0.60233	0.301945	0.488417
2213	0.529343	0.4705	0.608718	0.308649	0.491227
2214	0.534485	0.471472	0.615176	0.315418	0.494048
2215	0.539896	0.472465	0.622482	0.323012	0.497005
2216	0.545336	0.473452	0.629772	0.330615	0.499943
2217	0.550587	0.47431	0.636618	0.338063	0.502535
2218	0.555801	0.475144	0.643298	0.345436	0.505042
2219	0.560963	0.475841	0.649371	0.352617	0.507107
2220	0.566115	0.4765	0.655252	0.359747	0.509036
2221	0.570881	0.477012	0.659974	0.366177	0.510273
2222	0.575517	0.477477	0.664334	0.372385	0.511262
2223	0.579983	0.477798	0.667916	0.378195	0.511596
2224	0.584378	0.478043	0.671193	0.383839	0.511602
2225	0.588404	0.478137	0.673701	0.388863	0.51091
2226	0.592212	0.478148	0.67579	0.393514	0.509794
2227	0.595834	0.477997	0.677411	0.397844	0.507948
2228	0.599332	0.47773	0.678735	0.401924	0.505513
2229	0.602565	0.477388	0.679751	0.40552	0.502534
2230	0.605532	0.47697	0.680489	0.408648	0.499045
2231	0.608337	0.47647	0.681032	0.411441	0.495059
2232	0.610946	0.47589	0.681371	0.413817	0.490526
2233	0.613407	0.475273	0.68156	0.415903	0.485763
2234	0.615635	0.474612	0.681532	0.417541	0.480801
2235	0.617777	0.473924	0.681439	0.418965	0.475645
2236	0.619752	0.473208	0.68128	0.419964	0.470348
2237	0.621615	0.472483	0.681088	0.420773	0.465158
2238	0.623197	0.471787	0.680831	0.421095	0.46056
2239	0.62475	0.471114	0.680564	0.421309	0.456108
2240	0.626171	0.470547	0.680287	0.421157	0.452509
2241	0.627579	0.470006	0.680002	0.420919	0.449127
2242	0.628942	0.469656	0.679745	0.420313	0.447053
2243	0.6303	0.469309	0.679492	0.419646	0.445116
2244	0.631525	0.469038	0.679259	0.418559	0.44442
2245	0.632745	0.46878	0.679032	0.417434	0.443844
2246	0.633834	0.468672	0.678823	0.41612	0.444529
2247	0.63493	0.468572	0.678612	0.414784	0.445291
2248	0.636027	0.468648	0.678475	0.413335	0.447039
2249	0.637132	0.468734	0.678342	0.411874	0.448839
2250	0.638108	0.4689	0.678101	0.410452	0.45122
2251	0.639083	0.469069	0.677843	0.409033	0.453635
2252	0.640077	0.469391	0.677651	0.407718	0.456691
2253	0.641076	0.469727	0.677461	0.406416	0.459823
2254	0.641942	0.469999	0.677184	0.405291	0.463082
2255	0.642791	0.47026	0.67689	0.404196	0.466367
2256	0.643666	0.47062	0.67663	0.40346	0.469884
2257	0.644559	0.47101	0.676383	0.402817	0.473487
2258	0.645294	0.471424	0.676036	0.402402	0.477039
2259	0.645977	0.471843	0.675643	0.40205	0.480581
2260	0.646648	0.472268	0.675209	0.401906	0.484287
2261	0.647323	0.472705	0.674761	0.401844	0.48809
2262	0.647907	0.473081	0.674291	0.401937	0.49174
2263	0.648437	0.47342	0.673804	0.40209	0.495307
2264	0.648865	0.473746	0.673215	0.402302	0.498769
2265	0.649236	0.47407	0.672566	0.402531	0.502168
2266	0.649599	0.474396	0.671963	0.402745	0.505392
2267	0.649958	0.474728	0.671393	0.402933	0.508483
2268	0.650222	0.475048	0.670773	0.403014	0.511494
2269	0.650389	0.475339	0.670096	0.40297	0.514407
2270	0.650471	0.475614	0.669367	0.40281	0.517019
2271	0.650464	0.475888	0.668595	0.402528	0.519303
2272	0.650402	0.476111	0.667801	0.402083	0.521377
2273	0.650267	0.476262	0.666976	0.401418	0.523158
2274	0.650063	0.476435	0.666163	0.400657	0.524706
2275	0.649759	0.476642	0.665384	0.399758	0.525883
2276	0.649386	0.47682	0.664593	0.398736	0.526844
2277	0.648896	0.476945	0.663799	0.397505	0.527397
2278	0.64836	0.477033	0.662995	0.396151	0.527724
2279	0.647742	0.477044	0.662183	0.394569	0.527568
2280	0.647093	0.477054	0.661399	0.392917	0.527229
2281	0.646374	0.477055	0.660702	0.391103	0.526421
2282	0.645599	0.477041	0.659986	0.389215	0.525431
2283	0.64468	0.476984	0.659226	0.387164	0.523912
2284	0.643753	0.476919	0.658506	0.385049	0.522282
2285	0.64284	0.476836	0.657981	0.382771	0.520309
2286	0.6419	0.476735	0.657451	0.380455	0.518224
2287	0.640891	0.476548	0.656926	0.378115	0.515724
2288	0.639862	0.476348	0.656395	0.375737	0.513135
2289	0.638763	0.47605	0.655847	0.373324	0.51023
2290	0.637656	0.475744	0.655299	0.370895	0.507276
2291	0.636604	0.475412	0.6548	0.368632	0.504272
2292	0.635528	0.475072	0.654303	0.366343	0.501214
2293	0.634304	0.474673	0.653898	0.364167	0.498025
2294	0.633063	0.47427	0.653489	0.361973	0.494793
2295	0.631928	0.473957	0.653124	0.360248	0.491884
2296	0.630775	0.473638	0.652754	0.358502	0.488932
2297	0.629567	0.473161	0.652299	0.357029	0.486172
2298	0.62834	0.472676	0.651838	0.355538	0.483376
2299	0.627141	0.472211	0.651289	0.354478	0.481214
2300	0.625923	0.47174	0.650727	0.353416	0.479044
2301	0.624691	0.471181	0.650124	0.352671	0.477189
2302	0.62344	0.470609	0.649508	0.351936	0.47533
2303	0.622227	0.469989	0.648873	0.351496	0.474157
2304	0.621003	0.469357	0.648228	0.351078	0.473038
2305	0.619688	0.468675	0.64742	0.350834	0.472399
2306	0.618346	0.467978	0.64658	0.350611	0.471817
2307	0.617051	0.467289	0.645742	0.350627	0.4718
2308	0.615751	0.466594	0.644896	0.350685	0.471879
2309	0.614368	0.465758	0.643979	0.350817	0.472189
2310	0.612955	0.464883	0.643038	0.350966	0.472549
2311	0.611629	0.464038	0.642209	0.35116	0.473186
2312	0.610314	0.463193	0.641402	0.351366	0.473895
2313	0.609003	0.462268	0.640733	0.351617	0.474652
2314	0.607683	0.461314	0.640097	0.351883	0.47543
2315	0.606442	0.460377	0.639512	0.352093	0.476146
2316	0.605219	0.459438	0.638942	0.352288	0.476847
2317	0.603985	0.458371	0.638483	0.352436	0.477471
2318	0.602742	0.457249	0.638061	0.352568	0.478074
2319	0.601558	0.456172	0.637708	0.352588	0.478493
2320	0.600391	0.455107	0.637382	0.352561	0.478834
2321	0.599297	0.454094	0.637178	0.352454	0.479116
2322	0.598229	0.453096	0.637029	0.352312	0.479375
2323	0.597202	0.452102	0.636948	0.352105	0.479421
2324	0.596198	0.451104	0.636901	0.351861	0.479357
2325	0.595254	0.450175	0.637119	0.35168	0.479338
2326	0.594333	0.449276	0.637483	0.351526	0.47934
2327	0.593429	0.448407	0.637824	0.351366	0.479247
2328	0.592535	0.447555	0.638159	0.351205	0.479099
2329	0.591654	0.446763	0.63854	0.351005	0.478884
2330	0.590774	0.445999	0.638949	0.350783	0.47862
2331	0.589932	0.44529	0.639437	0.350533	0.478293
2332	0.589122	0.444621	0.639995	0.350266	0.477928
2333	0.588333	0.443989	0.640524	0.349909	0.477453
2334	0.587548	0.443389	0.641051	0.349499	0.476891
2335	0.586755	0.442819	0.641465	0.348948	0.476285
2336	0.585948	0.442262	0.641785	0.348287	0.475644
2337	0.585051	0.441803	0.642004	0.347453	0.474834
2338	0.584076	0.441431	0.642143	0.346471	0.473875
2339	0.583237	0.441106	0.642178	0.345377	0.472881
2340	0.582518	0.440826	0.642135	0.344173	0.471859
2341	0.581722	0.440524	0.641936	0.342814	0.470588
2342	0.580857	0.440198	0.641577	0.341299	0.469101
2343	0.580081	0.439961	0.641155	0.339747	0.467471
2344	0.579392	0.439808	0.640655	0.338124	0.465691
2345	0.578694	0.439719	0.640067	0.336543	0.463719
2346	0.577965	0.43969	0.639378	0.334977	0.461546
2347	0.577257	0.439635	0.638685	0.333493	0.459216
[truncated: 153 more rows]

## Sheet: Table S5
Table S5. VNIR-SWIR reflectance spectra corresponding to mechanic mixtures of illite-sudoite reference minerals from the Athabasca Basin Mineral Standards database
Wavelength	I-C 20:80	I-C 40:60	I-C 80:20
350	0.114146	0.129222	0.125132
351	0.114294	0.130651	0.127411
352	0.114194	0.130886	0.129337
353	0.130418	0.142146	0.149875
354	0.13696	0.148895	0.155772
355	0.141272	0.155951	0.157655
356	0.152772	0.170504	0.168451
357	0.163694	0.184212	0.184076
358	0.170545	0.191663	0.194816
359	0.17092	0.189153	0.195525
360	0.175281	0.192105	0.200294
361	0.181692	0.199482	0.203506
362	0.189324	0.209919	0.205129
363	0.189749	0.207906	0.209624
364	0.193403	0.209559	0.215912
365	0.200389	0.215029	0.224567
366	0.213867	0.227966	0.239004
367	0.21165	0.228645	0.236937
368	0.207763	0.227099	0.233247
369	0.209548	0.22825	0.235771
370	0.21998	0.235223	0.243353
371	0.224645	0.239507	0.247899
372	0.222361	0.240345	0.248707
373	0.225221	0.243037	0.250673
374	0.226821	0.245265	0.252535
375	0.227232	0.245736	0.253542
376	0.225663	0.238938	0.250651
377	0.225728	0.239968	0.253252
378	0.227949	0.243877	0.256975
379	0.233732	0.248306	0.259147
380	0.232947	0.24897	0.259102
381	0.232618	0.248963	0.259235
382	0.233998	0.248842	0.259973
383	0.236762	0.251333	0.263282
384	0.238069	0.253274	0.264555
385	0.238643	0.254781	0.264783
386	0.240984	0.256081	0.267378
387	0.244054	0.258368	0.27056
388	0.246016	0.260111	0.272484
389	0.244499	0.259533	0.270691
390	0.245005	0.261227	0.273428
391	0.246662	0.263087	0.276498
392	0.2494	0.264618	0.278902
393	0.249349	0.264455	0.277503
394	0.251211	0.266274	0.279214
395	0.254299	0.269335	0.282987
396	0.254446	0.269419	0.282672
397	0.254412	0.268666	0.281434
398	0.254631	0.268352	0.280793
399	0.255891	0.270536	0.283229
400	0.257544	0.272241	0.285104
401	0.258442	0.273419	0.286126
402	0.258016	0.273978	0.28604
403	0.25959	0.274652	0.287898
404	0.260636	0.275306	0.28924
405	0.261004	0.275871	0.289885
406	0.260558	0.275536	0.289221
407	0.261397	0.276021	0.290048
408	0.262741	0.276897	0.291566
409	0.263432	0.277624	0.292744
410	0.263535	0.278662	0.293307
411	0.263998	0.279792	0.293929
412	0.265465	0.280955	0.295018
413	0.265626	0.281283	0.295187
414	0.265791	0.28153	0.295451
415	0.266153	0.281833	0.295975
416	0.267826	0.283653	0.298043
417	0.2687	0.284757	0.299133
418	0.269121	0.285327	0.299586
419	0.269765	0.285459	0.299897
420	0.270857	0.286212	0.300603
421	0.271668	0.286988	0.301128
422	0.271531	0.287348	0.300964
423	0.272559	0.288403	0.302408
424	0.273886	0.289861	0.304168
425	0.275363	0.291696	0.306018
426	0.275916	0.292503	0.30614
427	0.276793	0.293277	0.306591
428	0.277907	0.294031	0.307328
429	0.279005	0.294828	0.308343
430	0.279704	0.295593	0.308972
431	0.280296	0.296473	0.30962
432	0.281057	0.297725	0.310774
433	0.282945	0.299386	0.312469
434	0.284641	0.300768	0.313883
435	0.285747	0.301638	0.314746
436	0.286839	0.302625	0.315664
437	0.287624	0.303611	0.316454
438	0.288194	0.304568	0.317142
439	0.289189	0.305322	0.31793
440	0.289937	0.306117	0.318613
441	0.290633	0.307027	0.319333
442	0.291574	0.308258	0.320362
443	0.292224	0.308933	0.320907
444	0.292936	0.309611	0.321499
445	0.293882	0.310531	0.322376
446	0.295085	0.311616	0.323479
447	0.296107	0.312586	0.324484
448	0.296919	0.313426	0.325348
449	0.297448	0.314195	0.32576
450	0.298496	0.315335	0.326616
451	0.2997	0.316498	0.3276
452	0.300389	0.316954	0.32812
453	0.301348	0.317798	0.329108
454	0.302388	0.318806	0.330283
455	0.303432	0.319914	0.331557
456	0.303763	0.320129	0.331846
457	0.304343	0.320632	0.332296
458	0.305289	0.321576	0.333054
459	0.30619	0.32279	0.334005
460	0.306706	0.323247	0.334677
461	0.307042	0.323355	0.335155
462	0.307729	0.324165	0.335574
463	0.30844	0.32496	0.33635
464	0.30909	0.325682	0.337166
465	0.309587	0.326261	0.337798
466	0.310181	0.32685	0.338452
467	0.31064	0.327326	0.339095
468	0.310911	0.32766	0.339722
469	0.311321	0.328034	0.340245
470	0.311921	0.32869	0.340846
471	0.312603	0.329476	0.341495
472	0.3129	0.329773	0.342089
473	0.313143	0.330178	0.342475
474	0.313464	0.330628	0.342891
475	0.314061	0.331092	0.343626
476	0.314635	0.331692	0.344148
477	0.315095	0.332222	0.344653
478	0.3154	0.33262	0.345197
479	0.316133	0.333461	0.346058
480	0.316701	0.334127	0.346759
481	0.317134	0.334657	0.347323
482	0.317738	0.335394	0.347955
483	0.318636	0.336128	0.34887
484	0.319547	0.336831	0.349778
485	0.320071	0.33746	0.35025
486	0.320695	0.33824	0.350952
487	0.321498	0.339063	0.351738
488	0.322573	0.339909	0.352585
489	0.323391	0.340721	0.353352
490	0.324131	0.341502	0.354044
491	0.324832	0.342269	0.354687
492	0.325774	0.343238	0.355568
493	0.326523	0.343946	0.356256
494	0.327172	0.34454	0.356843
495	0.327871	0.345275	0.357476
496	0.3288	0.346213	0.358267
497	0.32973	0.347146	0.359069
498	0.330542	0.347966	0.359812
499	0.331305	0.348858	0.360566
500	0.332118	0.349759	0.361332
501	0.332994	0.350664	0.36211
502	0.333897	0.351559	0.362897
503	0.334681	0.352393	0.363655
504	0.335402	0.353195	0.364396
505	0.336214	0.35406	0.365165
506	0.337052	0.354878	0.365909
507	0.337844	0.35567	0.366618
508	0.33853	0.356453	0.367288
509	0.339449	0.357383	0.368151
510	0.340288	0.358253	0.368978
511	0.340984	0.359023	0.369723
512	0.341753	0.359809	0.37036
513	0.342625	0.36072	0.371194
514	0.343561	0.361709	0.372143
515	0.344438	0.362616	0.372909
516	0.345292	0.363493	0.373678
517	0.34614	0.364377	0.374466
518	0.347013	0.365329	0.375325
519	0.347842	0.366206	0.376059
520	0.34867	0.367075	0.376817
521	0.349518	0.367961	0.377652
522	0.350345	0.368795	0.378438
523	0.351105	0.369545	0.379111
524	0.35181	0.370243	0.379699
525	0.352516	0.371096	0.380377
526	0.353339	0.371953	0.381149
527	0.354203	0.3728	0.381955
528	0.355029	0.373619	0.382729
529	0.355943	0.374548	0.383544
530	0.356873	0.375517	0.384364
531	0.357803	0.376517	0.385182
532	0.358675	0.377453	0.385946
533	0.359576	0.378388	0.386694
534	0.360514	0.379326	0.387442
535	0.361528	0.380249	0.388369
536	0.362513	0.381202	0.389253
537	0.363527	0.3822	0.390137
538	0.364731	0.383327	0.391124
539	0.365971	0.384501	0.3922
540	0.367236	0.385685	0.39331
541	0.368539	0.386871	0.394441
542	0.369942	0.388181	0.39568
543	0.371284	0.389446	0.396817
544	0.372534	0.390635	0.397818
545	0.373399	0.391529	0.398573
546	0.374199	0.392328	0.399206
547	0.374945	0.393061	0.399746
548	0.375637	0.393775	0.400231
549	0.376326	0.394552	0.400759
550	0.377112	0.395414	0.401378
551	0.378125	0.396422	0.402175
552	0.379162	0.397394	0.402961
553	0.380168	0.398373	0.403761
554	0.381133	0.399371	0.404582
555	0.382147	0.400385	0.405428
556	0.383185	0.401445	0.406256
557	0.384245	0.402545	0.407079
558	0.385338	0.403689	0.407967
559	0.386493	0.404862	0.408878
560	0.38766	0.406025	0.409802
561	0.388796	0.407136	0.410741
562	0.390021	0.408374	0.411744
563	0.391212	0.409596	0.412715
564	0.392329	0.410758	0.413624
565	0.393414	0.411905	0.414534
566	0.394421	0.412978	0.415393
567	0.395346	0.413978	0.416197
568	0.396127	0.414888	0.416912
569	0.396816	0.415779	0.417596
570	0.397465	0.416661	0.41827
571	0.398135	0.417544	0.41896
572	0.398895	0.418522	0.419716
573	0.399786	0.419565	0.420523
574	0.400862	0.420677	0.421388
575	0.402151	0.421918	0.422447
576	0.403477	0.423229	0.423555
577	0.40481	0.424585	0.424682
578	0.405975	0.425733	0.425619
579	0.407125	0.426899	0.42659
580	0.408246	0.428051	0.427552
581	0.409289	0.42911	0.428402
582	0.410106	0.43003	0.429116
583	0.410844	0.430888	0.429806
584	0.411561	0.431707	0.430531
585	0.412429	0.432689	0.431374
586	0.41342	0.433719	0.432267
587	0.414533	0.434784	0.433203
588	0.415705	0.43586	0.434194
589	0.416954	0.436993	0.435238
590	0.418221	0.438126	0.43628
591	0.41933	0.439073	0.437134
592	0.420526	0.440152	0.43813
593	0.421708	0.441242	0.439139
594	0.422786	0.442247	0.440065
595	0.423902	0.443191	0.44094
596	0.42505	0.444137	0.441826
597	0.426237	0.445099	0.442735
598	0.427227	0.446072	0.443598
599	0.428114	0.446937	0.444363
600	0.428924	0.447728	0.445071
601	0.429749	0.448563	0.445889
602	0.430514	0.449311	0.446625
603	0.431278	0.450047	0.447366
604	0.432113	0.450851	0.448215
605	0.432905	0.451609	0.448986
606	0.433695	0.452373	0.449726
607	0.434496	0.453158	0.450443
608	0.435229	0.453874	0.451165
609	0.436022	0.454652	0.451923
610	0.436858	0.455475	0.452696
611	0.437583	0.456188	0.453321
612	0.437944	0.456638	0.453669
613	0.438085	0.456934	0.453845
614	0.438096	0.457153	0.453912
615	0.438324	0.457502	0.454149
616	0.438647	0.457885	0.454469
617	0.439039	0.45827	0.454859
618	0.439529	0.458768	0.455288
619	0.44004	0.45927	0.455727
620	0.440562	0.45976	0.456171
621	0.441021	0.460163	0.456633
622	0.441369	0.460541	0.457063
623	0.441645	0.460918	0.457476
624	0.441899	0.461351	0.457899
625	0.442112	0.461748	0.458264
626	0.442303	0.462131	0.458616
627	0.442476	0.46251	0.458975
628	0.442705	0.462963	0.459336
629	0.442935	0.463438	0.459721
630	0.443166	0.463928	0.460132
631	0.44359	0.464448	0.460614
632	0.44396	0.464918	0.461043
633	0.444303	0.465352	0.461438
634	0.444692	0.465791	0.461841
635	0.445157	0.466269	0.462288
636	0.445589	0.46672	0.462718
637	0.445891	0.467087	0.463081
638	0.446291	0.467512	0.46355
639	0.446734	0.467924	0.464044
640	0.44721	0.468308	0.464549
641	0.447692	0.468711	0.465016
642	0.448231	0.469131	0.465519
643	0.448802	0.469561	0.466047
644	0.44933	0.470001	0.466605
645	0.449837	0.470409	0.467154
646	0.450322	0.47081	0.467686
647	0.450783	0.471237	0.468192
648	0.451252	0.471638	0.468708
649	0.451727	0.472075	0.469228
650	0.452212	0.472573	0.469753
651	0.452676	0.473017	0.470304
652	0.453141	0.473492	0.470831
653	0.453601	0.473992	0.471337
654	0.454006	0.474439	0.471861
655	0.454499	0.474964	0.472396
656	0.455006	0.475497	0.472916
657	0.455426	0.475944	0.473377
658	0.455917	0.476419	0.473909
659	0.456402	0.476914	0.474452
660	0.456847	0.477435	0.474987
661	0.457349	0.477895	0.475498
662	0.457849	0.478411	0.476036
663	0.458348	0.478984	0.476598
664	0.458874	0.479514	0.477136
665	0.45941	0.480047	0.477696
666	0.459939	0.480585	0.478269
667	0.460418	0.481144	0.478844
668	0.460971	0.481701	0.479428
669	0.461543	0.482261	0.480011
670	0.462115	0.482828	0.480593
671	0.46268	0.483383	0.481195
672	0.46326	0.483951	0.481792
673	0.463856	0.484536	0.482383
674	0.464418	0.485099	0.483006
675	0.464935	0.485648	0.483576
676	0.465437	0.4862	0.484129
677	0.466015	0.486827	0.484771
678	0.466571	0.487429	0.485387
679	0.467132	0.488004	0.485978
680	0.467727	0.488541	0.486532
681	0.468293	0.489171	0.48717
682	0.468857	0.489762	0.487783
683	0.469425	0.490287	0.488347
684	0.469966	0.490829	0.488868
685	0.470536	0.491414	0.489438
686	0.471121	0.492022	0.490037
687	0.471661	0.492578	0.490602
688	0.472246	0.493162	0.49121
689	0.472833	0.493759	0.491828
690	0.47338	0.494364	0.492426
691	0.474019	0.494997	0.49305
692	0.47465	0.495613	0.493677
693	0.475243	0.496199	0.4943
694	0.475794	0.496741	0.49487
695	0.47635	0.497292	0.495452
696	0.476919	0.497856	0.496048
697	0.477551	0.498466	0.496668
698	0.478128	0.499056	0.49728
699	0.478662	0.499636	0.497882
700	0.479148	0.500215	0.498461
701	0.479718	0.500794	0.49907
702	0.480285	0.501381	0.499664
703	0.480815	0.501983	0.500224
704	0.481409	0.502618	0.500914
705	0.48198	0.503203	0.501541
706	0.48252	0.503738	0.5021
707	0.483009	0.50433	0.502702
708	0.48347	0.50486	0.503268
709	0.48393	0.505363	0.503797
710	0.484454	0.505903	0.504269
711	0.484947	0.506438	0.504807
712	0.485441	0.506954	0.505339
713	0.485955	0.507441	0.505823
714	0.48643	0.507934	0.506326
715	0.486905	0.508444	0.506845
716	0.487381	0.508972	0.507379
717	0.487813	0.509467	0.507892
718	0.488223	0.509931	0.508391
719	0.48864	0.510389	0.508888
720	0.489157	0.51092	0.509421
721	0.489623	0.511398	0.509973
722	0.490066	0.51186	0.510512
723	0.490498	0.512331	0.511008
724	0.490956	0.512799	0.511531
725	0.491388	0.513233	0.51204
726	0.491783	0.513623	0.512526
727	0.492265	0.514087	0.513008
728	0.492692	0.514558	0.513519
729	0.493068	0.515021	0.514038
730	0.49339	0.515384	0.514468
731	0.493642	0.515719	0.514839
732	0.493859	0.516047	0.515192
733	0.494066	0.516387	0.515557
734	0.494207	0.516651	0.515895
735	0.494362	0.516917	0.516221
736	0.494554	0.517207	0.51654
737	0.49486	0.51754	0.516886
738	0.49522	0.517932	0.517324
739	0.495617	0.518371	0.517834
740	0.495951	0.518788	0.518316
741	0.496279	0.519223	0.518773
742	0.496634	0.519678	0.519239
743	0.497088	0.520168	0.519769
744	0.497475	0.520569	0.520268
745	0.497829	0.520949	0.520733
746	0.498154	0.52133	0.521154
747	0.498491	0.521686	0.521592
748	0.498891	0.522082	0.52204
749	0.499348	0.522516	0.522502
750	0.49976	0.522885	0.523021
751	0.500189	0.523297	0.523557
752	0.500641	0.523747	0.524099
753	0.501145	0.524249	0.524635
754	0.501575	0.524659	0.5251
755	0.501986	0.525058	0.525573
756	0.502403	0.525492	0.526103
757	0.502807	0.525883	0.52662
758	0.503211	0.526299	0.527157
759	0.503612	0.526745	0.527716
760	0.50391	0.527146	0.528168
761	0.50426	0.527547	0.528675
762	0.504629	0.52793	0.529196
763	0.504912	0.528221	0.529602
764	0.505203	0.528529	0.530016
765	0.505504	0.528864	0.530439
766	0.505824	0.52925	0.530877
767	0.506115	0.529645	0.531361
768	0.506392	0.530002	0.531826
769	0.506655	0.530308	0.532259
770	0.506951	0.530554	0.532612
771	0.507211	0.530823	0.532967
772	0.507447	0.531119	0.533336
773	0.507712	0.531471	0.533782
774	0.507925	0.531725	0.534181
775	0.508103	0.531948	0.534557
776	0.508247	0.532202	0.534925
777	0.50839	0.53239	0.535215
778	0.508542	0.532602	0.535544
779	0.508711	0.532869	0.535952
780	0.508784	0.533012	0.536207
781	0.508936	0.533204	0.536511
782	0.509144	0.533433	0.536854
783	0.509226	0.533567	0.537139
784	0.50926	0.533718	0.537413
785	0.509289	0.533877	0.537688
786	0.509378	0.534036	0.537984
787	0.509526	0.534234	0.538349
788	0.509633	0.534382	0.538665
789	0.509642	0.534423	0.538866
790	0.509654	0.534532	0.539102
791	0.509745	0.534689	0.539397
792	0.509909	0.534887	0.539742
793	0.509971	0.535046	0.539985
794	0.510034	0.535155	0.540232
795	0.510101	0.535255	0.540492
796	0.510187	0.535425	0.540796
797	0.510278	0.535557	0.541113
798	0.510373	0.535723	0.541446
799	0.510478	0.535979	0.541801
800	0.5106	0.53618	0.542158
801	0.510694	0.536323	0.542493
802	0.510753	0.536409	0.542802
803	0.510829	0.536537	0.54308
804	0.51078	0.536587	0.54324
805	0.510654	0.536599	0.543347
806	0.510577	0.536687	0.543578
807	0.510692	0.536844	0.54389
808	0.510919	0.537058	0.544259
809	0.511251	0.53735	0.544694
810	0.511597	0.537712	0.545178
811	0.511933	0.538074	0.545644
812	0.512254	0.538421	0.546079
813	0.512551	0.538706	0.546507
814	0.512778	0.538953	0.546891
815	0.512954	0.539167	0.547246
816	0.51315	0.539364	0.547625
817	0.513346	0.539594	0.547942
818	0.513537	0.539819	0.548244
819	0.513715	0.539988	0.548575
820	0.513909	0.540149	0.548938
821	0.514092	0.540296	0.549291
822	0.514254	0.540426	0.549619
823	0.514391	0.540572	0.549915
824	0.514498	0.540753	0.550206
825	0.514581	0.540961	0.550493
826	0.514681	0.541151	0.5508
827	0.514835	0.541325	0.551163
828	0.515	0.541475	0.551528
829	0.515107	0.541573	0.551804
830	0.515199	0.541718	0.552098
831	0.51531	0.541886	0.552394
832	0.515463	0.542075	0.552688
833	0.515628	0.542241	0.553037
834	0.515799	0.542423	0.553395
835	0.515979	0.542622	0.55376
836	0.516199	0.542835	0.55415
837	0.516356	0.543043	0.554467
838	0.516483	0.543244	0.554756
839	0.51664	0.543429	0.555098
840	0.516808	0.543578	0.555441
841	0.516962	0.543711	0.555773
842	0.51708	0.543833	0.55608
843	0.517173	0.543992	0.556349
844	0.517284	0.544161	0.556601
845	0.517413	0.544334	0.556838
846	0.517441	0.544463	0.557086
847	0.517541	0.544612	0.557395
848	0.517674	0.544766	0.557725
849	0.517739	0.544873	0.55797
850	0.517806	0.545026	0.558254
851	0.517896	0.545178	0.558545
852	0.518037	0.54529	0.558816
853	0.518096	0.545454	0.559036
854	0.518193	0.545584	0.559268
855	0.518354	0.54566	0.559526
856	0.51837	0.545736	0.559745
857	0.518442	0.545848	0.559984
858	0.518562	0.545986	0.560235
859	0.518704	0.546094	0.560463
860	0.518812	0.546221	0.560696
861	0.5189	0.546361	0.560939
862	0.518972	0.546513	0.561204
863	0.519108	0.546611	0.561511
864	0.519214	0.546678	0.561781
865	0.519258	0.546718	0.561984
866	0.519405	0.546894	0.562198
867	0.519599	0.5471	0.562514
868	0.519816	0.547315	0.562902
869	0.519916	0.547424	0.563145
870	0.52004	0.547526	0.563409
871	0.52019	0.547658	0.563711
872	0.520386	0.547893	0.564099
873	0.520551	0.548085	0.564429
874	0.52071	0.548276	0.564739
875	0.520871	0.548485	0.565036
876	0.521006	0.548618	0.565293
877	0.521194	0.548822	0.565609
878	0.521429	0.549089	0.565977
879	0.521572	0.549215	0.56625
880	0.521743	0.549407	0.566586
881	0.521923	0.549643	0.56695
882	0.522073	0.549902	0.567273
883	0.522307	0.550123	0.567626
884	0.522573	0.550367	0.56801
885	0.522849	0.550676	0.568438
886	0.522983	0.550822	0.56874
887	0.523188	0.551053	0.569081
888	0.52349	0.551395	0.569478
889	0.523751	0.551623	0.56981
890	0.523931	0.551777	0.570078
891	0.524086	0.551896	0.570328
892	0.524368	0.552078	0.570694
893	0.524657	0.552376	0.571064
894	0.52492	0.552667	0.571393
895	0.525119	0.552844	0.571622
896	0.525274	0.553001	0.571947
897	0.525423	0.553173	0.572239
898	0.525571	0.553366	0.57247
899	0.525709	0.553554	0.572768
900	0.525861	0.553749	0.573042
901	0.52603	0.553943	0.573311
902	0.526224	0.554096	0.573654
903	0.52642	0.55427	0.573917
904	0.526613	0.554461	0.574183
905	0.526793	0.554672	0.574543
906	0.526958	0.554846	0.574832
907	0.527116	0.554999	0.575097
908	0.527267	0.555129	0.575344
909	0.527527	0.555335	0.575717
910	0.527758	0.555565	0.576077
911	0.527955	0.555811	0.576415
912	0.52811	0.556033	0.576693
913	0.528431	0.556331	0.57705
914	0.528783	0.556625	0.577421
915	0.528967	0.55678	0.57771
916	0.52912	0.556956	0.578007
917	0.529308	0.557171	0.578327
918	0.529571	0.557447	0.578685
919	0.529745	0.557578	0.578966
920	0.529981	0.557777	0.579281
921	0.530278	0.558047	0.579635
922	0.530527	0.558252	0.579986
923	0.530789	0.558538	0.5804
924	0.531048	0.558857	0.580836
925	0.531274	0.559114	0.581217
926	0.531527	0.559357	0.581598
927	0.531796	0.559595	0.581969
928	0.532076	0.559827	0.582315
929	0.532351	0.560061	0.582629
930	0.532607	0.560324	0.583009
931	0.532839	0.560618	0.583463
932	0.533028	0.560888	0.583736
933	0.533291	0.561125	0.584044
934	0.533592	0.561352	0.584395
935	0.533841	0.561623	0.584837
936	0.534017	0.561844	0.585161
937	0.534216	0.562066	0.585487
938	0.534523	0.562332	0.58591
939	0.534747	0.562568	0.586251
940	0.534924	0.562775	0.586518
941	0.535056	0.56295	0.586704
942	0.53532	0.563165	0.58705
943	0.535502	0.563346	0.587344
944	0.535634	0.563501	0.587609
945	0.535842	0.563671	0.587932
946	0.536023	0.563883	0.588201
947	0.536189	0.564092	0.588434
948	0.536343	0.564244	0.58863
949	0.536467	0.564418	0.588876
950	0.536618	0.564581	0.589142
951	0.536816	0.564722	0.589418
952	0.536868	0.564759	0.589544
953	0.536941	0.564862	0.589699
954	0.537044	0.56503	0.589891
955	0.537207	0.565233	0.590145
956	0.537346	0.565318	0.590334
957	0.537456	0.565362	0.590481
958	0.53751	0.565464	0.590593
959	0.537746	0.565694	0.59084
960	0.537944	0.565857	0.59102
961	0.537994	0.565846	0.591023
962	0.538249	0.565974	0.591303
963	0.538525	0.566176	0.591635
964	0.538803	0.566438	0.591987
965	0.538999	0.566642	0.592134
966	0.539198	0.566893	0.592412
967	0.539443	0.567186	0.592786
968	0.539844	0.567528	0.593227
969	0.540228	0.567817	0.593684
970	0.540593	0.568122	0.594152
971	0.540926	0.568491	0.594633
972	0.541241	0.568869	0.595143
973	0.541557	0.569231	0.595628
974	0.541875	0.569574	0.596086
975	0.542163	0.56989	0.596695
976	0.542518	0.570212	0.597272
977	0.542894	0.570528	0.597801
978	0.543153	0.570792	0.598177
979	0.543349	0.571022	0.598567
980	0.543609	0.571312	0.599014
981	0.544064	0.571763	0.599573
982	0.542923	0.570798	0.598088
983	0.543141	0.570878	0.598355
984	0.54341	0.571046	0.598653
985	0.543664	0.571254	0.598905
986	0.54393	0.571443	0.59913
987	0.544231	0.571593	0.59937
988	0.544542	0.57175	0.599577
989	0.544836	0.571921	0.599785
990	0.54509	0.57205	0.599949
991	0.545329	0.57209	0.600036
992	0.545643	0.572163	0.600202
993	0.545965	0.572346	0.600478
994	0.546206	0.57253	0.600704
995	0.546401	0.572663	0.600804
996	0.546592	0.572772	0.600875
997	0.546768	0.572867	0.601005
998	0.546932	0.572936	0.601164
999	0.54711	0.572971	0.601282
1000	0.547301	0.57301	0.601361
1001	0.547452	0.573096	0.601463
1002	0.547587	0.573209	0.601634
1003	0.547816	0.573352	0.601865
1004	0.548082	0.573469	0.602111
1005	0.548258	0.573572	0.602313
1006	0.548315	0.573666	0.602468
1007	0.548368	0.573718	0.602628
1008	0.548442	0.573763	0.602788
1009	0.548482	0.573839	0.602916
1010	0.548521	0.57398	0.603045
1011	0.548608	0.574152	0.603236
1012	0.548672	0.57426	0.603466
1013	0.548636	0.574298	0.603684
1014	0.548606	0.574392	0.603939
1015	0.548705	0.574575	0.604276
1016	0.548796	0.57472	0.604558
1017	0.548815	0.574856	0.604776
1018	0.548864	0.575024	0.604989
1019	0.54889	0.575146	0.605256
1020	0.548935	0.575292	0.605624
1021	0.549052	0.575487	0.605986
1022	0.549152	0.575665	0.606304
1023	0.549182	0.575785	0.606583
1024	0.549176	0.575888	0.606822
1025	0.549181	0.576028	0.607064
1026	0.549201	0.576202	0.607363
1027	0.54924	0.576363	0.607703
1028	0.54928	0.576479	0.60803
1029	0.549328	0.576605	0.608322
1030	0.549392	0.576745	0.608563
1031	0.549483	0.576893	0.608792
1032	0.549622	0.577089	0.609116
1033	0.549719	0.577213	0.609429
1034	0.549814	0.57733	0.609669
1035	0.549948	0.577484	0.609911
1036	0.550068	0.577622	0.610162
1037	0.550185	0.577743	0.610408
1038	0.550319	0.577866	0.610641
1039	0.550461	0.577985	0.61082
1040	0.550607	0.578093	0.610965
1041	0.550787	0.578165	0.611096
1042	0.55096	0.578219	0.611232
1043	0.551131	0.578306	0.611387
1044	0.551308	0.578384	0.61152
1045	0.551465	0.578418	0.611601
1046	0.551637	0.578459	0.611716
1047	0.551834	0.578559	0.611852
1048	0.55202	0.578692	0.611948
1049	0.552168	0.578779	0.612014
1050	0.552326	0.578826	0.61206
1051	0.552504	0.578876	0.612107
1052	0.552666	0.57893	0.612138
1053	0.552807	0.578977	0.612163
1054	0.552942	0.578986	0.61218
1055	0.553077	0.578976	0.612183
1056	0.553175	0.578939	0.612141
1057	0.553254	0.578866	0.612074
1058	0.55334	0.578816	0.612011
1059	0.553431	0.578833	0.611986
1060	0.553552	0.57889	0.611999
1061	0.553676	0.578952	0.61201
1062	0.553729	0.578959	0.611978
1063	0.553701	0.578884	0.611904
1064	0.553698	0.578822	0.611835
1065	0.553725	0.5788	0.611806
1066	0.553728	0.578788	0.611796
1067	0.553674	0.578806	0.611834
1068	0.553621	0.578837	0.61188
1069	0.553582	0.57886	0.611897
1070	0.553531	0.578867	0.611897
1071	0.553432	0.578844	0.611911
1072	0.55334	0.57882	0.611927
1073	0.553308	0.578855	0.612005
1074	0.553298	0.578957	0.612143
1075	0.55326	0.579046	0.612282
1076	0.553165	0.579063	0.612396
1077	0.553052	0.579105	0.612525
1078	0.552946	0.579188	0.612663
1079	0.552832	0.579242	0.612777
1080	0.552737	0.579304	0.612919
1081	0.552655	0.579381	0.613089
1082	0.552553	0.579466	0.613264
1083	0.552434	0.57955	0.613425
1084	0.552306	0.579662	0.613633
1085	0.552184	0.579774	0.613857
1086	0.552088	0.579901	0.614057
1087	0.551988	0.580014	0.614268
1088	0.551873	0.580112	0.614489
1089	0.551778	0.580228	0.614685
1090	0.551683	0.580354	0.614884
1091	0.551582	0.580484	0.615109
1092	0.55149	0.580613	0.615346
1093	0.551399	0.580746	0.615621
1094	0.551319	0.58087	0.61587
1095	0.551278	0.580967	0.616067
1096	0.551238	0.581072	0.616282
1097	0.551154	0.581189	0.616506
1098	0.55106	0.581296	0.61671
1099	0.551015	0.581375	0.616901
1100	0.550996	0.581457	0.617103
1101	0.550989	0.581582	0.617307
1102	0.550969	0.581715	0.617504
1103	0.550938	0.581825	0.617668
1104	0.550915	0.581917	0.61781
1105	0.550931	0.581977	0.617904
1106	0.550968	0.582009	0.617968
1107	0.551011	0.582048	0.618049
1108	0.55105	0.582094	0.618139
1109	0.551086	0.582138	0.618221
1110	0.551155	0.582202	0.618282
1111	0.551234	0.582268	0.618327
1112	0.551343	0.582312	0.618308
1113	0.551453	0.582348	0.61829
1114	0.551553	0.582353	0.618303
1115	0.551648	0.582356	0.61832
1116	0.551738	0.582359	0.618304
1117	0.551836	0.582359	0.618272
1118	0.551957	0.582362	0.618223
1119	0.552071	0.582367	0.618173
1120	0.552168	0.58234	0.618084
1121	0.552265	0.582299	0.617971
1122	0.552359	0.582258	0.617863
1123	0.552443	0.582193	0.617778
1124	0.552526	0.582142	0.617705
1125	0.552622	0.582159	0.61765
1126	0.552715	0.58218	0.617598
1127	0.552799	0.582182	0.617553
1128	0.552883	0.582176	0.617506
1129	0.552952	0.582109	0.61743
1130	0.553021	0.582042	0.617353
1131	0.553091	0.581983	0.617263
1132	0.553157	0.581923	0.617166
1133	0.553178	0.581874	0.617096
1134	0.553191	0.58183	0.617036
1135	0.553208	0.581775	0.616963
1136	0.553241	0.581732	0.6169
1137	0.553276	0.581721	0.616868
1138	0.553291	0.581712	0.616838
1139	0.5533	0.581704	0.61682
1140	0.553316	0.5817	0.616822
1141	0.553315	0.581679	0.616806
1142	0.553257	0.581639	0.616778
1143	0.553196	0.58161	0.616769
1144	0.553139	0.581605	0.616809
1145	0.553087	0.581599	0.616851
1146	0.553065	0.581564	0.616886
1147	0.553045	0.581531	0.616921
1148	0.553032	0.581587	0.617028
1149	0.553018	0.581653	0.617143
1150	0.552975	0.581691	0.617245
1151	0.552929	0.581723	0.617342
1152	0.552906	0.581779	0.617435
1153	0.55289	0.581839	0.61752
1154	0.552839	0.581894	0.617598
1155	0.552765	0.58195	0.61767
1156	0.552722	0.581989	0.617765
1157	0.552713	0.582013	0.617897
1158	0.552686	0.582057	0.618021
1159	0.552624	0.582133	0.618117
1160	0.552568	0.582197	0.618208
1161	0.552509	0.582218	0.618311
1162	0.552458	0.582246	0.618419
1163	0.552482	0.582335	0.61858
1164	0.552502	0.58242	0.618736
1165	0.552459	0.58247	0.618867
1166	0.552417	0.582518	0.618994
1167	0.552409	0.582591	0.619119
1168	0.552404	0.582669	0.61924
1169	0.552371	0.582728	0.619309
1170	0.552329	0.582779	0.619364
1171	0.552289	0.582826	0.61942
1172	0.552249	0.582861	0.61947
1173	0.552227	0.582896	0.619557
1174	0.552221	0.582945	0.619685
1175	0.552216	0.582998	0.619799
1176	0.55222	0.58305	0.619902
1177	0.552231	0.583102	0.620007
1178	0.552253	0.58315	0.620103
1179	0.552264	0.583192	0.620183
1180	0.552238	0.583219	0.62022
1181	0.552216	0.583249	0.620261
1182	0.55225	0.583298	0.620331
1183	0.552285	0.583346	0.620399
1184	0.55228	0.583385	0.620429
1185	0.55227	0.583423	0.620456
1186	0.552315	0.583474	0.620509
1187	0.552373	0.583528	0.620565
1188	0.552387	0.583537	0.620575
1189	0.552381	0.583527	0.620567
1190	0.55238	0.583523	0.62058
1191	0.55238	0.583521	0.620604
1192	0.552391	0.583528	0.620632
1193	0.552423	0.583551	0.62067
1194	0.552437	0.583569	0.620689
1195	0.552418	0.583576	0.620672
1196	0.552401	0.583579	0.620656
1197	0.552386	0.58357	0.620654
1198	0.552371	0.583564	0.620652
1199	0.552352	0.583563	0.620653
1200	0.552334	0.583563	0.620653
1201	0.552316	0.583589	0.620633
1202	0.552299	0.583615	0.620613
1203	0.552304	0.583626	0.620611
1204	0.552311	0.583635	0.620612
1205	0.552303	0.583602	0.620568
1206	0.552292	0.58356	0.620514
1207	0.552248	0.583528	0.620439
1208	0.552191	0.583501	0.620358
1209	0.552154	0.583487	0.620326
1210	0.552133	0.583483	0.620326
1211	0.552088	0.583451	0.620302
1212	0.55202	0.583389	0.620256
1213	0.55195	0.583339	0.620204
1214	0.551875	0.583307	0.620142
1215	0.551804	0.583272	0.620086
1216	0.551745	0.583224	0.62005
1217	0.551683	0.583178	0.620015
1218	0.551609	0.58313	0.619975
1219	0.551535	0.583081	0.619935
1220	0.551469	0.583034	0.619896
1221	0.551403	0.582987	0.619857
1222	0.551307	0.582945	0.619825
1223	0.551211	0.582903	0.619795
1224	0.551128	0.582866	0.619752
1225	0.551049	0.58283	0.619708
1226	0.550964	0.582784	0.619673
1227	0.550877	0.582734	0.61964
1228	0.550785	0.582709	0.61961
1229	0.550689	0.582698	0.619582
1230	0.550584	0.582666	0.61955
1231	0.550473	0.582615	0.619514
1232	0.550361	0.582561	0.619481
1233	0.550247	0.582503	0.619449
1234	0.550138	0.582444	0.61942
1235	0.550038	0.58238	0.619392
1236	0.54994	0.582327	0.619366
1237	0.549844	0.582311	0.61935
1238	0.549747	0.582292	0.619329
1239	0.549646	0.582258	0.619288
1240	0.549548	0.582227	0.61925
1241	0.549489	0.582245	0.619275
1242	0.54943	0.582263	0.6193
1243	0.549389	0.582295	0.619346
1244	0.54935	0.582329	0.619392
1245	0.549294	0.582376	0.619429
1246	0.549235	0.582425	0.619465
1247	0.549199	0.582458	0.619516
1248	0.549169	0.582486	0.619572
1249	0.549141	0.582546	0.619635
1250	0.549113	0.582621	0.619702
1251	0.549083	0.582675	0.619777
1252	0.549052	0.582712	0.619859
1253	0.549025	0.582758	0.619937
1254	0.549003	0.582815	0.620011
1255	0.548975	0.582866	0.620081
1256	0.548937	0.582909	0.620147
1257	0.5489	0.582955	0.620219
1258	0.548867	0.583005	0.620311
1259	0.548832	0.583054	0.6204
1260	0.548797	0.583095	0.620473
1261	0.548759	0.58314	0.620546
1262	0.548691	0.583211	0.620626
1263	0.548623	0.583282	0.620705
1264	0.5486	0.583332	0.620803
1265	0.548576	0.583382	0.6209
1266	0.548553	0.583417	0.620977
1267	0.548529	0.583451	0.621051
1268	0.548529	0.583497	0.621126
1269	0.548535	0.583545	0.621202
1270	0.548544	0.583586	0.621262
1271	0.548556	0.583623	0.621318
1272	0.548562	0.583651	0.621368
1273	0.548564	0.583676	0.621415
1274	0.548578	0.583709	0.621469
1275	0.548603	0.583751	0.621527
1276	0.548617	0.583764	0.621565
1277	0.548618	0.583742	0.621578
1278	0.548628	0.583738	0.621593
1279	0.548654	0.583767	0.621615
1280	0.548678	0.583789	0.621628
1281	0.548695	0.583794	0.621614
1282	0.548715	0.583795	0.621601
1283	0.548743	0.583782	0.621586
1284	0.548771	0.583767	0.62157
1285	0.548796	0.583749	0.621542
1286	0.548821	0.583731	0.621513
1287	0.54881	0.583706	0.62146
1288	0.548799	0.583681	0.621406
1289	0.54877	0.583647	0.621315
1290	0.54874	0.583611	0.621219
1291	0.548693	0.583573	0.621134
1292	0.548644	0.583533	0.62105
1293	0.548568	0.583465	0.620942
1294	0.548482	0.583387	0.620825
1295	0.548393	0.583329	0.620722
1296	0.548303	0.583282	0.620629
1297	0.548211	0.583216	0.620525
1298	0.548116	0.583135	0.620414
1299	0.548015	0.583075	0.620306
1300	0.547907	0.583036	0.620203
1301	0.547808	0.582988	0.620111
1302	0.547723	0.58293	0.620034
1303	0.54763	0.582869	0.619949
1304	0.547521	0.582801	0.61985
1305	0.547408	0.582728	0.619743
1306	0.547281	0.582641	0.619619
1307	0.547157	0.582562	0.619502
1308	0.547055	0.582524	0.619427
1309	0.54695	0.582483	0.619349
1310	0.546822	0.582428	0.619239
1311	0.546695	0.582373	0.61913
1312	0.546578	0.582353	0.619022
1313	0.546462	0.582334	0.618914
1314	0.546387	0.582316	0.618836
1315	0.546316	0.582298	0.61876
1316	0.546229	0.582292	0.618692
1317	0.546139	0.582288	0.618626
1318	0.546042	0.582245	0.618562
1319	0.545943	0.58219	0.618499
1320	0.545838	0.58212	0.618442
1321	0.545733	0.582044	0.61839
1322	0.545648	0.582013	0.618366
1323	0.545575	0.58201	0.618357
1324	0.545489	0.581999	0.618326
1325	0.545392	0.581982	0.618276
1326	0.545293	0.581964	0.618236
1327	0.545192	0.581944	0.618207
1328	0.545094	0.581936	0.618199
1329	0.545002	0.581947	0.618227
1330	0.544912	0.581961	0.618245
1331	0.544824	0.581986	0.618243
1332	0.544737	0.58201	0.618248
1333	0.544654	0.582033	0.618281
1334	0.544575	0.582056	0.618313
1335	0.544508	0.582075	0.618329
1336	0.544443	0.582096	0.618347
1337	0.54439	0.582155	0.618388
1338	0.544337	0.582213	0.618428
1339	0.544274	0.582264	0.618462
1340	0.544212	0.582315	0.618494
1341	0.544137	0.582339	0.618515
1342	0.544062	0.58236	0.618534
1343	0.544012	0.582403	0.618574
1344	0.543967	0.582448	0.618618
1345	0.543937	0.58248	0.618631
1346	0.543911	0.582508	0.618636
1347	0.543862	0.582532	0.61863
1348	0.543805	0.582554	0.618623
1349	0.543749	0.582559	0.6186
1350	0.543696	0.582555	0.618568
1351	0.543658	0.582532	0.618531
1352	0.54363	0.582493	0.618491
1353	0.54361	0.582466	0.618438
1354	0.543597	0.582452	0.618374
1355	0.543584	0.582418	0.618297
1356	0.54357	0.58236	0.618206
1357	0.543553	0.582291	0.618103
1358	0.543528	0.582204	0.617979
1359	0.543504	0.582117	0.617859
1360	0.543475	0.582027	0.617743
1361	0.54343	0.581929	0.61761
1362	0.543324	0.581799	0.617414
1363	0.543218	0.581666	0.617215
1364	0.543107	0.581507	0.616988
1365	0.542988	0.581342	0.616755
1366	0.542793	0.581104	0.616449
1367	0.5426	0.580868	0.616147
1368	0.542352	0.580579	0.615793
1369	0.542108	0.580294	0.615444
1370	0.541755	0.579927	0.614979
1371	0.541403	0.579561	0.614515
1372	0.54098	0.579111	0.614007
1373	0.540552	0.578656	0.613499
1374	0.539938	0.578054	0.61282
1375	0.539292	0.577427	0.612113
1376	0.538515	0.576701	0.611337
1377	0.537701	0.575949	0.610543
1378	0.536635	0.57498	0.609548
1379	0.535469	0.573925	0.608474
1380	0.534099	0.572704	0.607269
1381	0.53262	0.571393	0.605994
1382	0.530839	0.569829	0.604447
1383	0.528848	0.56809	0.602711
1384	0.526685	0.566202	0.600799
1385	0.524369	0.564183	0.598732
1386	0.52186	0.56197	0.596428
1387	0.519128	0.559536	0.593853
1388	0.516324	0.557021	0.591141
1389	0.513404	0.554378	0.588217
1390	0.510408	0.551642	0.585135
1391	0.507248	0.548709	0.581729
1392	0.504135	0.545799	0.578299
1393	0.501106	0.542907	0.574768
1394	0.498084	0.539999	0.571183
1395	0.495044	0.536995	0.567361
1396	0.492078	0.534049	0.563582
1397	0.489412	0.531324	0.559938
1398	0.486791	0.528634	0.556315
1399	0.484451	0.526133	0.552755
1400	0.482153	0.523671	0.549234
1401	0.480473	0.521745	0.546189
1402	0.4788	0.519825	0.543154
1403	0.477668	0.518359	0.540439
1404	0.476543	0.516901	0.537734
1405	0.476088	0.51603	0.535659
1406	0.475678	0.5152	0.533628
1407	0.475815	0.514901	0.532106
1408	0.476023	0.514672	0.530653
1409	0.4767	0.51494	0.529862
1410	0.477474	0.515311	0.529208
1411	0.478665	0.516146	0.529238
1412	0.479978	0.517116	0.529467
1413	0.481539	0.51844	0.530337
1414	0.483197	0.519901	0.531454
1415	0.485108	0.521727	0.533266
1416	0.487146	0.523734	0.535425
1417	0.489252	0.525903	0.538058
1418	0.491404	0.528173	0.540989
1419	0.493621	0.5306	0.544311
1420	0.495893	0.533149	0.547938
1421	0.498077	0.535656	0.551641
1422	0.50018	0.538124	0.555417
1423	0.502248	0.540577	0.559255
1424	0.504274	0.54301	0.563166
1425	0.506168	0.54531	0.566918
1426	0.507869	0.547417	0.570436
1427	0.509515	0.549452	0.57386
1428	0.511059	0.551358	0.577108
1429	0.512522	0.553158	0.580181
1430	0.513801	0.554719	0.582851
1431	0.515045	0.556231	0.585431
1432	0.516183	0.557595	0.587739
1433	0.517283	0.558907	0.589946
1434	0.518227	0.560007	0.591751
1435	0.519155	0.561082	0.593506
1436	0.519982	0.56201	0.594977
1437	0.520796	0.56292	0.596412
1438	0.521484	0.563673	0.597537
1439	0.522172	0.564422	0.598653
1440	0.522809	0.565081	0.599591
1441	0.523445	0.56574	0.600527
1442	0.523946	0.566245	0.601221
1443	0.524449	0.566753	0.601918
1444	0.524887	0.56719	0.602495
1445	0.525326	0.567627	0.603071
1446	0.525708	0.567992	0.603526
1447	0.526088	0.568354	0.603974
1448	0.526437	0.568668	0.604358
1449	0.526782	0.568976	0.604735
1450	0.52707	0.569266	0.605052
1451	0.527349	0.569554	0.605359
1452	0.527588	0.569789	0.605623
1453	0.527816	0.570012	0.605878
1454	0.528056	0.570234	0.606125
1455	0.528299	0.570456	0.606372
1456	0.528517	0.570672	0.606588
1457	0.528725	0.570887	0.606791
1458	0.528945	0.571086	0.606991
1459	0.52917	0.571277	0.60719
1460	0.52938	0.571454	0.607361
1461	0.529582	0.571626	0.607517
1462	0.529803	0.571813	0.607697
1463	0.530039	0.57201	0.607895
1464	0.53029	0.572204	0.608094
1465	0.530552	0.572394	0.608294
1466	0.530823	0.572596	0.608492
1467	0.531102	0.572805	0.608688
1468	0.531376	0.573018	0.608897
1469	0.531648	0.573238	0.609121
1470	0.531929	0.57346	0.609345
1471	0.532221	0.573686	0.609572
1472	0.53253	0.573931	0.609814
1473	0.532868	0.574203	0.610078
1474	0.533194	0.574463	0.610325
1475	0.533498	0.574703	0.610542
1476	0.533819	0.574958	0.610777
1477	0.534171	0.575244	0.61105
1478	0.534519	0.575521	0.611312
1479	0.534854	0.57577	0.611548
1480	0.535196	0.576027	0.611792
1481	0.535556	0.576308	0.612055
1482	0.535918	0.576589	0.612314
1483	0.536283	0.576864	0.612552
1484	0.53665	0.577139	0.612795
1485	0.537016	0.57742	0.613065
1486	0.537381	0.577705	0.613338
1487	0.53775	0.578012	0.61362
1488	0.538117	0.578316	0.6139
1489	0.538473	0.578586	0.614144
1490	0.53883	0.57886	0.614391
1491	0.539178	0.579164	0.614664
1492	0.539527	0.579468	0.614937
1493	0.53986	0.579762	0.615196
1494	0.540193	0.580056	0.615456
1495	0.540499	0.580346	0.615726
1496	0.540806	0.580635	0.615996
1497	0.541115	0.580902	0.616234
1498	0.541424	0.581168	0.616472
1499	0.541729	0.581472	0.61673
1500	0.542036	0.58178	0.61699
1501	0.542326	0.582033	0.617261
1502	0.542614	0.582284	0.617531
1503	0.542863	0.582524	0.61777
1504	0.543107	0.582761	0.618005
1505	0.543381	0.582992	0.618264
1506	0.543659	0.583222	0.618528
1507	0.543914	0.58347	0.618763
1508	0.544167	0.583722	0.618992
1509	0.544395	0.583963	0.619239
1510	0.544618	0.584204	0.619491
1511	0.544829	0.584423	0.619724
1512	0.545036	0.584635	0.61995
1513	0.545224	0.584851	0.620179
1514	0.545406	0.585068	0.62041
1515	0.545578	0.585265	0.620638
1516	0.545747	0.585457	0.620864
1517	0.545895	0.585636	0.621088
1518	0.546036	0.58581	0.621314
1519	0.54617	0.586001	0.621553
1520	0.5463	0.586197	0.621797
1521	0.54642	0.586364	0.622022
1522	0.546534	0.586516	0.622237
1523	0.546629	0.586663	0.622448
1524	0.546709	0.586807	0.622656
1525	0.546783	0.586955	0.622859
1526	0.546854	0.587105	0.623061
1527	0.546924	0.587249	0.623273
1528	0.546992	0.587387	0.623495
1529	0.54706	0.587528	0.623707
1530	0.547128	0.587672	0.62391
1531	0.547185	0.587798	0.624099
1532	0.547236	0.587905	0.624279
1533	0.54729	0.588019	0.624463
1534	0.54734	0.588139	0.624646
1535	0.547381	0.588247	0.624809
1536	0.54742	0.588348	0.624956
1537	0.547466	0.588455	0.625123
1538	0.547515	0.588566	0.62531
1539	0.54755	0.588653	0.625477
1540	0.547567	0.588711	0.625617
1541	0.547575	0.588761	0.625757
1542	0.547574	0.588805	0.625899
1543	0.547571	0.588853	0.626035
1544	0.547561	0.588903	0.626163
1545	0.547548	0.588943	0.626288
1546	0.54753	0.588963	0.626402
1547	0.547517	0.588993	0.626527
1548	0.547521	0.589041	0.626671
1549	0.547525	0.589081	0.626802
1550	0.547522	0.589114	0.626912
1551	0.547513	0.589143	0.627026
1552	0.547494	0.58916	0.627149
1553	0.547474	0.589169	0.62726
1554	0.547457	0.589168	0.627352
1555	0.547462	0.589188	0.627449
1556	0.547518	0.589244	0.627553
1557	0.547556	0.589292	0.627652
1558	0.547557	0.589335	0.627741
1559	0.547559	0.58938	0.627828
1560	0.547551	0.589414	0.627908
1561	0.547542	0.589449	0.627986
1562	0.547538	0.589494	0.628058
1563	0.547543	0.589544	0.628148
1564	0.547571	0.589609	0.628274
1565	0.547589	0.589667	0.628392
1566	0.54758	0.5897	0.628493
1567	0.547587	0.589737	0.628595
1568	0.547636	0.58978	0.62869
1569	0.547673	0.589819	0.62878
1570	0.547672	0.589852	0.628859
1571	0.547681	0.589892	0.628939
1572	0.54772	0.589946	0.629011
1573	0.547755	0.589993	0.629078
1574	0.547782	0.590023	0.629136
1575	0.547811	0.590055	0.629196
1576	0.547849	0.590087	0.629251
1577	0.547887	0.590118	0.629302
1578	0.547928	0.59015	0.629346
1579	0.54797	0.590193	0.629394
1580	0.548003	0.590274	0.629443
1581	0.548038	0.590348	0.629489
1582	0.54811	0.590388	0.62953
1583	0.548182	0.590418	0.629572
1584	0.548242	0.590409	0.629608
1585	0.548309	0.590409	0.629645
1586	0.548395	0.590439	0.629687
1587	0.548475	0.590465	0.629725
1588	0.548535	0.59047	0.629717
1589	0.548598	0.590479	0.62971
1590	0.548691	0.590527	0.629725
1591	0.548787	0.590577	0.629744
1592	0.548887	0.590634	0.629793
1593	0.548994	0.590688	0.629837
1594	0.549118	0.590711	0.629842
1595	0.549241	0.590734	0.629849
1596	0.549362	0.590781	0.629868
1597	0.549486	0.590834	0.6299
1598	0.549599	0.590886	0.629981
1599	0.549715	0.590935	0.630045
1600	0.549859	0.590981	0.630038
1601	0.549999	0.591026	0.630034
1602	0.550122	0.591078	0.630046
1603	0.550248	0.591137	0.63006
1604	0.550362	0.591184	0.63005
1605	0.55047	0.591223	0.630034
1606	0.550566	0.591229	0.629998
1607	0.550669	0.591241	0.629966
1608	0.5508	0.591298	0.629957
1609	0.550923	0.59135	0.629941
1610	0.550994	0.591357	0.629878
1611	0.551075	0.591367	0.629822
1612	0.551206	0.591405	0.629814
1613	0.551339	0.591449	0.62981
1614	0.551486	0.591535	0.629816
1615	0.551632	0.591621	0.629818
1616	0.551749	0.591692	0.629809
1617	0.551868	0.591765	0.629803
1618	0.551994	0.591854	0.62983
1619	0.552118	0.591939	0.629852
1620	0.552262	0.591987	0.629843
1621	0.552404	0.592039	0.629837
1622	0.552494	0.592091	0.629835
1623	0.55259	0.592147	0.629842
1624	0.552734	0.592242	0.629894
1625	0.552879	0.592332	0.629942
1626	0.553011	0.592391	0.629961
1627	0.553142	0.592456	0.629983
1628	0.553245	0.592544	0.63001
1629	0.553351	0.592629	0.630037
1630	0.553478	0.592689	0.630074
1631	0.553606	0.592749	0.630111
1632	0.553724	0.592826	0.630141
1633	0.55384	0.592906	0.630172
1634	0.553956	0.592992	0.63021
1635	0.554069	0.593075	0.630242
1636	0.554163	0.593139	0.63026
1637	0.55426	0.593206	0.630286
1638	0.554386	0.593288	0.630339
1639	0.554513	0.593372	0.630385
1640	0.554627	0.593455	0.630411
1641	0.554744	0.593544	0.630448
1642	0.554868	0.593656	0.630508
1643	0.554993	0.59377	0.630573
1644	0.555118	0.593874	0.630669
1645	0.555236	0.59397	0.630756
1646	0.555336	0.59405	0.630806
1647	0.555433	0.594129	0.630856
1648	0.555528	0.594209	0.630906
1649	0.555625	0.594295	0.630962
1650	0.55571	0.594389	0.631036
1651	0.555802	0.594491	0.631119
1652	0.555917	0.594608	0.631219
1653	0.55603	0.594722	0.631317
1654	0.556142	0.594837	0.63141
1655	0.556254	0.59495	0.631502
1656	0.556365	0.595039	0.631598
1657	0.556478	0.595135	0.631709
1658	0.556586	0.595253	0.63185
1659	0.556686	0.595365	0.631975
1660	0.556756	0.595466	0.632058
1661	0.556828	0.595559	0.632144
1662	0.556917	0.595639	0.632248
1663	0.557006	0.595732	0.632346
1664	0.557086	0.595843	0.632427
1665	0.55717	0.595944	0.63252
1666	0.557256	0.596025	0.632633
1667	0.557338	0.596117	0.632743
1668	0.557419	0.596227	0.632847
1669	0.557501	0.596331	0.632962
1670	0.557585	0.596422	0.633103
1671	0.557666	0.596518	0.633233
1672	0.557745	0.596627	0.633342
1673	0.557837	0.596743	0.633474
1674	0.557946	0.596865	0.633646
1675	0.558035	0.596979	0.633787
1676	0.558093	0.597085	0.633878
1677	0.558156	0.597191	0.63397
1678	0.558228	0.597302	0.634073
1679	0.558304	0.597406	0.634194
1680	0.558379	0.597495	0.634329
1681	0.558453	0.597581	0.634438
1682	0.558522	0.597657	0.634512
1683	0.558589	0.597751	0.634609
1684	0.558652	0.597868	0.634729
1685	0.558731	0.597984	0.634857
1686	0.55883	0.5981	0.634995
1687	0.558913	0.598211	0.63513
1688	0.558978	0.598317	0.635261
1689	0.559048	0.598414	0.635401
1690	0.559124	0.598506	0.635547
1691	0.559184	0.598595	0.635663
1692	0.559231	0.598679	0.635758
1693	0.559282	0.598757	0.635857
1694	0.559337	0.59883	0.635959
1695	0.559412	0.598904	0.636092
1696	0.5595	0.59898	0.636242
1697	0.559536	0.598989	0.636302
1698	0.559549	0.598963	0.63632
1699	0.559574	0.599003	0.636436
1700	0.559603	0.59907	0.636597
1701	0.559646	0.599138	0.636696
1702	0.559691	0.599209	0.636765
1703	0.559734	0.599288	0.63686
1704	0.559781	0.599372	0.636973
1705	0.55983	0.599455	0.637099
1706	0.559879	0.599541	0.637231
1707	0.559937	0.599614	0.637355
1708	0.559993	0.59968	0.637477
1709	0.560039	0.599741	0.637577
1710	0.560086	0.599802	0.637672
1711	0.560101	0.599825	0.637739
1712	0.560109	0.599841	0.6378
1713	0.560133	0.599886	0.637867
1714	0.560159	0.599935	0.637942
1715	0.560176	0.59996	0.637981
1716	0.56019	0.599984	0.638013
1717	0.560176	0.599938	0.63802
1718	0.560161	0.599885	0.638026
1719	0.560128	0.599884	0.638023
1720	0.560093	0.599885	0.638019
1721	0.560122	0.599894	0.63806
1722	0.560153	0.599903	0.638101
1723	0.560178	0.599923	0.638095
1724	0.560201	0.599943	0.638089
1725	0.560189	0.599959	0.638104
1726	0.56018	0.599972	0.63812
1727	0.560199	0.599936	0.638116
1728	0.560215	0.599902	0.638109
1729	0.560212	0.599896	0.638095
1730	0.560206	0.599885	0.638082
1731	0.560179	0.599848	0.638055
1732	0.560153	0.599811	0.638018
1733	0.560132	0.599774	0.637924
1734	0.560096	0.599726	0.63783
1735	0.560018	0.599647	0.637751
1736	0.559944	0.599557	0.637659
1737	0.559881	0.599432	0.637526
1738	0.559829	0.599324	0.637417
1739	0.559814	0.599266	0.63738
1740	0.559788	0.5992	0.637311
1741	0.559737	0.599113	0.63717
1742	0.559708	0.59904	0.637032
1743	0.559721	0.598994	0.636904
1744	0.559703	0.598916	0.636789
1745	0.559635	0.598789	0.636696
1746	0.559582	0.59865	0.636582
1747	0.55955	0.598496	0.636439
1748	0.559525	0.598381	0.636307
1749	0.559509	0.598316	0.636189
1750	0.559521	0.598229	0.6361
1751	0.559564	0.598122	0.636041
1752	0.559586	0.598031	0.635963
1753	0.559589	0.597953	0.635868
1754	0.559581	0.597895	0.635774
1755	0.559564	0.597851	0.635679
1756	0.559552	0.597759	0.63557
1757	0.559543	0.597636	0.635451
1758	0.559516	0.59753	0.635306
1759	0.559481	0.597432	0.635146
1760	0.559468	0.597331	0.63503
1761	0.559466	0.597228	0.634932
1762	0.559473	0.597114	0.634797
1763	0.559483	0.596995	0.634648
1764	0.559523	0.596973	0.634542
1765	0.559574	0.596977	0.634447
1766	0.559584	0.596922	0.634367
1767	0.559586	0.596854	0.63429
1768	0.559566	0.596767	0.634134
1769	0.559541	0.596675	0.633964
1770	0.559569	0.59661	0.63382
1771	0.559605	0.596547	0.633679
1772	0.559642	0.596448	0.633562
1773	0.559678	0.596345	0.633444
1774	0.559672	0.596278	0.633287
1775	0.559667	0.596204	0.633126
1776	0.559722	0.596097	0.632975
1777	0.559778	0.595998	0.632824
1778	0.559816	0.595931	0.632687
1779	0.55985	0.595855	0.632553
1780	0.559887	0.595749	0.632458
1781	0.559926	0.595669	0.632365
1782	0.559918	0.595843	0.632638
1783	0.559897	0.595831	0.632623
1784	0.559845	0.595828	0.632571
1785	0.559798	0.595837	0.632524
1786	0.5598	0.595862	0.632531
1787	0.55982	0.595886	0.632554
1788	0.559839	0.595896	0.632523
1789	0.559834	0.595877	0.632437
1790	0.559812	0.595858	0.632367
1791	0.559778	0.595856	0.6323
1792	0.559751	0.595849	0.632237
1793	0.559717	0.5958	0.632181
1794	0.559681	0.595749	0.632129
1795	0.559722	0.595761	0.632131
1796	0.559789	0.595783	0.632149
1797	0.559835	0.595821	0.632162
1798	0.559861	0.595892	0.632177
1799	0.559851	0.595956	0.632188
1800	0.559797	0.595968	0.632176
1801	0.559766	0.595993	0.632175
1802	0.559795	0.596062	0.63223
1803	0.559828	0.596138	0.632302
1804	0.559884	0.596284	0.632467
1805	0.559947	0.596444	0.632645
1806	0.559985	0.59657	0.63275
1807	0.560022	0.596683	0.63283
1808	0.56003	0.596761	0.632882
1809	0.559984	0.596808	0.632937
1810	0.559956	0.596855	0.633007
1811	0.560001	0.596916	0.633107
1812	0.560035	0.596982	0.633199
1813	0.56004	0.597074	0.633216
1814	0.560041	0.597162	0.633226
1815	0.560003	0.597207	0.633258
1816	0.559953	0.597247	0.633298
1817	0.559919	0.597296	0.633343
1818	0.559901	0.597345	0.633401
1819	0.559888	0.597371	0.633442
1820	0.559871	0.597375	0.633445
1821	0.559846	0.597387	0.633455
1822	0.559799	0.597397	0.633466
1823	0.559754	0.597397	0.633469
1824	0.559714	0.59739	0.633479
1825	0.559668	0.597383	0.633489
1826	0.559573	0.597338	0.633475
1827	0.559473	0.597285	0.633454
1828	0.559392	0.597259	0.63343
1829	0.55931	0.597239	0.633398
1830	0.559231	0.59722	0.633396
1831	0.559143	0.597185	0.633395
1832	0.559048	0.597142	0.633366
1833	0.558969	0.597127	0.633334
1834	0.558884	0.597106	0.633302
1835	0.558781	0.597047	0.633266
1836	0.558679	0.596986	0.633235
1837	0.558583	0.596947	0.633243
1838	0.558479	0.596906	0.633245
1839	0.558347	0.596861	0.633222
1840	0.558204	0.596808	0.633201
1841	0.558069	0.59674	0.633176
1842	0.557946	0.596682	0.633137
1843	0.557808	0.59664	0.633089
1844	0.557651	0.596619	0.633052
1845	0.557501	0.59659	0.633018
1846	0.557321	0.596494	0.63295
1847	0.557129	0.596388	0.632874
1848	0.55688	0.596256	0.632799
1849	0.556642	0.596137	0.632738
1850	0.556399	0.596012	0.632681
1851	0.55614	0.595872	0.632614
1852	0.555864	0.595714	0.632513
1853	0.555596	0.595551	0.632406
1854	0.555322	0.595375	0.632283
1855	0.554977	0.595148	0.632091
1856	0.554624	0.594908	0.631896
1857	0.554226	0.594616	0.631647
1858	0.553824	0.59432	0.63139
1859	0.553385	0.593969	0.631091
1860	0.552947	0.593612	0.630796
1861	0.552499	0.593239	0.630455
1862	0.552042	0.592851	0.630095
1863	0.551571	0.592441	0.629699
1864	0.551082	0.592002	0.629268
1865	0.550561	0.591537	0.628793
1866	0.550003	0.591026	0.628247
1867	0.549431	0.590503	0.627684
1868	0.548781	0.589943	0.627032
1869	0.548125	0.589379	0.626369
1870	0.547395	0.588713	0.625588
1871	0.546653	0.588027	0.624792
1872	0.545891	0.587332	0.623966
1873	0.545128	0.586648	0.623129
1874	0.544325	0.585916	0.622193
1875	0.543485	0.585146	0.62118
1876	0.54263	0.584387	0.620153
1877	0.541747	0.583626	0.619092
1878	0.540831	0.582819	0.61799
1879	0.539771	0.581836	0.616742
1880	0.538713	0.580853	0.615499
1881	0.537627	0.579846	0.614228
1882	0.536543	0.578842	0.612957
1883	0.535379	0.577731	0.611539
1884	0.534195	0.576603	0.610091
1885	0.532978	0.575434	0.608572
1886	0.531742	0.574231	0.60701
1887	0.530454	0.572955	0.605389
1888	0.529085	0.571562	0.603671
1889	0.527706	0.570162	0.601945
1890	0.526298	0.56875	0.600175
1891	0.524881	0.567324	0.59839
1892	0.523341	0.565785	0.596453
1893	0.52179	0.564238	0.594504
1894	0.520259	0.562731	0.592597
1895	0.51873	0.561219	0.590681
1896	0.517197	0.559668	0.588775
1897	0.51564	0.558074	0.586857
1898	0.514174	0.5566	0.585067
1899	0.51276	0.555203	0.583363
1900	0.511403	0.553854	0.581723
1901	0.510164	0.552596	0.580193
1902	0.508971	0.551392	0.578717
1903	0.507949	0.5504	0.577491
1904	0.506941	0.549421	0.576284
1905	0.506154	0.548652	0.57533
1906	0.505388	0.547904	0.574397
1907	0.504841	0.547401	0.573757
1908	0.504353	0.54697	0.573197
1909	0.504009	0.546666	0.57277
1910	0.503754	0.546443	0.572439
1911	0.503563	0.546283	0.5722
1912	0.503482	0.546229	0.572097
1913	0.503445	0.546217	0.572039
1914	0.503551	0.546351	0.57215
1915	0.503656	0.54649	0.572264
1916	0.503807	0.546699	0.572465
1917	0.503962	0.546911	0.572669
1918	0.504178	0.547183	0.57294
1919	0.504398	0.547467	0.57322
1920	0.504629	0.547755	0.573506
1921	0.504885	0.548054	0.5738
1922	0.505135	0.548365	0.574112
1923	0.505382	0.548686	0.574441
1924	0.505618	0.548984	0.574742
1925	0.505827	0.549245	0.575007
1926	0.506033	0.549498	0.575277
1927	0.506231	0.549746	0.575571
1928	0.506424	0.549995	0.57586
1929	0.506579	0.550221	0.576071
1930	0.506734	0.550445	0.576279
1931	0.5069	0.55065	0.57652
1932	0.507069	0.550856	0.576765
1933	0.507209	0.551031	0.576992
1934	0.507332	0.551189	0.577206
1935	0.507435	0.55133	0.577402
1936	0.507526	0.551461	0.577589
1937	0.50761	0.551588	0.57778
1938	0.507686	0.551701	0.577969
1939	0.507767	0.551815	0.578163
1940	0.507842	0.551932	0.57836
1941	0.50791	0.552045	0.578555
1942	0.50794	0.552168	0.578764
1943	0.507969	0.552292	0.578976
1944	0.508027	0.552402	0.57921
1945	0.508087	0.552506	0.579448
1946	0.50816	0.552602	0.579679
1947	0.508231	0.552691	0.579902
1948	0.508291	0.552779	0.58014
1949	0.508339	0.552862	0.580391
1950	0.508413	0.552984	0.580665
1951	0.508527	0.553159	0.580979
1952	0.508649	0.553337	0.581293
1953	0.508821	0.553528	0.5816
1954	0.508996	0.553721	0.581907
1955	0.50918	0.553937	0.58224
1956	0.509364	0.554152	0.582573
1957	0.509551	0.554362	0.582905
1958	0.509741	0.55457	0.58324
1959	0.509973	0.554827	0.583599
1960	0.51022	0.555101	0.583962
1961	0.510474	0.55538	0.584326
1962	0.510741	0.555669	0.584704
1963	0.510994	0.555945	0.58508
1964	0.511225	0.556202	0.585451
1965	0.511461	0.556462	0.585821
1966	0.511718	0.556733	0.586192
1967	0.511973	0.557004	0.586563
1968	0.51222	0.557278	0.586945
1969	0.512466	0.557552	0.587327
1970	0.512691	0.557816	0.5877
1971	0.512915	0.558082	0.588072
1972	0.513186	0.558361	0.588476
1973	0.513469	0.558643	0.588888
1974	0.513758	0.558948	0.58931
1975	0.514054	0.559271	0.589742
1976	0.514337	0.559582	0.590176
1977	0.514603	0.559875	0.590607
1978	0.514884	0.560179	0.591055
1979	0.515194	0.56051	0.591546
1980	0.515503	0.56084	0.592031
1981	0.515801	0.561154	0.592466
1982	0.516099	0.561468	0.592901
1983	0.516382	0.561766	0.593323
1984	0.516666	0.562066	0.593746
1985	0.51697	0.562423	0.594181
1986	0.517278	0.562785	0.594618
1987	0.51761	0.563155	0.595068
1988	0.517955	0.563533	0.595526
1989	0.51833	0.563922	0.596014
1990	0.518724	0.564316	0.596524
1991	0.519141	0.56473	0.597037
1992	0.519591	0.565174	0.597555
1993	0.520044	0.56562	0.598081
1994	0.520503	0.566073	0.598634
1995	0.52097	0.56653	0.599191
1996	0.521493	0.567037	0.599781
1997	0.522018	0.567545	0.600372
1998	0.522554	0.56806	0.600938
1999	0.523092	0.568575	0.601503
2000	0.523649	0.569112	0.602083
2001	0.524212	0.569655	0.602668
2002	0.52477	0.570198	0.603255
2003	0.525325	0.570739	0.603843
2004	0.525911	0.571301	0.60444
2005	0.526527	0.571886	0.605046
2006	0.52714	0.572466	0.605645
2007	0.527752	0.573038	0.606232
2008	0.528375	0.573617	0.606834
2009	0.529032	0.574221	0.607477
2010	0.52969	0.574823	0.608121
2011	0.530354	0.575393	0.60877
2012	0.531019	0.575964	0.609422
2013	0.531653	0.57653	0.610009
2014	0.532287	0.577097	0.610593
2015	0.532931	0.577701	0.611185
2016	0.53358	0.578315	0.61178
2017	0.534223	0.578918	0.612368
2018	0.534865	0.579516	0.612953
2019	0.535504	0.580115	0.613545
2020	0.536141	0.580716	0.614145
2021	0.536791	0.581326	0.614734
2022	0.537461	0.581951	0.615305
2023	0.53813	0.582576	0.615885
2024	0.538791	0.5832	0.616491
2025	0.539453	0.583827	0.617094
2026	0.5401	0.58445	0.617664
2027	0.540749	0.585076	0.618236
2028	0.541376	0.585646	0.618787
2029	0.542004	0.586215	0.61934
2030	0.542617	0.586784	0.619848
2031	0.543228	0.587353	0.620347
2032	0.54383	0.587905	0.620841
2033	0.544428	0.588451	0.621333
2034	0.545022	0.588995	0.621838
2035	0.545611	0.589538	0.622351
2036	0.546183	0.59006	0.622844
2037	0.546732	0.590553	0.623307
2038	0.54729	0.591058	0.623777
2039	0.547868	0.59159	0.624256
2040	0.548431	0.592112	0.624732
2041	0.548907	0.59257	0.625192
2042	0.549386	0.593031	0.625652
2043	0.549933	0.593518	0.62609
2044	0.550482	0.594007	0.626529
2045	0.55098	0.594484	0.626995
2046	0.551474	0.594962	0.627464
2047	0.551924	0.595422	0.627881
2048	0.552362	0.595877	0.628283
2049	0.552769	0.596274	0.628645
2050	0.55316	0.596639	0.628985
2051	0.553569	0.59703	0.629353
2052	0.553997	0.597445	0.629746
2053	0.554407	0.597842	0.630119
2054	0.554783	0.598206	0.630458
2055	0.555141	0.598563	0.630786
2056	0.555447	0.598896	0.631086
2057	0.555751	0.599221	0.631384
2058	0.556047	0.599479	0.631655
2059	0.556344	0.599739	0.631926
2060	0.556622	0.600018	0.632181
2061	0.556901	0.600299	0.632437
2062	0.557141	0.60054	0.632625
2063	0.557378	0.600778	0.632803
2064	0.557615	0.601027	0.633032
2065	0.557853	0.601281	0.633279
2066	0.558076	0.601526	0.633495
2067	0.558291	0.601764	0.633693
2068	0.558493	0.601996	0.633877
2069	0.558683	0.602224	0.634046
2070	0.558857	0.602422	0.634207
2071	0.55901	0.602576	0.634359
2072	0.559146	0.602719	0.634503
2073	0.559231	0.602825	0.634618
2074	0.559313	0.602928	0.634729
2075	0.559374	0.603016	0.634798
2076	0.559432	0.603101	0.634865
2077	0.559464	0.603167	0.634897
2078	0.559497	0.603234	0.63493
2079	0.559462	0.603267	0.634919
2080	0.559417	0.603293	0.634901
2081	0.559377	0.603308	0.634855
2082	0.559339	0.603324	0.634805
2083	0.55924	0.603254	0.634699
2084	0.559109	0.603141	0.634559
2085	0.55899	0.603053	0.634435
2086	0.55888	0.602985	0.634322
2087	0.55875	0.602913	0.634207
2088	0.558601	0.602837	0.634091
2089	0.558438	0.602751	0.633942
2090	0.558239	0.602654	0.633745
2091	0.558042	0.602546	0.63355
2092	0.557855	0.60239	0.63335
2093	0.557661	0.602229	0.633147
2094	0.557417	0.602032	0.632915
2095	0.557173	0.601835	0.632683
2096	0.556928	0.601676	0.63252
2097	0.556681	0.60152	0.63236
2098	0.556393	0.60131	0.632118
2099	0.5561	0.601094	0.631866
2100	0.555848	0.600899	0.631641
2101	0.555609	0.600713	0.631424
2102	0.555389	0.60056	0.631227
2103	0.55518	0.600423	0.631042
2104	0.554959	0.600279	0.630845
2105	0.554734	0.600134	0.630639
2106	0.554522	0.600006	0.630429
2107	0.554332	0.599897	0.63022
2108	0.554162	0.599806	0.630031
2109	0.554031	0.599746	0.629886
2110	0.553903	0.599689	0.629745
2111	0.553781	0.599651	0.629623
2112	0.553668	0.599615	0.629511
2113	0.553626	0.599604	0.629444
2114	0.553584	0.599597	0.629379
2115	0.553566	0.599643	0.629351
2116	0.553549	0.599689	0.629325
2117	0.553558	0.599762	0.629333
2118	0.553568	0.599839	0.629345
2119	0.553602	0.599955	0.629425
2120	0.553634	0.60007	0.629512
2121	0.55365	0.600135	0.62955
2122	0.553659	0.600182	0.629566
2123	0.553637	0.600215	0.629596
2124	0.553592	0.600242	0.629631
2125	0.553526	0.600258	0.62965
2126	0.553431	0.600253	0.629647
2127	0.553333	0.600243	0.629631
2128	0.553233	0.600224	0.629594
2129	0.553096	0.600164	0.629542
2130	0.552893	0.600018	0.629458
2131	0.552664	0.59985	0.62934
2132	0.552315	0.599587	0.629065
2133	0.551964	0.59931	0.628789
2134	0.551598	0.598971	0.628502
2135	0.551224	0.598629	0.628206
2136	0.550687	0.598187	0.62775
2137	0.550139	0.597737	0.627285
2138	0.549521	0.59718	0.626724
2139	0.548892	0.596609	0.626148
2140	0.548142	0.595888	0.625365
2141	0.547363	0.595138	0.624535
2142	0.546479	0.594332	0.623636
2143	0.545556	0.593506	0.622714
2144	0.54448	0.59254	0.621612
2145	0.543306	0.591492	0.620398
2146	0.542064	0.590378	0.619134
2147	0.540757	0.589182	0.617822
2148	0.539332	0.587861	0.61638
2149	0.537745	0.586376	0.61477
2150	0.536065	0.584811	0.613082
2151	0.53421	0.583111	0.611263
2152	0.532231	0.581293	0.60937
2153	0.529909	0.57915	0.607262
2154	0.527528	0.576956	0.605095
2155	0.52491	0.57455	0.602713
2156	0.522234	0.572092	0.600289
2157	0.519142	0.56929	0.597578
2158	0.516024	0.566461	0.594849
2159	0.512725	0.563401	0.591997
2160	0.509403	0.560317	0.589125
2161	0.505651	0.556823	0.585851
2162	0.501851	0.553281	0.582532
2163	0.498009	0.549745	0.57918
2164	0.494177	0.546223	0.575829
2165	0.490261	0.542552	0.572284
2166	0.486329	0.538837	0.568668
2167	0.48253	0.535233	0.565079
2168	0.478827	0.531711	0.561521
2169	0.475094	0.528136	0.557856
2170	0.471353	0.524531	0.554111
2171	0.467827	0.521057	0.550394
2172	0.464532	0.517731	0.546721
2173	0.461326	0.514449	0.543016
2174	0.458265	0.511245	0.539268
2175	0.455344	0.508149	0.535565
2176	0.452715	0.505286	0.531966
2177	0.450135	0.502441	0.528322
2178	0.447727	0.499672	0.524579
2179	0.445389	0.496958	0.520853
2180	0.443407	0.494541	0.517317
2181	0.44145	0.492136	0.513771
2182	0.439783	0.489921	0.510293
2183	0.438136	0.487715	0.506813
2184	0.436856	0.485789	0.503581
2185	0.435591	0.483871	0.500349
2186	0.434537	0.48214	0.497186
2187	0.433493	0.480418	0.494018
2188	0.432698	0.478976	0.491198
2189	0.431936	0.477574	0.488435
2190	0.431368	0.476364	0.48585
2191	0.430849	0.475192	0.483304
2192	0.430486	0.474198	0.48105
2193	0.430175	0.473277	0.47891
2194	0.430029	0.472517	0.476997
2195	0.429975	0.471841	0.475216
2196	0.429975	0.471297	0.473663
2197	0.430008	0.470859	0.47229
2198	0.430146	0.470529	0.471114
2199	0.430396	0.470307	0.47015
2200	0.430682	0.470189	0.469334
2201	0.431023	0.470223	0.468737
2202	0.431419	0.470343	0.468311
2203	0.431927	0.470636	0.468237
2204	0.432483	0.471018	0.468295
2205	0.433149	0.471618	0.468699
2206	0.433868	0.472281	0.469233
2207	0.434766	0.473184	0.47025
2208	0.435682	0.474122	0.471339
2209	0.436733	0.475264	0.472811
2210	0.437816	0.476451	0.474342
2211	0.439047	0.477931	0.476323
2212	0.440296	0.479432	0.478348
2213	0.441551	0.480994	0.480611
2214	0.442807	0.482563	0.482889
2215	0.444074	0.484176	0.485395
2216	0.445341	0.485786	0.487921
2217	0.446452	0.487282	0.490442
2218	0.447529	0.488758	0.492957
2219	0.448454	0.490228	0.495549
2220	0.449344	0.491686	0.498148
2221	0.450061	0.492908	0.500556
2222	0.45072	0.49405	0.502903
2223	0.451182	0.495013	0.505103
2224	0.451554	0.495901	0.507234
2225	0.45177	0.496649	0.509256
2226	0.451903	0.497316	0.511226
2227	0.451927	0.497862	0.513113
2228	0.451871	0.498312	0.514925
2229	0.4517	0.498666	0.516594
2230	0.45142	0.498929	0.518119
2231	0.451055	0.499097	0.519548
2232	0.450595	0.499159	0.520861
2233	0.450119	0.49918	0.522103
2234	0.449647	0.499158	0.523232
2235	0.449133	0.499077	0.524318
2236	0.448571	0.498904	0.525328
2237	0.448012	0.498732	0.526278
2238	0.447484	0.498592	0.527089
2239	0.446977	0.498452	0.527882
2240	0.446557	0.498301	0.528602
2241	0.446152	0.498164	0.529314
2242	0.445847	0.498133	0.529983
2243	0.445547	0.49811	0.530663
2244	0.445359	0.498169	0.531407
2245	0.445188	0.498239	0.532153
2246	0.445216	0.498461	0.532883
2247	0.44525	0.49869	0.533619
2248	0.445382	0.498953	0.534342
2249	0.445522	0.49922	0.535071
2250	0.445737	0.499594	0.535855
2251	0.445952	0.499977	0.536651
2252	0.446263	0.500397	0.537438
2253	0.446584	0.500821	0.538228
2254	0.446899	0.501253	0.539004
2255	0.447207	0.501685	0.539778
2256	0.447575	0.502167	0.540502
2257	0.447964	0.502664	0.541218
2258	0.448347	0.503108	0.54193
2259	0.448729	0.503536	0.54265
2260	0.44912	0.503979	0.543331
2261	0.449519	0.50444	0.544003
2262	0.449872	0.50488	0.544622
2263	0.4502	0.505294	0.545206
2264	0.450583	0.505712	0.545777
2265	0.451006	0.506138	0.546343
2266	0.45135	0.506505	0.54681
2267	0.451635	0.506831	0.5472
2268	0.451967	0.507164	0.547571
2269	0.452346	0.507515	0.547934
2270	0.452712	0.507846	0.548282
2271	0.453059	0.50815	0.548608
2272	0.453398	0.508442	0.548918
2273	0.45373	0.508723	0.549207
2274	0.454066	0.508995	0.549429
2275	0.454402	0.509247	0.549551
2276	0.454759	0.509498	0.549664
2277	0.455152	0.509743	0.549756
2278	0.455523	0.509985	0.54983
2279	0.455832	0.510209	0.549858
2280	0.45612	0.510423	0.549868
2281	0.456352	0.510602	0.549838
2282	0.456575	0.510765	0.54978
2283	0.456769	0.510877	0.549653
2284	0.456952	0.51097	0.549503
2285	0.457068	0.510974	0.549258
2286	0.457169	0.510964	0.549005
2287	0.457199	0.510883	0.548724
2288	0.457219	0.510789	0.548428
2289	0.457176	0.510615	0.548064
2290	0.45712	0.510426	0.547689
2291	0.456935	0.510109	0.547226
2292	0.456735	0.509781	0.546742
2293	0.456372	0.509376	0.546066
2294	0.456	0.508962	0.545381
2295	0.455531	0.508464	0.544722
2296	0.455053	0.507957	0.544053
2297	0.454494	0.507339	0.543303
2298	0.453927	0.50671	0.542542
2299	0.453294	0.506032	0.541726
2300	0.452649	0.505342	0.540898
2301	0.451877	0.504563	0.539983
2302	0.451087	0.503768	0.539049
2303	0.450191	0.502855	0.538079
2304	0.449272	0.501918	0.537093
2305	0.448307	0.500864	0.53603
2306	0.447326	0.499781	0.534945
2307	0.446303	0.498779	0.53391
2308	0.445262	0.497781	0.532873
2309	0.44406	0.496672	0.531661
2310	0.442814	0.49553	0.5304
2311	0.441613	0.49438	0.529237
2312	0.440413	0.493219	0.528089
2313	0.43916	0.492024	0.526845
2314	0.437884	0.490813	0.525565
2315	0.436599	0.489521	0.524374
2316	0.435301	0.488194	0.523203
2317	0.433915	0.486826	0.521925
2318	0.43249	0.485434	0.520599
2319	0.431119	0.484218	0.519401
2320	0.42976	0.483068	0.518246
2321	0.428437	0.481855	0.517144
2322	0.427125	0.480608	0.516062
2323	0.425911	0.479448	0.515035
2324	0.42474	0.478323	0.514027
2325	0.42357	0.477216	0.512989
2326	0.422389	0.476108	0.511931
2327	0.421328	0.475029	0.510929
2328	0.420331	0.473964	0.509954
2329	0.419327	0.473012	0.509026
2330	0.418319	0.472126	0.508121
2331	0.417435	0.47129	0.507235
2332	0.416635	0.47049	0.506371
2333	0.415873	0.469739	0.505578
2334	0.415136	0.469021	0.504833
2335	0.414491	0.468398	0.504124
2336	0.413919	0.467848	0.503434
2337	0.413414	0.467304	0.502734
2338	0.412962	0.46677	0.502022
2339	0.41262	0.466341	0.501406
2340	0.41237	0.465993	0.500875
2341	0.41212	0.465652	0.500385
2342	0.411871	0.465313	0.499919
2343	0.411719	0.465091	0.499502
2344	0.411682	0.465	0.499155
2345	0.411737	0.465017	0.498848
2346	0.411876	0.465155	0.498587
2347	0.412027	0.465246	0.498367
[truncated: 153 more rows]

## Sheet: Table S6
Table S6. VNIR-SWIR reflectance spectra corresponding to mechanic mixtures of illite-dickite reference minerals from the Athabasca Basin Mineral Standards database
Wavelength	I-D 20:80	I-D 60:40	I-D 80:20
350	0.122884	0.129126	0.133362
351	0.122617	0.128683	0.132487
352	0.121834	0.122136	0.123273
353	0.142584	0.142863	0.146073
354	0.15016	0.151239	0.155744
355	0.152642	0.156411	0.162513
356	0.158513	0.169641	0.1794
357	0.171908	0.181852	0.191436
358	0.182082	0.189578	0.196348
359	0.18386	0.190324	0.191516
360	0.1871	0.191906	0.198122
361	0.190226	0.197577	0.207781
362	0.19336	0.206475	0.218761
363	0.199793	0.205472	0.217245
364	0.204131	0.208816	0.219811
365	0.209393	0.215519	0.22619
366	0.223064	0.226369	0.239125
367	0.2231	0.226943	0.23597
368	0.22093	0.225671	0.2327
369	0.222268	0.226697	0.238227
370	0.230869	0.238661	0.245415
371	0.235891	0.244289	0.250709
372	0.236316	0.242081	0.253794
373	0.237429	0.244514	0.254627
374	0.239219	0.247137	0.256599
375	0.240396	0.248438	0.257733
376	0.236462	0.24262	0.251205
377	0.237842	0.243232	0.252302
378	0.240981	0.246672	0.256446
379	0.244068	0.251564	0.261644
380	0.244357	0.254133	0.261626
381	0.244243	0.253937	0.261861
382	0.244156	0.250908	0.263327
383	0.24656	0.255783	0.264907
384	0.248114	0.25815	0.265287
385	0.249401	0.259188	0.265486
386	0.252804	0.263081	0.269738
387	0.254375	0.264878	0.27294
388	0.254507	0.265617	0.274735
389	0.252888	0.265888	0.274143
390	0.254412	0.265827	0.275276
391	0.256742	0.266812	0.2773
392	0.259404	0.269339	0.280134
393	0.259509	0.269603	0.279685
394	0.260594	0.270946	0.28118
395	0.262402	0.273042	0.283989
396	0.263304	0.273896	0.284276
397	0.263364	0.273921	0.283818
398	0.263448	0.274086	0.283624
399	0.264803	0.27587	0.285279
400	0.265711	0.277345	0.286821
401	0.26649	0.278322	0.287912
402	0.267259	0.278654	0.288358
403	0.268075	0.279679	0.289392
404	0.268698	0.28028	0.290177
405	0.269097	0.280441	0.290668
406	0.268924	0.28058	0.290801
407	0.269437	0.281288	0.291547
408	0.270227	0.282221	0.29258
409	0.270705	0.282888	0.29351
410	0.271067	0.283518	0.294394
411	0.271826	0.284351	0.295309
412	0.273409	0.285607	0.296333
413	0.273284	0.285738	0.296499
414	0.273318	0.285666	0.296865
415	0.273731	0.285569	0.297577
416	0.274528	0.28749	0.299329
417	0.275186	0.288379	0.300325
418	0.275829	0.288658	0.300767
419	0.276841	0.289094	0.300797
420	0.277612	0.290012	0.301778
421	0.277807	0.290644	0.302644
422	0.276922	0.290284	0.302535
423	0.277884	0.291254	0.303597
424	0.279204	0.292534	0.304912
425	0.280615	0.293945	0.306318
426	0.281237	0.294485	0.306924
427	0.282005	0.29515	0.307651
428	0.282901	0.29596	0.308487
429	0.283929	0.297113	0.309451
430	0.284244	0.297716	0.3101
431	0.284588	0.298242	0.310809
432	0.285838	0.29919	0.312058
433	0.286882	0.300782	0.313169
434	0.287864	0.302087	0.314278
435	0.288822	0.3028	0.315427
436	0.289689	0.303678	0.315881
437	0.290459	0.304598	0.316686
438	0.291157	0.305541	0.31781
439	0.291921	0.306442	0.318891
440	0.29257	0.307071	0.319576
441	0.293182	0.307659	0.320177
442	0.293877	0.308565	0.321165
443	0.294512	0.308969	0.321922
444	0.295228	0.309523	0.322578
445	0.296116	0.310549	0.323162
446	0.296803	0.3112	0.324335
447	0.297447	0.311813	0.325317
448	0.29803	0.312399	0.32605
449	0.298093	0.312725	0.326472
450	0.29885	0.313681	0.327414
451	0.299813	0.314852	0.328508
452	0.30007	0.315496	0.329064
453	0.300788	0.31613	0.329838
454	0.301574	0.316834	0.33077
455	0.30222	0.31769	0.331888
456	0.302232	0.317899	0.331854
457	0.302497	0.3183	0.332257
458	0.303129	0.319001	0.333291
459	0.30387	0.319827	0.334264
460	0.30409	0.320299	0.334833
461	0.304066	0.320569	0.33516
462	0.304501	0.320959	0.335576
463	0.30496	0.321548	0.33624
464	0.305385	0.322067	0.336917
465	0.305722	0.322279	0.337431
466	0.306331	0.322901	0.338197
467	0.306748	0.323496	0.338944
468	0.306873	0.323977	0.33962
469	0.307299	0.324262	0.339941
470	0.307765	0.324766	0.340514
471	0.308196	0.325412	0.341222
472	0.308225	0.325918	0.341605
473	0.308376	0.326135	0.341901
474	0.30868	0.326395	0.342306
475	0.309272	0.327098	0.343115
476	0.309936	0.327648	0.343849
477	0.310331	0.328183	0.344361
478	0.310328	0.328745	0.344583
479	0.311278	0.329461	0.345531
480	0.311876	0.33001	0.346319
481	0.312183	0.330428	0.346941
482	0.312803	0.330993	0.347501
483	0.313499	0.331827	0.348338
484	0.314139	0.332644	0.349175
485	0.314496	0.333012	0.349602
486	0.315031	0.333658	0.350252
487	0.315682	0.334385	0.351039
488	0.316466	0.335147	0.351977
489	0.317079	0.335777	0.352745
490	0.317616	0.336488	0.35345
491	0.318111	0.337277	0.354117
492	0.318877	0.33797	0.354976
493	0.319432	0.338535	0.355604
494	0.319883	0.33903	0.356134
495	0.320406	0.339546	0.356788
496	0.321254	0.340425	0.357669
497	0.322105	0.341302	0.358592
498	0.322788	0.341979	0.35948
499	0.323386	0.342588	0.360097
500	0.324061	0.343297	0.36083
501	0.324829	0.344126	0.361723
502	0.325537	0.344995	0.362578
503	0.32623	0.3457	0.363415
504	0.326921	0.346318	0.364235
505	0.327673	0.347037	0.365062
506	0.328383	0.347817	0.365835
507	0.329074	0.34857	0.366584
508	0.32977	0.349228	0.367335
509	0.330472	0.350076	0.368227
510	0.331134	0.350904	0.369046
511	0.331748	0.35167	0.369749
512	0.332457	0.352374	0.370544
513	0.333297	0.353205	0.371461
514	0.334207	0.354108	0.372445
515	0.334967	0.354881	0.373291
516	0.33566	0.355564	0.374061
517	0.336384	0.356305	0.374864
518	0.337285	0.357325	0.375861
519	0.33803	0.35809	0.376646
520	0.338741	0.35883	0.377427
521	0.339452	0.359609	0.378271
522	0.340127	0.360391	0.379018
523	0.340791	0.361118	0.379725
524	0.341456	0.361799	0.380423
525	0.342217	0.362503	0.381305
526	0.342949	0.363276	0.382099
527	0.343661	0.364056	0.382854
528	0.344368	0.364767	0.383634
529	0.345249	0.365611	0.384529
530	0.346126	0.366471	0.385428
531	0.346934	0.36731	0.3863
532	0.347717	0.368116	0.387159
533	0.348475	0.368932	0.387982
534	0.349218	0.369761	0.388776
535	0.350039	0.370637	0.389676
536	0.350887	0.371518	0.390546
537	0.35176	0.372417	0.391428
538	0.352683	0.373387	0.392442
539	0.353717	0.374459	0.39352
540	0.354771	0.375548	0.394596
541	0.355807	0.376614	0.395636
542	0.35687	0.377831	0.396771
543	0.357865	0.378958	0.397877
544	0.358773	0.379954	0.398929
545	0.359481	0.380656	0.399672
546	0.360134	0.381241	0.400383
547	0.360745	0.38175	0.401056
548	0.361331	0.38227	0.401659
549	0.361878	0.382837	0.402275
550	0.362487	0.383481	0.402965
551	0.363276	0.384269	0.403825
552	0.36402	0.38507	0.404648
553	0.364775	0.385839	0.405472
554	0.365553	0.386564	0.406306
555	0.366364	0.387427	0.407178
556	0.367174	0.388258	0.408038
557	0.367983	0.389063	0.408903
558	0.368796	0.389867	0.40986
559	0.369696	0.390728	0.410783
560	0.370624	0.391622	0.411702
561	0.371534	0.392548	0.412652
562	0.372501	0.393512	0.4137
563	0.373435	0.394454	0.414695
564	0.374308	0.395352	0.415583
565	0.375158	0.396216	0.416524
566	0.375984	0.397053	0.417408
567	0.37678	0.397857	0.418232
568	0.377475	0.398566	0.41899
569	0.378164	0.399241	0.419735
570	0.37885	0.399908	0.420461
571	0.379535	0.400611	0.421145
572	0.380318	0.401387	0.42193
573	0.381161	0.402213	0.422797
574	0.382067	0.403098	0.423761
575	0.383115	0.404173	0.424847
576	0.384206	0.405275	0.425981
577	0.385325	0.40638	0.427143
578	0.386383	0.407373	0.428167
579	0.387392	0.408353	0.429171
580	0.388362	0.409306	0.430142
581	0.389301	0.410183	0.431029
582	0.390111	0.410948	0.431826
583	0.390877	0.411693	0.432599
584	0.391636	0.412466	0.433383
585	0.392507	0.413351	0.43428
586	0.393432	0.414276	0.435235
587	0.394405	0.415234	0.43624
588	0.395412	0.416286	0.437297
589	0.396418	0.417346	0.438385
590	0.397397	0.418391	0.439467
591	0.398247	0.419345	0.44042
592	0.399229	0.420377	0.441451
593	0.400225	0.421393	0.442491
594	0.401142	0.422306	0.443483
595	0.402013	0.423242	0.444386
596	0.402877	0.424177	0.445321
597	0.403742	0.425109	0.446317
598	0.404576	0.425979	0.447219
599	0.405346	0.426765	0.448044
600	0.406071	0.427493	0.448815
601	0.406813	0.428258	0.44961
602	0.407497	0.429003	0.450332
603	0.408163	0.429755	0.451071
604	0.40885	0.430547	0.45194
605	0.409486	0.431346	0.45273
606	0.410145	0.432154	0.45354
607	0.410859	0.432973	0.454407
608	0.411523	0.433666	0.455124
609	0.412249	0.434428	0.455876
610	0.413016	0.43523	0.456646
611	0.41366	0.435819	0.457258
612	0.414049	0.436145	0.457608
613	0.414292	0.436289	0.45782
614	0.414471	0.436257	0.458007
615	0.414752	0.436442	0.458314
616	0.415049	0.436692	0.458675
617	0.415329	0.436957	0.459077
618	0.415706	0.437268	0.459448
619	0.416088	0.437627	0.459838
620	0.416466	0.438026	0.460246
621	0.416816	0.438346	0.46064
622	0.417153	0.438598	0.460982
623	0.417494	0.438815	0.461303
624	0.417892	0.439053	0.461653
625	0.418259	0.439294	0.461976
626	0.418633	0.439541	0.462304
627	0.419042	0.4398	0.462663
628	0.419473	0.440068	0.462981
629	0.41992	0.440399	0.463333
630	0.420382	0.4408	0.463733
631	0.42091	0.441284	0.464294
632	0.421385	0.441684	0.464801
633	0.421827	0.442036	0.465264
634	0.422282	0.442426	0.465687
635	0.422705	0.442834	0.466133
636	0.423069	0.443196	0.46655
637	0.423329	0.44344	0.466891
638	0.423671	0.443799	0.467314
639	0.423991	0.444185	0.467746
640	0.42427	0.444584	0.468173
641	0.424518	0.444991	0.468588
642	0.424815	0.44545	0.469032
643	0.425134	0.445944	0.469491
644	0.425372	0.44643	0.469936
645	0.425619	0.446865	0.470423
646	0.425883	0.447292	0.470912
647	0.426184	0.447759	0.471368
648	0.426498	0.448223	0.471857
649	0.426822	0.448697	0.472355
650	0.427158	0.449191	0.472861
651	0.427477	0.449634	0.473344
652	0.42784	0.450091	0.473851
653	0.428234	0.450558	0.474374
654	0.428565	0.45099	0.47482
655	0.428972	0.451463	0.475346
656	0.429399	0.451938	0.47588
657	0.429782	0.45236	0.476312
658	0.430209	0.452757	0.476779
659	0.430636	0.453168	0.477269
660	0.431045	0.453613	0.477787
661	0.431473	0.454085	0.478287
662	0.431911	0.454534	0.478805
663	0.43236	0.45496	0.479342
664	0.432831	0.455414	0.479842
665	0.433279	0.455883	0.480371
666	0.433713	0.456368	0.480913
667	0.434149	0.456896	0.48145
668	0.434615	0.457377	0.482001
669	0.435096	0.457857	0.482555
670	0.435589	0.458365	0.483105
671	0.436068	0.458841	0.48365
672	0.436558	0.459358	0.484216
673	0.437062	0.459922	0.484806
674	0.437597	0.460452	0.485382
675	0.438097	0.460962	0.485929
676	0.438588	0.461475	0.486474
677	0.439145	0.462071	0.487097
678	0.439666	0.462604	0.487688
679	0.440181	0.463111	0.488253
680	0.440718	0.463614	0.488791
681	0.441256	0.464203	0.489408
682	0.441764	0.464747	0.490012
683	0.442234	0.465217	0.490585
684	0.442717	0.465694	0.491112
685	0.44324	0.466217	0.491685
686	0.443787	0.466771	0.492282
687	0.4443	0.467314	0.492826
688	0.444845	0.467841	0.493414
689	0.445401	0.468374	0.494011
690	0.445953	0.468944	0.494588
691	0.446519	0.469519	0.495209
692	0.447072	0.470077	0.495814
693	0.447604	0.470609	0.496385
694	0.44812	0.471121	0.496944
695	0.448642	0.471628	0.497503
696	0.44917	0.472137	0.498069
697	0.44971	0.472696	0.498665
698	0.450272	0.473277	0.499265
699	0.450825	0.473847	0.499852
700	0.451322	0.474355	0.5004
701	0.451855	0.474931	0.500989
702	0.452383	0.4755	0.501578
703	0.452888	0.476029	0.502149
704	0.453497	0.476627	0.50284
705	0.454075	0.477194	0.503458
706	0.454612	0.477723	0.503997
707	0.455116	0.478224	0.504572
708	0.455636	0.478737	0.505113
709	0.456158	0.479247	0.505639
710	0.456647	0.479717	0.506182
711	0.457135	0.480212	0.506688
712	0.457613	0.480703	0.507187
713	0.458073	0.481174	0.507698
714	0.458512	0.481602	0.508187
715	0.458966	0.482059	0.508688
716	0.459438	0.482552	0.509205
717	0.459906	0.482976	0.509735
718	0.460351	0.48339	0.510217
719	0.460791	0.483816	0.510687
720	0.461286	0.484339	0.511252
721	0.461736	0.484806	0.511749
722	0.462172	0.485265	0.512223
723	0.462614	0.485749	0.512703
724	0.463057	0.486193	0.513149
725	0.463473	0.486599	0.513594
726	0.463855	0.486964	0.514044
727	0.464334	0.487457	0.514518
728	0.464786	0.487939	0.515009
729	0.465206	0.488394	0.515496
730	0.465545	0.48874	0.515889
731	0.465883	0.489075	0.516275
732	0.466207	0.489396	0.516651
733	0.466499	0.489691	0.517007
734	0.466778	0.48996	0.51733
735	0.467057	0.490228	0.517644
736	0.46734	0.490502	0.517956
737	0.467585	0.490787	0.5183
738	0.467906	0.491141	0.518697
739	0.468294	0.491549	0.519136
740	0.468689	0.491917	0.519548
741	0.469068	0.492264	0.519963
742	0.469451	0.492625	0.520411
743	0.469868	0.493059	0.520957
744	0.470226	0.493481	0.521382
745	0.470559	0.493866	0.521771
746	0.470876	0.494194	0.522152
747	0.47118	0.494497	0.522492
748	0.471507	0.494844	0.522904
749	0.471855	0.495235	0.523386
750	0.47215	0.495596	0.52382
751	0.472506	0.495965	0.524242
752	0.472906	0.496356	0.524687
753	0.473353	0.496816	0.525251
754	0.47369	0.497217	0.525675
755	0.473994	0.49759	0.526076
756	0.474297	0.497941	0.526513
757	0.474614	0.498319	0.526884
758	0.474968	0.498701	0.527315
759	0.475358	0.499084	0.527819
760	0.475632	0.499445	0.528239
761	0.475933	0.499811	0.528661
762	0.476242	0.500171	0.529075
763	0.476497	0.500484	0.52945
764	0.47674	0.500781	0.529796
765	0.476993	0.501086	0.530163
766	0.477278	0.501423	0.5306
767	0.477564	0.501723	0.530975
768	0.477811	0.502006	0.531329
769	0.478007	0.502274	0.53167
770	0.47815	0.502481	0.531958
771	0.478335	0.502684	0.532264
772	0.478553	0.502898	0.532586
773	0.478783	0.503187	0.532931
774	0.478936	0.503386	0.53321
775	0.47907	0.503572	0.533464
776	0.47924	0.503825	0.533731
777	0.479339	0.503922	0.53393
778	0.479431	0.504053	0.534158
779	0.479534	0.504279	0.534446
780	0.479573	0.504348	0.534638
781	0.479679	0.504493	0.534873
782	0.47983	0.504693	0.535137
783	0.479863	0.504768	0.535287
784	0.479904	0.50486	0.535489
785	0.479951	0.504961	0.535707
786	0.480005	0.505063	0.535891
787	0.480117	0.505251	0.536137
788	0.480168	0.505392	0.536338
789	0.480089	0.505414	0.536436
790	0.480118	0.50553	0.536576
791	0.480204	0.50566	0.536769
792	0.480334	0.505794	0.537005
793	0.480355	0.505871	0.537156
794	0.480359	0.505947	0.537282
795	0.480364	0.506032	0.537414
796	0.480413	0.506155	0.537621
797	0.480481	0.506274	0.537797
798	0.48057	0.506421	0.538008
799	0.480689	0.506626	0.538305
800	0.480705	0.506767	0.538566
801	0.480738	0.506878	0.538758
802	0.480801	0.506964	0.538881
803	0.4808	0.507063	0.539078
804	0.48073	0.507047	0.539153
805	0.480631	0.506973	0.539165
806	0.480624	0.506993	0.539283
807	0.480702	0.507146	0.539484
808	0.48083	0.507369	0.539752
809	0.481005	0.507645	0.540107
810	0.481188	0.507874	0.540453
811	0.481386	0.50812	0.540801
812	0.481602	0.508394	0.541152
813	0.481763	0.508588	0.541457
814	0.481885	0.508753	0.541739
815	0.481971	0.508897	0.541998
816	0.482021	0.509039	0.542215
817	0.482127	0.50919	0.542464
818	0.482249	0.509336	0.542713
819	0.482343	0.509461	0.542924
820	0.482389	0.509649	0.543144
821	0.482416	0.509814	0.543359
822	0.48243	0.509929	0.543563
823	0.482542	0.51005	0.543735
824	0.482612	0.510148	0.543917
825	0.482648	0.510233	0.544114
826	0.482733	0.510392	0.544369
827	0.482824	0.510559	0.544593
828	0.482892	0.51071	0.544791
829	0.482874	0.510792	0.544948
830	0.482911	0.510926	0.545152
831	0.482987	0.511074	0.545361
832	0.483107	0.511223	0.545557
833	0.483197	0.51138	0.545772
834	0.483277	0.511549	0.546013
835	0.483353	0.51173	0.546277
836	0.483462	0.511895	0.546523
837	0.483553	0.512041	0.546743
838	0.48363	0.512165	0.546947
839	0.483687	0.512242	0.547146
840	0.483785	0.512408	0.547367
841	0.483888	0.512588	0.547593
842	0.483975	0.512739	0.547815
843	0.484037	0.512843	0.547991
844	0.484085	0.512943	0.548167
845	0.48412	0.513043	0.548342
846	0.484188	0.51311	0.548444
847	0.48425	0.513195	0.548608
848	0.484306	0.513299	0.548812
849	0.484352	0.513448	0.549018
850	0.484413	0.513551	0.549202
851	0.484495	0.513641	0.549388
852	0.484613	0.51374	0.549593
853	0.484639	0.513833	0.54978
854	0.484683	0.513947	0.549947
855	0.484769	0.514088	0.550091
856	0.484768	0.514173	0.550187
857	0.484815	0.514259	0.550333
858	0.484896	0.514347	0.550514
859	0.484961	0.514425	0.550679
860	0.48501	0.514524	0.550833
861	0.485059	0.514648	0.550996
862	0.485127	0.514817	0.551197
863	0.485221	0.514941	0.551378
864	0.485296	0.515042	0.55153
865	0.485337	0.515121	0.551643
866	0.485402	0.515205	0.551812
867	0.485538	0.515356	0.55206
868	0.485719	0.515553	0.552355
869	0.485762	0.515662	0.552481
870	0.485832	0.515801	0.552643
871	0.485943	0.515986	0.552856
872	0.48615	0.516269	0.553174
873	0.486257	0.516428	0.553401
874	0.486368	0.516587	0.553608
875	0.486526	0.516797	0.553819
876	0.486656	0.516938	0.554054
877	0.486823	0.517156	0.554323
878	0.48702	0.517444	0.554618
879	0.487129	0.517594	0.554816
880	0.487288	0.517778	0.555071
881	0.487478	0.517973	0.555359
882	0.487676	0.51814	0.555648
883	0.487865	0.518398	0.555903
884	0.488069	0.518685	0.556188
885	0.488311	0.518973	0.556548
886	0.488494	0.519151	0.556802
887	0.488705	0.5194	0.557102
888	0.488954	0.519737	0.557466
889	0.489156	0.519943	0.55776
890	0.489301	0.520073	0.557982
891	0.489434	0.520191	0.558174
892	0.489688	0.520483	0.558454
893	0.489914	0.520756	0.558798
894	0.490119	0.520997	0.559122
895	0.490294	0.521181	0.559344
896	0.490482	0.521409	0.559604
897	0.490651	0.521605	0.559854
898	0.490793	0.521749	0.560084
899	0.490998	0.521902	0.5604
900	0.491197	0.5221	0.560655
901	0.491384	0.522332	0.560864
902	0.491536	0.522554	0.561084
903	0.491675	0.52276	0.561304
904	0.491854	0.522962	0.561566
905	0.492153	0.523169	0.56194
906	0.492359	0.523423	0.56217
907	0.492531	0.523647	0.562388
908	0.492682	0.523813	0.56263
909	0.492914	0.524052	0.562962
910	0.49316	0.524362	0.563273
911	0.493413	0.524717	0.563563
912	0.493642	0.52495	0.56385
913	0.493941	0.525238	0.564216
914	0.494239	0.52553	0.564594
915	0.494419	0.525748	0.564884
916	0.494594	0.52601	0.565133
917	0.494816	0.52628	0.565415
918	0.495124	0.526547	0.565771
919	0.495319	0.526746	0.566018
920	0.495576	0.527036	0.566342
921	0.4959	0.527413	0.566744
922	0.496178	0.527704	0.567082
923	0.496446	0.527989	0.567399
924	0.496699	0.528282	0.567711
925	0.496913	0.528612	0.568045
926	0.497239	0.528921	0.568421
927	0.497575	0.529222	0.568799
928	0.497862	0.52952	0.569151
929	0.498203	0.52985	0.569485
930	0.498513	0.530174	0.569836
931	0.498778	0.530485	0.57021
932	0.499038	0.530755	0.570584
933	0.499343	0.531095	0.570943
934	0.499678	0.53147	0.571294
935	0.5	0.53179	0.571653
936	0.50027	0.532051	0.571921
937	0.500556	0.532328	0.572199
938	0.500918	0.532688	0.572568
939	0.50115	0.532953	0.572913
940	0.501367	0.533182	0.573205
941	0.50159	0.533383	0.573435
942	0.501849	0.533664	0.57379
943	0.502126	0.533926	0.574092
944	0.502414	0.534184	0.574368
945	0.502687	0.534496	0.574725
946	0.50294	0.534731	0.57504
947	0.50322	0.534956	0.575343
948	0.503594	0.53524	0.57566
949	0.503886	0.535555	0.575977
950	0.504205	0.535863	0.576272
951	0.504586	0.536152	0.576533
952	0.504747	0.536419	0.57682
953	0.504983	0.536658	0.577115
954	0.505295	0.536878	0.577416
955	0.50563	0.537128	0.577707
956	0.505919	0.537412	0.577983
957	0.506171	0.537686	0.578241
958	0.506377	0.537866	0.578458
959	0.506706	0.538275	0.57879
960	0.506977	0.538587	0.579079
961	0.507093	0.53863	0.579242
962	0.507378	0.538842	0.579532
963	0.507652	0.539104	0.579795
964	0.5079	0.539388	0.580014
965	0.508108	0.539443	0.580105
966	0.508269	0.539621	0.580349
967	0.508429	0.539889	0.58069
968	0.508683	0.540221	0.581056
969	0.508968	0.540553	0.581435
970	0.509259	0.540885	0.581847
971	0.509542	0.541213	0.582314
972	0.510054	0.541692	0.582833
973	0.510512	0.542182	0.583388
974	0.510882	0.542664	0.583976
975	0.511309	0.543109	0.584473
976	0.511729	0.543596	0.584934
977	0.512118	0.54409	0.585366
978	0.512355	0.544465	0.585768
979	0.512677	0.544781	0.586089
980	0.513056	0.545138	0.586455
981	0.513487	0.545635	0.586991
982	0.512193	0.544177	0.585592
983	0.512476	0.544467	0.585887
984	0.512745	0.544813	0.586155
985	0.513014	0.54515	0.586398
986	0.513265	0.545502	0.586636
987	0.513459	0.545839	0.586871
988	0.513658	0.54614	0.587087
989	0.513908	0.546472	0.587316
990	0.514156	0.546735	0.587537
991	0.514416	0.546923	0.587755
992	0.51471	0.547175	0.588025
993	0.514964	0.5475	0.588308
994	0.515182	0.547794	0.588522
995	0.515403	0.548036	0.588679
996	0.51561	0.548244	0.588843
997	0.515785	0.54843	0.589018
998	0.515947	0.548618	0.589183
999	0.516098	0.548806	0.589337
1000	0.516243	0.54898	0.589469
1001	0.516406	0.549173	0.589569
1002	0.516582	0.549372	0.589695
1003	0.516778	0.549591	0.589917
1004	0.516958	0.549803	0.590165
1005	0.517109	0.549994	0.590325
1006	0.517231	0.550144	0.590447
1007	0.517348	0.550265	0.590608
1008	0.517477	0.550376	0.590739
1009	0.517579	0.550466	0.590823
1010	0.51767	0.550571	0.590969
1011	0.517789	0.550691	0.591205
1012	0.517904	0.550766	0.591402
1013	0.517986	0.550797	0.591502
1014	0.51809	0.550867	0.591615
1015	0.518211	0.550991	0.59181
1016	0.518297	0.551114	0.592016
1017	0.518412	0.551241	0.592237
1018	0.518532	0.551359	0.592452
1019	0.518606	0.551428	0.592612
1020	0.518701	0.551523	0.592805
1021	0.518845	0.551647	0.593052
1022	0.518996	0.55174	0.593288
1023	0.519095	0.551812	0.593484
1024	0.519134	0.551889	0.593649
1025	0.519184	0.551976	0.593818
1026	0.519315	0.552099	0.594032
1027	0.519476	0.552255	0.594272
1028	0.519553	0.552371	0.594462
1029	0.519587	0.552468	0.594622
1030	0.519668	0.552574	0.594791
1031	0.519762	0.552676	0.594983
1032	0.519869	0.55283	0.595195
1033	0.519988	0.552952	0.595354
1034	0.52011	0.553039	0.595504
1035	0.520197	0.553166	0.59571
1036	0.520264	0.553326	0.595932
1037	0.520352	0.553488	0.5961
1038	0.52046	0.553621	0.596223
1039	0.52057	0.553744	0.596333
1040	0.520669	0.553885	0.596465
1041	0.520737	0.554013	0.596611
1042	0.520787	0.554118	0.596742
1043	0.520886	0.554284	0.596846
1044	0.521007	0.554451	0.596958
1045	0.521085	0.554592	0.597054
1046	0.521173	0.554791	0.597154
1047	0.521276	0.554964	0.597248
1048	0.521364	0.555065	0.597335
1049	0.521446	0.555181	0.597427
1050	0.521527	0.555315	0.5975
1051	0.521603	0.555446	0.59757
1052	0.521675	0.555583	0.597641
1053	0.521753	0.55572	0.597706
1054	0.521833	0.555823	0.597739
1055	0.5219	0.55591	0.597757
1056	0.521911	0.555988	0.597721
1057	0.521889	0.556038	0.597645
1058	0.521868	0.556088	0.597617
1059	0.52188	0.556157	0.597643
1060	0.521951	0.556221	0.597678
1061	0.522036	0.556256	0.597704
1062	0.522064	0.556267	0.597701
1063	0.522033	0.556275	0.597657
1064	0.522002	0.556272	0.597619
1065	0.52194	0.556231	0.597628
1066	0.521871	0.556191	0.59764
1067	0.521843	0.556179	0.597614
1068	0.521838	0.556169	0.597582
1069	0.521836	0.556117	0.597576
1070	0.521818	0.556047	0.597569
1071	0.521764	0.556005	0.59751
1072	0.521715	0.555973	0.597449
1073	0.521703	0.55595	0.597503
1074	0.521708	0.555956	0.597627
1075	0.521702	0.555933	0.597696
1076	0.521666	0.555843	0.597687
1077	0.521637	0.555763	0.597694
1078	0.52161	0.555684	0.597753
1079	0.521556	0.555583	0.597803
1080	0.521503	0.555521	0.597882
1081	0.521467	0.555478	0.597972
1082	0.521423	0.5554	0.598019
1083	0.521371	0.555307	0.598054
1084	0.521341	0.555245	0.598139
1085	0.521313	0.555191	0.598233
1086	0.521281	0.555117	0.598334
1087	0.521252	0.555041	0.598436
1088	0.521242	0.554998	0.598516
1089	0.521233	0.554956	0.598596
1090	0.521213	0.554877	0.598678
1091	0.52121	0.554791	0.598763
1092	0.521203	0.554722	0.598862
1093	0.521186	0.554702	0.599019
1094	0.521162	0.554678	0.599157
1095	0.521157	0.554631	0.599226
1096	0.521171	0.554589	0.599311
1097	0.521178	0.55454	0.599418
1098	0.521171	0.554485	0.599511
1099	0.52114	0.554441	0.599577
1100	0.52111	0.554406	0.599648
1101	0.521116	0.554451	0.599765
1102	0.521139	0.554507	0.599886
1103	0.521152	0.554512	0.599948
1104	0.521162	0.554504	0.599984
1105	0.521154	0.554509	0.600021
1106	0.521117	0.554507	0.600064
1107	0.521089	0.554509	0.600108
1108	0.521087	0.554532	0.600143
1109	0.521075	0.554567	0.600181
1110	0.521075	0.554619	0.600218
1111	0.52109	0.554668	0.600246
1112	0.521141	0.554741	0.600238
1113	0.521188	0.554815	0.600226
1114	0.521195	0.554892	0.600204
1115	0.521196	0.554968	0.600184
1116	0.52121	0.555033	0.600167
1117	0.521229	0.555085	0.600147
1118	0.521231	0.555154	0.600111
1119	0.521228	0.555243	0.600069
1120	0.521213	0.555302	0.600025
1121	0.521184	0.555345	0.599999
1122	0.521154	0.55539	0.599965
1123	0.521125	0.555407	0.599908
1124	0.521106	0.555436	0.599868
1125	0.521126	0.555515	0.599873
1126	0.521143	0.555596	0.599867
1127	0.521147	0.555675	0.599814
1128	0.521154	0.555744	0.599765
1129	0.521142	0.555738	0.599721
1130	0.521126	0.555729	0.599676
1131	0.521074	0.555723	0.59959
1132	0.521015	0.555715	0.599496
1133	0.520955	0.555693	0.599435
1134	0.520899	0.555677	0.599391
1135	0.520866	0.555648	0.599328
1136	0.52085	0.555613	0.599262
1137	0.520824	0.555613	0.599203
1138	0.520775	0.555629	0.599133
1139	0.52073	0.555623	0.59909
1140	0.520697	0.555588	0.599092
1141	0.520643	0.555532	0.599075
1142	0.520547	0.555443	0.599014
1143	0.520466	0.555358	0.59896
1144	0.520428	0.555288	0.598934
1145	0.520391	0.555221	0.598909
1146	0.520348	0.555149	0.598891
1147	0.520305	0.555079	0.598874
1148	0.520285	0.555096	0.5989
1149	0.520271	0.555126	0.598931
1150	0.520239	0.555095	0.598968
1151	0.520208	0.55505	0.599007
1152	0.520185	0.555028	0.599044
1153	0.520153	0.555016	0.599072
1154	0.520106	0.554978	0.599092
1155	0.520053	0.554918	0.599104
1156	0.520011	0.55486	0.599122
1157	0.519989	0.554817	0.599156
1158	0.51995	0.554773	0.599191
1159	0.51988	0.554727	0.599225
1160	0.519818	0.554686	0.59925
1161	0.519781	0.554639	0.599258
1162	0.519751	0.554596	0.599277
1163	0.519776	0.554602	0.599367
1164	0.519799	0.554608	0.599453
1165	0.51976	0.554581	0.599481
1166	0.519717	0.554551	0.599504
1167	0.519695	0.554536	0.599546
1168	0.519677	0.554527	0.59959
1169	0.519636	0.554494	0.599612
1170	0.519587	0.554455	0.599628
1171	0.519559	0.554408	0.599657
1172	0.519541	0.554352	0.599688
1173	0.519522	0.554323	0.599728
1174	0.519512	0.554321	0.599779
1175	0.519498	0.554323	0.599817
1176	0.519477	0.554337	0.599833
1177	0.519468	0.554353	0.599853
1178	0.519479	0.554364	0.599888
1179	0.519478	0.554369	0.599915
1180	0.519437	0.554359	0.599906
1181	0.519401	0.554352	0.599901
1182	0.519417	0.554376	0.599948
1183	0.519433	0.554399	0.599996
1184	0.519415	0.554387	0.600011
1185	0.519394	0.554371	0.600024
1186	0.519398	0.554387	0.600059
1187	0.519409	0.55441	0.600096
1188	0.519391	0.554403	0.600089
1189	0.51936	0.554385	0.600068
1190	0.519328	0.554371	0.600055
1191	0.519292	0.554359	0.600046
1192	0.519263	0.554356	0.600035
1193	0.519243	0.554365	0.600028
1194	0.519224	0.554361	0.600019
1195	0.519202	0.554335	0.600002
1196	0.519177	0.554309	0.599986
1197	0.519144	0.554287	0.599975
1198	0.519115	0.554266	0.599961
1199	0.519108	0.554248	0.599928
1200	0.519098	0.554229	0.599895
1201	0.519037	0.554209	0.599877
1202	0.518977	0.554189	0.599859
1203	0.518953	0.554167	0.599851
1204	0.518933	0.554144	0.599845
1205	0.518868	0.554097	0.599792
1206	0.518792	0.554044	0.599727
1207	0.518738	0.55398	0.599681
1208	0.518694	0.553915	0.599644
1209	0.51865	0.55387	0.599614
1210	0.518609	0.553839	0.599588
1211	0.51855	0.553779	0.599537
1212	0.518471	0.55369	0.59946
1213	0.518395	0.553612	0.599383
1214	0.518322	0.553552	0.599308
1215	0.51825	0.553485	0.599241
1216	0.518181	0.553405	0.599191
1217	0.518112	0.553324	0.599137
1218	0.518036	0.553232	0.599056
1219	0.517961	0.553141	0.598973
1220	0.517889	0.553061	0.598868
1221	0.517818	0.552982	0.598764
1222	0.517726	0.552907	0.598699
1223	0.517634	0.552834	0.598636
1224	0.517557	0.552754	0.598569
1225	0.517484	0.552672	0.598502
1226	0.517409	0.552581	0.598424
1227	0.517333	0.552487	0.598342
1228	0.517266	0.5524	0.598284
1229	0.517204	0.552318	0.598239
1230	0.517131	0.552224	0.598179
1231	0.517049	0.552122	0.598108
1232	0.516968	0.55202	0.598034
1233	0.51689	0.551918	0.597957
1234	0.51681	0.551813	0.597882
1235	0.516729	0.551702	0.597812
1236	0.516648	0.551594	0.597746
1237	0.516568	0.551491	0.597695
1238	0.516489	0.551389	0.597642
1239	0.516415	0.551293	0.597579
1240	0.516342	0.551198	0.597517
1241	0.516281	0.551135	0.59748
1242	0.516221	0.551072	0.597443
1243	0.516214	0.551013	0.597436
1244	0.516209	0.550955	0.597432
1245	0.516164	0.550898	0.597408
1246	0.516114	0.550842	0.597381
1247	0.516093	0.550804	0.597386
1248	0.516083	0.550772	0.597403
1249	0.516069	0.550752	0.597427
1250	0.516054	0.550738	0.597457
1251	0.51604	0.550713	0.597471
1252	0.516029	0.550679	0.597473
1253	0.51602	0.550651	0.597496
1254	0.516012	0.550631	0.597544
1255	0.516008	0.550611	0.597579
1256	0.51601	0.550593	0.597593
1257	0.516012	0.550579	0.597616
1258	0.516019	0.550574	0.59766
1259	0.516028	0.550562	0.597705
1260	0.516049	0.550516	0.597754
1261	0.51607	0.550472	0.597802
1262	0.516089	0.550464	0.597844
1263	0.516109	0.550456	0.597887
1264	0.516124	0.550466	0.597953
1265	0.516139	0.550477	0.598018
1266	0.516141	0.550494	0.598049
1267	0.516142	0.550512	0.598077
1268	0.516151	0.550533	0.598128
1269	0.516162	0.550554	0.598185
1270	0.51616	0.550573	0.598234
1271	0.516152	0.550593	0.598279
1272	0.516137	0.550609	0.59831
1273	0.516117	0.550622	0.598332
1274	0.516102	0.55064	0.59836
1275	0.516093	0.550662	0.598393
1276	0.516073	0.55067	0.598408
1277	0.516038	0.550659	0.5984
1278	0.516015	0.550657	0.598398
1279	0.516014	0.550672	0.598407
1280	0.516008	0.550682	0.598417
1281	0.51599	0.550674	0.59843
1282	0.515969	0.550665	0.598438
1283	0.515936	0.550649	0.598422
1284	0.515903	0.550636	0.598405
1285	0.515882	0.55067	0.598389
1286	0.51586	0.550705	0.598372
1287	0.515831	0.550669	0.598323
1288	0.515801	0.550632	0.598273
1289	0.515763	0.550574	0.598212
1290	0.515724	0.550514	0.598151
1291	0.515677	0.550462	0.598093
1292	0.515628	0.550412	0.598036
1293	0.515566	0.550345	0.59797
1294	0.515501	0.550272	0.5979
1295	0.515445	0.550183	0.597821
1296	0.515395	0.550087	0.597738
1297	0.51532	0.549987	0.597644
1298	0.515227	0.549883	0.597541
1299	0.515135	0.549775	0.597438
1300	0.515047	0.549663	0.597334
1301	0.514961	0.549557	0.597237
1302	0.514875	0.549461	0.597149
1303	0.514782	0.549353	0.597052
1304	0.514676	0.549225	0.596938
1305	0.514575	0.549097	0.596818
1306	0.51449	0.548971	0.596683
1307	0.514411	0.548852	0.596555
1308	0.514357	0.54876	0.596465
1309	0.514298	0.548667	0.596373
1310	0.514198	0.54857	0.596271
1311	0.514099	0.548473	0.596169
1312	0.514045	0.548397	0.596104
1313	0.513991	0.548321	0.596039
1314	0.513952	0.548248	0.595961
1315	0.513915	0.548175	0.595882
1316	0.513865	0.548115	0.595821
1317	0.513812	0.548056	0.595762
1318	0.513745	0.547975	0.595681
1319	0.513674	0.547887	0.595591
1320	0.513583	0.547786	0.5955
1321	0.513483	0.547679	0.595408
1322	0.513406	0.547584	0.595355
1323	0.513343	0.547494	0.595328
1324	0.51326	0.547379	0.595262
1325	0.513158	0.547244	0.595162
1326	0.513073	0.547124	0.595076
1327	0.513009	0.54702	0.595004
1328	0.512949	0.546921	0.594938
1329	0.512898	0.546829	0.594879
1330	0.512846	0.546736	0.594818
1331	0.512792	0.546642	0.594757
1332	0.512738	0.546547	0.594701
1333	0.512689	0.546443	0.59466
1334	0.51264	0.54634	0.594621
1335	0.512584	0.546233	0.594588
1336	0.512527	0.546129	0.594554
1337	0.512469	0.546041	0.59453
1338	0.512411	0.545954	0.594506
1339	0.512342	0.545833	0.594451
1340	0.512274	0.545713	0.594396
1341	0.512198	0.545577	0.594315
1342	0.512121	0.545441	0.594234
1343	0.512037	0.545313	0.594172
1344	0.511952	0.545187	0.594113
1345	0.511838	0.54505	0.594022
1346	0.511716	0.544908	0.593922
1347	0.511573	0.544723	0.593781
1348	0.511422	0.544521	0.593625
1349	0.51124	0.544302	0.593458
1350	0.511041	0.544075	0.593286
1351	0.510846	0.543858	0.593089
1352	0.510654	0.543647	0.592873
1353	0.510442	0.54343	0.592647
1354	0.510212	0.543204	0.592414
1355	0.510005	0.542998	0.592198
1356	0.509829	0.542818	0.592006
1357	0.509659	0.54265	0.59182
1358	0.5095	0.542498	0.591641
1359	0.509359	0.542367	0.59148
1360	0.509254	0.542284	0.591355
1361	0.509151	0.542201	0.591228
1362	0.509053	0.542116	0.591089
1363	0.508953	0.542029	0.590949
1364	0.508831	0.541925	0.590798
1365	0.508698	0.541808	0.590636
1366	0.508445	0.541556	0.590347
1367	0.508191	0.541303	0.59006
1368	0.507759	0.540901	0.589654
1369	0.507333	0.540504	0.589254
1370	0.506621	0.539813	0.588605
1371	0.505906	0.53912	0.587955
1372	0.504983	0.538247	0.58713
1373	0.504045	0.537362	0.586293
1374	0.502885	0.536256	0.585236
1375	0.50169	0.535116	0.584144
1376	0.500534	0.533969	0.583069
1377	0.499393	0.532825	0.582003
1378	0.498335	0.531741	0.580933
1379	0.497316	0.530686	0.579865
1380	0.496545	0.529822	0.578935
1381	0.49591	0.529065	0.578082
1382	0.495513	0.528468	0.577326
1383	0.495285	0.527987	0.576642
1384	0.495264	0.527638	0.576024
1385	0.495432	0.527409	0.575466
1386	0.495711	0.527214	0.574894
1387	0.49612	0.527056	0.574304
1388	0.496519	0.526851	0.573636
1389	0.496904	0.526574	0.572851
1390	0.497264	0.526227	0.57196
1391	0.497577	0.525745	0.570862
1392	0.497846	0.525201	0.569698
1393	0.498006	0.524497	0.568356
1394	0.49812	0.523725	0.566946
1395	0.498076	0.522707	0.565283
1396	0.498004	0.521669	0.563606
1397	0.497789	0.520502	0.561815
1398	0.497558	0.51932	0.560012
1399	0.497183	0.517971	0.558055
1400	0.496801	0.516623	0.556106
1401	0.49624	0.515193	0.554188
1402	0.495682	0.513767	0.552276
1403	0.494641	0.512007	0.550169
1404	0.493601	0.51025	0.548068
1405	0.491976	0.508149	0.545826
1406	0.490316	0.50603	0.543579
1407	0.488125	0.503582	0.541192
1408	0.485866	0.501093	0.538789
1409	0.483673	0.498874	0.536781
1410	0.481497	0.496712	0.534855
1411	0.479527	0.494927	0.533401
1412	0.477619	0.493252	0.532084
1413	0.476427	0.492388	0.531591
1414	0.475514	0.491838	0.531417
1415	0.475691	0.492406	0.5323
1416	0.476411	0.493531	0.533711
1417	0.477955	0.495487	0.535915
1418	0.480017	0.497967	0.53862
1419	0.482499	0.50093	0.541816
1420	0.48531	0.504271	0.545399
1421	0.488171	0.507684	0.549061
1422	0.491083	0.511167	0.552802
1423	0.493927	0.514614	0.556539
1424	0.496692	0.518022	0.560271
1425	0.499104	0.521102	0.563699
1426	0.501005	0.523709	0.566687
1427	0.50269	0.526125	0.569493
1428	0.503988	0.528198	0.571971
1429	0.505141	0.530094	0.574264
1430	0.505963	0.531585	0.576133
1431	0.506723	0.533	0.577912
1432	0.507305	0.534188	0.579421
1433	0.507844	0.535309	0.580851
1434	0.50822	0.536171	0.581975
1435	0.508578	0.537002	0.583066
1436	0.50884	0.537656	0.583967
1437	0.509093	0.538295	0.584843
1438	0.509277	0.538793	0.585506
1439	0.509459	0.539287	0.586163
1440	0.509621	0.53969	0.586693
1441	0.509783	0.540093	0.587222
1442	0.509897	0.540386	0.587602
1443	0.510011	0.540681	0.587984
1444	0.5101	0.54093	0.58828
1445	0.510189	0.541179	0.588576
1446	0.510273	0.541388	0.58882
1447	0.510357	0.541594	0.589061
1448	0.510443	0.541781	0.589266
1449	0.51053	0.541966	0.589467
1450	0.510606	0.54213	0.589646
1451	0.51068	0.542289	0.589822
1452	0.510751	0.542439	0.589968
1453	0.510821	0.542586	0.590106
1454	0.510913	0.542741	0.590255
1455	0.511011	0.542898	0.590407
1456	0.511091	0.543047	0.590532
1457	0.511163	0.543192	0.590646
1458	0.511239	0.543335	0.590778
1459	0.511315	0.543478	0.590919
1460	0.511381	0.543604	0.591029
1461	0.511441	0.543719	0.591122
1462	0.5115	0.543841	0.591226
1463	0.51156	0.543968	0.591338
1464	0.511629	0.544111	0.591456
1465	0.511704	0.544264	0.591577
1466	0.51178	0.54441	0.591692
1467	0.511856	0.54455	0.5918
1468	0.511921	0.544688	0.591906
1469	0.511975	0.544825	0.592008
1470	0.512033	0.544957	0.592117
1471	0.512098	0.545085	0.592235
1472	0.512176	0.545232	0.592364
1473	0.512273	0.545408	0.592508
1474	0.512355	0.545574	0.592646
1475	0.512414	0.545725	0.592774
1476	0.51248	0.54588	0.592914
1477	0.512558	0.546046	0.593078
1478	0.512627	0.546196	0.59323
1479	0.51268	0.546309	0.593351
1480	0.512733	0.546426	0.593466
1481	0.512789	0.546547	0.593567
1482	0.512843	0.546673	0.593674
1483	0.51289	0.546816	0.593802
1484	0.512938	0.546956	0.593929
1485	0.512985	0.547088	0.594054
1486	0.513037	0.547219	0.594182
1487	0.513104	0.547343	0.594317
1488	0.513168	0.547465	0.594451
1489	0.513207	0.547567	0.59457
1490	0.513248	0.547671	0.59469
1491	0.513328	0.547793	0.594808
1492	0.513408	0.547914	0.594928
1493	0.513464	0.54802	0.595051
1494	0.513521	0.548126	0.595174
1495	0.513571	0.548234	0.595288
1496	0.513621	0.548341	0.595402
1497	0.513689	0.548433	0.595512
1498	0.513758	0.548525	0.595623
1499	0.513837	0.548623	0.595734
1500	0.513918	0.548724	0.595846
1501	0.513971	0.54881	0.595972
1502	0.514022	0.548894	0.596099
1503	0.514067	0.54896	0.596214
1504	0.514112	0.549024	0.596326
1505	0.514168	0.549109	0.596442
1506	0.514226	0.549197	0.596558
1507	0.51429	0.549283	0.596693
1508	0.514358	0.549368	0.596833
1509	0.51441	0.549462	0.596974
1510	0.514458	0.54956	0.597114
1511	0.514514	0.549626	0.597237
1512	0.514571	0.549683	0.597355
1513	0.514641	0.549772	0.597484
1514	0.514717	0.549869	0.597618
1515	0.514778	0.54994	0.597748
1516	0.514836	0.550005	0.597877
1517	0.514888	0.550084	0.598005
1518	0.514936	0.55017	0.598133
1519	0.515011	0.55027	0.598266
1520	0.5151	0.550375	0.598403
1521	0.515179	0.550467	0.598541
1522	0.515252	0.550549	0.598679
1523	0.515327	0.550637	0.598817
1524	0.515404	0.550728	0.598954
1525	0.515469	0.550811	0.599087
1526	0.515527	0.550892	0.599217
1527	0.515578	0.550966	0.599352
1528	0.515624	0.551036	0.599492
1529	0.515692	0.551107	0.599636
1530	0.515774	0.551176	0.599782
1531	0.515834	0.551244	0.599914
1532	0.51588	0.551315	0.600034
1533	0.515924	0.551368	0.600159
1534	0.515963	0.551402	0.600286
1535	0.516003	0.551452	0.600407
1536	0.516047	0.55152	0.600524
1537	0.516091	0.551593	0.600652
1538	0.516135	0.551672	0.60079
1539	0.516172	0.551731	0.600908
1540	0.516202	0.551769	0.601003
1541	0.516228	0.551809	0.601107
1542	0.516248	0.551854	0.601225
1543	0.516267	0.551893	0.601328
1544	0.516281	0.551922	0.601407
1545	0.516292	0.551944	0.601476
1546	0.516295	0.551951	0.601528
1547	0.516308	0.551971	0.601593
1548	0.51634	0.552015	0.601683
1549	0.516363	0.552055	0.601767
1550	0.51637	0.552086	0.60184
1551	0.516375	0.552124	0.601917
1552	0.516378	0.552173	0.602004
1553	0.516381	0.552209	0.60208
1554	0.516385	0.552217	0.602144
1555	0.516395	0.552238	0.60222
1556	0.516413	0.552284	0.602308
1557	0.516431	0.552338	0.602387
1558	0.516454	0.552411	0.602453
1559	0.516471	0.552476	0.60252
1560	0.516466	0.552518	0.602585
1561	0.516466	0.552555	0.602644
1562	0.516481	0.552584	0.60269
1563	0.516506	0.552626	0.602754
1564	0.516551	0.552702	0.602861
1565	0.516585	0.552769	0.602951
1566	0.516593	0.552815	0.603002
1567	0.516613	0.552871	0.603064
1568	0.516663	0.552945	0.603149
1569	0.516706	0.553012	0.603229
1570	0.516719	0.553067	0.603291
1571	0.516735	0.553122	0.603356
1572	0.516767	0.553178	0.603422
1573	0.516797	0.553238	0.603483
1574	0.516818	0.553308	0.603527
1575	0.516842	0.553377	0.60357
1576	0.516869	0.553448	0.603608
1577	0.516892	0.553518	0.603649
1578	0.516913	0.553573	0.603699
1579	0.516936	0.553634	0.603747
1580	0.516963	0.553702	0.603777
1581	0.516985	0.553767	0.603808
1582	0.516997	0.553839	0.60385
1583	0.517011	0.55391	0.603891
1584	0.517027	0.553963	0.603923
1585	0.517045	0.554021	0.603964
1586	0.517072	0.55409	0.604047
1587	0.517096	0.554158	0.604121
1588	0.517094	0.554208	0.604123
1589	0.51709	0.554254	0.604124
1590	0.517097	0.554305	0.60414
1591	0.517114	0.554365	0.604157
1592	0.517167	0.554463	0.604177
1593	0.517215	0.554559	0.604201
1594	0.517232	0.554637	0.604231
1595	0.517249	0.554713	0.604258
1596	0.517261	0.554797	0.60428
1597	0.517275	0.554884	0.604304
1598	0.517295	0.554952	0.604317
1599	0.517311	0.555015	0.604329
1600	0.517333	0.55509	0.604351
1601	0.517357	0.555166	0.604377
1602	0.51739	0.555242	0.60441
1603	0.517424	0.555319	0.604442
1604	0.517437	0.555375	0.604443
1605	0.517446	0.555426	0.60444
1606	0.517454	0.555471	0.604412
1607	0.517465	0.55552	0.604389
1608	0.517465	0.555585	0.604417
1609	0.517462	0.555641	0.604433
1610	0.517451	0.555645	0.604367
1611	0.517443	0.555658	0.60431
1612	0.517465	0.555707	0.604311
1613	0.517487	0.555757	0.604314
1614	0.517521	0.555831	0.604326
1615	0.517552	0.555903	0.604336
1616	0.517549	0.555961	0.604327
1617	0.517551	0.556019	0.604321
1618	0.517585	0.55608	0.604336
1619	0.517612	0.556137	0.604345
1620	0.517614	0.556168	0.604338
1621	0.517618	0.5562	0.604334
1622	0.517599	0.55623	0.604324
1623	0.517585	0.556266	0.60432
1624	0.51762	0.556336	0.604333
1625	0.517654	0.556406	0.604341
1626	0.51768	0.556473	0.604355
1627	0.517702	0.556533	0.604375
1628	0.517712	0.556557	0.604402
1629	0.517729	0.556587	0.604429
1630	0.517766	0.556628	0.604444
1631	0.517799	0.556665	0.604456
1632	0.517811	0.556702	0.604447
1633	0.517823	0.55674	0.604439
1634	0.517858	0.556791	0.604454
1635	0.51789	0.556839	0.604468
1636	0.517893	0.556863	0.604464
1637	0.517901	0.556888	0.604464
1638	0.51793	0.556912	0.604499
1639	0.517955	0.556936	0.604525
1640	0.517962	0.556961	0.604507
1641	0.517969	0.556991	0.604497
1642	0.517992	0.557027	0.604526
1643	0.518021	0.557058	0.604564
1644	0.518059	0.55707	0.604621
1645	0.518093	0.557082	0.604669
1646	0.51812	0.557103	0.604694
1647	0.518141	0.557127	0.604716
1648	0.518151	0.557166	0.604736
1649	0.518165	0.5572	0.604763
1650	0.518179	0.557206	0.60479
1651	0.518195	0.557219	0.604823
1652	0.518226	0.557248	0.604872
1653	0.518264	0.55728	0.604921
1654	0.518316	0.55733	0.604978
1655	0.51836	0.557379	0.60503
1656	0.518381	0.557406	0.605064
1657	0.518405	0.557437	0.6051
1658	0.518434	0.557477	0.605141
1659	0.518457	0.557509	0.605179
1660	0.518469	0.557524	0.605219
1661	0.518479	0.557529	0.605256
1662	0.51849	0.557527	0.605291
1663	0.5185	0.557527	0.605326
1664	0.518507	0.557523	0.605353
1665	0.518521	0.557515	0.605389
1666	0.518544	0.557502	0.605447
1667	0.518565	0.557496	0.605492
1668	0.518586	0.557494	0.60551
1669	0.518619	0.557501	0.605549
1670	0.518672	0.557524	0.605632
1671	0.518707	0.557548	0.605714
1672	0.518718	0.557574	0.605792
1673	0.518736	0.557607	0.605867
1674	0.518762	0.55765	0.605937
1675	0.518781	0.557676	0.605985
1676	0.518788	0.557681	0.606001
1677	0.518805	0.557702	0.606042
1678	0.518838	0.55774	0.606116
1679	0.518868	0.557757	0.606194
1680	0.518887	0.55775	0.606274
1681	0.518888	0.557742	0.60633
1682	0.518866	0.557728	0.606359
1683	0.518868	0.557736	0.606409
1684	0.518896	0.557768	0.606479
1685	0.518918	0.55779	0.606553
1686	0.518936	0.557807	0.606637
1687	0.518956	0.557832	0.606717
1688	0.518971	0.557858	0.606786
1689	0.518981	0.557878	0.606844
1690	0.518992	0.557901	0.6069
1691	0.519003	0.557903	0.60693
1692	0.519014	0.557889	0.60694
1693	0.519024	0.557897	0.606998
1694	0.519029	0.557918	0.607083
1695	0.519064	0.557944	0.607151
1696	0.519119	0.557976	0.60721
1697	0.519103	0.55794	0.607218
1698	0.519049	0.557875	0.607208
1699	0.519036	0.557869	0.607232
1700	0.519043	0.557886	0.60727
1701	0.519043	0.557901	0.60733
1702	0.519039	0.557916	0.607397
1703	0.519036	0.557916	0.60745
1704	0.519035	0.557909	0.6075
1705	0.51905	0.557952	0.607557
1706	0.519072	0.558011	0.607616
1707	0.51909	0.558045	0.607689
1708	0.519104	0.558074	0.607768
1709	0.519106	0.558076	0.607792
1710	0.519106	0.558069	0.607802
1711	0.519103	0.55805	0.607803
1712	0.519099	0.558031	0.607802
1713	0.519105	0.55804	0.607814
1714	0.519112	0.558055	0.607833
1715	0.519111	0.558051	0.607836
1716	0.519107	0.558041	0.607834
1717	0.51909	0.557973	0.607823
1718	0.519073	0.557901	0.607812
1719	0.519009	0.557856	0.607756
1720	0.518942	0.557811	0.607697
1721	0.518915	0.55779	0.607718
1722	0.518888	0.55777	0.607741
1723	0.518851	0.557771	0.607731
1724	0.518813	0.557773	0.607718
1725	0.518808	0.557757	0.607698
1726	0.518804	0.557741	0.607678
1727	0.518773	0.557682	0.607653
1728	0.518736	0.557627	0.607625
1729	0.518662	0.557628	0.60757
1730	0.518595	0.557621	0.607516
1731	0.51856	0.557553	0.607467
1732	0.518517	0.557483	0.607419
1733	0.518436	0.557408	0.607373
1734	0.518355	0.557335	0.607319
1735	0.518288	0.557282	0.607234
1736	0.518217	0.557234	0.607147
1737	0.518133	0.557202	0.607051
1738	0.518063	0.557174	0.606965
1739	0.518032	0.557157	0.606912
1740	0.517989	0.557142	0.606849
1741	0.517915	0.557128	0.606761
1742	0.517852	0.557108	0.606679
1743	0.517811	0.557082	0.60661
1744	0.517764	0.557054	0.606519
1745	0.517711	0.557025	0.606395
1746	0.517645	0.556989	0.606275
1747	0.517563	0.556945	0.606162
1748	0.517497	0.556896	0.606048
1749	0.517451	0.556843	0.605934
1750	0.517419	0.556825	0.605842
1751	0.5174	0.556844	0.60577
1752	0.517381	0.556861	0.605717
1753	0.517362	0.556876	0.60568
1754	0.517346	0.556864	0.605635
1755	0.517333	0.55683	0.605584
1756	0.517321	0.556805	0.605547
1757	0.517309	0.556786	0.605519
1758	0.517274	0.556782	0.605417
1759	0.517228	0.556787	0.605276
1760	0.517214	0.556784	0.605224
1761	0.517213	0.556778	0.605211
1762	0.517166	0.556764	0.605133
1763	0.517102	0.556745	0.60503
1764	0.517075	0.556778	0.604988
1765	0.517057	0.556828	0.604963
1766	0.517032	0.556836	0.604891
1767	0.517007	0.556834	0.60481
1768	0.516954	0.556836	0.60471
1769	0.516894	0.556838	0.604605
1770	0.516872	0.556806	0.604527
1771	0.516855	0.556772	0.60445
1772	0.516824	0.556792	0.604377
1773	0.516794	0.556814	0.604306
1774	0.516722	0.556821	0.604215
1775	0.516648	0.556824	0.604123
1776	0.516629	0.556808	0.604019
1777	0.516609	0.556801	0.603918
1778	0.51657	0.556838	0.603852
1779	0.516533	0.556866	0.603776
1780	0.516524	0.556839	0.603664
1781	0.51652	0.556825	0.603568
1782	0.516615	0.55688	0.6038
1783	0.516595	0.556844	0.603799
1784	0.516546	0.556825	0.603754
1785	0.516497	0.556807	0.603717
1786	0.516505	0.556813	0.603709
1787	0.516528	0.556829	0.603707
1788	0.516539	0.55681	0.603702
1789	0.51651	0.556756	0.603701
1790	0.516478	0.556719	0.603707
1791	0.516484	0.55672	0.603684
1792	0.51649	0.556719	0.603658
1793	0.516473	0.556708	0.603617
1794	0.516455	0.556697	0.603577
1795	0.516498	0.556716	0.60361
1796	0.516549	0.556738	0.60366
1797	0.516579	0.556775	0.603702
1798	0.516608	0.556828	0.603746
1799	0.516641	0.556883	0.603807
1800	0.516676	0.556936	0.60387
1801	0.516733	0.556987	0.603945
1802	0.516839	0.557045	0.604079
1803	0.516946	0.557115	0.604232
1804	0.517077	0.557252	0.6045
1805	0.517214	0.557395	0.604782
1806	0.51734	0.557489	0.605043
1807	0.51746	0.557579	0.605301
1808	0.517545	0.55768	0.605484
1809	0.51761	0.557762	0.605632
1810	0.51769	0.557832	0.605797
1811	0.517794	0.557911	0.605998
1812	0.517899	0.557983	0.606187
1813	0.517979	0.558035	0.606315
1814	0.518053	0.558088	0.606435
1815	0.518125	0.558161	0.606526
1816	0.518206	0.558235	0.606611
1817	0.518312	0.558318	0.606717
1818	0.518421	0.558413	0.606844
1819	0.518516	0.558505	0.606963
1820	0.518617	0.55858	0.607049
1821	0.518728	0.558666	0.607133
1822	0.518813	0.558771	0.607191
1823	0.518891	0.558864	0.60724
1824	0.518967	0.558929	0.607294
1825	0.51904	0.55899	0.607348
1826	0.519081	0.559019	0.607377
1827	0.519123	0.559045	0.607402
1828	0.519223	0.55912	0.607464
1829	0.519332	0.55921	0.60753
1830	0.519418	0.559298	0.607591
1831	0.519476	0.559361	0.607655
1832	0.519538	0.559411	0.607712
1833	0.51965	0.55948	0.607769
1834	0.519756	0.559551	0.607823
1835	0.519816	0.559605	0.607846
1836	0.519873	0.559655	0.607871
1837	0.519967	0.559706	0.607965
1838	0.520066	0.559758	0.60806
1839	0.52016	0.559808	0.608121
1840	0.520243	0.55986	0.608183
1841	0.520341	0.559914	0.608251
1842	0.520463	0.559965	0.608322
1843	0.520566	0.560024	0.60841
1844	0.520646	0.560117	0.608531
1845	0.520732	0.560208	0.608649
1846	0.520833	0.560269	0.60877
1847	0.520932	0.560323	0.608888
1848	0.521026	0.560361	0.608972
1849	0.521125	0.560406	0.609057
1850	0.521209	0.560453	0.609147
1851	0.521281	0.56049	0.609222
1852	0.521366	0.560519	0.609299
1853	0.521474	0.560577	0.609406
1854	0.521564	0.56062	0.609495
1855	0.521602	0.560596	0.609522
1856	0.521636	0.560566	0.609538
1857	0.521641	0.560479	0.609496
1858	0.521642	0.560389	0.609446
1859	0.521617	0.560302	0.609351
1860	0.52159	0.560218	0.609254
1861	0.52159	0.560126	0.609136
1862	0.521599	0.56003	0.609009
1863	0.521596	0.559908	0.608866
1864	0.521572	0.559771	0.608702
1865	0.521554	0.559636	0.608519
1866	0.521545	0.559492	0.608283
1867	0.521511	0.559332	0.608034
1868	0.521421	0.559102	0.607724
1869	0.521332	0.558867	0.607409
1870	0.52121	0.558587	0.607041
1871	0.521077	0.558303	0.606664
1872	0.520939	0.557991	0.606267
1873	0.520806	0.557671	0.605877
1874	0.520646	0.557326	0.605457
1875	0.520467	0.556954	0.60501
1876	0.520285	0.556553	0.604551
1877	0.52007	0.55611	0.604058
1878	0.519834	0.555643	0.603537
1879	0.519553	0.555082	0.602914
1880	0.519273	0.554527	0.602291
1881	0.519008	0.553986	0.601621
1882	0.518745	0.553445	0.600947
1883	0.518426	0.552837	0.600166
1884	0.51809	0.552213	0.599368
1885	0.517744	0.55153	0.598535
1886	0.517389	0.550809	0.597677
1887	0.517007	0.550062	0.596767
1888	0.516582	0.549275	0.595775
1889	0.51616	0.548483	0.594779
1890	0.515758	0.547675	0.593759
1891	0.515345	0.546858	0.592726
1892	0.514848	0.545963	0.591601
1893	0.514345	0.545062	0.590469
1894	0.513826	0.544157	0.589307
1895	0.513302	0.54325	0.588138
1896	0.512778	0.542347	0.586963
1897	0.512246	0.541425	0.58576
1898	0.511738	0.540535	0.584634
1899	0.511253	0.53967	0.583557
1900	0.510764	0.538831	0.582514
1901	0.510264	0.538045	0.58154
1902	0.50977	0.537281	0.580595
1903	0.509273	0.536592	0.579753
1904	0.508778	0.535909	0.57892
1905	0.508322	0.535319	0.578225
1906	0.507871	0.534738	0.577543
1907	0.507492	0.534282	0.577003
1908	0.507128	0.533863	0.576507
1909	0.506757	0.533473	0.576104
1910	0.506381	0.533098	0.575758
1911	0.506022	0.532771	0.57544
1912	0.505691	0.532525	0.575177
1913	0.505384	0.532301	0.574958
1914	0.505139	0.532141	0.574882
1915	0.504896	0.531983	0.574805
1916	0.504678	0.531868	0.574748
1917	0.504463	0.531755	0.574694
1918	0.504276	0.531691	0.574701
1919	0.504091	0.531627	0.574711
1920	0.503948	0.531611	0.574751
1921	0.503819	0.531622	0.574808
1922	0.503689	0.53161	0.574861
1923	0.503572	0.531583	0.574913
1924	0.503468	0.53156	0.57497
1925	0.50338	0.53154	0.575041
1926	0.503298	0.53153	0.575114
1927	0.503245	0.531557	0.575194
1928	0.503197	0.531583	0.575272
1929	0.503145	0.531609	0.575346
1930	0.503093	0.531636	0.57542
1931	0.503051	0.531704	0.575562
1932	0.503022	0.531773	0.575714
1933	0.503013	0.531829	0.575826
1934	0.502999	0.531876	0.575911
1935	0.502983	0.53193	0.576002
1936	0.502983	0.531995	0.576105
1937	0.502994	0.532068	0.576217
1938	0.50302	0.532147	0.57634
1939	0.503054	0.532239	0.576471
1940	0.5031	0.532375	0.576626
1941	0.503143	0.532507	0.57678
1942	0.503208	0.532655	0.576983
1943	0.503275	0.532805	0.57719
1944	0.503375	0.532975	0.577401
1945	0.503482	0.533149	0.577616
1946	0.503589	0.533321	0.577816
1947	0.503689	0.533485	0.578003
1948	0.50378	0.533651	0.578209
1949	0.503867	0.533817	0.578427
1950	0.503981	0.533999	0.578664
1951	0.50413	0.534209	0.578937
1952	0.504273	0.534425	0.579207
1953	0.504404	0.534654	0.579468
1954	0.504539	0.534885	0.579731
1955	0.504744	0.535163	0.580024
1956	0.50495	0.535441	0.580317
1957	0.505119	0.535688	0.580592
1958	0.505282	0.535935	0.580869
1959	0.505459	0.536215	0.581177
1960	0.505644	0.536506	0.581493
1961	0.505847	0.536794	0.581817
1962	0.506066	0.537083	0.582153
1963	0.506265	0.537357	0.582471
1964	0.506433	0.537602	0.582762
1965	0.506603	0.537853	0.583053
1966	0.506784	0.538123	0.583344
1967	0.506971	0.538396	0.583639
1968	0.507211	0.538695	0.583997
1969	0.507451	0.538994	0.584354
1970	0.507659	0.539265	0.584656
1971	0.507867	0.539532	0.584953
1972	0.508095	0.539827	0.585295
1973	0.50833	0.540131	0.585646
1974	0.508593	0.540465	0.586024
1975	0.508873	0.540819	0.586418
1976	0.509142	0.541171	0.586805
1977	0.5094	0.541513	0.587182
1978	0.509662	0.541861	0.587576
1979	0.509939	0.542237	0.58801
1980	0.510215	0.542612	0.58844
1981	0.510473	0.542959	0.588835
1982	0.510731	0.543306	0.58923
1983	0.511012	0.543653	0.58963
1984	0.511296	0.544001	0.590033
1985	0.511557	0.544341	0.590417
1986	0.511812	0.544678	0.590797
1987	0.512067	0.545025	0.591198
1988	0.512326	0.54538	0.591612
1989	0.512612	0.545763	0.592024
1990	0.512917	0.546166	0.592428
1991	0.513224	0.546554	0.59285
1992	0.513538	0.546921	0.5933
1993	0.513847	0.547291	0.593747
1994	0.514137	0.547662	0.594183
1995	0.514431	0.548036	0.59462
1996	0.514746	0.548427	0.595055
1997	0.51506	0.54882	0.595491
1998	0.515389	0.549219	0.595964
1999	0.515717	0.549619	0.59644
2000	0.516035	0.550017	0.596888
2001	0.516353	0.550414	0.597332
2002	0.516648	0.550804	0.597754
2003	0.516931	0.551188	0.598162
2004	0.517239	0.551575	0.598596
2005	0.517573	0.551967	0.599056
2006	0.517896	0.552356	0.599509
2007	0.518196	0.552742	0.599947
2008	0.518505	0.553129	0.600384
2009	0.51884	0.553517	0.600809
2010	0.519177	0.553909	0.601238
2011	0.519509	0.554336	0.601701
2012	0.519841	0.554764	0.602165
2013	0.520092	0.555115	0.602584
2014	0.520339	0.555462	0.603001
2015	0.52063	0.555827	0.603421
2016	0.520934	0.556198	0.603842
2017	0.521214	0.556556	0.604245
2018	0.521481	0.556908	0.604639
2019	0.521762	0.557249	0.605038
2020	0.522056	0.557581	0.605442
2021	0.52236	0.557908	0.605846
2022	0.522682	0.558226	0.60625
2023	0.522993	0.558549	0.60665
2024	0.523263	0.558885	0.607036
2025	0.523535	0.55922	0.607421
2026	0.523817	0.559547	0.60779
2027	0.5241	0.559876	0.60816
2028	0.52439	0.560207	0.608497
2029	0.524681	0.56054	0.608834
2030	0.524928	0.560818	0.609163
2031	0.525166	0.561086	0.609491
2032	0.525411	0.561372	0.609828
2033	0.525658	0.561666	0.610169
2034	0.525888	0.561919	0.610487
2035	0.526106	0.562139	0.610788
2036	0.526327	0.562369	0.611102
2037	0.526552	0.562614	0.611434
2038	0.526776	0.562864	0.611766
2039	0.526999	0.563127	0.61209
2040	0.527213	0.563381	0.612404
2041	0.527381	0.563579	0.61266
2042	0.527551	0.563778	0.612916
2043	0.527731	0.563975	0.613181
2044	0.527911	0.564172	0.613446
2045	0.528078	0.564358	0.613707
2046	0.528244	0.564542	0.613966
2047	0.528402	0.564716	0.61421
2048	0.528556	0.564885	0.614451
2049	0.528687	0.565003	0.614624
2050	0.528806	0.565091	0.614761
2051	0.528924	0.565207	0.614925
2052	0.529046	0.56535	0.615115
2053	0.529167	0.56548	0.615314
2054	0.529283	0.565586	0.615521
2055	0.529383	0.565687	0.615713
2056	0.529443	0.56577	0.615868
2057	0.529505	0.565855	0.616017
2058	0.52957	0.565938	0.616115
2059	0.529637	0.566021	0.616213
2060	0.529735	0.566079	0.616337
2061	0.529834	0.566137	0.616463
2062	0.529893	0.566191	0.616573
2063	0.529946	0.566246	0.616681
2064	0.530039	0.56634	0.616819
2065	0.530146	0.566447	0.616967
2066	0.530249	0.566518	0.617091
2067	0.530351	0.566566	0.617198
2068	0.530432	0.566616	0.617309
2069	0.530492	0.566674	0.617425
2070	0.530544	0.56671	0.617516
2071	0.530587	0.566715	0.617571
2072	0.530634	0.566721	0.617628
2073	0.530685	0.566721	0.617682
2074	0.53073	0.566719	0.617732
2075	0.530732	0.566702	0.617759
2076	0.530732	0.566684	0.617784
2077	0.530747	0.566646	0.617794
2078	0.530763	0.566607	0.617804
2079	0.530757	0.566543	0.617775
2080	0.530746	0.566472	0.617739
2081	0.530739	0.566419	0.617698
2082	0.530736	0.566376	0.617657
2083	0.530741	0.56629	0.617577
2084	0.530747	0.566185	0.617478
2085	0.530758	0.566094	0.617406
2086	0.530771	0.566012	0.617352
2087	0.530783	0.565927	0.617298
2088	0.530798	0.565839	0.617251
2089	0.530815	0.565755	0.617188
2090	0.530834	0.565684	0.617101
2091	0.530854	0.565615	0.617025
2092	0.530868	0.565545	0.616986
2093	0.530882	0.565475	0.616945
2094	0.530906	0.565387	0.616868
2095	0.530932	0.565299	0.616792
2096	0.530991	0.565242	0.616761
2097	0.53105	0.565185	0.616732
2098	0.531068	0.565066	0.616644
2099	0.531076	0.564936	0.616548
2100	0.531017	0.564786	0.616429
2101	0.530941	0.564632	0.616305
2102	0.530894	0.564488	0.616181
2103	0.530856	0.564344	0.616055
2104	0.530786	0.564156	0.615909
2105	0.530695	0.563942	0.615757
2106	0.530575	0.56373	0.615596
2107	0.530429	0.563525	0.615425
2108	0.5303	0.563318	0.615258
2109	0.530208	0.563127	0.615114
2110	0.530122	0.562958	0.614986
2111	0.530084	0.562863	0.614937
2112	0.530055	0.562774	0.614893
2113	0.530093	0.562723	0.614864
2114	0.530138	0.562675	0.614838
2115	0.530257	0.562666	0.614882
2116	0.530378	0.562656	0.614929
2117	0.530542	0.562732	0.615037
2118	0.530707	0.562816	0.615149
2119	0.530893	0.562919	0.615301
2120	0.531074	0.56301	0.615452
2121	0.531138	0.563064	0.615501
2122	0.531149	0.563105	0.615503
2123	0.531137	0.563083	0.615504
2124	0.531101	0.563007	0.6155
2125	0.531014	0.562884	0.615461
2126	0.530877	0.562714	0.615379
2127	0.53069	0.562508	0.615251
2128	0.530437	0.562246	0.615059
2129	0.530138	0.561929	0.614828
2130	0.529738	0.561501	0.614511
2131	0.529303	0.56104	0.61415
2132	0.528738	0.56046	0.613622
2133	0.528159	0.559867	0.613086
2134	0.527522	0.559236	0.612533
2135	0.526874	0.558596	0.611971
2136	0.526089	0.557793	0.611248
2137	0.525297	0.556978	0.610515
2138	0.524456	0.556108	0.609737
2139	0.523604	0.555228	0.60895
2140	0.522654	0.554224	0.607987
2141	0.521689	0.553197	0.606988
2142	0.520718	0.552135	0.605969
2143	0.519747	0.551056	0.604943
2144	0.518644	0.549876	0.603791
2145	0.517462	0.548639	0.602566
2146	0.516311	0.547392	0.601283
2147	0.515171	0.546131	0.599941
2148	0.513977	0.544808	0.598557
2149	0.512723	0.543397	0.597129
2150	0.511437	0.541944	0.595644
2151	0.510094	0.540418	0.594048
2152	0.508705	0.538826	0.592395
2153	0.507174	0.537042	0.590583
2154	0.505614	0.535229	0.588732
2155	0.50395	0.533321	0.58672
2156	0.502261	0.531386	0.58468
2157	0.500402	0.529277	0.582465
2158	0.498524	0.527148	0.580229
2159	0.496555	0.524887	0.577876
2160	0.494578	0.522614	0.575512
2161	0.49246	0.520209	0.57293
2162	0.490324	0.517787	0.570321
2163	0.488261	0.515385	0.567736
2164	0.486221	0.512995	0.565159
2165	0.484185	0.510594	0.562518
2166	0.482158	0.508189	0.559856
2167	0.480259	0.505887	0.557257
2168	0.47844	0.50365	0.554694
2169	0.476677	0.501393	0.552074
2170	0.474953	0.499122	0.549415
2171	0.473345	0.496935	0.546824
2172	0.471866	0.494826	0.544308
2173	0.470458	0.492746	0.541809
2174	0.469159	0.490726	0.539337
2175	0.467946	0.488801	0.536913
2176	0.46693	0.487074	0.534604
2177	0.46598	0.48535	0.532289
2178	0.465276	0.483686	0.530005
2179	0.464631	0.482076	0.52776
2180	0.464282	0.480734	0.525733
2181	0.463973	0.479415	0.523703
2182	0.463974	0.478302	0.52176
2183	0.463996	0.477197	0.519827
2184	0.464215	0.476277	0.518154
2185	0.464447	0.475366	0.516488
2186	0.464857	0.474602	0.51489
2187	0.465262	0.473831	0.513282
2188	0.465606	0.473088	0.511787
2189	0.465913	0.472329	0.510292
2190	0.466061	0.471517	0.508785
2191	0.466132	0.470662	0.507254
2192	0.465885	0.46964	0.505711
2193	0.465473	0.468524	0.504139
2194	0.464697	0.46719	0.502451
2195	0.463655	0.465697	0.500668
2196	0.462189	0.463985	0.498767
2197	0.460401	0.462102	0.496783
2198	0.458274	0.460037	0.494716
2199	0.455844	0.457821	0.492595
2200	0.453257	0.455532	0.490487
2201	0.450613	0.453292	0.488495
2202	0.447926	0.451077	0.486557
2203	0.445415	0.449093	0.484908
2204	0.443085	0.447317	0.483472
2205	0.441522	0.44632	0.48275
2206	0.440177	0.445524	0.482214
2207	0.439937	0.445707	0.482583
2208	0.43991	0.446084	0.48313
2209	0.441113	0.447547	0.484678
2210	0.442485	0.449163	0.486362
2211	0.445049	0.451861	0.489023
2212	0.447719	0.45465	0.491769
2213	0.451002	0.457955	0.495009
2214	0.454309	0.461285	0.498276
2215	0.45795	0.464965	0.501897
2216	0.461582	0.468641	0.50552
2217	0.4649	0.47211	0.508984
2218	0.468133	0.475518	0.512395
2219	0.471122	0.4788	0.51572
2220	0.474047	0.482057	0.519027
2221	0.476475	0.484863	0.521945
2222	0.478759	0.487526	0.524747
2223	0.480743	0.489929	0.527345
2224	0.482621	0.492237	0.529869
2225	0.484235	0.494331	0.532158
2226	0.485706	0.49631	0.534314
2227	0.487028	0.498157	0.536385
2228	0.488245	0.499905	0.53839
2229	0.48933	0.501497	0.540225
2230	0.490287	0.502948	0.541894
2231	0.491135	0.504299	0.543457
2232	0.491855	0.505532	0.544904
2233	0.492502	0.506666	0.546253
2234	0.493046	0.507645	0.547444
2235	0.493526	0.508571	0.548602
2236	0.49389	0.509397	0.549703
2237	0.494223	0.510179	0.550724
2238	0.494483	0.510854	0.551542
2239	0.494719	0.511501	0.552335
2240	0.494844	0.512025	0.553027
2241	0.494947	0.512524	0.553697
2242	0.494971	0.51291	0.554253
2243	0.494995	0.513292	0.554814
2244	0.494982	0.513615	0.555394
2245	0.494959	0.513936	0.555967
2246	0.494912	0.514236	0.556432
2247	0.494863	0.514534	0.556898
2248	0.494789	0.514788	0.557365
2249	0.494714	0.515044	0.557837
2250	0.494679	0.515286	0.558222
2251	0.494648	0.515529	0.558603
2252	0.494578	0.515738	0.559017
2253	0.494506	0.515951	0.559444
2254	0.494474	0.516214	0.559852
2255	0.494445	0.516483	0.560252
2256	0.494468	0.516751	0.560681
2257	0.494508	0.517023	0.561125
2258	0.494602	0.517329	0.561546
2259	0.494713	0.517649	0.561964
2260	0.494866	0.517985	0.562407
2261	0.495041	0.518333	0.562863
2262	0.495248	0.518685	0.563275
2263	0.49546	0.519027	0.563655
2264	0.495658	0.519371	0.564056
2265	0.49585	0.519717	0.564473
2266	0.496032	0.520029	0.564805
2267	0.496201	0.520314	0.565071
2268	0.496357	0.520549	0.565336
2269	0.496507	0.52075	0.565608
2270	0.496617	0.520893	0.565823
2271	0.496681	0.520966	0.565973
2272	0.496704	0.521036	0.566087
2273	0.49667	0.521101	0.566162
2274	0.496637	0.521118	0.566194
2275	0.496601	0.521063	0.566149
2276	0.496527	0.520996	0.566063
2277	0.496393	0.520913	0.565907
2278	0.496237	0.520799	0.565732
2279	0.496026	0.520613	0.565512
2280	0.495794	0.520387	0.565275
2281	0.495508	0.520052	0.565003
2282	0.495198	0.519706	0.564723
2283	0.494848	0.519357	0.564442
2284	0.494484	0.518979	0.564109
2285	0.494059	0.518501	0.563569
2286	0.493636	0.518022	0.563027
2287	0.493237	0.517562	0.562513
2288	0.492818	0.517089	0.561994
2289	0.492331	0.516573	0.561505
2290	0.491845	0.516052	0.561013
2291	0.491407	0.515564	0.560541
2292	0.49096	0.515066	0.560051
2293	0.490463	0.514475	0.559398
2294	0.489959	0.513877	0.558739
2295	0.48957	0.513367	0.558187
2296	0.489176	0.51285	0.557625
2297	0.488836	0.512328	0.557023
2298	0.488491	0.511799	0.556412
2299	0.48822	0.511393	0.555909
2300	0.487948	0.510985	0.555401
2301	0.487826	0.510603	0.55489
2302	0.487712	0.510216	0.554374
2303	0.487606	0.509882	0.553881
2304	0.487498	0.509549	0.553382
2305	0.487379	0.509194	0.5529
2306	0.487257	0.508832	0.552416
2307	0.487272	0.508551	0.551931
2308	0.487312	0.508282	0.551442
2309	0.487361	0.507984	0.550941
2310	0.487413	0.507676	0.550434
2311	0.487475	0.507478	0.55005
2312	0.487541	0.507305	0.549695
2313	0.487651	0.507083	0.549257
2314	0.487775	0.506846	0.548792
2315	0.487822	0.506581	0.548358
2316	0.487842	0.506305	0.547931
2317	0.487909	0.506061	0.547466
2318	0.487995	0.50583	0.546984
2319	0.488071	0.505631	0.546569
2320	0.488144	0.505445	0.546178
2321	0.488223	0.505185	0.545763
2322	0.488307	0.504891	0.545333
2323	0.488411	0.50467	0.544967
2324	0.488522	0.504485	0.544632
2325	0.4886	0.504305	0.544281
2326	0.488663	0.504122	0.543913
2327	0.488767	0.503891	0.543521
2328	0.488888	0.503631	0.543118
2329	0.488979	0.503401	0.542715
2330	0.489055	0.503187	0.542304
2331	0.489085	0.502954	0.541936
2332	0.489089	0.50271	0.5416
2333	0.489146	0.50248	0.541281
2334	0.489247	0.502262	0.54098
2335	0.489275	0.501977	0.540637
2336	0.489244	0.501641	0.540264
2337	0.489092	0.501251	0.53979
2338	0.488835	0.500806	0.539217
2339	0.488616	0.500368	0.538695
2340	0.488429	0.499936	0.538214
2341	0.488123	0.499436	0.537625
2342	0.487693	0.49887	0.536938
2343	0.487208	0.498311	0.536354
2344	0.486681	0.497755	0.535869
2345	0.486176	0.497195	0.535401
2346	0.485671	0.496625	0.534931
2347	0.48513	0.496046	0.534434
[truncated: 153 more rows]

## Sheet: Table S7
Table S7. VNIR-SWIR reflectance spectra corresponding to mechanic mixtures of illite-kaolinite reference minerals from the Athabasca Basin Mineral Standards database
Wavelength	I-K 20:80	I-K 20:80	I-K 60:40
350	0.184408	0.160087	0.177421
351	0.191428	0.16162	0.18608
352	0.193563	0.156294	0.187367
353	0.217442	0.177377	0.199773
354	0.228933	0.185633	0.211147
355	0.237381	0.191145	0.223914
356	0.2544	0.206833	0.242408
357	0.271046	0.221704	0.260435
358	0.285427	0.233496	0.271783
359	0.296182	0.240521	0.272308
360	0.30336	0.243077	0.27753
361	0.311447	0.248968	0.287127
362	0.320248	0.257926	0.299844
363	0.322851	0.259953	0.30094
364	0.327931	0.263889	0.305187
365	0.336889	0.270227	0.31284
366	0.35623	0.282184	0.327468
367	0.360336	0.284562	0.328993
368	0.360927	0.285265	0.328362
369	0.363459	0.288185	0.331028
370	0.372276	0.296583	0.338523
371	0.378422	0.301715	0.344787
372	0.381132	0.302806	0.34916
373	0.386452	0.304636	0.351032
374	0.389053	0.306148	0.35268
375	0.389459	0.306588	0.353672
376	0.387411	0.302709	0.352123
377	0.388579	0.304164	0.352196
378	0.391569	0.307496	0.35442
379	0.396228	0.311026	0.360207
380	0.397568	0.313448	0.36045
381	0.398229	0.315206	0.361406
382	0.398687	0.316382	0.364191
383	0.404156	0.321032	0.364856
384	0.405874	0.322308	0.366537
385	0.405541	0.32187	0.369146
386	0.408778	0.325426	0.373121
387	0.411939	0.328708	0.376218
388	0.413809	0.331277	0.377878
389	0.412566	0.332459	0.37688
390	0.414564	0.333557	0.378113
391	0.417345	0.335205	0.38078
392	0.420411	0.337664	0.384886
393	0.41938	0.336352	0.383176
394	0.420437	0.337431	0.384078
395	0.423053	0.340293	0.387048
396	0.424116	0.341618	0.388969
397	0.424405	0.342001	0.389069
398	0.424701	0.342258	0.388852
399	0.426135	0.343488	0.390247
400	0.427983	0.344533	0.392374
401	0.429049	0.345417	0.393963
402	0.42874	0.346138	0.394453
403	0.430538	0.348407	0.396047
404	0.431322	0.34944	0.3968
405	0.431076	0.349305	0.396743
406	0.431554	0.350361	0.397315
407	0.432134	0.35131	0.398296
408	0.432772	0.352175	0.399435
409	0.433458	0.352983	0.400392
410	0.434051	0.353877	0.40058
411	0.434775	0.355095	0.400968
412	0.435814	0.356907	0.402165
413	0.435836	0.356759	0.402347
414	0.435834	0.356682	0.402663
415	0.435966	0.356965	0.403272
416	0.437447	0.359097	0.404798
417	0.438068	0.360212	0.405568
418	0.438182	0.360768	0.405924
419	0.438428	0.361699	0.406568
420	0.439104	0.362718	0.40713
421	0.439704	0.363218	0.407511
422	0.439816	0.362514	0.407567
423	0.440414	0.363744	0.408371
424	0.441079	0.365304	0.409635
425	0.441735	0.366904	0.411334
426	0.442674	0.367453	0.411751
427	0.443463	0.368232	0.412393
428	0.44415	0.36917	0.413229
429	0.444899	0.370027	0.414242
430	0.445337	0.3708	0.415214
431	0.445721	0.371629	0.41614
432	0.446315	0.372728	0.417007
433	0.447759	0.374363	0.41896
434	0.448907	0.375756	0.420517
435	0.449393	0.376654	0.421203
436	0.450052	0.377311	0.422015
437	0.450633	0.378122	0.422789
438	0.451137	0.379065	0.42351
439	0.45163	0.379948	0.424093
440	0.451784	0.380443	0.424095
441	0.451962	0.380819	0.424
442	0.452777	0.381447	0.424541
443	0.453405	0.382108	0.424914
444	0.454083	0.382924	0.425537
445	0.454932	0.383997	0.426664
446	0.455633	0.385002	0.427582
447	0.456263	0.385811	0.428391
448	0.456838	0.386432	0.429094
449	0.457441	0.386999	0.429578
450	0.458517	0.388108	0.430522
451	0.459652	0.389335	0.431613
452	0.460004	0.389852	0.43228
453	0.460609	0.390903	0.433306
454	0.461437	0.392084	0.434399
455	0.462556	0.39321	0.435419
456	0.462972	0.393426	0.435833
457	0.463504	0.393993	0.436469
458	0.464256	0.395063	0.437431
459	0.465085	0.395973	0.438463
460	0.465624	0.396642	0.439164
461	0.465997	0.397162	0.439621
462	0.466483	0.397718	0.439926
463	0.467425	0.398508	0.440797
464	0.468325	0.39931	0.441731
465	0.468773	0.39996	0.442363
466	0.469564	0.400853	0.443111
467	0.470244	0.401679	0.443721
468	0.470716	0.402375	0.444135
469	0.471414	0.402935	0.444864
470	0.472077	0.403549	0.445687
471	0.472695	0.40419	0.446534
472	0.473215	0.40476	0.447101
473	0.473589	0.405195	0.447547
474	0.474005	0.4057	0.447976
475	0.47471	0.406561	0.448506
476	0.47544	0.407165	0.449211
477	0.476101	0.407722	0.449835
478	0.476662	0.408289	0.4503
479	0.477392	0.409225	0.451261
480	0.47806	0.409914	0.452056
481	0.478654	0.41042	0.452706
482	0.479127	0.411248	0.45346
483	0.479965	0.412269	0.454382
484	0.480908	0.413237	0.455301
485	0.481637	0.413757	0.455968
486	0.482215	0.414461	0.456867
487	0.482853	0.415254	0.457787
488	0.483665	0.416132	0.458663
489	0.48444	0.416843	0.459346
490	0.485155	0.417561	0.460022
491	0.48582	0.418303	0.460708
492	0.486565	0.419138	0.461473
493	0.487056	0.419727	0.462038
494	0.487468	0.420213	0.46249
495	0.488128	0.420846	0.462942
496	0.488835	0.421702	0.46373
497	0.489566	0.422559	0.464507
498	0.490325	0.423297	0.465078
499	0.490842	0.423932	0.465755
500	0.491463	0.424633	0.46645
501	0.492228	0.425422	0.467155
502	0.493007	0.426232	0.467953
503	0.493709	0.427001	0.468652
504	0.494357	0.427739	0.469302
505	0.495003	0.428475	0.470047
506	0.495644	0.429187	0.47073
507	0.496262	0.429874	0.471407
508	0.496848	0.430538	0.472128
509	0.497513	0.431424	0.472856
510	0.498173	0.432235	0.473569
511	0.498811	0.432911	0.474263
512	0.499393	0.433655	0.474906
513	0.500152	0.434477	0.475685
514	0.501003	0.435353	0.476537
515	0.501619	0.436204	0.477218
516	0.502254	0.436965	0.477963
517	0.502942	0.437729	0.478758
518	0.503763	0.438614	0.479631
519	0.504381	0.439339	0.480339
520	0.504941	0.440065	0.481012
521	0.505478	0.440846	0.481687
522	0.506175	0.441558	0.482325
523	0.506718	0.442196	0.482892
524	0.507142	0.442786	0.483416
525	0.50772	0.443474	0.484086
526	0.508286	0.444228	0.484741
527	0.508846	0.44497	0.485385
528	0.509413	0.445583	0.486031
529	0.510106	0.446357	0.486756
530	0.51081	0.447172	0.487495
531	0.511488	0.448	0.48823
532	0.512122	0.448796	0.488977
533	0.512779	0.449556	0.489736
534	0.513463	0.450289	0.490505
535	0.51418	0.451094	0.491296
536	0.514883	0.45189	0.492115
537	0.515606	0.452718	0.492994
538	0.516452	0.453715	0.494061
539	0.517354	0.454741	0.495289
540	0.518288	0.455818	0.496606
541	0.519262	0.456987	0.498009
542	0.520302	0.458217	0.499523
543	0.521235	0.459327	0.50084
544	0.522027	0.460279	0.5019
545	0.522469	0.46081	0.502307
546	0.522806	0.461265	0.502535
547	0.523088	0.461661	0.502614
548	0.523435	0.462012	0.502526
549	0.523741	0.462362	0.502618
550	0.524116	0.462808	0.502903
551	0.524685	0.463475	0.503485
552	0.525176	0.464088	0.50406
553	0.525685	0.464717	0.504617
554	0.526235	0.46538	0.505152
555	0.526718	0.466034	0.505685
556	0.527227	0.466691	0.506238
557	0.527751	0.467347	0.506813
558	0.528253	0.46799	0.507433
559	0.528823	0.468713	0.508122
560	0.529407	0.469472	0.508824
561	0.529956	0.470247	0.509487
562	0.530553	0.471066	0.51022
563	0.53113	0.471839	0.510927
564	0.531668	0.472532	0.511574
565	0.532134	0.473173	0.512165
566	0.532508	0.473757	0.512706
567	0.532786	0.474284	0.513185
568	0.532904	0.474737	0.513476
569	0.532943	0.475132	0.513719
570	0.532974	0.475495	0.513943
571	0.5331	0.475849	0.514184
572	0.533317	0.47633	0.514539
573	0.533635	0.476896	0.515021
574	0.534085	0.477555	0.515671
575	0.534725	0.47835	0.516423
576	0.535379	0.479199	0.517259
577	0.53603	0.480085	0.518159
578	0.536652	0.480886	0.518873
579	0.537224	0.481642	0.5196
580	0.537733	0.482359	0.520306
581	0.538111	0.48303	0.5209
582	0.5383	0.483492	0.521312
583	0.538473	0.483907	0.521683
584	0.538725	0.484353	0.522082
585	0.539125	0.484899	0.5226
586	0.539662	0.48556	0.523215
587	0.540332	0.486341	0.523929
588	0.541044	0.487232	0.52481
589	0.541794	0.488122	0.525682
590	0.542538	0.488993	0.52652
591	0.543136	0.489779	0.527225
592	0.543845	0.490666	0.528068
593	0.544582	0.491561	0.52892
594	0.545287	0.492391	0.529677
595	0.54594	0.493224	0.5304
596	0.546604	0.494073	0.531158
597	0.547291	0.494941	0.531968
598	0.547897	0.495754	0.532679
599	0.548458	0.49646	0.533306
600	0.54898	0.497085	0.53388
601	0.549478	0.497713	0.534514
602	0.54998	0.498373	0.535174
603	0.550511	0.499104	0.535889
604	0.55112	0.499992	0.536729
605	0.551673	0.500781	0.537465
606	0.552248	0.50154	0.538258
607	0.552872	0.502284	0.539169
608	0.553421	0.503053	0.54005
609	0.554021	0.503853	0.540987
610	0.554657	0.504659	0.541943
611	0.555196	0.505278	0.542591
612	0.555322	0.505494	0.542704
613	0.555247	0.505451	0.542495
614	0.555185	0.505207	0.542106
615	0.55532	0.505245	0.542099
616	0.555538	0.505413	0.542213
617	0.555813	0.505681	0.542372
618	0.556121	0.505921	0.542609
619	0.556452	0.506195	0.542913
620	0.5568	0.506504	0.543278
621	0.55711	0.506803	0.543652
622	0.557408	0.50697	0.543962
623	0.557699	0.507076	0.54423
624	0.557986	0.507242	0.54448
625	0.558215	0.50734	0.544666
626	0.558439	0.507461	0.544845
627	0.558689	0.507667	0.545048
628	0.558922	0.507922	0.54533
629	0.559171	0.508222	0.545655
630	0.559444	0.50857	0.546019
631	0.559831	0.509094	0.546429
632	0.560171	0.509575	0.546711
633	0.560476	0.510032	0.546911
634	0.56076	0.510522	0.547128
635	0.561114	0.510998	0.547468
636	0.561454	0.511414	0.547786
637	0.56171	0.51171	0.54796
638	0.56203	0.512127	0.548316
639	0.562362	0.512563	0.548703
640	0.562699	0.513002	0.549095
641	0.563014	0.513465	0.549521
642	0.563349	0.514003	0.550016
643	0.563698	0.51459	0.550559
644	0.564059	0.515163	0.551102
645	0.564414	0.515717	0.551612
646	0.564764	0.516262	0.552112
647	0.565113	0.516815	0.552631
648	0.565456	0.517398	0.5532
649	0.565808	0.517972	0.553753
650	0.566179	0.518526	0.554273
651	0.56654	0.519041	0.554734
652	0.566936	0.519587	0.555209
653	0.567354	0.520149	0.555689
654	0.567703	0.520617	0.556114
655	0.568104	0.521149	0.5566
656	0.568511	0.521685	0.557083
657	0.568856	0.522131	0.557464
658	0.569241	0.522587	0.557913
659	0.569629	0.523055	0.558383
660	0.570009	0.523544	0.558863
661	0.57041	0.524033	0.559279
662	0.570821	0.524533	0.559717
663	0.57124	0.525041	0.560184
664	0.571686	0.525488	0.560693
665	0.572116	0.525992	0.561207
666	0.572542	0.52653	0.561727
667	0.572989	0.527077	0.562264
668	0.573426	0.527583	0.562738
669	0.573893	0.528089	0.563223
670	0.574432	0.52862	0.563773
671	0.574886	0.529125	0.564257
672	0.575353	0.529657	0.564766
673	0.575846	0.530224	0.565314
674	0.576349	0.530753	0.565879
675	0.576825	0.531262	0.566368
676	0.577289	0.531771	0.566832
677	0.577785	0.532363	0.567422
678	0.578275	0.532937	0.56796
679	0.57875	0.533489	0.568458
680	0.579199	0.534014	0.568912
681	0.57971	0.534561	0.569466
682	0.580179	0.535103	0.570004
683	0.58058	0.535636	0.570504
684	0.580988	0.536079	0.570933
685	0.581441	0.536592	0.571441
686	0.581922	0.537142	0.571992
687	0.582369	0.537612	0.57246
688	0.582825	0.538167	0.572958
689	0.583272	0.53874	0.573469
690	0.583691	0.53927	0.573986
691	0.58421	0.539832	0.57453
692	0.584718	0.540388	0.575063
693	0.585183	0.540927	0.575573
694	0.585627	0.541408	0.576074
695	0.586065	0.541905	0.576562
696	0.58651	0.542421	0.577042
697	0.587046	0.542962	0.577559
698	0.587548	0.543475	0.578085
699	0.588017	0.543973	0.578602
700	0.588442	0.544463	0.579083
701	0.588886	0.545009	0.579623
702	0.58935	0.545535	0.580135
703	0.589838	0.546004	0.580577
704	0.590362	0.546623	0.58119
705	0.590837	0.547196	0.581713
706	0.591262	0.547713	0.582141
707	0.591729	0.548225	0.582602
708	0.592119	0.548705	0.583055
709	0.59248	0.549155	0.583492
710	0.592894	0.549558	0.583881
711	0.59328	0.55001	0.584314
712	0.593634	0.550465	0.584744
713	0.593944	0.550898	0.585145
714	0.594263	0.551292	0.585529
715	0.594622	0.55171	0.585926
716	0.595024	0.552158	0.58634
717	0.595408	0.552587	0.586729
718	0.595733	0.552992	0.587088
719	0.596045	0.553396	0.587448
720	0.596481	0.553867	0.587909
721	0.596888	0.554321	0.58833
722	0.597269	0.554761	0.588737
723	0.597614	0.555183	0.589146
724	0.59793	0.555621	0.589561
725	0.598255	0.556023	0.58995
726	0.598599	0.556378	0.590306
727	0.598995	0.556804	0.590729
728	0.599375	0.557244	0.591145
729	0.599726	0.557681	0.591545
730	0.599987	0.558042	0.591872
731	0.600261	0.558375	0.592136
732	0.60051	0.558683	0.592359
733	0.60068	0.558956	0.592547
734	0.600794	0.559205	0.592723
735	0.600945	0.55945	0.592917
736	0.601168	0.559694	0.593145
737	0.601376	0.55998	0.593355
738	0.601661	0.56034	0.593654
739	0.602012	0.56076	0.594034
740	0.602343	0.561155	0.594457
741	0.602671	0.561535	0.594823
742	0.603033	0.561933	0.595187
743	0.603501	0.562412	0.595633
744	0.60392	0.562832	0.596065
745	0.604312	0.563233	0.596459
746	0.604679	0.563626	0.596794
747	0.605027	0.563991	0.597172
748	0.605418	0.564422	0.59759
749	0.605855	0.564918	0.59805
750	0.606318	0.565374	0.598546
751	0.606767	0.565798	0.599048
752	0.607238	0.566227	0.599555
753	0.607831	0.56674	0.600068
754	0.60829	0.567224	0.600541
755	0.608736	0.567722	0.601014
756	0.609235	0.568262	0.601509
757	0.609631	0.568666	0.601932
758	0.610095	0.569119	0.602405
759	0.610642	0.569642	0.602941
760	0.611061	0.570095	0.603416
761	0.611507	0.570555	0.6039
762	0.611966	0.571015	0.604376
763	0.6124	0.571452	0.604791
764	0.612797	0.571858	0.605172
765	0.613208	0.572251	0.605552
766	0.613684	0.572635	0.605955
767	0.61412	0.573119	0.606398
768	0.614532	0.573554	0.606811
769	0.614922	0.573908	0.607178
770	0.615265	0.574254	0.607515
771	0.615607	0.574589	0.607836
772	0.615955	0.574922	0.608153
773	0.616347	0.575284	0.608513
774	0.616705	0.575661	0.608881
775	0.617043	0.576039	0.609239
776	0.617369	0.576402	0.609563
777	0.617571	0.576674	0.609815
778	0.617822	0.576946	0.610105
779	0.618183	0.577244	0.610472
780	0.618479	0.577469	0.610707
781	0.618783	0.577786	0.610989
782	0.619087	0.578172	0.611305
783	0.619313	0.578433	0.611526
784	0.619591	0.578675	0.611784
785	0.619868	0.57891	0.612047
786	0.620065	0.579151	0.612265
787	0.620398	0.579488	0.612578
788	0.620663	0.579773	0.61285
789	0.62075	0.579927	0.61301
790	0.621002	0.580151	0.613237
791	0.621294	0.580428	0.613511
792	0.621612	0.580748	0.613825
793	0.621881	0.580977	0.614096
794	0.622114	0.581222	0.614331
795	0.622338	0.581487	0.614554
796	0.622609	0.581797	0.614813
797	0.622893	0.58206	0.615072
798	0.623215	0.582351	0.615355
799	0.623603	0.582724	0.615685
800	0.623964	0.583064	0.616027
801	0.624264	0.583379	0.61635
802	0.624499	0.583668	0.616643
803	0.624755	0.583894	0.616801
804	0.62492	0.584005	0.616882
805	0.625031	0.584071	0.616934
806	0.625183	0.584294	0.617099
807	0.625471	0.584598	0.617393
808	0.62587	0.584982	0.61777
809	0.62642	0.58549	0.618231
810	0.626941	0.585979	0.618788
811	0.62746	0.586451	0.619305
812	0.627982	0.586905	0.619751
813	0.628442	0.587324	0.620207
814	0.628884	0.587689	0.620634
815	0.629308	0.588028	0.621047
816	0.629695	0.588465	0.621499
817	0.630082	0.588815	0.621868
818	0.630458	0.58911	0.622191
819	0.630808	0.589358	0.622485
820	0.631158	0.589682	0.62286
821	0.6315	0.590045	0.623227
822	0.631828	0.590444	0.623558
823	0.632141	0.590756	0.623882
824	0.632473	0.591031	0.624185
825	0.632823	0.591284	0.624473
826	0.633177	0.591615	0.624786
827	0.633512	0.591982	0.625112
828	0.633829	0.592356	0.62544
829	0.634109	0.592691	0.625747
830	0.634452	0.59298	0.626089
831	0.634815	0.593273	0.626421
832	0.635185	0.593589	0.626723
833	0.635527	0.593872	0.62702
834	0.63589	0.59419	0.627333
835	0.636273	0.594548	0.627665
836	0.636589	0.594938	0.628012
837	0.636935	0.595247	0.628317
838	0.637295	0.595516	0.628617
839	0.637645	0.595801	0.628985
840	0.637925	0.596128	0.629331
841	0.638204	0.596467	0.629666
842	0.638523	0.596801	0.629988
843	0.638856	0.597116	0.630317
844	0.63914	0.597374	0.630596
845	0.639367	0.597569	0.630813
846	0.639615	0.597801	0.631003
847	0.639868	0.598034	0.631228
848	0.640127	0.59828	0.631474
849	0.640403	0.598584	0.631704
850	0.640676	0.598835	0.631939
851	0.640956	0.599087	0.632182
852	0.641253	0.599378	0.632432
853	0.641504	0.599618	0.632699
854	0.641745	0.599843	0.632963
855	0.64198	0.600058	0.633218
856	0.642095	0.600235	0.633401
857	0.642305	0.600438	0.633604
858	0.642574	0.600668	0.633834
859	0.642761	0.60093	0.634137
860	0.64297	0.601143	0.63433
861	0.643204	0.601363	0.634515
862	0.643478	0.601655	0.634805
863	0.643721	0.601928	0.635043
864	0.643938	0.602174	0.635278
865	0.644126	0.602385	0.635522
866	0.64434	0.602593	0.635759
867	0.644644	0.60289	0.636068
868	0.645007	0.603241	0.636418
869	0.645214	0.603396	0.636589
870	0.645419	0.603662	0.63685
871	0.645662	0.603989	0.637175
872	0.646031	0.604334	0.637563
873	0.646316	0.604585	0.637884
874	0.646596	0.604843	0.638154
875	0.646902	0.605151	0.638364
876	0.64713	0.605422	0.638608
877	0.647445	0.605756	0.638904
878	0.647837	0.606145	0.639245
879	0.648043	0.606407	0.639534
880	0.648308	0.606702	0.639817
881	0.648617	0.607016	0.640099
882	0.648963	0.607323	0.640389
883	0.64926	0.607638	0.640671
884	0.649589	0.607982	0.640993
885	0.650006	0.608379	0.641401
886	0.650283	0.608676	0.641701
887	0.650593	0.609033	0.642041
888	0.650959	0.609464	0.642435
889	0.651333	0.609722	0.642719
890	0.651585	0.60995	0.642963
891	0.651783	0.610181	0.643189
892	0.6521	0.610512	0.643455
893	0.652459	0.61087	0.643813
894	0.652782	0.61119	0.644143
895	0.65299	0.611398	0.644334
896	0.653252	0.611654	0.644624
897	0.653505	0.611891	0.644864
898	0.653734	0.612093	0.645023
899	0.653965	0.612371	0.645338
900	0.65418	0.612622	0.645602
901	0.654382	0.612865	0.645833
902	0.654574	0.613179	0.646099
903	0.654785	0.613427	0.646344
904	0.655014	0.613675	0.646606
905	0.655268	0.613997	0.646938
906	0.655425	0.614191	0.647123
907	0.655522	0.614383	0.647304
908	0.655558	0.614606	0.647521
909	0.655861	0.614954	0.647827
910	0.656171	0.615295	0.648099
911	0.656467	0.615621	0.648341
912	0.65665	0.6159	0.648603
913	0.656938	0.616233	0.648944
914	0.657236	0.616577	0.649286
915	0.657392	0.616867	0.649495
916	0.657622	0.617052	0.64969
917	0.657909	0.617272	0.649941
918	0.658263	0.617593	0.650295
919	0.65849	0.617937	0.65052
920	0.658768	0.61827	0.650811
921	0.659103	0.618594	0.651171
922	0.659399	0.618973	0.651458
923	0.6597	0.619316	0.651794
924	0.659995	0.61964	0.652154
925	0.660257	0.619967	0.652499
926	0.660552	0.620282	0.65284
927	0.66086	0.620587	0.653146
928	0.661172	0.620876	0.653384
929	0.661478	0.621193	0.653658
930	0.661798	0.621517	0.653956
931	0.662131	0.621844	0.654276
932	0.662367	0.622198	0.65456
933	0.662632	0.622494	0.654832
934	0.662914	0.622763	0.655101
935	0.66318	0.623082	0.655392
936	0.663399	0.623383	0.655643
937	0.663597	0.623693	0.655921
938	0.663785	0.624035	0.656292
939	0.663965	0.624356	0.656526
940	0.664075	0.624587	0.656674
941	0.664097	0.624703	0.656741
942	0.664307	0.624921	0.657063
943	0.664401	0.625135	0.657236
944	0.66443	0.625351	0.657323
945	0.664621	0.625598	0.657595
946	0.664696	0.62579	0.657773
947	0.664737	0.625964	0.657902
948	0.664817	0.62615	0.657997
949	0.664823	0.626344	0.65816
950	0.664814	0.626506	0.658324
951	0.664801	0.626615	0.658471
952	0.664776	0.62671	0.658458
953	0.664739	0.626812	0.658507
954	0.664714	0.626929	0.658625
955	0.664895	0.627133	0.65882
956	0.665102	0.627243	0.658959
957	0.665318	0.627327	0.659092
958	0.66551	0.627476	0.659302
959	0.665904	0.627652	0.659553
960	0.666243	0.627791	0.659757
961	0.666401	0.627853	0.659861
962	0.666614	0.62803	0.660083
963	0.666728	0.628237	0.66027
964	0.666701	0.628444	0.660391
965	0.666172	0.628379	0.660195
966	0.66585	0.628437	0.660128
967	0.665681	0.628627	0.660189
968	0.66564	0.629043	0.66045
969	0.665794	0.629399	0.660746
970	0.666179	0.629818	0.661139
971	0.666905	0.630395	0.661701
972	0.668204	0.631038	0.662457
973	0.669749	0.631749	0.663394
974	0.671493	0.63253	0.66451
975	0.672734	0.633319	0.66537
976	0.67371	0.633968	0.666116
977	0.674471	0.634512	0.666739
978	0.675027	0.634988	0.667118
979	0.675443	0.635387	0.667506
980	0.6759	0.635826	0.667939
981	0.676564	0.636414	0.668464
982	0.674731	0.634893	0.667172
983	0.675115	0.63518	0.66742
984	0.675492	0.635441	0.667589
985	0.67587	0.635684	0.667715
986	0.676196	0.63593	0.66787
987	0.676472	0.636143	0.668048
988	0.676758	0.636328	0.668183
989	0.677046	0.636522	0.668284
990	0.677317	0.636642	0.668393
991	0.677565	0.63675	0.668488
992	0.677844	0.636933	0.668573
993	0.678129	0.637143	0.668627
994	0.67836	0.637287	0.668665
995	0.678566	0.637362	0.668745
996	0.678795	0.637455	0.668851
997	0.67903	0.637572	0.668921
998	0.679204	0.637653	0.668954
999	0.6793	0.637703	0.669004
1000	0.679422	0.63779	0.669083
1001	0.679578	0.637889	0.669169
1002	0.679733	0.63799	0.669239
1003	0.679992	0.638234	0.669367
1004	0.680258	0.638547	0.669597
1005	0.680466	0.638734	0.669798
1006	0.680592	0.638812	0.669913
1007	0.680666	0.638886	0.670022
1008	0.680725	0.638996	0.670157
1009	0.680819	0.639156	0.670328
1010	0.680996	0.639361	0.670561
1011	0.681192	0.639564	0.670822
1012	0.681303	0.639724	0.671027
1013	0.681384	0.639899	0.671201
1014	0.681539	0.640165	0.67145
1015	0.681709	0.640538	0.671821
1016	0.681824	0.640873	0.672189
1017	0.681921	0.641088	0.672469
1018	0.682047	0.641283	0.672743
1019	0.682168	0.64151	0.673038
1020	0.682325	0.641816	0.673404
1021	0.682542	0.642158	0.673816
1022	0.682741	0.64248	0.674187
1023	0.682865	0.642775	0.674502
1024	0.682948	0.643052	0.674818
1025	0.683068	0.643329	0.67518
1026	0.683267	0.643654	0.67559
1027	0.683494	0.644033	0.675983
1028	0.68364	0.644379	0.676276
1029	0.68372	0.644658	0.676533
1030	0.683853	0.644885	0.676811
1031	0.68403	0.645106	0.677126
1032	0.684266	0.645398	0.677491
1033	0.68449	0.645698	0.677799
1034	0.684666	0.645977	0.67806
1035	0.684839	0.646277	0.6783
1036	0.685028	0.646575	0.678539
1037	0.685249	0.64685	0.678792
1038	0.685487	0.647103	0.679027
1039	0.685717	0.647302	0.679204
1040	0.685917	0.647467	0.679366
1041	0.686095	0.647601	0.679503
1042	0.686295	0.647725	0.679599
1043	0.686546	0.647872	0.679706
1044	0.686787	0.648022	0.679837
1045	0.686961	0.648119	0.679923
1046	0.687169	0.648228	0.679996
1047	0.687424	0.648352	0.68006
1048	0.687657	0.648434	0.680078
1049	0.687854	0.648465	0.680088
1050	0.688001	0.648475	0.680087
1051	0.688149	0.648519	0.680068
1052	0.688314	0.648587	0.680036
1053	0.68848	0.648628	0.680018
1054	0.688634	0.648606	0.679986
1055	0.688774	0.648566	0.679919
1056	0.688856	0.648511	0.679792
1057	0.688909	0.648434	0.67964
1058	0.688982	0.648368	0.679518
1059	0.68907	0.648347	0.679445
1060	0.689199	0.648339	0.679425
1061	0.689353	0.648324	0.679441
1062	0.689428	0.648289	0.679407
1063	0.689384	0.64821	0.679287
1064	0.689385	0.648154	0.679193
1065	0.689473	0.648169	0.679151
1066	0.689539	0.648184	0.679106
1067	0.689572	0.648152	0.679092
1068	0.689614	0.64811	0.679108
1069	0.689617	0.648088	0.679132
1070	0.689585	0.64807	0.679134
1071	0.689575	0.648087	0.679169
1072	0.68959	0.648129	0.679242
1073	0.689644	0.648203	0.679377
1074	0.689718	0.648312	0.679563
1075	0.689754	0.648413	0.679711
1076	0.689753	0.64846	0.679796
1077	0.689765	0.648516	0.679921
1078	0.68973	0.648651	0.68009
1079	0.689677	0.648781	0.680241
1080	0.689696	0.648915	0.680443
1081	0.689742	0.649058	0.680676
1082	0.689768	0.649196	0.680913
1083	0.689775	0.649336	0.681132
1084	0.689785	0.649561	0.681387
1085	0.689804	0.649801	0.681662
1086	0.689846	0.650017	0.681962
1087	0.689884	0.650239	0.682261
1088	0.689922	0.650476	0.682565
1089	0.689968	0.650716	0.682879
1090	0.689984	0.650951	0.683167
1091	0.690002	0.651171	0.683435
1092	0.690066	0.651395	0.683724
1093	0.690187	0.651661	0.684028
1094	0.690283	0.651912	0.684308
1095	0.69033	0.652114	0.684591
1096	0.690392	0.652325	0.684886
1097	0.690462	0.65252	0.685147
1098	0.690518	0.652694	0.685376
1099	0.690558	0.652853	0.685522
1100	0.690604	0.653025	0.685666
1101	0.690697	0.653227	0.685898
1102	0.690803	0.653425	0.686128
1103	0.690905	0.653564	0.686277
1104	0.691003	0.653681	0.686411
1105	0.691071	0.653785	0.686511
1106	0.691121	0.653866	0.68656
1107	0.691182	0.653935	0.686584
1108	0.691271	0.653982	0.686584
1109	0.691372	0.654021	0.686584
1110	0.691487	0.654061	0.686564
1111	0.691601	0.654101	0.686541
1112	0.691724	0.654135	0.686519
1113	0.691848	0.654164	0.686495
1114	0.691966	0.654164	0.686406
1115	0.692081	0.65416	0.686305
1116	0.692222	0.654121	0.686198
1117	0.692371	0.654068	0.686092
1118	0.692505	0.654015	0.685988
1119	0.692629	0.653967	0.685881
1120	0.692711	0.65389	0.685738
1121	0.69277	0.653796	0.685579
1122	0.692839	0.653708	0.685419
1123	0.692926	0.653621	0.685253
1124	0.693025	0.653543	0.685095
1125	0.693157	0.653501	0.684961
1126	0.693289	0.653462	0.684827
1127	0.693415	0.653392	0.684683
1128	0.693535	0.653325	0.684545
1129	0.693594	0.653287	0.684414
1130	0.693646	0.653251	0.684284
1131	0.693687	0.653146	0.684146
1132	0.693725	0.653026	0.684007
1133	0.693745	0.652928	0.68389
1134	0.693768	0.652843	0.683783
1135	0.693821	0.652777	0.683695
1136	0.693898	0.652732	0.683622
1137	0.693958	0.652727	0.683575
1138	0.69398	0.652734	0.683538
1139	0.693999	0.652734	0.683503
1140	0.694029	0.652734	0.683483
1141	0.694045	0.652732	0.683468
1142	0.694043	0.652714	0.683449
1143	0.694047	0.652696	0.683441
1144	0.694061	0.652716	0.683481
1145	0.694076	0.65274	0.683524
1146	0.6941	0.652765	0.683608
1147	0.694125	0.652793	0.683693
1148	0.694174	0.652913	0.683841
1149	0.694223	0.65304	0.683993
1150	0.694248	0.653148	0.684131
1151	0.694266	0.653255	0.684263
1152	0.694318	0.653379	0.684417
1153	0.694385	0.653503	0.684576
1154	0.694447	0.653613	0.684693
1155	0.694503	0.653713	0.68478
1156	0.694534	0.653821	0.684905
1157	0.694543	0.653938	0.685082
1158	0.694569	0.654048	0.685247
1159	0.694617	0.654155	0.68538
1160	0.694667	0.654267	0.685508
1161	0.694707	0.654386	0.685643
1162	0.69475	0.654507	0.685783
1163	0.694861	0.654698	0.685986
1164	0.694968	0.654882	0.686185
1165	0.695027	0.654987	0.686331
1166	0.695083	0.655085	0.686471
1167	0.695186	0.655226	0.686623
1168	0.695295	0.655374	0.686777
1169	0.695351	0.655457	0.686879
1170	0.695392	0.655518	0.686964
1171	0.69545	0.655599	0.687045
1172	0.695508	0.655684	0.687119
1173	0.695573	0.655784	0.687209
1174	0.69565	0.655902	0.687321
1175	0.695727	0.656009	0.687425
1176	0.695809	0.656101	0.687519
1177	0.69589	0.65619	0.687612
1178	0.69597	0.656267	0.687693
1179	0.696046	0.656334	0.68776
1180	0.696113	0.656377	0.687773
1181	0.696182	0.656424	0.687788
1182	0.696273	0.656509	0.687853
1183	0.696363	0.656593	0.687918
1184	0.696439	0.656653	0.687952
1185	0.696514	0.656712	0.687982
1186	0.696554	0.656768	0.687993
1187	0.696584	0.656821	0.688002
1188	0.696589	0.656823	0.687948
1189	0.69658	0.656806	0.68787
1190	0.696601	0.656816	0.687832
1191	0.696645	0.656846	0.687823
1192	0.696705	0.656873	0.687833
1193	0.696783	0.656898	0.687866
1194	0.696845	0.656895	0.687879
1195	0.696881	0.656844	0.687856
1196	0.696908	0.656802	0.68783
1197	0.696908	0.656789	0.687795
1198	0.696914	0.656777	0.687758
1199	0.696947	0.656757	0.687697
1200	0.696977	0.656736	0.687637
1201	0.696975	0.656727	0.687586
1202	0.696973	0.656719	0.687536
1203	0.697004	0.656723	0.68751
1204	0.697037	0.656729	0.687487
1205	0.697005	0.65668	0.687415
1206	0.69696	0.656619	0.687331
1207	0.696928	0.656561	0.687267
1208	0.6969	0.656505	0.687212
1209	0.696885	0.656469	0.68716
1210	0.696877	0.656448	0.68711
1211	0.696831	0.656391	0.687039
1212	0.696745	0.656297	0.686947
1213	0.696662	0.656216	0.686852
1214	0.696581	0.656156	0.686753
1215	0.69649	0.65609	0.686654
1216	0.696376	0.65601	0.686554
1217	0.696261	0.655932	0.686454
1218	0.696132	0.655855	0.686359
1219	0.696001	0.655779	0.686263
1220	0.69583	0.655703	0.686156
1221	0.695659	0.655628	0.686049
1222	0.695442	0.655538	0.68593
1223	0.695223	0.655448	0.685811
1224	0.694954	0.655361	0.685687
1225	0.694678	0.655276	0.685562
1226	0.694381	0.655182	0.685404
1227	0.694079	0.655086	0.685234
1228	0.693761	0.65501	0.685082
1229	0.693438	0.654945	0.684941
1230	0.693104	0.654857	0.684789
1231	0.692762	0.654751	0.68463
1232	0.692427	0.654654	0.684485
1233	0.692102	0.654568	0.684359
1234	0.691808	0.654483	0.684239
1235	0.691569	0.654399	0.684129
1236	0.691344	0.65432	0.684029
1237	0.691158	0.654262	0.683958
1238	0.690985	0.654205	0.683893
1239	0.69088	0.654161	0.683861
1240	0.690784	0.654121	0.683833
1241	0.690816	0.654149	0.683876
1242	0.690848	0.654177	0.683918
1243	0.690968	0.654225	0.684025
1244	0.691091	0.654274	0.684134
1245	0.691278	0.654339	0.684257
1246	0.691475	0.654406	0.684381
1247	0.691681	0.654502	0.684531
1248	0.691888	0.654607	0.684689
1249	0.69211	0.654716	0.684855
1250	0.692339	0.654827	0.685025
1251	0.692548	0.654933	0.685195
1252	0.69274	0.655036	0.685366
1253	0.692945	0.655146	0.685546
1254	0.693164	0.655264	0.685737
1255	0.693364	0.655382	0.685909
1256	0.693533	0.655501	0.68605
1257	0.693707	0.655621	0.686195
1258	0.693893	0.655743	0.686351
1259	0.694079	0.655862	0.686507
1260	0.694265	0.655973	0.686665
1261	0.694447	0.656082	0.686821
1262	0.694599	0.656188	0.686957
1263	0.694751	0.656292	0.687091
1264	0.694891	0.656426	0.687215
1265	0.695031	0.65656	0.687339
1266	0.695122	0.656664	0.687453
1267	0.695208	0.656765	0.687566
1268	0.695279	0.656866	0.687687
1269	0.695347	0.656967	0.68781
1270	0.695403	0.65705	0.687891
1271	0.695454	0.657127	0.687957
1272	0.695455	0.657201	0.688005
1273	0.695425	0.657274	0.688042
1274	0.695407	0.657347	0.688076
1275	0.695398	0.657421	0.688108
1276	0.695337	0.657462	0.688111
1277	0.695211	0.657462	0.688078
1278	0.695076	0.657462	0.688031
1279	0.694924	0.657462	0.68796
1280	0.694744	0.657448	0.687876
1281	0.69449	0.657397	0.687753
1282	0.694215	0.65734	0.687619
1283	0.693848	0.657253	0.687434
1284	0.693473	0.657161	0.687243
1285	0.693048	0.657036	0.687011
1286	0.69262	0.65691	0.686778
1287	0.692115	0.656759	0.68648
1288	0.691606	0.656607	0.68618
1289	0.691078	0.656426	0.685867
1290	0.690546	0.656241	0.685551
1291	0.690013	0.656035	0.685229
1292	0.689477	0.655824	0.684905
1293	0.688961	0.655621	0.684579
1294	0.688449	0.655419	0.684251
1295	0.687951	0.655205	0.683929
1296	0.687458	0.654986	0.683609
1297	0.686952	0.654761	0.683281
1298	0.686435	0.65453	0.682945
1299	0.685902	0.654308	0.682604
1300	0.685354	0.654094	0.682258
1301	0.68481	0.653881	0.681908
1302	0.684276	0.653669	0.681552
1303	0.68374	0.653443	0.681191
1304	0.683204	0.653189	0.680824
1305	0.682673	0.652939	0.680456
1306	0.682162	0.652703	0.680086
1307	0.681668	0.652472	0.679727
1308	0.681265	0.652278	0.679428
1309	0.680865	0.652084	0.67913
1310	0.680506	0.651887	0.678843
1311	0.680148	0.65169	0.678556
1312	0.679876	0.651505	0.678284
1313	0.679603	0.651321	0.678013
1314	0.679348	0.651178	0.677825
1315	0.679094	0.65104	0.677643
1316	0.678817	0.650907	0.67743
1317	0.678537	0.650775	0.677212
1318	0.678227	0.650621	0.67698
1319	0.677908	0.650459	0.676744
1320	0.67753	0.650295	0.676497
1321	0.677126	0.650133	0.676245
1322	0.676747	0.649994	0.676015
1323	0.676382	0.649866	0.675797
1324	0.675983	0.649739	0.675556
1325	0.675557	0.649613	0.675297
1326	0.675154	0.649489	0.675069
1327	0.674778	0.649364	0.674877
1328	0.674426	0.649257	0.674707
1329	0.674112	0.649177	0.674574
1330	0.67381	0.649102	0.674443
1331	0.673534	0.649035	0.674317
1332	0.673268	0.648973	0.674202
1333	0.673032	0.64893	0.67412
1334	0.672803	0.64889	0.674045
1335	0.672617	0.648869	0.674008
1336	0.672434	0.648847	0.673973
1337	0.672283	0.648836	0.673962
1338	0.672133	0.648824	0.673952
1339	0.671909	0.6488	0.673895
1340	0.671686	0.648775	0.673839
1341	0.671315	0.648713	0.673692
1342	0.670935	0.648647	0.673538
1343	0.670349	0.648543	0.67328
1344	0.669733	0.648434	0.673006
1345	0.668754	0.648222	0.672509
1346	0.667684	0.647984	0.671955
1347	0.666326	0.647664	0.671259
1348	0.664863	0.647315	0.670513
1349	0.663139	0.646893	0.669617
1350	0.661279	0.646433	0.668644
1351	0.659349	0.645935	0.667613
1352	0.657373	0.64541	0.666543
1353	0.655428	0.644888	0.665485
1354	0.653518	0.644369	0.664438
1355	0.65182	0.64391	0.6635
1356	0.650392	0.643529	0.662699
1357	0.649135	0.643165	0.661974
1358	0.648163	0.642831	0.661373
1359	0.647359	0.642545	0.660867
1360	0.646935	0.642362	0.660573
1361	0.646597	0.642187	0.660308
1362	0.646534	0.64203	0.660131
1363	0.646505	0.641879	0.659968
1364	0.646643	0.64175	0.659871
1365	0.646771	0.641609	0.659763
1366	0.646817	0.641354	0.659545
1367	0.646854	0.6411	0.659325
1368	0.646563	0.640729	0.65892
1369	0.646276	0.640362	0.65852
1370	0.645467	0.639781	0.657771
1371	0.644647	0.6392	0.657018
1372	0.643303	0.638442	0.655952
1373	0.641912	0.637671	0.654862
1374	0.639866	0.636616	0.653362
1375	0.637706	0.635512	0.651791
1376	0.635151	0.634258	0.650004
1377	0.632491	0.632964	0.648161
1378	0.629329	0.631412	0.645964
1379	0.625974	0.629762	0.64363
1380	0.622297	0.627917	0.641071
1381	0.618453	0.625971	0.638396
1382	0.614134	0.623703	0.635327
1383	0.609488	0.621212	0.631985
1384	0.604601	0.618484	0.628386
1385	0.599505	0.615547	0.624561
1386	0.594036	0.612291	0.620395
1387	0.588138	0.608667	0.615838
1388	0.582282	0.604911	0.611221
1389	0.576464	0.600944	0.606497
1390	0.570779	0.59686	0.601783
1391	0.565307	0.592525	0.597054
1392	0.56021	0.588263	0.592535
1393	0.555994	0.584131	0.588487
1394	0.552075	0.580028	0.584595
1395	0.549115	0.575966	0.58118
1396	0.546434	0.572012	0.577952
1397	0.545086	0.568509	0.575577
1398	0.543876	0.565057	0.573295
1399	0.543752	0.561908	0.571684
1400	0.543669	0.558799	0.57011
1401	0.544317	0.556207	0.569103
1402	0.544964	0.553624	0.568099
1403	0.545682	0.551209	0.56721
1404	0.546398	0.548803	0.566324
1405	0.546258	0.546562	0.565113
1406	0.546063	0.544336	0.563883
1407	0.544738	0.542089	0.562088
1408	0.543267	0.539842	0.560221
1409	0.541725	0.53814	0.558588
1410	0.540169	0.536553	0.557005
1411	0.539098	0.535699	0.556014
1412	0.538169	0.53506	0.555197
1413	0.538447	0.535388	0.555385
1414	0.539193	0.536092	0.555964
1415	0.542378	0.538178	0.558345
1416	0.546781	0.540954	0.561626
1417	0.553385	0.54488	0.56651
1418	0.561375	0.549529	0.572404
1419	0.570649	0.554956	0.579251
1420	0.580931	0.560993	0.586846
1421	0.59119	0.567159	0.594487
1422	0.601433	0.573451	0.602178
1423	0.611563	0.579829	0.60987
1424	0.621561	0.586308	0.617564
1425	0.630613	0.592392	0.624627
1426	0.638292	0.5979	0.630771
1427	0.645259	0.60313	0.636452
1428	0.650943	0.607855	0.641293
1429	0.656099	0.612276	0.645761
1430	0.66005	0.615999	0.649374
1431	0.663802	0.619579	0.652826
1432	0.666965	0.622731	0.655793
1433	0.669962	0.625732	0.658614
1434	0.672312	0.628142	0.660859
1435	0.67459	0.630479	0.663035
1436	0.676468	0.632415	0.664835
1437	0.678295	0.634303	0.666588
1438	0.679702	0.635784	0.667946
1439	0.681094	0.637249	0.66929
1440	0.682214	0.63842	0.670383
1441	0.683332	0.639587	0.671473
1442	0.684175	0.640448	0.67227
1443	0.68502	0.641312	0.673071
1444	0.685719	0.642018	0.673688
1445	0.686418	0.642724	0.674303
1446	0.686994	0.643285	0.674797
1447	0.687564	0.643837	0.675284
1448	0.688095	0.64431	0.675726
1449	0.688622	0.644773	0.676163
1450	0.689108	0.645168	0.676546
1451	0.689589	0.645553	0.67692
1452	0.690062	0.645873	0.677235
1453	0.690534	0.646178	0.677536
1454	0.691002	0.646481	0.677823
1455	0.691472	0.646784	0.678104
1456	0.691919	0.647064	0.678361
1457	0.692358	0.647337	0.678607
1458	0.692777	0.64759	0.678845
1459	0.693189	0.647834	0.679079
1460	0.693575	0.648048	0.67926
1461	0.693948	0.648244	0.679413
1462	0.694288	0.64846	0.679592
1463	0.694606	0.648688	0.67979
1464	0.694929	0.648923	0.679977
1465	0.695252	0.649162	0.680156
1466	0.695567	0.649384	0.680333
1467	0.695872	0.649588	0.680507
1468	0.696186	0.64981	0.680686
1469	0.696511	0.650053	0.68087
1470	0.696828	0.65029	0.681053
1471	0.697135	0.65052	0.681239
1472	0.697462	0.650764	0.681438
1473	0.697814	0.651031	0.681656
1474	0.698144	0.651278	0.681857
1475	0.698434	0.651492	0.682025
1476	0.698737	0.651716	0.682212
1477	0.699064	0.651962	0.682441
1478	0.699373	0.652202	0.682657
1479	0.69964	0.652428	0.68284
1480	0.69991	0.652657	0.683026
1481	0.700186	0.652895	0.683216
1482	0.70046	0.653135	0.683407
1483	0.700723	0.653376	0.683602
1484	0.700989	0.653615	0.683795
1485	0.701266	0.653846	0.683987
1486	0.701543	0.654078	0.684184
1487	0.701813	0.654322	0.684399
1488	0.70208	0.654563	0.68461
1489	0.702318	0.654773	0.684787
1490	0.702555	0.654984	0.684966
1491	0.702779	0.655204	0.685159
1492	0.703003	0.655425	0.685354
1493	0.703224	0.655624	0.685559
1494	0.703445	0.655825	0.685765
1495	0.703644	0.656051	0.685961
1496	0.703844	0.656277	0.686158
1497	0.704025	0.656481	0.686358
1498	0.704206	0.656686	0.686558
1499	0.704409	0.656928	0.686769
1500	0.704614	0.657174	0.686982
1501	0.704793	0.657402	0.687206
1502	0.70497	0.657629	0.687433
1503	0.705142	0.657814	0.687635
1504	0.705313	0.657994	0.687834
1505	0.705509	0.658215	0.688046
1506	0.705711	0.658445	0.688261
1507	0.705925	0.658675	0.688481
1508	0.706141	0.658904	0.688703
1509	0.706358	0.659135	0.688928
1510	0.706574	0.659367	0.689155
1511	0.706764	0.659594	0.689377
1512	0.706945	0.659818	0.689598
1513	0.707139	0.660061	0.689823
1514	0.707337	0.660311	0.690051
1515	0.707523	0.660534	0.690274
1516	0.707705	0.660748	0.690494
1517	0.707883	0.660963	0.69073
1518	0.708061	0.66118	0.690974
1519	0.708258	0.661418	0.691242
1520	0.708465	0.661664	0.691521
1521	0.708646	0.661901	0.691803
1522	0.708814	0.662136	0.692088
1523	0.708979	0.662362	0.692359
1524	0.709141	0.662581	0.692621
1525	0.709312	0.662799	0.692882
1526	0.709491	0.663018	0.693142
1527	0.70966	0.663243	0.693402
1528	0.709823	0.663477	0.693664
1529	0.709991	0.663708	0.693924
1530	0.710162	0.663937	0.694178
1531	0.710316	0.664149	0.694416
1532	0.710461	0.664349	0.694644
1533	0.710609	0.664557	0.694854
1534	0.710753	0.664763	0.695041
1535	0.710896	0.664956	0.695226
1536	0.711042	0.665139	0.695416
1537	0.711199	0.665338	0.695637
1538	0.711366	0.665551	0.695885
1539	0.711506	0.665749	0.696107
1540	0.711617	0.665931	0.696302
1541	0.711732	0.66611	0.696496
1542	0.711859	0.666291	0.696685
1543	0.711973	0.666461	0.696863
1544	0.712066	0.666613	0.697027
1545	0.712155	0.666766	0.69719
1546	0.712227	0.666914	0.697341
1547	0.712304	0.667075	0.69751
1548	0.712399	0.667261	0.697717
1549	0.712493	0.667432	0.697918
1550	0.712577	0.667575	0.698103
1551	0.712659	0.667721	0.698293
1552	0.71274	0.667872	0.69849
1553	0.712813	0.668017	0.698667
1554	0.712877	0.668155	0.698814
1555	0.712958	0.668296	0.698974
1556	0.713068	0.66844	0.699153
1557	0.713167	0.668576	0.69932
1558	0.713246	0.6687	0.699472
1559	0.713331	0.668822	0.699625
1560	0.713424	0.668935	0.699769
1561	0.713508	0.669043	0.699908
1562	0.713575	0.669146	0.70005
1563	0.713654	0.669266	0.700206
1564	0.713759	0.669426	0.700377
1565	0.713856	0.669568	0.700528
1566	0.713936	0.66966	0.70063
1567	0.714027	0.669763	0.700744
1568	0.714146	0.669891	0.700897
1569	0.714255	0.670009	0.701042
1570	0.714328	0.670097	0.701149
1571	0.714414	0.670191	0.701255
1572	0.714544	0.6703	0.701353
1573	0.71467	0.670406	0.701448
1574	0.714783	0.670501	0.70153
1575	0.714895	0.670596	0.701615
1576	0.715002	0.670689	0.701692
1577	0.715108	0.670777	0.701766
1578	0.715219	0.670838	0.701851
1579	0.715332	0.670903	0.70194
1580	0.715436	0.670972	0.702023
1581	0.715534	0.671042	0.7021
1582	0.715629	0.671132	0.702177
1583	0.715722	0.671218	0.702252
1584	0.715801	0.671273	0.702297
1585	0.715888	0.671333	0.702344
1586	0.716003	0.671391	0.702392
1587	0.716111	0.671444	0.702434
1588	0.716173	0.671465	0.702437
1589	0.716237	0.671481	0.70244
1590	0.716322	0.671501	0.702454
1591	0.716412	0.671533	0.702471
1592	0.716537	0.671608	0.702494
1593	0.716657	0.671676	0.702514
1594	0.716727	0.671695	0.70251
1595	0.716797	0.671713	0.702499
1596	0.716887	0.671744	0.702476
1597	0.716981	0.671778	0.702459
1598	0.717074	0.671799	0.702462
1599	0.71716	0.671812	0.702455
1600	0.717239	0.671807	0.702424
1601	0.717319	0.671802	0.702394
1602	0.717388	0.671801	0.702351
1603	0.717457	0.671803	0.70231
1604	0.717494	0.671803	0.70227
1605	0.717527	0.671799	0.702227
1606	0.717542	0.671787	0.702171
1607	0.717562	0.671774	0.702119
1608	0.717627	0.671762	0.702077
1609	0.717684	0.671741	0.702026
1610	0.717681	0.67166	0.701942
1611	0.717686	0.671586	0.701867
1612	0.717752	0.671569	0.701843
1613	0.717817	0.67156	0.701819
1614	0.717877	0.671587	0.701804
1615	0.717937	0.671613	0.701786
1616	0.717996	0.671635	0.701742
1617	0.718057	0.671656	0.701704
1618	0.718129	0.671661	0.701696
1619	0.718193	0.67166	0.701679
1620	0.718206	0.671626	0.701616
1621	0.71822	0.6716	0.701557
1622	0.718213	0.671579	0.701505
1623	0.718212	0.671561	0.701457
1624	0.718269	0.67158	0.70145
1625	0.718325	0.671596	0.701446
1626	0.71836	0.671595	0.701473
1627	0.718397	0.671599	0.701494
1628	0.718431	0.671631	0.701458
1629	0.718468	0.671663	0.701428
1630	0.718504	0.671676	0.701451
1631	0.718542	0.671686	0.70147
1632	0.71862	0.671679	0.70146
1633	0.718686	0.671669	0.70145
1634	0.718694	0.671658	0.701449
1635	0.71871	0.671645	0.701446
1636	0.718745	0.671619	0.701436
1637	0.718776	0.671601	0.701432
1638	0.718795	0.671625	0.701454
1639	0.718811	0.671645	0.701475
1640	0.718801	0.671645	0.701503
1641	0.7188	0.671651	0.701535
1642	0.718839	0.671681	0.701569
1643	0.718875	0.671715	0.701608
1644	0.718895	0.671754	0.701664
1645	0.718912	0.671788	0.70172
1646	0.71893	0.67181	0.701765
1647	0.718942	0.671832	0.70181
1648	0.718941	0.671863	0.70188
1649	0.718953	0.671907	0.701955
1650	0.718988	0.671982	0.702033
1651	0.719026	0.672056	0.702112
1652	0.719079	0.672125	0.702194
1653	0.719126	0.672194	0.702284
1654	0.719168	0.672265	0.702396
1655	0.719213	0.672332	0.702497
1656	0.719255	0.672386	0.702564
1657	0.719292	0.672452	0.702642
1658	0.719321	0.672557	0.702748
1659	0.719341	0.672649	0.702846
1660	0.719327	0.6727	0.702918
1661	0.719315	0.672754	0.702991
1662	0.719325	0.672827	0.703073
1663	0.719338	0.672895	0.703159
1664	0.71935	0.672942	0.703246
1665	0.719363	0.672996	0.703344
1666	0.719378	0.673063	0.703461
1667	0.719399	0.673133	0.703575
1668	0.719434	0.673205	0.703684
1669	0.719461	0.673275	0.7038
1670	0.719473	0.673349	0.703928
1671	0.719483	0.673427	0.704062
1672	0.719494	0.673509	0.70421
1673	0.71951	0.673597	0.704356
1674	0.719535	0.673698	0.704494
1675	0.719543	0.673792	0.704614
1676	0.719523	0.673876	0.704709
1677	0.719502	0.67397	0.704816
1678	0.719482	0.674078	0.704939
1679	0.719475	0.674183	0.705072
1680	0.71948	0.674281	0.705215
1681	0.719479	0.674376	0.705343
1682	0.719465	0.67446	0.705451
1683	0.719467	0.674544	0.70557
1684	0.719486	0.674631	0.705704
1685	0.71949	0.674727	0.705837
1686	0.719484	0.674834	0.705973
1687	0.7195	0.674938	0.706103
1688	0.71953	0.675039	0.706221
1689	0.719545	0.675127	0.706327
1690	0.719557	0.675209	0.706431
1691	0.71954	0.675287	0.706524
1692	0.719498	0.675361	0.706609
1693	0.719472	0.675456	0.706713
1694	0.719456	0.675564	0.706828
1695	0.719458	0.67568	0.706972
1696	0.719466	0.675798	0.707131
1697	0.719392	0.675856	0.707209
1698	0.719284	0.675892	0.707252
1699	0.719258	0.675939	0.707353
1700	0.719264	0.675985	0.70748
1701	0.719244	0.676057	0.707552
1702	0.71921	0.67614	0.707597
1703	0.719167	0.676199	0.707679
1704	0.719123	0.676253	0.707779
1705	0.719131	0.676337	0.70789
1706	0.71916	0.676433	0.708006
1707	0.719153	0.676528	0.708103
1708	0.71913	0.676621	0.708194
1709	0.719099	0.676697	0.708291
1710	0.719063	0.67677	0.708387
1711	0.718992	0.676828	0.708439
1712	0.718917	0.676884	0.708485
1713	0.718848	0.67693	0.708551
1714	0.718781	0.676977	0.708623
1715	0.718695	0.677002	0.708695
1716	0.718602	0.677023	0.708764
1717	0.718453	0.676993	0.708732
1718	0.718299	0.676958	0.708691
1719	0.718178	0.676892	0.708687
1720	0.718057	0.676825	0.708684
1721	0.717964	0.676812	0.708674
1722	0.71787	0.676798	0.708665
1723	0.717786	0.676797	0.708638
1724	0.717699	0.676796	0.708609
1725	0.717594	0.67679	0.708571
1726	0.717489	0.676781	0.708532
1727	0.717379	0.676712	0.708454
1728	0.717265	0.676643	0.708376
1729	0.717137	0.676585	0.708318
1730	0.717013	0.676524	0.708252
1731	0.716903	0.676427	0.708118
1732	0.716783	0.676328	0.707992
1733	0.716617	0.676224	0.707906
1734	0.716454	0.676122	0.707808
1735	0.716325	0.676035	0.707669
1736	0.716172	0.675923	0.70753
1737	0.715947	0.675734	0.707397
1738	0.71576	0.675584	0.70727
1739	0.715681	0.675544	0.707164
1740	0.715576	0.675481	0.70707
1741	0.715406	0.675362	0.707001
1742	0.715252	0.675247	0.706916
1743	0.71513	0.67514	0.706802
1744	0.715004	0.675023	0.70666
1745	0.714871	0.674892	0.706475
1746	0.714725	0.674753	0.706299
1747	0.71456	0.674604	0.706137
1748	0.714432	0.674451	0.705961
1749	0.714348	0.674291	0.705769
1750	0.714256	0.674151	0.705572
1751	0.714156	0.674034	0.705372
1752	0.714042	0.673924	0.7052
1753	0.713914	0.673821	0.70505
1754	0.713793	0.673705	0.704887
1755	0.713676	0.673578	0.704714
1756	0.713532	0.673404	0.704503
1757	0.713372	0.673199	0.704267
1758	0.71319	0.673035	0.704037
1759	0.712995	0.672893	0.703808
1760	0.712851	0.672778	0.703578
1761	0.71273	0.672674	0.703345
1762	0.712556	0.672487	0.703073
1763	0.71236	0.67227	0.702784
1764	0.712162	0.672103	0.702579
1765	0.711961	0.671948	0.702395
1766	0.71178	0.6718	0.702193
1767	0.711601	0.671652	0.701987
1768	0.711372	0.671466	0.701674
1769	0.711133	0.671271	0.70134
1770	0.710889	0.671126	0.701041
1771	0.710641	0.670987	0.700745
1772	0.710355	0.670802	0.700448
1773	0.710067	0.670615	0.700147
1774	0.709742	0.670397	0.699802
1775	0.709416	0.670175	0.699458
1776	0.709112	0.669954	0.699127
1777	0.708802	0.669739	0.698795
1778	0.708455	0.66957	0.698483
1779	0.708106	0.669394	0.698161
1780	0.707789	0.669212	0.697822
1781	0.707455	0.669031	0.697494
1782	0.70885	0.669673	0.698651
1783	0.708461	0.669553	0.698366
1784	0.708099	0.669385	0.698116
1785	0.707763	0.669218	0.6979
1786	0.707434	0.669116	0.697723
1787	0.707092	0.669024	0.69756
1788	0.706765	0.668947	0.697398
1789	0.706469	0.66887	0.697207
1790	0.706198	0.66878	0.697019
1791	0.705954	0.668684	0.696855
1792	0.70572	0.66859	0.696697
1793	0.705471	0.66848	0.696522
1794	0.705223	0.668371	0.696346
1795	0.705083	0.668348	0.696269
1796	0.704984	0.668346	0.696227
1797	0.704914	0.668352	0.696217
1798	0.704865	0.668382	0.696209
1799	0.704848	0.668402	0.696166
1800	0.704878	0.668379	0.696102
1801	0.704911	0.668352	0.696052
1802	0.704941	0.668358	0.696051
1803	0.704976	0.66838	0.696065
1804	0.705108	0.668495	0.69615
1805	0.705265	0.668625	0.696243
1806	0.705357	0.668692	0.696284
1807	0.705433	0.668733	0.69632
1808	0.705439	0.668728	0.696318
1809	0.705375	0.668694	0.696272
1810	0.705314	0.66869	0.696238
1811	0.705293	0.668737	0.696223
1812	0.705271	0.668775	0.696213
1813	0.705214	0.668783	0.69619
1814	0.705164	0.668789	0.696163
1815	0.705141	0.668807	0.696135
1816	0.705108	0.668833	0.696112
1817	0.705126	0.668878	0.696125
1818	0.705177	0.668926	0.696147
1819	0.705279	0.668993	0.696205
1820	0.705405	0.66907	0.696294
1821	0.705565	0.669141	0.696413
1822	0.705785	0.669192	0.696576
1823	0.706005	0.669242	0.696725
1824	0.706271	0.669305	0.696852
1825	0.706535	0.669368	0.696977
1826	0.706766	0.669389	0.697081
1827	0.707009	0.669402	0.697188
1828	0.707245	0.669439	0.697321
1829	0.707476	0.669494	0.697464
1830	0.707673	0.669544	0.697592
1831	0.707839	0.66956	0.6977
1832	0.707969	0.669553	0.697777
1833	0.708061	0.669537	0.697848
1834	0.708148	0.669523	0.697913
1835	0.708141	0.669506	0.697896
1836	0.708124	0.669489	0.697873
1837	0.708129	0.669473	0.697901
1838	0.708126	0.669442	0.69793
1839	0.708182	0.669431	0.697951
1840	0.708243	0.66944	0.697949
1841	0.708357	0.669461	0.697995
1842	0.708501	0.669484	0.698095
1843	0.708712	0.669512	0.698227
1844	0.709084	0.669578	0.698441
1845	0.709462	0.669653	0.698662
1846	0.709921	0.669755	0.698889
1847	0.710384	0.669854	0.699107
1848	0.710902	0.669919	0.699334
1849	0.711457	0.669994	0.699596
1850	0.712001	0.67007	0.699862
1851	0.712542	0.670136	0.700124
1852	0.713064	0.670182	0.700378
1853	0.713597	0.670241	0.700646
1854	0.714044	0.67028	0.700866
1855	0.714306	0.67025	0.70095
1856	0.714551	0.6702	0.701017
1857	0.71469	0.670035	0.700996
1858	0.714813	0.66986	0.700967
1859	0.714804	0.669661	0.700897
1860	0.714782	0.669465	0.700833
1861	0.714686	0.669189	0.700681
1862	0.714548	0.668875	0.700478
1863	0.714334	0.668508	0.700233
1864	0.714047	0.668108	0.699939
1865	0.71373	0.667664	0.699609
1866	0.713332	0.667141	0.69923
1867	0.712913	0.66659	0.698824
1868	0.712385	0.665889	0.698302
1869	0.711852	0.665175	0.69777
1870	0.711239	0.664322	0.697101
1871	0.710609	0.663448	0.696411
1872	0.709959	0.662519	0.695698
1873	0.709316	0.661574	0.694982
1874	0.708599	0.660556	0.694188
1875	0.707818	0.659477	0.693322
1876	0.707031	0.658372	0.692438
1877	0.706223	0.657189	0.691512
1878	0.705366	0.655968	0.690542
1879	0.704351	0.654595	0.689408
1880	0.703339	0.653223	0.68828
1881	0.7023	0.651809	0.687136
1882	0.70126	0.650398	0.685991
1883	0.700051	0.648834	0.684717
1884	0.69881	0.647231	0.68342
1885	0.697528	0.645582	0.682062
1886	0.696208	0.64391	0.680664
1887	0.69481	0.642144	0.679193
1888	0.693302	0.640254	0.677617
1889	0.691796	0.638369	0.676048
1890	0.690272	0.636446	0.674478
1891	0.688732	0.634509	0.672894
1892	0.687059	0.632432	0.671167
1893	0.685376	0.630345	0.669429
1894	0.683698	0.628319	0.667699
1895	0.682013	0.626294	0.665956
1896	0.680297	0.624285	0.664222
1897	0.678551	0.622243	0.662476
1898	0.676896	0.620329	0.66084
1899	0.675298	0.618516	0.65927
1900	0.673741	0.616787	0.657762
1901	0.672259	0.615187	0.656362
1902	0.670812	0.61364	0.655007
1903	0.669511	0.612363	0.653852
1904	0.668224	0.611106	0.652713
1905	0.667128	0.610119	0.651806
1906	0.666047	0.609153	0.650919
1907	0.665156	0.608478	0.650273
1908	0.664317	0.60789	0.649696
1909	0.663563	0.607453	0.649215
1910	0.662869	0.607118	0.648804
1911	0.662259	0.606894	0.648496
1912	0.661771	0.606841	0.64835
1913	0.661318	0.606832	0.648244
1914	0.660985	0.606987	0.648281
1915	0.660661	0.607145	0.648321
1916	0.660445	0.60736	0.648388
1917	0.660234	0.607578	0.648458
1918	0.660067	0.607867	0.648591
1919	0.659903	0.608173	0.648733
1920	0.659766	0.608494	0.648896
1921	0.65965	0.608827	0.649081
1922	0.659548	0.609148	0.649262
1923	0.659456	0.609466	0.649447
1924	0.659351	0.609772	0.649616
1925	0.659237	0.610066	0.649763
1926	0.659134	0.610355	0.649907
1927	0.65907	0.61061	0.650038
1928	0.659004	0.610863	0.650166
1929	0.658898	0.611095	0.650244
1930	0.65879	0.611327	0.65032
1931	0.658709	0.611547	0.650429
1932	0.658639	0.611764	0.650541
1933	0.658606	0.611981	0.650643
1934	0.658576	0.612189	0.650734
1935	0.658543	0.612376	0.650826
1936	0.658508	0.612551	0.65092
1937	0.658496	0.612737	0.651028
1938	0.65851	0.612933	0.651149
1939	0.658546	0.613138	0.651278
1940	0.658657	0.613362	0.651435
1941	0.658766	0.613586	0.651592
1942	0.658941	0.613875	0.651776
1943	0.65912	0.614168	0.651963
1944	0.659347	0.614479	0.652179
1945	0.659583	0.61479	0.652404
1946	0.659827	0.615084	0.652629
1947	0.660074	0.615362	0.652849
1948	0.660308	0.61565	0.653085
1949	0.660536	0.615952	0.653325
1950	0.66081	0.616283	0.653583
1951	0.661157	0.616668	0.653872
1952	0.661503	0.617052	0.654168
1953	0.661848	0.617442	0.654489
1954	0.662195	0.617834	0.654808
1955	0.662536	0.618248	0.655144
1956	0.662877	0.618662	0.655479
1957	0.663194	0.619055	0.655791
1958	0.663511	0.619447	0.6561
1959	0.663866	0.619839	0.656418
1960	0.664229	0.620226	0.656733
1961	0.664609	0.620617	0.657055
1962	0.665015	0.621022	0.657391
1963	0.66541	0.621417	0.657702
1964	0.665781	0.62179	0.657972
1965	0.666152	0.622174	0.658256
1966	0.666526	0.622589	0.658573
1967	0.666902	0.623005	0.658889
1968	0.6673	0.623428	0.659208
1969	0.667699	0.623851	0.659528
1970	0.668062	0.624233	0.659808
1971	0.668426	0.624613	0.660086
1972	0.668829	0.625026	0.660425
1973	0.669237	0.625449	0.660778
1974	0.669653	0.62591	0.661132
1975	0.67008	0.626395	0.661491
1976	0.670505	0.626875	0.661868
1977	0.670929	0.627351	0.662262
1978	0.671361	0.627835	0.662658
1979	0.671816	0.628348	0.663064
1980	0.672267	0.628857	0.663467
1981	0.672675	0.629331	0.663839
1982	0.673082	0.629805	0.66421
1983	0.673449	0.630264	0.664581
1984	0.673817	0.630724	0.664953
1985	0.674182	0.631206	0.665313
1986	0.674547	0.631692	0.665669
1987	0.674897	0.632172	0.666021
1988	0.675242	0.632653	0.666374
1989	0.675581	0.633143	0.666743
1990	0.67591	0.633637	0.667121
1991	0.676243	0.634138	0.667495
1992	0.676581	0.634648	0.667862
1993	0.676914	0.635161	0.668232
1994	0.677232	0.635687	0.668609
1995	0.677553	0.636214	0.668989
1996	0.677879	0.636749	0.669392
1997	0.678205	0.637286	0.669796
1998	0.678545	0.637828	0.670188
1999	0.678886	0.638373	0.670583
2000	0.679191	0.638899	0.670972
2001	0.679488	0.639423	0.67136
2002	0.679784	0.639933	0.671748
2003	0.680079	0.640435	0.672135
2004	0.680406	0.64095	0.672515
2005	0.680766	0.641477	0.67289
2006	0.681112	0.641995	0.673265
2007	0.681439	0.642497	0.673645
2008	0.681764	0.643004	0.674026
2009	0.682079	0.64352	0.674409
2010	0.682396	0.644036	0.674791
2011	0.682711	0.644543	0.675154
2012	0.683026	0.645051	0.675517
2013	0.683255	0.64549	0.675863
2014	0.68348	0.645926	0.676208
2015	0.683709	0.646392	0.676548
2016	0.68394	0.646868	0.676889
2017	0.684139	0.647333	0.677199
2018	0.684323	0.647794	0.677494
2019	0.684508	0.648242	0.677823
2020	0.684694	0.648679	0.678184
2021	0.684873	0.64912	0.678513
2022	0.68504	0.649566	0.67879
2023	0.685206	0.650016	0.679066
2024	0.685364	0.650475	0.679342
2025	0.685521	0.65093	0.679621
2026	0.685652	0.651345	0.679914
2027	0.685784	0.651761	0.680208
2028	0.685902	0.65216	0.680439
2029	0.686021	0.652558	0.680668
2030	0.68612	0.652911	0.680892
2031	0.686215	0.653255	0.681114
2032	0.686301	0.653592	0.681352
2033	0.686384	0.653925	0.681596
2034	0.686445	0.654234	0.68182
2035	0.68649	0.654525	0.682028
2036	0.686534	0.654815	0.682232
2037	0.686577	0.655106	0.682431
2038	0.68662	0.655395	0.682626
2039	0.686659	0.655682	0.682811
2040	0.686681	0.655967	0.682989
2041	0.686614	0.656233	0.683135
2042	0.686546	0.656499	0.68328
2043	0.686505	0.656757	0.683423
2044	0.686465	0.657015	0.683565
2045	0.68639	0.657272	0.683704
2046	0.686311	0.65753	0.683842
2047	0.686197	0.657764	0.683952
2048	0.68607	0.657993	0.684055
2049	0.685921	0.658175	0.684121
2050	0.685759	0.658331	0.684165
2051	0.685596	0.658527	0.684224
2052	0.685429	0.658765	0.684296
2053	0.685257	0.658977	0.684354
2054	0.685068	0.65914	0.684385
2055	0.684845	0.659289	0.684397
2056	0.684529	0.659394	0.684358
2057	0.684213	0.659491	0.684311
2058	0.683882	0.659533	0.684209
2059	0.683549	0.659574	0.684107
2060	0.6831	0.659623	0.683993
2061	0.682647	0.659673	0.683877
2062	0.682107	0.659638	0.683663
2063	0.681555	0.659592	0.683435
2064	0.680959	0.659554	0.683214
2065	0.680348	0.659518	0.682993
2066	0.6797	0.659469	0.682763
2067	0.679033	0.659413	0.682532
2068	0.678341	0.659337	0.682278
2069	0.677632	0.65924	0.682
2070	0.676917	0.65913	0.681698
2071	0.676205	0.659003	0.681366
2072	0.675495	0.65886	0.681037
2073	0.674776	0.658663	0.680708
2074	0.67406	0.658464	0.680384
2075	0.673371	0.658256	0.680077
2076	0.672677	0.658043	0.679764
2077	0.671915	0.657792	0.679394
2078	0.671151	0.657541	0.679024
2079	0.670385	0.65726	0.67859
2080	0.669613	0.656973	0.678142
2081	0.668782	0.656653	0.677676
2082	0.667938	0.656326	0.677207
2083	0.667064	0.655958	0.67671
2084	0.66618	0.655568	0.676201
2085	0.665341	0.655196	0.675717
2086	0.664544	0.65484	0.67526
2087	0.663799	0.654486	0.674821
2088	0.663125	0.654136	0.674407
2089	0.662481	0.653781	0.674007
2090	0.661912	0.653427	0.673647
2091	0.661389	0.653088	0.673317
2092	0.661	0.652794	0.673077
2093	0.660616	0.652497	0.672835
2094	0.660238	0.652175	0.672541
2095	0.65986	0.651852	0.67225
2096	0.65947	0.651526	0.671994
2097	0.659074	0.651197	0.671737
2098	0.65856	0.650785	0.671355
2099	0.658018	0.650359	0.670953
2100	0.657343	0.649948	0.670525
2101	0.65662	0.649539	0.670086
2102	0.65572	0.649105	0.669537
2103	0.654719	0.648654	0.668919
2104	0.653581	0.648142	0.668238
2105	0.652343	0.64758	0.667514
2106	0.651009	0.647	0.66672
2107	0.649584	0.646412	0.665857
2108	0.648141	0.64582	0.664991
2109	0.646715	0.645244	0.664151
2110	0.645293	0.644674	0.663312
2111	0.643976	0.644147	0.662529
2112	0.642685	0.643631	0.661765
2113	0.641623	0.64323	0.661166
2114	0.640567	0.642834	0.660574
2115	0.639702	0.642536	0.660122
2116	0.638837	0.642239	0.659671
2117	0.638249	0.642026	0.659348
2118	0.637672	0.641824	0.659034
2119	0.637175	0.641665	0.658797
2120	0.636668	0.641498	0.658553
2121	0.636074	0.641329	0.658292
2122	0.635428	0.641159	0.658016
2123	0.634716	0.640948	0.657675
2124	0.63394	0.640702	0.657276
2125	0.633044	0.640438	0.656803
2126	0.632024	0.640141	0.656248
2127	0.630881	0.6398	0.655607
2128	0.629548	0.639395	0.654837
2129	0.628102	0.638923	0.653977
2130	0.626406	0.638306	0.652897
2131	0.624604	0.637644	0.651747
2132	0.622368	0.636773	0.650303
2133	0.620083	0.635879	0.64882
2134	0.617509	0.634847	0.647109
2135	0.614897	0.633797	0.645368
2136	0.611642	0.632388	0.643125
2137	0.608341	0.630955	0.640848
2138	0.604636	0.629338	0.638285
2139	0.600882	0.627691	0.635681
2140	0.596542	0.625647	0.632579
2141	0.592077	0.623519	0.629366
2142	0.587365	0.621239	0.625945
2143	0.582567	0.618902	0.622454
2144	0.577339	0.616268	0.618571
2145	0.571886	0.61347	0.61447
2146	0.566408	0.610601	0.610363
2147	0.560962	0.607684	0.606289
2148	0.555438	0.60467	0.602097
2149	0.549885	0.601576	0.597811
2150	0.544458	0.598474	0.593573
2151	0.53935	0.595395	0.589495
2152	0.534273	0.592272	0.585424
2153	0.529407	0.589083	0.581452
2154	0.524646	0.585922	0.57754
2155	0.520509	0.582943	0.574008
2156	0.516411	0.579946	0.57049
2157	0.512946	0.576975	0.567322
2158	0.509515	0.574004	0.56417
2159	0.50681	0.57127	0.56149
2160	0.504132	0.56854	0.558825
2161	0.502025	0.565805	0.556475
2162	0.499967	0.563055	0.554144
2163	0.498497	0.560549	0.552246
2164	0.497112	0.558079	0.550414
2165	0.496105	0.555577	0.548727
2166	0.495202	0.553044	0.547067
2167	0.494594	0.550609	0.545598
2168	0.494109	0.548219	0.54421
2169	0.493717	0.545704	0.54282
2170	0.493358	0.543071	0.541395
2171	0.493039	0.540433	0.540007
2172	0.492729	0.537784	0.538638
2173	0.49242	0.535048	0.53721
2174	0.492091	0.532182	0.535681
2175	0.491728	0.529285	0.534102
2176	0.491254	0.526324	0.532405
2177	0.490718	0.523267	0.530633
2178	0.489938	0.519961	0.528636
2179	0.489117	0.516641	0.52661
2180	0.48806	0.513326	0.524444
2181	0.486969	0.509973	0.522246
2182	0.485548	0.506417	0.519775
2183	0.484094	0.502844	0.517272
2184	0.482332	0.499361	0.514628
2185	0.480543	0.495867	0.511969
2186	0.478447	0.492288	0.509125
2187	0.476322	0.488697	0.506257
2188	0.474086	0.485322	0.503391
2189	0.471841	0.481985	0.500537
2190	0.469435	0.478743	0.497687
2191	0.466989	0.475523	0.494834
2192	0.464532	0.472592	0.492115
2193	0.462046	0.469768	0.489429
2194	0.459349	0.467043	0.486693
2195	0.456459	0.464352	0.483888
2196	0.453357	0.461814	0.481051
2197	0.450039	0.459375	0.478143
2198	0.446432	0.456983	0.475112
2199	0.44251	0.454644	0.47194
2200	0.438413	0.452409	0.468726
2201	0.434239	0.450388	0.465574
2202	0.429986	0.448465	0.462411
2203	0.425986	0.446863	0.459522
2204	0.422259	0.445488	0.456888
2205	0.419804	0.444885	0.455266
2206	0.417705	0.444489	0.45391
2207	0.417636	0.445128	0.454057
2208	0.417943	0.445958	0.454492
2209	0.420749	0.448013	0.45683
2210	0.423889	0.450237	0.459425
2211	0.429801	0.45378	0.464091
2212	0.435959	0.45744	0.468934
2213	0.443762	0.461901	0.474962
2214	0.451654	0.466411	0.481059
2215	0.460648	0.471451	0.487964
2216	0.46964	0.476505	0.494866
2217	0.478282	0.481465	0.501557
2218	0.486761	0.486368	0.508143
2219	0.494776	0.491248	0.514447
2220	0.502624	0.4961	0.520645
2221	0.509154	0.500369	0.52592
2222	0.515262	0.504457	0.530902
2223	0.520447	0.508238	0.535246
2224	0.52526	0.511897	0.539339
2225	0.529261	0.515218	0.542858
2226	0.532838	0.51837	0.546078
2227	0.535928	0.521343	0.549015
2228	0.538679	0.52418	0.551752
2229	0.540987	0.526809	0.554146
2230	0.542894	0.529235	0.556232
2231	0.544529	0.531508	0.55812
2232	0.545869	0.533611	0.55978
2233	0.547016	0.53558	0.561291
2234	0.547885	0.537332	0.56259
2235	0.548646	0.53903	0.563807
2236	0.549243	0.540632	0.564882
2237	0.549765	0.542149	0.565881
2238	0.550128	0.543456	0.566699
2239	0.550464	0.544747	0.567481
2240	0.550718	0.545969	0.568129
2241	0.550958	0.547163	0.568762
2242	0.551158	0.5482	0.569357
2243	0.551354	0.549244	0.569954
2244	0.551524	0.550304	0.570554
2245	0.5517	0.551365	0.571157
2246	0.551914	0.552336	0.571702
2247	0.552129	0.553311	0.572248
2248	0.552302	0.554221	0.572737
2249	0.552473	0.555136	0.573227
2250	0.552613	0.555967	0.573711
2251	0.55275	0.556798	0.574199
2252	0.5528	0.557605	0.574561
2253	0.552838	0.558415	0.57491
2254	0.552777	0.559172	0.575206
2255	0.55269	0.559923	0.575488
2256	0.552529	0.560627	0.575706
2257	0.552357	0.561326	0.575911
2258	0.55214	0.561962	0.57604
2259	0.551912	0.562588	0.576151
2260	0.551631	0.56313	0.576218
2261	0.551322	0.563641	0.576268
2262	0.55095	0.564067	0.576273
2263	0.550543	0.564437	0.57624
2264	0.550125	0.56478	0.576156
2265	0.549694	0.565115	0.576042
2266	0.549181	0.565343	0.575876
2267	0.5486	0.565486	0.575669
2268	0.547953	0.565574	0.575377
2269	0.547254	0.565623	0.575015
2270	0.546497	0.565629	0.574598
2271	0.545674	0.565579	0.574121
2272	0.544809	0.565472	0.573635
2273	0.5439	0.565302	0.573148
2274	0.542936	0.565071	0.572605
2275	0.541902	0.564744	0.571975
2276	0.540877	0.564405	0.571311
2277	0.539873	0.564061	0.570599
2278	0.53887	0.563692	0.569876
2279	0.537885	0.563266	0.569132
2280	0.5369	0.562822	0.568379
2281	0.535949	0.562344	0.567637
2282	0.534992	0.56186	0.566892
2283	0.534048	0.561376	0.566179
2284	0.533101	0.560852	0.565447
2285	0.532181	0.56018	0.564648
2286	0.531269	0.559499	0.563852
2287	0.530435	0.558815	0.56313
2288	0.529596	0.558119	0.562393
2289	0.528796	0.557412	0.561618
2290	0.528	0.556701	0.560846
2291	0.527284	0.555992	0.560165
2292	0.526551	0.555266	0.559462
2293	0.525701	0.554443	0.558568
2294	0.524839	0.55361	0.557662
2295	0.524027	0.552821	0.55683
2296	0.523203	0.552019	0.555984
2297	0.522294	0.55103	0.55509
2298	0.52137	0.550025	0.554181
2299	0.520508	0.549103	0.55328
2300	0.519636	0.548169	0.552366
2301	0.51863	0.547053	0.551357
2302	0.517602	0.545908	0.550328
2303	0.516468	0.544821	0.549264
2304	0.515309	0.543726	0.548181
2305	0.514072	0.542494	0.547004
2306	0.512811	0.54123	0.545803
2307	0.511587	0.540004	0.544634
2308	0.510358	0.538773	0.54346
2309	0.509129	0.537509	0.542174
2310	0.507889	0.536226	0.540852
2311	0.506843	0.535095	0.539747
2312	0.505837	0.533992	0.538687
2313	0.504948	0.532838	0.537708
2314	0.504087	0.531662	0.536746
2315	0.50334	0.53061	0.53587
2316	0.502626	0.529593	0.535017
2317	0.501996	0.528494	0.534223
2318	0.501393	0.527357	0.533446
2319	0.500962	0.52647	0.532842
2320	0.500602	0.525681	0.532306
2321	0.500304	0.524874	0.531774
2322	0.500034	0.524055	0.53124
2323	0.499915	0.523376	0.530876
2324	0.499869	0.522765	0.530596
2325	0.499899	0.522084	0.530354
2326	0.499971	0.521362	0.530133
2327	0.500179	0.520707	0.529909
2328	0.500471	0.520085	0.529683
2329	0.50081	0.519498	0.529576
2330	0.501183	0.518934	0.529544
2331	0.501602	0.518369	0.529457
2332	0.502071	0.517808	0.52934
2333	0.502423	0.517262	0.529273
2334	0.502708	0.516729	0.529258
2335	0.502931	0.516202	0.529152
2336	0.50311	0.515677	0.52898
2337	0.503142	0.515063	0.52871
2338	0.503053	0.51436	0.528344
2339	0.502804	0.513677	0.527914
2340	0.502401	0.513013	0.527425
2341	0.501831	0.51229	0.526803
2342	0.501109	0.511505	0.526061
2343	0.500343	0.510777	0.525328
2344	0.499522	0.510112	0.524589
2345	0.498584	0.509459	0.523851
2346	0.497498	0.508809	0.5231
2347	0.496344	0.50812	0.522288
[truncated: 153 more rows]

## Sheet: Table S8
Table S8. VNIR-SWIR reflectance spectra corresponding to mechanic mixtures of sudoite (C) - kaolinite (K) reference minerals from the Athabasca Basin Mineral Standards database
Wavelength	C-K 25:75	C-K 75:25
350	0.210343	0.141045
351	0.214728	0.141708
352	0.215585	0.142878
353	0.242949	0.158571
354	0.258299	0.170965
355	0.269436	0.180332
356	0.284928	0.185
357	0.304446	0.199216
358	0.31886	0.209242
359	0.323198	0.208459
360	0.328772	0.213379
361	0.338234	0.219065
362	0.350464	0.224973
363	0.349217	0.229068
364	0.355419	0.232602
365	0.366596	0.23828
366	0.381726	0.253939
367	0.380883	0.254326
368	0.379025	0.251629
369	0.38421	0.25172
370	0.394484	0.257258
371	0.400971	0.260623
372	0.40291	0.261118
373	0.404859	0.263396
374	0.406899	0.265019
375	0.408277	0.265419
376	0.406118	0.261789
377	0.406491	0.263226
378	0.408532	0.266028
379	0.412382	0.26809
380	0.413701	0.267835
381	0.414942	0.267208
382	0.416541	0.26656
383	0.419963	0.270496
384	0.421207	0.272614
385	0.421311	0.274004
386	0.423771	0.278903
387	0.427073	0.279566
388	0.429459	0.278927
389	0.428761	0.279367
390	0.430759	0.280731
391	0.433451	0.282256
392	0.436445	0.283793
393	0.434603	0.28187
394	0.435693	0.283056
395	0.438821	0.28636
396	0.438557	0.286165
397	0.438757	0.286247
398	0.439607	0.28673
399	0.44182	0.288062
400	0.442539	0.28841
401	0.442674	0.288942
402	0.44247	0.290162
403	0.444437	0.291173
404	0.445603	0.2918
405	0.445857	0.292059
406	0.445753	0.291975
407	0.446281	0.292549
408	0.447038	0.293496
409	0.447393	0.29458
410	0.447945	0.294759
411	0.448682	0.295017
412	0.449676	0.295928
413	0.449295	0.29587
414	0.449461	0.295822
415	0.45038	0.295964
416	0.451506	0.298226
417	0.451858	0.299111
418	0.451865	0.29924
419	0.452541	0.29987
420	0.453199	0.300668
421	0.453608	0.30125
422	0.453491	0.301245
423	0.454348	0.302404
424	0.455537	0.30368
425	0.456955	0.304878
426	0.457201	0.305696
427	0.457685	0.306439
428	0.458373	0.307171
429	0.459229	0.308207
430	0.459819	0.308608
431	0.460406	0.309076
432	0.461304	0.310466
433	0.462554	0.311888
434	0.463628	0.313121
435	0.464354	0.31408
436	0.465019	0.314888
437	0.465748	0.315721
438	0.466516	0.316583
439	0.467152	0.317502
440	0.467362	0.318238
441	0.46757	0.318981
442	0.468467	0.32006
443	0.469191	0.320629
444	0.469841	0.321215
445	0.470439	0.322047
446	0.471229	0.323227
447	0.472096	0.324122
448	0.473	0.324723
449	0.473568	0.325399
450	0.474445	0.326312
451	0.47543	0.327275
452	0.476169	0.32793
453	0.476961	0.328765
454	0.477856	0.32959
455	0.478934	0.330295
456	0.479109	0.330642
457	0.479667	0.331254
458	0.480759	0.332208
459	0.481549	0.333141
460	0.481964	0.333547
461	0.482198	0.33366
462	0.482745	0.334008
463	0.483409	0.334576
464	0.484115	0.335141
465	0.484832	0.335532
466	0.485535	0.336201
467	0.486105	0.336731
468	0.486513	0.33703
469	0.48715	0.337495
470	0.487893	0.33793
471	0.488656	0.338353
472	0.489056	0.338842
473	0.489285	0.339137
474	0.489623	0.339368
475	0.490462	0.339652
476	0.4912	0.340186
477	0.491779	0.340631
478	0.492161	0.340881
479	0.492942	0.341748
480	0.493638	0.342358
481	0.494261	0.342751
482	0.494992	0.343337
483	0.495826	0.344107
484	0.496623	0.344871
485	0.497165	0.345349
486	0.497825	0.34605
487	0.498563	0.346849
488	0.499397	0.347735
489	0.500194	0.348546
490	0.501054	0.349269
491	0.501966	0.349935
492	0.502741	0.350944
493	0.503375	0.351577
494	0.503919	0.352064
495	0.504437	0.352814
496	0.50512	0.353733
497	0.50586	0.354636
498	0.506626	0.355421
499	0.507312	0.35616
500	0.50802	0.356948
501	0.508762	0.357798
502	0.509516	0.358677
503	0.510243	0.359468
504	0.510954	0.36021
505	0.511695	0.361016
506	0.512461	0.361809
507	0.513166	0.362579
508	0.513731	0.363323
509	0.514469	0.364141
510	0.515171	0.364953
511	0.515797	0.365744
512	0.516425	0.366438
513	0.517145	0.367294
514	0.517929	0.368258
515	0.518693	0.369145
516	0.519403	0.369955
517	0.520112	0.370777
518	0.520897	0.371738
519	0.521627	0.372579
520	0.522319	0.373392
521	0.522978	0.374204
522	0.523565	0.374985
523	0.524142	0.375697
524	0.524715	0.376368
525	0.525303	0.377173
526	0.525938	0.378007
527	0.526606	0.378833
528	0.52731	0.379601
529	0.528038	0.38054
530	0.528771	0.381483
531	0.529507	0.382368
532	0.530268	0.383233
533	0.531018	0.384136
534	0.531757	0.385077
535	0.532528	0.385997
536	0.533289	0.386908
537	0.534079	0.387848
538	0.535019	0.388942
539	0.536017	0.390093
540	0.537046	0.391268
541	0.538108	0.392465
542	0.539248	0.393753
543	0.540302	0.39496
544	0.541236	0.396058
545	0.541723	0.396959
546	0.542159	0.397787
547	0.542557	0.398562
548	0.542937	0.399305
549	0.54338	0.400093
550	0.543894	0.400961
551	0.544525	0.401978
552	0.545182	0.402946
553	0.545828	0.403926
554	0.546458	0.404935
555	0.547077	0.405962
556	0.547747	0.407031
557	0.548446	0.408132
558	0.549096	0.409245
559	0.549819	0.410389
560	0.550574	0.411541
561	0.551336	0.412685
562	0.552148	0.413954
563	0.552916	0.415177
564	0.553602	0.416296
565	0.554266	0.417424
566	0.554836	0.4185
567	0.555311	0.419519
568	0.555665	0.42044
569	0.555979	0.421341
570	0.556266	0.422226
571	0.556525	0.423095
572	0.556929	0.424019
573	0.557429	0.425031
574	0.558032	0.426171
575	0.558835	0.427453
576	0.559698	0.428748
577	0.560596	0.430037
578	0.561354	0.431236
579	0.562088	0.432393
580	0.562766	0.433505
581	0.563281	0.434536
582	0.563686	0.435436
583	0.564063	0.436294
584	0.564451	0.437152
585	0.565007	0.438111
586	0.565625	0.43912
587	0.566296	0.440174
588	0.56712	0.441251
589	0.567916	0.442386
590	0.568678	0.443516
591	0.569364	0.444434
592	0.570142	0.445472
593	0.570945	0.446517
594	0.57173	0.447475
595	0.572385	0.448387
596	0.573088	0.449321
597	0.573881	0.450296
598	0.574591	0.451151
599	0.575215	0.451949
600	0.575783	0.452707
601	0.576403	0.453483
602	0.576897	0.454205
603	0.577387	0.45492
604	0.578015	0.455684
605	0.578581	0.45637
606	0.579152	0.457086
607	0.57975	0.457868
608	0.580375	0.458548
609	0.581056	0.459292
610	0.58177	0.460081
611	0.582332	0.460734
612	0.582559	0.461147
613	0.582571	0.461403
614	0.58242	0.461526
615	0.582528	0.46179
616	0.5827	0.462101
617	0.582869	0.462432
618	0.58312	0.462832
619	0.583384	0.463212
620	0.583651	0.463569
621	0.58389	0.463973
622	0.584089	0.464342
623	0.584293	0.464695
624	0.584614	0.46507
625	0.584831	0.465431
626	0.585041	0.465829
627	0.585296	0.46631
628	0.585557	0.466736
629	0.585885	0.467197
630	0.586282	0.467704
631	0.586649	0.468249
632	0.587006	0.468725
633	0.58735	0.469153
634	0.587664	0.469579
635	0.588007	0.470008
636	0.588334	0.470402
637	0.588601	0.470717
638	0.588942	0.471083
639	0.589263	0.471438
640	0.589547	0.47177
641	0.589796	0.472036
642	0.590083	0.472353
643	0.590393	0.472698
644	0.59067	0.472993
645	0.590963	0.473316
646	0.591256	0.473643
647	0.59154	0.473956
648	0.59181	0.474293
649	0.592104	0.474669
650	0.592441	0.475096
651	0.592762	0.47546
652	0.593118	0.475863
653	0.593498	0.476298
654	0.593821	0.476695
655	0.594192	0.477142
656	0.594566	0.477594
657	0.594883	0.477981
658	0.595276	0.478425
659	0.595669	0.478878
660	0.596036	0.479323
661	0.596374	0.479735
662	0.596771	0.480192
663	0.597224	0.480695
664	0.597613	0.481183
665	0.597999	0.481666
666	0.598398	0.482149
667	0.598859	0.482648
668	0.599288	0.483158
669	0.599716	0.483663
670	0.600165	0.484161
671	0.600571	0.484662
672	0.600999	0.485181
673	0.601458	0.485717
674	0.601872	0.486214
675	0.602298	0.486724
676	0.602738	0.487247
677	0.603216	0.487795
678	0.603701	0.48836
679	0.604169	0.488915
680	0.604594	0.489435
681	0.605077	0.489961
682	0.605521	0.490474
683	0.605907	0.490969
684	0.606331	0.491461
685	0.606797	0.492011
686	0.607278	0.492587
687	0.607663	0.493052
688	0.608115	0.493584
689	0.608589	0.494136
690	0.609052	0.494671
691	0.609502	0.495257
692	0.609955	0.495834
693	0.61042	0.496385
694	0.610824	0.496855
695	0.611224	0.497335
696	0.611627	0.497835
697	0.612091	0.498406
698	0.61254	0.498966
699	0.612977	0.499513
700	0.613401	0.500045
701	0.613835	0.500605
702	0.614283	0.501154
703	0.614754	0.501672
704	0.615256	0.502268
705	0.615709	0.502816
706	0.616113	0.503316
707	0.616541	0.50386
708	0.616938	0.50437
709	0.617316	0.504858
710	0.617685	0.505339
711	0.61804	0.505813
712	0.618389	0.506277
713	0.618736	0.506724
714	0.619077	0.507166
715	0.619422	0.507612
716	0.619772	0.508063
717	0.620121	0.508525
718	0.620424	0.508938
719	0.620719	0.509338
720	0.621125	0.509831
721	0.62149	0.510275
722	0.621827	0.510696
723	0.622131	0.511105
724	0.622447	0.511544
725	0.622734	0.511947
726	0.622984	0.512298
727	0.623362	0.512748
728	0.623712	0.513191
729	0.624023	0.513612
730	0.624224	0.513922
731	0.624435	0.514232
732	0.624634	0.514533
733	0.624793	0.51481
734	0.624935	0.515067
735	0.62509	0.515325
736	0.625269	0.51559
737	0.625445	0.515867
738	0.625705	0.516209
739	0.626034	0.516604
740	0.626341	0.516989
741	0.626652	0.517369
742	0.626985	0.51776
743	0.627377	0.518189
744	0.627734	0.51857
745	0.628075	0.518925
746	0.628406	0.519254
747	0.628705	0.519555
748	0.629047	0.519914
749	0.629429	0.520323
750	0.629742	0.520633
751	0.630129	0.521019
752	0.630567	0.521453
753	0.631039	0.521906
754	0.631412	0.522265
755	0.631777	0.52261
756	0.632184	0.522979
757	0.632535	0.523316
758	0.632914	0.523682
759	0.633332	0.524083
760	0.633674	0.524412
761	0.634034	0.524761
762	0.634396	0.525112
763	0.634709	0.5254
764	0.635028	0.525705
765	0.635366	0.526027
766	0.635739	0.526371
767	0.636093	0.526695
768	0.636414	0.526977
769	0.636697	0.527211
770	0.636914	0.527432
771	0.637176	0.527672
772	0.637479	0.527931
773	0.637828	0.528217
774	0.638083	0.528407
775	0.638316	0.528572
776	0.638596	0.528788
777	0.638733	0.528902
778	0.638899	0.529049
779	0.639151	0.529275
780	0.639266	0.529384
781	0.639455	0.529513
782	0.639695	0.529654
783	0.639801	0.529724
784	0.639935	0.52982
785	0.640085	0.529925
786	0.640236	0.530018
787	0.640456	0.530146
788	0.640606	0.530233
789	0.640604	0.530233
790	0.640717	0.53027
791	0.640883	0.530378
792	0.641091	0.530552
793	0.641244	0.530657
794	0.641348	0.530706
795	0.641438	0.530735
796	0.641579	0.530807
797	0.64176	0.530927
798	0.641964	0.531078
799	0.64219	0.531261
800	0.642438	0.531428
801	0.642636	0.531536
802	0.642774	0.531582
803	0.642918	0.531654
804	0.642974	0.531663
805	0.642991	0.531645
806	0.643108	0.531717
807	0.643283	0.531811
808	0.643532	0.531962
809	0.643903	0.532227
810	0.644328	0.532517
811	0.64475	0.532797
812	0.645159	0.533059
813	0.645528	0.533309
814	0.645856	0.533498
815	0.646137	0.533635
816	0.646319	0.533745
817	0.646569	0.533921
818	0.646837	0.534105
819	0.647073	0.534231
820	0.647297	0.534377
821	0.647501	0.53449
822	0.647677	0.534549
823	0.647852	0.53464
824	0.648039	0.534727
825	0.648238	0.534817
826	0.648471	0.534995
827	0.648711	0.535115
828	0.648928	0.535204
829	0.649056	0.535286
830	0.649216	0.535376
831	0.649404	0.535483
832	0.649623	0.535613
833	0.649832	0.535716
834	0.650056	0.535851
835	0.650293	0.536017
836	0.650524	0.536138
837	0.650729	0.536268
838	0.650933	0.536406
839	0.651189	0.536553
840	0.651401	0.536677
841	0.651572	0.53678
842	0.651691	0.536855
843	0.651931	0.537007
844	0.652149	0.537142
845	0.652327	0.537248
846	0.652465	0.537317
847	0.652603	0.537426
848	0.652735	0.537546
849	0.652844	0.537596
850	0.653038	0.537691
851	0.653256	0.537797
852	0.653454	0.537892
853	0.653589	0.537946
854	0.653696	0.538
855	0.653778	0.538061
856	0.653826	0.538087
857	0.653948	0.538164
858	0.654117	0.538269
859	0.654237	0.538316
860	0.65434	0.538363
861	0.654456	0.538435
862	0.654628	0.538578
863	0.654786	0.538666
864	0.654882	0.538714
865	0.654894	0.538719
866	0.655033	0.53879
867	0.655228	0.53896
868	0.655455	0.539194
869	0.655573	0.539263
870	0.655661	0.539318
871	0.655781	0.539408
872	0.656055	0.539631
873	0.656233	0.539754
874	0.656401	0.539878
875	0.65659	0.540047
876	0.656725	0.540159
877	0.656936	0.540309
878	0.65721	0.540493
879	0.657288	0.540588
880	0.65747	0.540766
881	0.657702	0.540989
882	0.657901	0.541195
883	0.658132	0.541379
884	0.658397	0.541578
885	0.65871	0.541814
886	0.658855	0.54197
887	0.659071	0.542182
888	0.659382	0.542464
889	0.659591	0.542679
890	0.659712	0.542788
891	0.659801	0.542853
892	0.660011	0.543048
893	0.660312	0.543306
894	0.660579	0.543537
895	0.660692	0.543651
896	0.660856	0.543837
897	0.660993	0.543998
898	0.661085	0.544114
899	0.661325	0.544318
900	0.661494	0.544455
901	0.6616	0.544549
902	0.661659	0.54471
903	0.661768	0.544849
904	0.661899	0.544991
905	0.662031	0.545166
906	0.662127	0.545331
907	0.662191	0.545453
908	0.662219	0.545511
909	0.662349	0.545674
910	0.662505	0.545853
911	0.662673	0.546046
912	0.662778	0.546267
913	0.66295	0.546502
914	0.663143	0.54672
915	0.663293	0.54686
916	0.663352	0.546976
917	0.663495	0.547149
918	0.663819	0.54743
919	0.663934	0.547553
920	0.664125	0.547765
921	0.664399	0.548064
922	0.664581	0.548265
923	0.664739	0.548453
924	0.664891	0.548647
925	0.665073	0.54889
926	0.665296	0.549122
927	0.665522	0.549345
928	0.665731	0.549553
929	0.665938	0.549766
930	0.666127	0.550013
931	0.666295	0.550296
932	0.666431	0.550496
933	0.666597	0.550697
934	0.666784	0.550906
935	0.666988	0.551149
936	0.667118	0.551387
937	0.667229	0.551618
938	0.667355	0.551831
939	0.667461	0.551981
940	0.667507	0.552104
941	0.667479	0.552208
942	0.667608	0.552403
943	0.667631	0.552528
944	0.667586	0.552613
945	0.667621	0.552785
946	0.667635	0.552888
947	0.667623	0.552971
948	0.667563	0.553078
949	0.667536	0.553169
950	0.667509	0.553284
951	0.667469	0.553437
952	0.667346	0.553454
953	0.667286	0.553496
954	0.667296	0.553571
955	0.667407	0.553702
956	0.66748	0.553774
957	0.667561	0.553822
958	0.667734	0.553884
959	0.668014	0.554115
960	0.66825	0.554305
961	0.668363	0.554351
962	0.668541	0.55458
963	0.668587	0.554807
964	0.668474	0.555004
965	0.668032	0.554963
966	0.667726	0.555122
967	0.667543	0.555412
968	0.66753	0.555754
969	0.66759	0.555996
970	0.66783	0.55625
971	0.668386	0.556585
972	0.669371	0.55704
973	0.670558	0.55748
974	0.67192	0.557891
975	0.672985	0.558328
976	0.673754	0.558731
977	0.674293	0.559096
978	0.674658	0.559377
979	0.674967	0.559624
980	0.675304	0.559903
981	0.67575	0.560286
982	0.674641	0.559348
983	0.674836	0.559521
984	0.675025	0.55968
985	0.675161	0.559808
986	0.675307	0.559929
987	0.675487	0.560051
988	0.675654	0.56021
989	0.675783	0.560385
990	0.675842	0.560476
991	0.675889	0.560573
992	0.676	0.560731
993	0.676169	0.560888
994	0.67625	0.560995
995	0.676223	0.561073
996	0.676234	0.561153
997	0.676328	0.561227
998	0.676413	0.561269
999	0.676439	0.561269
1000	0.676443	0.56128
1001	0.676447	0.56134
1002	0.676489	0.561395
1003	0.676622	0.5615
1004	0.67676	0.561641
1005	0.67684	0.561774
1006	0.67688	0.561878
1007	0.676918	0.561935
1008	0.676937	0.561949
1009	0.676926	0.561958
1010	0.67697	0.56201
1011	0.677099	0.562102
1012	0.677202	0.562198
1013	0.677207	0.562293
1014	0.677234	0.562392
1015	0.67738	0.562545
1016	0.677511	0.562683
1017	0.677598	0.562762
1018	0.677679	0.562835
1019	0.677769	0.562879
1020	0.677962	0.563012
1021	0.6782	0.563201
1022	0.678395	0.563338
1023	0.678525	0.563446
1024	0.678614	0.56356
1025	0.678717	0.56366
1026	0.678862	0.563771
1027	0.679024	0.563954
1028	0.679148	0.564122
1029	0.679248	0.564206
1030	0.679361	0.564271
1031	0.679512	0.564369
1032	0.679695	0.564501
1033	0.679787	0.564586
1034	0.679861	0.564668
1035	0.679986	0.56479
1036	0.680121	0.564908
1037	0.680235	0.565024
1038	0.680334	0.565147
1039	0.680431	0.56525
1040	0.68053	0.565319
1041	0.68059	0.565358
1042	0.680625	0.5654
1043	0.680703	0.565444
1044	0.68078	0.565474
1045	0.680832	0.56549
1046	0.680913	0.565558
1047	0.680993	0.565646
1048	0.681032	0.565717
1049	0.681048	0.565757
1050	0.681054	0.56576
1051	0.681074	0.565763
1052	0.681103	0.565763
1053	0.68112	0.565762
1054	0.681138	0.565766
1055	0.681161	0.565766
1056	0.681105	0.565727
1057	0.681003	0.565649
1058	0.680946	0.565604
1059	0.680919	0.565613
1060	0.680921	0.565641
1061	0.680909	0.565658
1062	0.680846	0.565632
1063	0.680758	0.565553
1064	0.680699	0.565473
1065	0.68069	0.565426
1066	0.680678	0.565388
1067	0.680662	0.565354
1068	0.680655	0.565319
1069	0.680652	0.565294
1070	0.68064	0.565268
1071	0.680592	0.565231
1072	0.680538	0.56519
1073	0.680576	0.565197
1074	0.680689	0.565251
1075	0.680775	0.56529
1076	0.680788	0.565281
1077	0.680801	0.565273
1078	0.680823	0.56527
1079	0.680842	0.565281
1080	0.680895	0.565375
1081	0.680954	0.565472
1082	0.680991	0.565501
1083	0.681027	0.565519
1084	0.681136	0.565615
1085	0.681263	0.565731
1086	0.681386	0.565804
1087	0.681504	0.565868
1088	0.681641	0.565932
1089	0.681779	0.566006
1090	0.681879	0.566088
1091	0.681981	0.566179
1092	0.682113	0.566284
1093	0.682286	0.566401
1094	0.682437	0.566509
1095	0.682544	0.566608
1096	0.682661	0.566709
1097	0.682753	0.566781
1098	0.682826	0.566842
1099	0.682897	0.566915
1100	0.68298	0.566997
1101	0.683083	0.567105
1102	0.683182	0.567219
1103	0.683242	0.567287
1104	0.683289	0.567333
1105	0.683339	0.567361
1106	0.683375	0.56737
1107	0.683404	0.567388
1108	0.683454	0.567427
1109	0.683494	0.567467
1110	0.683491	0.56749
1111	0.683499	0.567506
1112	0.68353	0.567518
1113	0.683556	0.567534
1114	0.683558	0.567538
1115	0.683558	0.567536
1116	0.683536	0.567525
1117	0.683509	0.567511
1118	0.683502	0.567475
1119	0.683501	0.567445
1120	0.683464	0.567402
1121	0.683424	0.567344
1122	0.683378	0.567282
1123	0.683311	0.567224
1124	0.683263	0.567171
1125	0.683242	0.567135
1126	0.683209	0.567099
1127	0.683169	0.567036
1128	0.683133	0.566979
1129	0.683088	0.566941
1130	0.683042	0.566902
1131	0.682996	0.566802
1132	0.682947	0.566692
1133	0.682883	0.566593
1134	0.682825	0.566502
1135	0.682753	0.566421
1136	0.68269	0.566354
1137	0.682649	0.566318
1138	0.682617	0.566292
1139	0.682588	0.566262
1140	0.682556	0.566227
1141	0.682513	0.566173
1142	0.682452	0.566093
1143	0.682403	0.566021
1144	0.682387	0.565972
1145	0.682365	0.565926
1146	0.682336	0.565888
1147	0.682314	0.565854
1148	0.682363	0.565896
1149	0.682414	0.565945
1150	0.682469	0.565947
1151	0.682529	0.565938
1152	0.682595	0.565973
1153	0.682664	0.566021
1154	0.682682	0.566046
1155	0.68266	0.566056
1156	0.682667	0.566079
1157	0.682713	0.566123
1158	0.682759	0.566149
1159	0.682808	0.566139
1160	0.682853	0.566128
1161	0.682871	0.566117
1162	0.682895	0.566114
1163	0.682995	0.566175
1164	0.683092	0.566236
1165	0.683143	0.566301
1166	0.683189	0.566364
1167	0.683253	0.566414
1168	0.683321	0.566463
1169	0.683363	0.566487
1170	0.683398	0.566504
1171	0.683429	0.566516
1172	0.683449	0.566519
1173	0.683503	0.566531
1174	0.683592	0.566552
1175	0.683675	0.566583
1176	0.683753	0.566633
1177	0.68382	0.566678
1178	0.683853	0.566706
1179	0.683879	0.566726
1180	0.68387	0.566717
1181	0.683863	0.56671
1182	0.683897	0.566719
1183	0.683931	0.566728
1184	0.683945	0.566742
1185	0.683955	0.566755
1186	0.683987	0.566765
1187	0.684026	0.566776
1188	0.683997	0.566776
1189	0.68394	0.566775
1190	0.683886	0.566761
1191	0.68383	0.56674
1192	0.683804	0.566739
1193	0.683819	0.56676
1194	0.68382	0.566762
1195	0.683792	0.566734
1196	0.683761	0.566709
1197	0.68372	0.566691
1198	0.683682	0.566671
1199	0.68366	0.566632
1200	0.683638	0.566595
1201	0.683589	0.566584
1202	0.683539	0.566573
1203	0.683513	0.566562
1204	0.683491	0.566551
1205	0.683419	0.566519
1206	0.683335	0.566481
1207	0.683253	0.566422
1208	0.683174	0.566356
1209	0.683122	0.56632
1210	0.683089	0.566306
1211	0.683016	0.566263
1212	0.6829	0.566189
1213	0.682784	0.566113
1214	0.682667	0.566033
1215	0.682548	0.565956
1216	0.682428	0.565891
1217	0.682306	0.565826
1218	0.682166	0.565749
1219	0.682022	0.565671
1220	0.681839	0.565589
1221	0.681656	0.565507
1222	0.681446	0.565412
1223	0.681235	0.565316
1224	0.681003	0.565232
1225	0.68077	0.565149
1226	0.680492	0.565039
1227	0.6802	0.564921
1228	0.67991	0.564817
1229	0.679622	0.564721
1230	0.679325	0.564611
1231	0.679019	0.564489
1232	0.678724	0.564372
1233	0.678444	0.56426
1234	0.678182	0.564149
1235	0.677951	0.564039
1236	0.677741	0.563935
1237	0.677592	0.56385
1238	0.677452	0.563772
1239	0.67736	0.563737
1240	0.677275	0.563702
1241	0.677304	0.563685
1242	0.677334	0.563668
1243	0.677433	0.563691
1244	0.677536	0.563717
1245	0.677673	0.563747
1246	0.677816	0.563777
1247	0.677992	0.563834
1248	0.678178	0.563899
1249	0.678369	0.563927
1250	0.678563	0.563936
1251	0.678746	0.563966
1252	0.678921	0.564012
1253	0.679098	0.564067
1254	0.679278	0.564132
1255	0.679442	0.56419
1256	0.67958	0.564237
1257	0.679721	0.564279
1258	0.679872	0.564311
1259	0.680018	0.564343
1260	0.680142	0.564372
1261	0.680265	0.564402
1262	0.680394	0.564433
1263	0.680523	0.564464
1264	0.680615	0.564499
1265	0.680706	0.564534
1266	0.680762	0.564546
1267	0.680813	0.564556
1268	0.680851	0.564586
1269	0.680884	0.564621
1270	0.680874	0.56462
1271	0.680848	0.564605
1272	0.680823	0.564595
1273	0.680799	0.564587
1274	0.680755	0.564578
1275	0.680694	0.564569
1276	0.680597	0.564542
1277	0.680456	0.564492
1278	0.680303	0.564446
1279	0.680129	0.564406
1280	0.679936	0.56436
1281	0.679688	0.564296
1282	0.679425	0.564228
1283	0.679096	0.564142
1284	0.678761	0.564056
1285	0.678392	0.563962
1286	0.678019	0.563867
1287	0.677559	0.563731
1288	0.677096	0.563594
1289	0.67662	0.563474
1290	0.67614	0.563355
1291	0.675686	0.563241
1292	0.675235	0.563128
1293	0.674796	0.563004
1294	0.674359	0.562874
1295	0.673926	0.562727
1296	0.673495	0.562571
1297	0.673064	0.562418
1298	0.672631	0.562266
1299	0.672191	0.562109
1300	0.671743	0.561947
1301	0.671302	0.561791
1302	0.67087	0.561645
1303	0.670436	0.561504
1304	0.670002	0.561372
1305	0.669573	0.561234
1306	0.669163	0.561078
1307	0.66877	0.560927
1308	0.668456	0.560805
1309	0.668145	0.560684
1310	0.667865	0.560577
1311	0.667586	0.56047
1312	0.667367	0.560363
1313	0.667149	0.560255
1314	0.666994	0.560193
1315	0.666846	0.560135
1316	0.666648	0.560067
1317	0.666439	0.559996
1318	0.666191	0.559915
1319	0.66593	0.559831
1320	0.665619	0.559735
1321	0.665286	0.559634
1322	0.664981	0.559555
1323	0.664693	0.559491
1324	0.664386	0.559408
1325	0.664064	0.55931
1326	0.663752	0.559227
1327	0.663452	0.55916
1328	0.663172	0.559108
1329	0.662927	0.559079
1330	0.662699	0.55904
1331	0.662512	0.558976
1332	0.662333	0.558927
1333	0.662179	0.55893
1334	0.662029	0.558931
1335	0.661895	0.558929
1336	0.661765	0.558929
1337	0.661687	0.558942
1338	0.661608	0.558956
1339	0.661483	0.558976
1340	0.661359	0.558995
1341	0.661096	0.558934
1342	0.660824	0.558867
1343	0.660353	0.558793
1344	0.659851	0.558719
1345	0.65903	0.558581
1346	0.658127	0.558425
1347	0.656988	0.558211
1348	0.655761	0.557974
1349	0.654284	0.557675
1350	0.652675	0.557342
1351	0.651015	0.556995
1352	0.649323	0.556637
1353	0.647642	0.556261
1354	0.645974	0.555867
1355	0.644492	0.555505
1356	0.643248	0.555185
1357	0.642156	0.554892
1358	0.641315	0.554644
1359	0.640619	0.554418
1360	0.64025	0.554238
1361	0.639955	0.554062
1362	0.639897	0.553893
1363	0.639864	0.553727
1364	0.639955	0.553566
1365	0.640034	0.553401
1366	0.640021	0.553174
1367	0.640001	0.552948
1368	0.639675	0.552595
1369	0.639353	0.552247
1370	0.638575	0.551745
1371	0.637789	0.551242
1372	0.636534	0.550556
1373	0.63524	0.549855
1374	0.633339	0.548868
1375	0.631332	0.54783
1376	0.628971	0.54661
1377	0.626517	0.545342
1378	0.62358	0.543732
1379	0.620456	0.541989
1380	0.617012	0.540003
1381	0.613402	0.537887
1382	0.609324	0.535423
1383	0.604923	0.532718
1384	0.60027	0.529826
1385	0.595397	0.52677
1386	0.590178	0.523479
1387	0.58456	0.519918
1388	0.578991	0.516333
1389	0.573476	0.512699
1390	0.56811	0.509066
1391	0.562994	0.505414
1392	0.55826	0.5019
1393	0.554435	0.498692
1394	0.550919	0.495582
1395	0.548418	0.492764
1396	0.546199	0.490082
1397	0.545337	0.488014
1398	0.544621	0.486022
1399	0.545072	0.484584
1400	0.545566	0.483188
1401	0.546872	0.482479
1402	0.548173	0.481772
1403	0.549641	0.481579
1404	0.551106	0.481389
1405	0.551699	0.481454
1406	0.552235	0.481535
1407	0.55164	0.481707
1408	0.550897	0.48189
1409	0.549925	0.482352
1410	0.548905	0.482871
1411	0.548231	0.483736
1412	0.547658	0.484702
1413	0.548047	0.486016
1414	0.548808	0.487465
1415	0.551802	0.489628
1416	0.55591	0.492149
1417	0.562064	0.495218
1418	0.569504	0.498632
1419	0.578043	0.502301
1420	0.587444	0.506171
1421	0.596733	0.5099
1422	0.605921	0.513497
1423	0.614912	0.516985
1424	0.623673	0.520347
1425	0.6315	0.523369
1426	0.637968	0.525894
1427	0.643704	0.52818
1428	0.648124	0.530036
1429	0.652063	0.531731
1430	0.65491	0.533058
1431	0.657585	0.534333
1432	0.65975	0.535454
1433	0.661799	0.536529
1434	0.663396	0.537424
1435	0.664941	0.538302
1436	0.666204	0.539079
1437	0.667434	0.539843
1438	0.668387	0.540493
1439	0.669331	0.541141
1440	0.670105	0.541727
1441	0.670877	0.542312
1442	0.671462	0.542759
1443	0.672049	0.543208
1444	0.672518	0.543596
1445	0.672988	0.543985
1446	0.673384	0.544326
1447	0.673777	0.544664
1448	0.674142	0.544964
1449	0.674504	0.54526
1450	0.674857	0.545524
1451	0.675211	0.545784
1452	0.675546	0.546027
1453	0.675878	0.546267
1454	0.676217	0.546504
1455	0.676558	0.546741
1456	0.676884	0.546957
1457	0.677205	0.547163
1458	0.677514	0.547362
1459	0.677818	0.547556
1460	0.678077	0.54773
1461	0.678312	0.547893
1462	0.67853	0.548069
1463	0.678737	0.548254
1464	0.678947	0.54844
1465	0.67916	0.548624
1466	0.67937	0.548819
1467	0.679578	0.549022
1468	0.679795	0.549233
1469	0.680024	0.549453
1470	0.680246	0.54968
1471	0.68046	0.549915
1472	0.680698	0.550169
1473	0.680973	0.55045
1474	0.681228	0.55072
1475	0.681446	0.55097
1476	0.68168	0.551241
1477	0.681948	0.551553
1478	0.682203	0.551853
1479	0.682422	0.55212
1480	0.682644	0.552399
1481	0.682869	0.55271
1482	0.683096	0.553021
1483	0.683324	0.553323
1484	0.68355	0.553629
1485	0.683776	0.553951
1486	0.684007	0.554275
1487	0.684252	0.55461
1488	0.684495	0.554946
1489	0.684727	0.555272
1490	0.684959	0.555596
1491	0.685193	0.555917
1492	0.685428	0.55624
1493	0.685655	0.556567
1494	0.685882	0.556894
1495	0.686077	0.557209
1496	0.686273	0.557525
1497	0.686476	0.557824
1498	0.68668	0.558123
1499	0.686898	0.558433
1500	0.68712	0.558748
1501	0.687343	0.559032
1502	0.687566	0.559314
1503	0.687758	0.559582
1504	0.687946	0.55985
1505	0.688161	0.56012
1506	0.688383	0.560391
1507	0.688624	0.560652
1508	0.688869	0.560912
1509	0.689108	0.561176
1510	0.689345	0.561443
1511	0.689551	0.561671
1512	0.689749	0.561888
1513	0.68996	0.562117
1514	0.690174	0.56235
1515	0.690361	0.562556
1516	0.690539	0.562756
1517	0.690718	0.562945
1518	0.690898	0.563128
1519	0.691091	0.563324
1520	0.69129	0.563526
1521	0.691457	0.563698
1522	0.691609	0.563853
1523	0.691774	0.563999
1524	0.691947	0.564138
1525	0.692112	0.564257
1526	0.692273	0.564365
1527	0.692433	0.564487
1528	0.692592	0.56462
1529	0.692758	0.564732
1530	0.692932	0.564828
1531	0.69308	0.564926
1532	0.693209	0.565029
1533	0.693337	0.565122
1534	0.693458	0.565202
1535	0.693568	0.565275
1536	0.693674	0.565345
1537	0.693803	0.565415
1538	0.693952	0.565482
1539	0.694066	0.565543
1540	0.694141	0.565596
1541	0.694221	0.565636
1542	0.694306	0.565663
1543	0.694386	0.56568
1544	0.694459	0.565681
1545	0.694519	0.565675
1546	0.694555	0.565657
1547	0.694606	0.565651
1548	0.694683	0.565669
1549	0.694755	0.565682
1550	0.694815	0.565677
1551	0.694874	0.565668
1552	0.694931	0.565655
1553	0.694983	0.565635
1554	0.69503	0.565607
1555	0.695089	0.565595
1556	0.695169	0.56561
1557	0.695233	0.565616
1558	0.695275	0.565612
1559	0.695321	0.565616
1560	0.695363	0.565624
1561	0.695403	0.565626
1562	0.695458	0.565624
1563	0.695521	0.565632
1564	0.695587	0.565655
1565	0.695645	0.565683
1566	0.695691	0.565721
1567	0.695749	0.565762
1568	0.695841	0.565814
1569	0.695924	0.565857
1570	0.695977	0.56587
1571	0.696033	0.565885
1572	0.696097	0.565903
1573	0.696158	0.565921
1574	0.696209	0.565942
1575	0.696261	0.56596
1576	0.696317	0.565962
1577	0.696369	0.565967
1578	0.696409	0.565982
1579	0.696456	0.565999
1580	0.696519	0.566021
1581	0.696577	0.56604
1582	0.696638	0.566053
1583	0.696698	0.566068
1584	0.696745	0.56609
1585	0.696794	0.566116
1586	0.696845	0.566153
1587	0.69689	0.566186
1588	0.696902	0.566181
1589	0.696917	0.566176
1590	0.696963	0.566202
1591	0.697008	0.566231
1592	0.697051	0.566283
1593	0.697097	0.566335
1594	0.697135	0.566368
1595	0.69717	0.566398
1596	0.697209	0.566432
1597	0.697255	0.566471
1598	0.697305	0.566526
1599	0.697346	0.566573
1600	0.697358	0.566609
1601	0.697372	0.566649
1602	0.697401	0.566689
1603	0.697435	0.566733
1604	0.697471	0.566792
1605	0.6975	0.566849
1606	0.697494	0.566886
1607	0.697491	0.566925
1608	0.697512	0.56697
1609	0.697526	0.567012
1610	0.697495	0.567049
1611	0.697469	0.567093
1612	0.697483	0.567163
1613	0.697503	0.567235
1614	0.697561	0.567317
1615	0.69762	0.567396
1616	0.697679	0.567468
1617	0.697734	0.567547
1618	0.697784	0.567644
1619	0.697833	0.567734
1620	0.697848	0.567803
1621	0.697861	0.567873
1622	0.697834	0.567911
1623	0.697824	0.567958
1624	0.697928	0.568072
1625	0.698024	0.568183
1626	0.698053	0.568272
1627	0.698079	0.568365
1628	0.698097	0.568467
1629	0.698122	0.568571
1630	0.698176	0.56868
1631	0.698218	0.568785
1632	0.698221	0.568872
1633	0.698229	0.568961
1634	0.698272	0.569059
1635	0.698314	0.569156
1636	0.698341	0.569262
1637	0.698372	0.56937
1638	0.698426	0.569475
1639	0.698473	0.569584
1640	0.6985	0.56969
1641	0.698536	0.569801
1642	0.698611	0.569947
1643	0.698686	0.570091
1644	0.698735	0.570217
1645	0.69878	0.570338
1646	0.698835	0.570447
1647	0.698888	0.570557
1648	0.698949	0.570679
1649	0.699017	0.570803
1650	0.699072	0.570909
1651	0.699131	0.571025
1652	0.699198	0.571174
1653	0.699259	0.571319
1654	0.69932	0.571448
1655	0.699379	0.571571
1656	0.699419	0.571679
1657	0.699472	0.571802
1658	0.699555	0.57196
1659	0.699629	0.572108
1660	0.699685	0.572222
1661	0.699739	0.572331
1662	0.699788	0.572433
1663	0.699842	0.572546
1664	0.699896	0.572676
1665	0.699948	0.572798
1666	0.700003	0.572903
1667	0.700064	0.573011
1668	0.700131	0.573121
1669	0.700198	0.573242
1670	0.700269	0.573384
1671	0.700336	0.573514
1672	0.700401	0.573625
1673	0.700478	0.573747
1674	0.700571	0.573884
1675	0.700637	0.574009
1676	0.70067	0.574116
1677	0.700726	0.574218
1678	0.700806	0.574315
1679	0.70087	0.574428
1680	0.700916	0.574554
1681	0.700958	0.574653
1682	0.700993	0.574721
1683	0.70104	0.574806
1684	0.701099	0.574909
1685	0.70116	0.575013
1686	0.701229	0.575123
1687	0.701285	0.575227
1688	0.701323	0.575322
1689	0.701367	0.575418
1690	0.701421	0.575519
1691	0.701461	0.575597
1692	0.701488	0.575658
1693	0.701526	0.575729
1694	0.701567	0.57581
1695	0.701629	0.5759
1696	0.701705	0.575995
1697	0.701697	0.576024
1698	0.701647	0.576022
1699	0.701678	0.576081
1700	0.701745	0.576167
1701	0.701793	0.576233
1702	0.70183	0.576288
1703	0.701847	0.576365
1704	0.701859	0.576451
1705	0.701875	0.576551
1706	0.701894	0.576658
1707	0.701925	0.576737
1708	0.701957	0.576806
1709	0.70196	0.576859
1710	0.701959	0.57691
1711	0.701969	0.576918
1712	0.701979	0.576916
1713	0.701949	0.576918
1714	0.701915	0.576921
1715	0.701875	0.576926
1716	0.701831	0.576931
1717	0.701763	0.576936
1718	0.701693	0.576944
1719	0.701567	0.576909
1720	0.701438	0.57687
1721	0.701384	0.576855
1722	0.70133	0.576841
1723	0.701264	0.57683
1724	0.701195	0.576816
1725	0.701121	0.576772
1726	0.701048	0.57673
1727	0.700985	0.576711
1728	0.700912	0.57669
1729	0.700765	0.576671
1730	0.700627	0.576648
1731	0.700549	0.576596
1732	0.700458	0.576548
1733	0.700303	0.576519
1734	0.700148	0.576473
1735	0.699999	0.576362
1736	0.699845	0.576258
1737	0.699671	0.576179
1738	0.699517	0.576104
1739	0.699421	0.576043
1740	0.699313	0.575969
1741	0.699178	0.575867
1742	0.699038	0.575776
1743	0.698894	0.575711
1744	0.698736	0.575614
1745	0.698561	0.575464
1746	0.698397	0.575316
1747	0.69825	0.575172
1748	0.698104	0.575042
1749	0.69796	0.574929
1750	0.697816	0.574812
1751	0.69767	0.574692
1752	0.697537	0.574583
1753	0.697415	0.574485
1754	0.697263	0.574394
1755	0.697089	0.574308
1756	0.696912	0.574203
1757	0.696732	0.574085
1758	0.696529	0.573963
1759	0.696311	0.573838
1760	0.696098	0.57374
1761	0.695885	0.573654
1762	0.695686	0.573553
1763	0.69549	0.573445
1764	0.695305	0.573371
1765	0.695122	0.573306
1766	0.694918	0.573188
1767	0.694709	0.573058
1768	0.694437	0.572913
1769	0.694153	0.572761
1770	0.693872	0.57264
1771	0.693588	0.572522
1772	0.693331	0.572432
1773	0.693076	0.572342
1774	0.692802	0.572202
1775	0.69252	0.572058
1776	0.692214	0.571909
1777	0.691904	0.571762
1778	0.691562	0.571631
1779	0.691203	0.571499
1780	0.690792	0.571389
1781	0.690396	0.571284
1782	0.691846	0.571639
1783	0.691557	0.57159
1784	0.69118	0.571515
1785	0.69079	0.57144
1786	0.690484	0.57138
1787	0.690237	0.571342
1788	0.689998	0.571297
1789	0.689729	0.571227
1790	0.689456	0.571164
1791	0.689209	0.571108
1792	0.68897	0.571051
1793	0.688745	0.570954
1794	0.68853	0.570853
1795	0.688438	0.570813
1796	0.688366	0.570801
1797	0.688302	0.570785
1798	0.68827	0.570779
1799	0.688247	0.570782
1800	0.688207	0.570764
1801	0.688164	0.570742
1802	0.688169	0.570742
1803	0.688184	0.57076
1804	0.688239	0.570871
1805	0.688296	0.570993
1806	0.688328	0.571041
1807	0.688363	0.57107
1808	0.688341	0.571058
1809	0.688264	0.571019
1810	0.688193	0.571013
1811	0.688144	0.571057
1812	0.688105	0.571084
1813	0.688053	0.571081
1814	0.688003	0.57108
1815	0.687983	0.571098
1816	0.687966	0.571116
1817	0.687995	0.571134
1818	0.688046	0.571152
1819	0.688146	0.571161
1820	0.688277	0.571157
1821	0.688429	0.571148
1822	0.688619	0.571122
1823	0.688806	0.571097
1824	0.689051	0.571097
1825	0.689303	0.571097
1826	0.689528	0.571051
1827	0.689746	0.570994
1828	0.689954	0.570963
1829	0.69018	0.570944
1830	0.690371	0.570901
1831	0.690525	0.570838
1832	0.690655	0.570782
1833	0.690756	0.570736
1834	0.690845	0.570689
1835	0.690851	0.57062
1836	0.690852	0.57055
1837	0.690873	0.570506
1838	0.69088	0.570467
1839	0.690926	0.570415
1840	0.690977	0.570367
1841	0.691083	0.570322
1842	0.691215	0.570258
1843	0.691383	0.570191
1844	0.691676	0.570122
1845	0.691978	0.570052
1846	0.692344	0.569992
1847	0.692711	0.56993
1848	0.693088	0.569818
1849	0.693494	0.569707
1850	0.693908	0.569603
1851	0.694316	0.569483
1852	0.694686	0.569334
1853	0.695071	0.569194
1854	0.695403	0.569026
1855	0.6956	0.568766
1856	0.695776	0.568503
1857	0.695847	0.568185
1858	0.695907	0.567861
1859	0.695878	0.567512
1860	0.695832	0.567167
1861	0.695726	0.566792
1862	0.695588	0.566393
1863	0.695426	0.565968
1864	0.695231	0.565533
1865	0.695017	0.565089
1866	0.694759	0.564597
1867	0.694482	0.564091
1868	0.694121	0.563549
1869	0.693755	0.563004
1870	0.693336	0.562398
1871	0.692908	0.561782
1872	0.692469	0.561142
1873	0.692025	0.560503
1874	0.691557	0.559829
1875	0.691069	0.559124
1876	0.690563	0.558413
1877	0.690016	0.557677
1878	0.689438	0.556907
1879	0.688764	0.556046
1880	0.688094	0.555192
1881	0.687418	0.554318
1882	0.686742	0.55344
1883	0.686005	0.552465
1884	0.685253	0.551475
1885	0.684416	0.550417
1886	0.683531	0.549314
1887	0.682617	0.548175
1888	0.681667	0.546985
1889	0.680717	0.54579
1890	0.679732	0.544555
1891	0.678731	0.543303
1892	0.677609	0.541925
1893	0.676478	0.540539
1894	0.675313	0.539165
1895	0.674143	0.537786
1896	0.67298	0.53641
1897	0.671795	0.535008
1898	0.670646	0.533671
1899	0.669512	0.532375
1900	0.668401	0.531129
1901	0.667344	0.529971
1902	0.666313	0.528855
1903	0.665324	0.527908
1904	0.66434	0.526971
1905	0.663492	0.526203
1906	0.662663	0.525452
1907	0.662027	0.524898
1908	0.661436	0.524395
1909	0.660869	0.524014
1910	0.66033	0.523709
1911	0.659851	0.523466
1912	0.659451	0.523336
1913	0.659088	0.523251
1914	0.65884	0.52331
1915	0.658589	0.523368
1916	0.65833	0.523478
1917	0.658074	0.52359
1918	0.657927	0.523733
1919	0.657792	0.52388
1920	0.657643	0.524028
1921	0.657503	0.524185
1922	0.657374	0.524355
1923	0.657252	0.524542
1924	0.657131	0.524722
1925	0.657015	0.524888
1926	0.656897	0.525048
1927	0.656775	0.525185
1928	0.656654	0.525319
1929	0.656512	0.525431
1930	0.656369	0.525541
1931	0.656211	0.525651
1932	0.656054	0.525763
1933	0.655925	0.525834
1934	0.655796	0.525881
1935	0.655684	0.525901
1936	0.655595	0.525908
1937	0.65551	0.525928
1938	0.655424	0.525958
1939	0.655356	0.525985
1940	0.655343	0.525998
1941	0.65533	0.52601
1942	0.65535	0.52605
1943	0.655374	0.526091
1944	0.655438	0.526101
1945	0.655513	0.526108
1946	0.655606	0.526113
1947	0.655701	0.526112
1948	0.655774	0.5261
1949	0.655831	0.526078
1950	0.655932	0.526101
1951	0.656107	0.526195
1952	0.656282	0.526288
1953	0.656465	0.526376
1954	0.656647	0.526468
1955	0.656807	0.52659
1956	0.656965	0.526711
1957	0.657143	0.526841
1958	0.657322	0.526975
1959	0.657521	0.527137
1960	0.657727	0.527308
1961	0.657933	0.527492
1962	0.658149	0.527698
1963	0.658351	0.527896
1964	0.65853	0.528072
1965	0.658719	0.528253
1966	0.65894	0.528456
1967	0.65916	0.528657
1968	0.659396	0.528845
1969	0.659631	0.529033
1970	0.659834	0.529199
1971	0.660034	0.529364
1972	0.660253	0.529553
1973	0.660475	0.52975
1974	0.660704	0.529965
1975	0.660944	0.53019
1976	0.661188	0.530396
1977	0.661433	0.530579
1978	0.661693	0.530778
1979	0.661991	0.531018
1980	0.662279	0.531256
1981	0.662507	0.531464
1982	0.662733	0.531671
1983	0.6629	0.531867
1984	0.663067	0.532064
1985	0.66323	0.532283
1986	0.663392	0.532503
1987	0.663557	0.532742
1988	0.663726	0.532991
1989	0.663897	0.533265
1990	0.664063	0.533555
1991	0.664245	0.533872
1992	0.664453	0.534232
1993	0.664656	0.5346
1994	0.664838	0.534991
1995	0.665025	0.535386
1996	0.665262	0.535833
1997	0.665501	0.536281
1998	0.665784	0.536753
1999	0.666069	0.537227
2000	0.666315	0.537702
2001	0.666552	0.538178
2002	0.666799	0.538653
2003	0.66705	0.539127
2004	0.667332	0.539636
2005	0.667644	0.540178
2006	0.667939	0.540722
2007	0.668207	0.541272
2008	0.668478	0.541832
2009	0.668763	0.542422
2010	0.669047	0.54301
2011	0.669326	0.543571
2012	0.669605	0.544133
2013	0.669824	0.544672
2014	0.670039	0.54521
2015	0.670271	0.545798
2016	0.670507	0.546399
2017	0.670714	0.546982
2018	0.670904	0.547556
2019	0.67111	0.548131
2020	0.671331	0.548707
2021	0.671548	0.549301
2022	0.671756	0.549919
2023	0.671965	0.550535
2024	0.672174	0.551139
2025	0.672381	0.551744
2026	0.672565	0.552349
2027	0.67275	0.552957
2028	0.67295	0.553537
2029	0.673151	0.554119
2030	0.673294	0.554685
2031	0.673424	0.555248
2032	0.673569	0.555796
2033	0.673719	0.556337
2034	0.673837	0.556864
2035	0.673927	0.557379
2036	0.67401	0.557889
2037	0.674083	0.558388
2038	0.674166	0.558892
2039	0.674276	0.559405
2040	0.674378	0.559908
2041	0.674438	0.560357
2042	0.674497	0.560808
2043	0.674499	0.561284
2044	0.674502	0.561762
2045	0.67451	0.562228
2046	0.67452	0.562693
2047	0.674506	0.563106
2048	0.674485	0.563503
2049	0.674434	0.563891
2050	0.674368	0.564275
2051	0.674281	0.564665
2052	0.674174	0.565059
2053	0.674066	0.565417
2054	0.673953	0.565713
2055	0.673819	0.56601
2056	0.673626	0.566308
2057	0.673423	0.566597
2058	0.673153	0.566808
2059	0.672882	0.567019
2060	0.67255	0.567217
2061	0.672215	0.567415
2062	0.671801	0.56758
2063	0.671378	0.567742
2064	0.6709	0.567914
2065	0.670405	0.568088
2066	0.669905	0.568237
2067	0.669401	0.568374
2068	0.668865	0.568479
2069	0.668302	0.568553
2070	0.667736	0.568605
2071	0.66717	0.568625
2072	0.666604	0.568647
2073	0.666028	0.568673
2074	0.665451	0.568692
2075	0.664868	0.568672
2076	0.664285	0.568649
2077	0.663691	0.568594
2078	0.663094	0.568539
2079	0.662418	0.568471
2080	0.661729	0.568398
2081	0.66105	0.568276
2082	0.660375	0.568141
2083	0.659671	0.56796
2084	0.658957	0.567761
2085	0.658261	0.567575
2086	0.657592	0.567398
2087	0.656991	0.567208
2088	0.656477	0.567008
2089	0.656001	0.566805
2090	0.655604	0.566603
2091	0.655235	0.566412
2092	0.654955	0.566246
2093	0.654683	0.566074
2094	0.65443	0.56585
2095	0.654178	0.565627
2096	0.653877	0.56541
2097	0.653569	0.565191
2098	0.653166	0.564952
2099	0.652736	0.564708
2100	0.652194	0.564408
2101	0.651615	0.564093
2102	0.650852	0.563794
2103	0.649983	0.563497
2104	0.648985	0.563159
2105	0.647895	0.562797
2106	0.646706	0.56243
2107	0.64542	0.562061
2108	0.644134	0.561709
2109	0.642898	0.561404
2110	0.641659	0.561103
2111	0.640483	0.560835
2112	0.63933	0.560578
2113	0.638412	0.560377
2114	0.637504	0.560181
2115	0.636799	0.560067
2116	0.636095	0.559954
2117	0.635601	0.559903
2118	0.635116	0.559857
2119	0.634688	0.559832
2120	0.634248	0.559802
2121	0.63376	0.559743
2122	0.633233	0.559668
2123	0.632606	0.559591
2124	0.631896	0.559499
2125	0.631087	0.559326
2126	0.630169	0.559079
2127	0.629089	0.558786
2128	0.627767	0.558417
2129	0.626359	0.558001
2130	0.624753	0.557491
2131	0.623035	0.556929
2132	0.620862	0.556154
2133	0.61864	0.555356
2134	0.616134	0.554426
2135	0.613587	0.55348
2136	0.610404	0.55227
2137	0.607177	0.551042
2138	0.60353	0.549658
2139	0.599829	0.548247
2140	0.59557	0.546537
2141	0.591191	0.544764
2142	0.586534	0.542843
2143	0.581786	0.540867
2144	0.5766	0.538621
2145	0.571178	0.536215
2146	0.56574	0.533756
2147	0.560342	0.531252
2148	0.554866	0.528603
2149	0.549371	0.525796
2150	0.543989	0.522947
2151	0.538908	0.520054
2152	0.533853	0.517069
2153	0.528991	0.513856
2154	0.524246	0.510622
2155	0.520144	0.507385
2156	0.516076	0.504117
2157	0.51261	0.500722
2158	0.509175	0.497313
2159	0.506467	0.493994
2160	0.503789	0.490669
2161	0.501648	0.487188
2162	0.499542	0.483683
2163	0.498045	0.480395
2164	0.496651	0.477156
2165	0.495614	0.473963
2166	0.494682	0.470785
2167	0.494073	0.467809
2168	0.493599	0.464949
2169	0.493282	0.462144
2170	0.493047	0.459391
2171	0.492884	0.456821
2172	0.492766	0.454433
2173	0.492664	0.452151
2174	0.492565	0.450031
2175	0.492485	0.44804
2176	0.492418	0.44629
2177	0.492313	0.444572
2178	0.492035	0.442972
2179	0.491732	0.441427
2180	0.49123	0.440121
2181	0.490706	0.438835
2182	0.489882	0.437705
2183	0.489031	0.436585
2184	0.487911	0.43569
2185	0.486769	0.434804
2186	0.485361	0.434031
2187	0.483926	0.433259
2188	0.482316	0.432617
2189	0.480702	0.431999
2190	0.478939	0.431496
2191	0.477127	0.431012
2192	0.475242	0.430569
2193	0.473303	0.430123
2194	0.471116	0.429667
2195	0.468711	0.429173
2196	0.466004	0.428604
2197	0.462992	0.427941
2198	0.459583	0.427167
2199	0.455754	0.42627
2200	0.451676	0.425269
2201	0.447425	0.424186
2202	0.44305	0.423095
2203	0.438849	0.422125
2204	0.434889	0.42124
2205	0.432179	0.420805
2206	0.429812	0.420501
2207	0.429511	0.420952
2208	0.429612	0.421543
2209	0.432381	0.423063
2210	0.435492	0.424717
2211	0.441458	0.427359
2212	0.447677	0.430091
2213	0.455554	0.433304
2214	0.463517	0.43654
2215	0.472565	0.44005
2216	0.481596	0.443541
2217	0.490189	0.446664
2218	0.498601	0.449692
2219	0.506408	0.452375
2220	0.514003	0.454952
2221	0.520141	0.456859
2222	0.525814	0.458557
2223	0.530433	0.459776
2224	0.534627	0.460794
2225	0.537941	0.461417
2226	0.540801	0.461836
2227	0.543124	0.461991
2228	0.545078	0.461967
2229	0.546554	0.461752
2230	0.547607	0.461363
2231	0.548381	0.460818
2232	0.548862	0.460112
2233	0.549189	0.459366
2234	0.549296	0.458591
2235	0.54928	0.45778
2236	0.549085	0.45694
2237	0.548832	0.456091
2238	0.548487	0.45528
2239	0.548133	0.45448
2240	0.547778	0.453735
2241	0.54741	0.453005
2242	0.547024	0.452424
2243	0.546653	0.451859
2244	0.546409	0.451456
2245	0.546173	0.451067
2246	0.546032	0.450883
2247	0.545893	0.450702
2248	0.545757	0.450602
2249	0.54562	0.450508
2250	0.545508	0.45054
2251	0.545394	0.450577
2252	0.545192	0.450634
2253	0.544971	0.450687
2254	0.544698	0.450752
2255	0.544407	0.450814
2256	0.544057	0.450953
2257	0.543694	0.451112
2258	0.543327	0.451252
2259	0.542966	0.451394
2260	0.542549	0.451517
2261	0.542105	0.451631
2262	0.541645	0.451741
2263	0.541167	0.451848
2264	0.54068	0.451996
2265	0.540185	0.452165
2266	0.539618	0.452277
2267	0.538992	0.452355
2268	0.538314	0.452437
2269	0.537594	0.452523
2270	0.53684	0.452587
2271	0.536046	0.452621
2272	0.53525	0.452678
2273	0.534456	0.452774
2274	0.533621	0.452847
2275	0.532729	0.452878
2276	0.531815	0.452907
2277	0.530879	0.452939
2278	0.529964	0.452968
2279	0.529111	0.452985
2280	0.528253	0.453003
2281	0.527404	0.453019
2282	0.526551	0.453032
2283	0.525717	0.45305
2284	0.524894	0.45305
2285	0.524142	0.45297
2286	0.523383	0.452873
2287	0.522626	0.452683
2288	0.521864	0.452488
2289	0.521138	0.452268
2290	0.520416	0.452042
2291	0.519778	0.451766
2292	0.519124	0.451471
2293	0.518337	0.450961
2294	0.51754	0.450444
2295	0.516815	0.449931
2296	0.516082	0.449409
2297	0.515294	0.448786
2298	0.514493	0.448153
2299	0.513609	0.447406
2300	0.512713	0.446645
2301	0.511679	0.445727
2302	0.510621	0.444784
2303	0.509499	0.443807
2304	0.508358	0.442814
2305	0.507117	0.441725
2306	0.505849	0.440609
2307	0.504673	0.439511
2308	0.503502	0.438406
2309	0.502299	0.437157
2310	0.501079	0.435865
2311	0.500038	0.434686
2312	0.499033	0.433525
2313	0.498068	0.432265
2314	0.497108	0.430967
2315	0.496305	0.429788
2316	0.495548	0.428641
2317	0.494904	0.427386
2318	0.494299	0.426082
2319	0.493889	0.424972
2320	0.493554	0.423935
2321	0.49324	0.422843
2322	0.492936	0.421721
2323	0.492826	0.420668
2324	0.492811	0.419644
2325	0.492848	0.418687
2326	0.492915	0.417754
2327	0.493078	0.416941
2328	0.493301	0.416198
2329	0.493638	0.415537
2330	0.494057	0.41492
2331	0.494485	0.414314
2332	0.494934	0.413718
2333	0.495386	0.413209
2334	0.49585	0.412766
2335	0.496211	0.412397
2336	0.496508	0.41209
2337	0.496628	0.411798
2338	0.496599	0.411511
2339	0.496456	0.411242
2340	0.496208	0.410994
2341	0.495827	0.410753
2342	0.495316	0.410518
2343	0.494726	0.410361
2344	0.494052	0.410283
2345	0.493273	0.410223
2346	0.492355	0.41019
2347	0.491424	0.410164
[truncated: 153 more rows]

## Sheet: Table S9
Table S9. VNIR-SWIR reflectance spectra corresponding to mechanic mixtures of dickite-kaolinite reference minerals from the Athabasca Basin Mineral Standards database
Wavelength	D-K 20:80	D:K 40:60	D-K 80:20
350	0.155185	0.146356	0.120946
351	0.161095	0.150568	0.113234
352	0.15825	0.146902	0.106884
353	0.180895	0.165237	0.140678
354	0.1919	0.178605	0.154808
355	0.199001	0.189263	0.158059
356	0.210912	0.198636	0.156166
357	0.227724	0.21285	0.173383
358	0.240427	0.221453	0.190973
359	0.244338	0.218836	0.201325
360	0.254245	0.229618	0.195795
361	0.263559	0.239666	0.192931
362	0.271399	0.24755	0.194237
363	0.271872	0.247449	0.203013
364	0.275149	0.250803	0.211616
365	0.281957	0.258677	0.220229
366	0.296991	0.277351	0.229409
367	0.295589	0.274172	0.223275
368	0.294061	0.266984	0.220733
369	0.301498	0.264561	0.233483
370	0.309783	0.279121	0.242908
371	0.314643	0.289147	0.244239
372	0.315913	0.292327	0.23772
373	0.319374	0.292988	0.240083
374	0.321444	0.292821	0.24605
375	0.321198	0.292063	0.251181
376	0.313762	0.290927	0.241112
377	0.315863	0.292201	0.240787
378	0.321372	0.294395	0.244084
379	0.327335	0.296858	0.248048
380	0.328584	0.298058	0.252485
381	0.329145	0.300067	0.254377
382	0.329739	0.303248	0.253194
383	0.331091	0.305542	0.253573
384	0.33326	0.30513	0.255031
385	0.33579	0.303921	0.257615
386	0.337095	0.309363	0.262678
387	0.339381	0.313496	0.264132
388	0.341329	0.315317	0.263485
389	0.341496	0.31271	0.261218
390	0.34274	0.313169	0.265254
391	0.344918	0.315344	0.269698
392	0.348139	0.31911	0.273146
393	0.347234	0.319485	0.268711
394	0.348738	0.320597	0.268339
395	0.351809	0.322218	0.27134
396	0.351102	0.322423	0.274267
397	0.350616	0.322802	0.274649
398	0.350698	0.323523	0.273908
399	0.352189	0.325084	0.273331
400	0.353658	0.32618	0.275277
401	0.354479	0.326937	0.27723
402	0.354304	0.327358	0.278255
403	0.355223	0.329442	0.278248
404	0.356148	0.330039	0.278051
405	0.356964	0.329192	0.277853
406	0.357219	0.328986	0.279236
407	0.35812	0.329763	0.280566
408	0.359109	0.331063	0.281574
409	0.359137	0.332427	0.281491
410	0.359806	0.332617	0.281454
411	0.360568	0.332712	0.282093
412	0.361173	0.333276	0.283982
413	0.360859	0.334034	0.284008
414	0.36097	0.33448	0.283607
415	0.361651	0.334601	0.283023
416	0.362598	0.335727	0.28452
417	0.363339	0.336389	0.286061
418	0.363856	0.336809	0.28736
419	0.363909	0.337471	0.287357
420	0.364329	0.338149	0.287382
421	0.36466	0.338368	0.287365
422	0.364511	0.337566	0.287231
423	0.365146	0.338459	0.288745
424	0.366038	0.339778	0.290173
425	0.367099	0.341304	0.291177
426	0.367948	0.341876	0.291126
427	0.368517	0.342225	0.291869
428	0.368913	0.342552	0.293156
429	0.369534	0.343821	0.294139
430	0.370124	0.344799	0.294562
431	0.370817	0.345571	0.294842
432	0.371845	0.34612	0.295375
433	0.372883	0.347368	0.297041
434	0.373755	0.348594	0.298717
435	0.374392	0.349598	0.30009
436	0.375272	0.350521	0.300079
437	0.376075	0.351253	0.300369
438	0.376799	0.351852	0.301037
439	0.377514	0.352712	0.302356
440	0.377681	0.3534	0.303193
441	0.377793	0.354042	0.303738
442	0.37862	0.354832	0.304133
443	0.379203	0.355244	0.304673
444	0.379782	0.355815	0.305514
445	0.380464	0.356823	0.306814
446	0.381056	0.357801	0.307259
447	0.381707	0.35841	0.307551
448	0.382401	0.358669	0.307791
449	0.382787	0.358997	0.308588
450	0.383619	0.360029	0.309656
451	0.3845	0.361263	0.31064
452	0.384601	0.361749	0.31071
453	0.385298	0.362254	0.310906
454	0.38608	0.362922	0.311502
455	0.386678	0.363903	0.312816
456	0.386775	0.364047	0.312909
457	0.387175	0.364414	0.313085
458	0.387962	0.365129	0.313508
459	0.388285	0.365631	0.313971
460	0.388591	0.366098	0.314472
461	0.388907	0.366568	0.314934
462	0.389329	0.367179	0.315078
463	0.389859	0.367692	0.315281
464	0.390369	0.368106	0.315507
465	0.390748	0.368379	0.315739
466	0.391484	0.369082	0.316705
467	0.39199	0.369649	0.317287
468	0.392138	0.369958	0.317241
469	0.392388	0.370584	0.31738
470	0.392883	0.370958	0.317813
471	0.393509	0.371203	0.318449
472	0.393812	0.371846	0.318993
473	0.394087	0.372242	0.319163
474	0.394453	0.37258	0.319258
475	0.39511	0.373045	0.319567
476	0.395516	0.373563	0.320306
477	0.395874	0.374107	0.320887
478	0.396237	0.374678	0.32113
479	0.397097	0.375456	0.321722
480	0.397636	0.376009	0.3221
481	0.397931	0.376386	0.322356
482	0.398595	0.376915	0.323226
483	0.399389	0.377728	0.32406
484	0.400132	0.378576	0.324721
485	0.400532	0.379113	0.324902
486	0.401176	0.37966	0.32538
487	0.401838	0.380316	0.326051
488	0.402443	0.381159	0.326937
489	0.403077	0.382	0.327526
490	0.403735	0.382712	0.328015
491	0.404411	0.383312	0.328461
492	0.405048	0.384039	0.329397
493	0.405584	0.38465	0.330092
494	0.406042	0.385203	0.330628
495	0.406431	0.385793	0.331085
496	0.407108	0.386542	0.331753
497	0.407838	0.387312	0.332489
498	0.408511	0.388041	0.333243
499	0.409177	0.388867	0.333986
500	0.409808	0.3896	0.334691
501	0.410406	0.390224	0.335354
502	0.411093	0.390957	0.335997
503	0.411739	0.391686	0.336725
504	0.412373	0.392426	0.337512
505	0.413085	0.393264	0.338352
506	0.413723	0.393977	0.33898
507	0.414317	0.394644	0.339547
508	0.414885	0.395322	0.34016
509	0.415583	0.396133	0.3411
510	0.416251	0.396941	0.341928
511	0.416861	0.39772	0.342552
512	0.417411	0.398301	0.343071
513	0.418125	0.399033	0.343861
514	0.418936	0.399875	0.344838
515	0.419597	0.400711	0.345727
516	0.420236	0.401484	0.346401
517	0.420914	0.402253	0.347057
518	0.421737	0.403101	0.34792
519	0.422449	0.403789	0.348726
520	0.423106	0.404508	0.349513
521	0.423721	0.405323	0.350295
522	0.42434	0.406114	0.350952
523	0.424876	0.40672	0.351532
524	0.425359	0.407201	0.352085
525	0.425997	0.407958	0.352928
526	0.426669	0.408779	0.3537
527	0.427341	0.409583	0.354423
528	0.427972	0.410239	0.355119
529	0.428743	0.410983	0.355974
530	0.429517	0.411773	0.356849
531	0.430249	0.412611	0.357702
532	0.430967	0.413461	0.358487
533	0.431646	0.414243	0.359219
534	0.432296	0.414964	0.359919
535	0.433059	0.415809	0.360842
536	0.433842	0.416727	0.361734
537	0.434658	0.417698	0.362618
538	0.435569	0.418739	0.363556
539	0.436549	0.419756	0.364546
540	0.437554	0.42079	0.365593
541	0.438575	0.421879	0.366727
542	0.439779	0.423158	0.367867
543	0.44087	0.424312	0.368893
544	0.441797	0.425287	0.369781
545	0.442328	0.425909	0.370456
546	0.44279	0.426494	0.371121
547	0.443184	0.427046	0.371756
548	0.443469	0.427552	0.372279
549	0.443812	0.428	0.372744
550	0.444246	0.428511	0.373297
551	0.444842	0.429221	0.374103
552	0.445457	0.430044	0.374958
553	0.446079	0.430825	0.375758
554	0.446709	0.431532	0.376478
555	0.447313	0.432267	0.377213
556	0.447965	0.432979	0.377994
557	0.448646	0.433686	0.378822
558	0.449289	0.434472	0.379755
559	0.44999	0.435327	0.380586
560	0.450718	0.43617	0.381386
561	0.451454	0.436905	0.382222
562	0.452201	0.437742	0.383257
563	0.452939	0.438583	0.384265
564	0.45366	0.439401	0.385174
565	0.454344	0.440186	0.385985
566	0.454951	0.440886	0.386777
567	0.455482	0.441496	0.387553
568	0.455936	0.441932	0.388329
569	0.456324	0.442338	0.38901
570	0.456699	0.442722	0.389639
571	0.457143	0.443085	0.39025
572	0.457633	0.443594	0.390993
573	0.458205	0.444225	0.391836
574	0.458897	0.445002	0.392798
575	0.459752	0.445987	0.393891
576	0.460667	0.447008	0.394969
577	0.461617	0.448039	0.396019
578	0.46239	0.448973	0.397037
579	0.463167	0.449861	0.398052
580	0.463928	0.450708	0.399038
581	0.46462	0.451494	0.399919
582	0.465124	0.452042	0.400648
583	0.465595	0.452543	0.401393
584	0.466111	0.453089	0.402259
585	0.466756	0.453814	0.403135
586	0.467472	0.454646	0.404036
587	0.468255	0.455576	0.404962
588	0.469122	0.45657	0.405904
589	0.470047	0.457616	0.40699
590	0.470977	0.458677	0.408118
591	0.471745	0.459654	0.408982
592	0.472629	0.460664	0.409929
593	0.47353	0.461652	0.4109
594	0.474376	0.46256	0.411855
595	0.475143	0.463498	0.412765
596	0.475919	0.464435	0.413679
597	0.476722	0.465367	0.414609
598	0.477405	0.466186	0.415396
599	0.478054	0.466911	0.41617
600	0.478672	0.467581	0.416938
601	0.479267	0.468359	0.417715
602	0.479824	0.469041	0.418402
603	0.480417	0.469709	0.41908
604	0.481153	0.470454	0.419838
605	0.481841	0.471173	0.420614
606	0.482536	0.471925	0.421388
607	0.483256	0.472737	0.422154
608	0.483891	0.473377	0.422804
609	0.48454	0.474055	0.423467
610	0.485186	0.47476	0.424145
611	0.485655	0.475368	0.424813
612	0.485796	0.475667	0.425128
613	0.485747	0.475755	0.425236
614	0.485603	0.475648	0.425235
615	0.485643	0.47576	0.425417
616	0.485783	0.475963	0.425671
617	0.486012	0.476227	0.425971
618	0.486272	0.476556	0.426284
619	0.486554	0.476879	0.426572
620	0.486853	0.477186	0.426841
621	0.487152	0.477439	0.427195
622	0.487373	0.477711	0.427487
623	0.48756	0.477977	0.427737
624	0.487794	0.47817	0.427964
625	0.487938	0.478322	0.428134
626	0.488079	0.478464	0.428362
627	0.488267	0.47861	0.428741
628	0.48841	0.478806	0.429002
629	0.488609	0.479017	0.429298
630	0.488877	0.479239	0.429646
631	0.48921	0.479516	0.430008
632	0.48945	0.47978	0.430436
633	0.489639	0.48004	0.430893
634	0.489874	0.480321	0.431298
635	0.490172	0.480642	0.431639
636	0.490439	0.480917	0.431931
637	0.490591	0.481063	0.432171
638	0.490847	0.481341	0.432564
639	0.491141	0.481634	0.432927
640	0.491463	0.481924	0.433224
641	0.491805	0.482287	0.433472
642	0.492194	0.482692	0.433816
643	0.492615	0.48313	0.434227
644	0.493045	0.483609	0.434636
645	0.493414	0.484049	0.43501
646	0.493772	0.48446	0.435356
647	0.494175	0.484846	0.435676
648	0.494566	0.485249	0.436083
649	0.494979	0.485681	0.436498
650	0.49543	0.486154	0.436904
651	0.495772	0.486542	0.437236
652	0.496159	0.48691	0.43761
653	0.496581	0.487269	0.438017
654	0.49694	0.487645	0.438405
655	0.497351	0.488074	0.438845
656	0.497751	0.4885	0.439276
657	0.498045	0.488843	0.439599
658	0.498405	0.489222	0.439969
659	0.49878	0.489601	0.44038
660	0.499153	0.489967	0.440842
661	0.499478	0.490353	0.441203
662	0.499859	0.490737	0.441593
663	0.500291	0.491122	0.44202
664	0.500653	0.491568	0.442477
665	0.501056	0.49201	0.442953
666	0.501479	0.49245	0.443427
667	0.501897	0.4929	0.443852
668	0.502312	0.493328	0.44428
669	0.502735	0.493769	0.444741
670	0.503173	0.494251	0.445266
671	0.503593	0.494703	0.445748
672	0.504046	0.495183	0.446227
673	0.504536	0.495697	0.446708
674	0.505002	0.49614	0.447167
675	0.505414	0.496573	0.447654
676	0.505816	0.497022	0.448165
677	0.506347	0.497594	0.448711
678	0.506844	0.498094	0.449202
679	0.507312	0.498566	0.449668
680	0.507743	0.499036	0.450128
681	0.508244	0.499533	0.450716
682	0.508707	0.500026	0.451247
683	0.50911	0.500508	0.45168
684	0.50951	0.500912	0.452131
685	0.509986	0.501368	0.452643
686	0.510501	0.501868	0.453192
687	0.510905	0.502424	0.453697
688	0.511372	0.502938	0.454219
689	0.511858	0.503423	0.454731
690	0.51232	0.503885	0.4552
691	0.512833	0.504444	0.455772
692	0.513328	0.504981	0.456358
693	0.513785	0.505458	0.456937
694	0.514209	0.50591	0.457399
695	0.514659	0.506347	0.457865
696	0.515137	0.506788	0.45835
697	0.515658	0.507364	0.458949
698	0.516147	0.507897	0.459505
699	0.516618	0.508392	0.460032
700	0.517087	0.508838	0.460541
701	0.517563	0.509338	0.461045
702	0.518045	0.509834	0.461574
703	0.518535	0.510299	0.462148
704	0.51908	0.510866	0.462754
705	0.519561	0.511395	0.463292
706	0.519979	0.511876	0.463763
707	0.520455	0.512306	0.464283
708	0.520886	0.512741	0.464806
709	0.521289	0.51318	0.465315
710	0.521685	0.51362	0.465762
711	0.522076	0.514026	0.466196
712	0.522473	0.514427	0.466645
713	0.522884	0.514842	0.467131
714	0.523237	0.515256	0.467578
715	0.523602	0.515673	0.468035
716	0.52399	0.516092	0.468506
717	0.524417	0.51649	0.46892
718	0.524804	0.516874	0.469343
719	0.525176	0.517263	0.469779
720	0.525615	0.517715	0.470255
721	0.526006	0.518116	0.470686
722	0.526374	0.518489	0.471108
723	0.526731	0.518837	0.471549
724	0.527156	0.519255	0.471989
725	0.527529	0.519646	0.472401
726	0.527825	0.519991	0.472776
727	0.528208	0.520348	0.473228
728	0.528607	0.520724	0.473682
729	0.529004	0.521102	0.474122
730	0.529309	0.521402	0.474456
731	0.529588	0.521653	0.474766
732	0.529832	0.521858	0.475067
733	0.530013	0.52199	0.475371
734	0.530203	0.522102	0.475629
735	0.53039	0.522223	0.475878
736	0.53057	0.522363	0.476127
737	0.530789	0.522583	0.476397
738	0.531101	0.522881	0.47671
739	0.531485	0.523238	0.477062
740	0.531807	0.523558	0.477443
741	0.532123	0.523872	0.477799
742	0.532461	0.524196	0.478152
743	0.532878	0.524563	0.478537
744	0.533238	0.524938	0.478864
745	0.533562	0.525284	0.479179
746	0.533848	0.525577	0.479501
747	0.534099	0.525786	0.479812
748	0.534434	0.526089	0.48014
749	0.53485	0.526488	0.480482
750	0.535198	0.526839	0.480776
751	0.535567	0.527208	0.481141
752	0.535963	0.527595	0.481547
753	0.536421	0.528011	0.481957
754	0.536763	0.528352	0.482281
755	0.5371	0.528689	0.4826
756	0.537493	0.529061	0.482962
757	0.537839	0.529354	0.483276
758	0.538212	0.529676	0.48361
759	0.538618	0.530035	0.48397
760	0.538939	0.530301	0.484258
761	0.539306	0.530619	0.484579
762	0.539684	0.530959	0.484907
763	0.539952	0.531224	0.485157
764	0.540185	0.531442	0.485375
765	0.540443	0.531677	0.485596
766	0.540789	0.531992	0.48585
767	0.541137	0.532281	0.486154
768	0.541448	0.53252	0.486429
769	0.541713	0.5327	0.48666
770	0.5419	0.532893	0.486802
771	0.542102	0.533049	0.486949
772	0.542329	0.533187	0.487118
773	0.542643	0.533405	0.487396
774	0.542863	0.533594	0.487552
775	0.543049	0.533749	0.487661
776	0.543247	0.533842	0.48779
777	0.54333	0.533931	0.487884
778	0.543447	0.53404	0.487996
779	0.543648	0.534183	0.488143
780	0.543736	0.534236	0.488177
781	0.543879	0.534334	0.488247
782	0.544067	0.534469	0.488346
783	0.544205	0.53454	0.488399
784	0.544325	0.534565	0.488483
785	0.544422	0.534572	0.488566
786	0.544472	0.534593	0.488596
787	0.544626	0.534681	0.488707
788	0.54474	0.534734	0.488777
789	0.544736	0.534695	0.488743
790	0.544834	0.534719	0.488784
791	0.544958	0.534761	0.488839
792	0.545099	0.534816	0.488902
793	0.545211	0.53483	0.488927
794	0.545283	0.53486	0.488986
795	0.545348	0.5349	0.48905
796	0.545478	0.534948	0.489056
797	0.545607	0.534972	0.489073
798	0.545751	0.535015	0.489134
799	0.545929	0.535109	0.48928
800	0.546112	0.535222	0.489413
801	0.546242	0.535305	0.489474
802	0.546311	0.535347	0.489454
803	0.546383	0.535307	0.489445
804	0.546374	0.535187	0.489424
805	0.54632	0.535039	0.489394
806	0.546316	0.535023	0.489358
807	0.546465	0.535102	0.489387
808	0.546698	0.535254	0.489475
809	0.546998	0.535499	0.489649
810	0.547291	0.535826	0.489875
811	0.547575	0.536122	0.490085
812	0.54785	0.536361	0.490263
813	0.548133	0.536619	0.490409
814	0.548364	0.536784	0.490522
815	0.548548	0.536885	0.49061
816	0.548686	0.537021	0.490695
817	0.548847	0.537134	0.490791
818	0.549004	0.537222	0.490869
819	0.549119	0.537273	0.490887
820	0.549315	0.537394	0.490988
821	0.549509	0.537537	0.491089
822	0.549677	0.537693	0.491167
823	0.549767	0.537774	0.491169
824	0.54987	0.537842	0.491186
825	0.549993	0.537905	0.49123
826	0.550197	0.53798	0.491364
827	0.550374	0.538079	0.491478
828	0.550536	0.538171	0.491562
829	0.550688	0.538202	0.491585
830	0.550795	0.538257	0.491623
831	0.550906	0.538331	0.491684
832	0.551045	0.538427	0.491777
833	0.55116	0.538568	0.491836
834	0.551332	0.538728	0.491923
835	0.551556	0.538899	0.492039
836	0.551703	0.539004	0.492118
837	0.551832	0.53913	0.492231
838	0.551955	0.539267	0.492346
839	0.552096	0.539399	0.49239
840	0.552301	0.539492	0.492454
841	0.552484	0.539569	0.492534
842	0.552587	0.539637	0.492631
843	0.552701	0.539714	0.492728
844	0.552802	0.539798	0.492783
845	0.552888	0.539881	0.49279
846	0.55298	0.539819	0.492813
847	0.553095	0.539862	0.492877
848	0.553216	0.53997	0.492967
849	0.553295	0.540058	0.493061
850	0.553418	0.540099	0.493084
851	0.553553	0.540142	0.493099
852	0.553679	0.540227	0.493151
853	0.553754	0.540323	0.493249
854	0.553835	0.54043	0.493313
855	0.553936	0.540546	0.493323
856	0.553972	0.540505	0.493277
857	0.55405	0.540517	0.493315
858	0.554158	0.540576	0.49341
859	0.554247	0.540677	0.493474
860	0.554326	0.540729	0.49353
861	0.554424	0.540762	0.493586
862	0.554581	0.540801	0.493652
863	0.554713	0.540855	0.493718
864	0.554793	0.540907	0.49377
865	0.554804	0.540951	0.493801
866	0.55492	0.541061	0.493862
867	0.555091	0.541229	0.493966
868	0.555291	0.541428	0.494105
869	0.555366	0.541479	0.494229
870	0.55549	0.541581	0.494306
871	0.555665	0.541718	0.494387
872	0.555926	0.541889	0.494559
873	0.556019	0.541976	0.494686
874	0.556132	0.542064	0.494825
875	0.556347	0.542189	0.495006
876	0.556475	0.542316	0.495105
877	0.556678	0.542477	0.495243
878	0.556949	0.542666	0.495421
879	0.557037	0.542781	0.495561
880	0.557187	0.542974	0.495749
881	0.557385	0.543191	0.495955
882	0.557631	0.543327	0.496117
883	0.557852	0.543494	0.496277
884	0.558088	0.543706	0.496467
885	0.558367	0.543988	0.496716
886	0.558551	0.54417	0.496907
887	0.558775	0.544394	0.497136
888	0.559054	0.544672	0.497408
889	0.559289	0.544867	0.497585
890	0.559424	0.545008	0.497707
891	0.559522	0.545139	0.497816
892	0.559757	0.545385	0.498031
893	0.560034	0.545597	0.498295
894	0.560292	0.545778	0.498522
895	0.560467	0.545915	0.498628
896	0.560655	0.546161	0.498828
897	0.560847	0.546372	0.499015
898	0.561042	0.546516	0.499165
899	0.56121	0.546645	0.499294
900	0.561369	0.546775	0.499447
901	0.561521	0.546912	0.499629
902	0.56167	0.547081	0.499859
903	0.561838	0.547241	0.500045
904	0.562025	0.547396	0.500216
905	0.562238	0.547548	0.500396
906	0.562369	0.547726	0.500561
907	0.56249	0.547885	0.500736
908	0.562619	0.548011	0.500931
909	0.562866	0.548238	0.501171
910	0.563119	0.54844	0.501393
911	0.563372	0.548621	0.501601
912	0.563589	0.548836	0.501831
913	0.563844	0.54914	0.502124
914	0.564094	0.549448	0.502413
915	0.564267	0.549624	0.502585
916	0.564449	0.549757	0.502753
917	0.564689	0.549957	0.503
918	0.565023	0.550292	0.503385
919	0.565197	0.550512	0.50359
920	0.565453	0.550725	0.503809
921	0.565795	0.550944	0.504056
922	0.566078	0.551226	0.50436
923	0.566326	0.551507	0.504711
924	0.566565	0.551775	0.505069
925	0.566845	0.551992	0.505353
926	0.567153	0.552282	0.50557
927	0.567446	0.552584	0.505794
928	0.567688	0.55286	0.506072
929	0.567921	0.553152	0.506445
930	0.568176	0.553452	0.506773
931	0.568456	0.553751	0.507039
932	0.568709	0.553882	0.507292
933	0.568985	0.554133	0.507591
934	0.569275	0.554465	0.50792
935	0.569549	0.554809	0.508245
936	0.569775	0.554993	0.508462
937	0.569988	0.555174	0.508678
938	0.570209	0.555477	0.508982
939	0.570449	0.555754	0.5093
940	0.57064	0.555982	0.509577
941	0.570766	0.556148	0.509797
942	0.570971	0.556296	0.510069
943	0.571136	0.556446	0.510239
944	0.571281	0.556617	0.510381
945	0.571503	0.556906	0.510847
946	0.571656	0.557181	0.511146
947	0.571809	0.55744	0.511373
948	0.572039	0.557668	0.511589
949	0.57225	0.557889	0.511854
950	0.572482	0.558145	0.512203
951	0.572752	0.558452	0.512662
952	0.572812	0.558623	0.512827
953	0.572958	0.558757	0.513003
954	0.573188	0.558888	0.513223
955	0.573446	0.559223	0.513665
956	0.573669	0.559539	0.514028
957	0.573886	0.559808	0.514315
958	0.574136	0.559954	0.514478
959	0.574514	0.560259	0.514704
960	0.574823	0.560552	0.514967
961	0.574958	0.560753	0.515268
962	0.575197	0.560966	0.515582
963	0.57539	0.561151	0.515826
964	0.575511	0.561293	0.515989
965	0.575357	0.561215	0.516039
966	0.57527	0.561262	0.516244
967	0.575276	0.561395	0.516542
968	0.575489	0.561587	0.516854
969	0.575728	0.561828	0.517004
970	0.576028	0.562128	0.51721
971	0.576434	0.562514	0.517629
972	0.577187	0.563176	0.518183
973	0.578064	0.563782	0.518705
974	0.579034	0.564291	0.51917
975	0.579765	0.564826	0.519527
976	0.58036	0.565359	0.519938
977	0.580844	0.565856	0.520389
978	0.581215	0.566171	0.520859
979	0.581513	0.566383	0.521106
980	0.581826	0.566618	0.521331
981	0.582228	0.566988	0.521685
982	0.581136	0.565823	0.520629
983	0.581348	0.566107	0.520872
984	0.581512	0.566427	0.521104
985	0.581684	0.566708	0.521297
986	0.581948	0.566953	0.521468
987	0.582216	0.567204	0.521639
988	0.582412	0.567419	0.52183
989	0.582587	0.567644	0.521992
990	0.582708	0.567901	0.522107
991	0.582827	0.568122	0.522251
992	0.582994	0.568405	0.52247
993	0.583144	0.568735	0.522735
994	0.583271	0.568996	0.522943
995	0.583422	0.569168	0.523076
996	0.583574	0.569328	0.523198
997	0.583678	0.569496	0.523329
998	0.583737	0.569646	0.523443
999	0.583775	0.569773	0.523518
1000	0.583837	0.569922	0.523581
1001	0.583976	0.570092	0.523636
1002	0.584126	0.570253	0.523726
1003	0.584239	0.570411	0.523903
1004	0.584415	0.570574	0.524065
1005	0.584603	0.570731	0.52419
1006	0.584681	0.570864	0.524303
1007	0.584743	0.571004	0.524402
1008	0.584848	0.571108	0.52448
1009	0.584956	0.571135	0.524543
1010	0.585085	0.57115	0.524632
1011	0.585229	0.571206	0.52477
1012	0.585305	0.571251	0.524914
1013	0.585326	0.571252	0.52503
1014	0.585428	0.57131	0.525172
1015	0.585641	0.571479	0.525357
1016	0.585827	0.571564	0.525476
1017	0.585949	0.571587	0.525577
1018	0.586069	0.571671	0.525689
1019	0.586214	0.57173	0.525782
1020	0.586439	0.571806	0.525926
1021	0.586691	0.571919	0.526119
1022	0.586876	0.572016	0.526328
1023	0.586992	0.572085	0.526499
1024	0.587101	0.572147	0.5266
1025	0.58726	0.572228	0.526685
1026	0.58748	0.572357	0.526827
1027	0.587699	0.57251	0.527016
1028	0.587814	0.572586	0.527175
1029	0.587889	0.572615	0.527284
1030	0.587999	0.572658	0.527363
1031	0.588153	0.572692	0.52747
1032	0.588389	0.572775	0.527627
1033	0.588565	0.572901	0.527749
1034	0.588706	0.57301	0.527853
1035	0.588856	0.573141	0.527959
1036	0.588998	0.573291	0.528062
1037	0.589131	0.573435	0.528177
1038	0.589252	0.573557	0.528297
1039	0.589342	0.573638	0.528389
1040	0.589425	0.573706	0.528461
1041	0.589504	0.573793	0.528533
1042	0.589567	0.573904	0.528607
1043	0.589637	0.574071	0.528645
1044	0.589721	0.574226	0.528672
1045	0.589749	0.574305	0.528698
1046	0.58974	0.574378	0.528756
1047	0.589772	0.574481	0.528813
1048	0.589839	0.574611	0.528824
1049	0.589877	0.57471	0.528823
1050	0.589907	0.574754	0.528804
1051	0.589942	0.574809	0.528784
1052	0.58995	0.5749	0.528785
1053	0.589934	0.574985	0.528793
1054	0.58991	0.575022	0.528761
1055	0.589891	0.575037	0.528699
1056	0.589824	0.575027	0.52862
1057	0.589722	0.575005	0.528534
1058	0.589636	0.574982	0.528461
1059	0.589556	0.574975	0.528415
1060	0.589524	0.575024	0.528394
1061	0.589528	0.575101	0.528377
1062	0.589467	0.575096	0.528333
1063	0.589335	0.574973	0.528218
1064	0.589227	0.574873	0.528103
1065	0.589152	0.574822	0.528043
1066	0.589074	0.574774	0.527996
1067	0.589002	0.574738	0.527944
1068	0.588942	0.574706	0.527888
1069	0.588887	0.574643	0.527848
1070	0.588827	0.574564	0.527813
1071	0.588773	0.574475	0.527747
1072	0.588726	0.574386	0.527664
1073	0.588712	0.57436	0.527653
1074	0.588736	0.574363	0.527704
1075	0.588767	0.574309	0.527707
1076	0.588741	0.574182	0.527641
1077	0.588706	0.574071	0.527607
1078	0.588691	0.574005	0.527619
1079	0.588674	0.573909	0.527615
1080	0.588698	0.573787	0.527616
1081	0.588731	0.573679	0.527628
1082	0.58876	0.573576	0.527631
1083	0.588787	0.573471	0.527629
1084	0.58883	0.573415	0.527662
1085	0.588872	0.573371	0.527703
1086	0.58894	0.573325	0.527757
1087	0.589002	0.57327	0.527806
1088	0.58906	0.573179	0.527859
1089	0.589129	0.573084	0.527931
1090	0.589196	0.573009	0.527981
1091	0.589279	0.572968	0.52801
1092	0.589358	0.572939	0.528053
1093	0.589423	0.572928	0.528127
1094	0.589484	0.572904	0.528198
1095	0.589559	0.572831	0.528277
1096	0.589644	0.572768	0.528354
1097	0.589678	0.57274	0.528382
1098	0.589688	0.572712	0.5284
1099	0.589708	0.572691	0.528437
1100	0.589751	0.572678	0.528482
1101	0.589846	0.57265	0.528506
1102	0.589926	0.5726	0.528513
1103	0.589937	0.572597	0.528508
1104	0.589941	0.572631	0.52851
1105	0.58993	0.57264	0.528516
1106	0.5899	0.572615	0.528514
1107	0.589884	0.572581	0.528513
1108	0.589883	0.572564	0.528512
1109	0.589877	0.57257	0.5285
1110	0.589839	0.572613	0.528489
1111	0.589799	0.572649	0.528483
1112	0.589775	0.572677	0.528466
1113	0.589753	0.572708	0.528443
1114	0.589712	0.572737	0.528373
1115	0.589666	0.572758	0.528297
1116	0.589604	0.572743	0.528229
1117	0.589538	0.572725	0.528156
1118	0.58947	0.572734	0.528108
1119	0.58941	0.572758	0.528076
1120	0.589329	0.572778	0.527988
1121	0.589226	0.572786	0.527873
1122	0.589119	0.572782	0.527773
1123	0.589002	0.57278	0.527683
1124	0.588898	0.572785	0.527597
1125	0.588844	0.572805	0.52753
1126	0.588795	0.572812	0.527462
1127	0.588726	0.572783	0.527368
1128	0.588656	0.572761	0.527276
1129	0.588573	0.572764	0.527182
1130	0.588493	0.572767	0.52709
1131	0.588378	0.572734	0.52699
1132	0.588252	0.572693	0.526887
1133	0.58811	0.572645	0.526773
1134	0.587978	0.572602	0.526662
1135	0.587876	0.572555	0.526554
1136	0.587801	0.572521	0.526458
1137	0.587734	0.572482	0.526382
1138	0.587657	0.572427	0.526307
1139	0.587597	0.572371	0.526231
1140	0.587563	0.57232	0.526163
1141	0.587511	0.572262	0.526087
1142	0.58742	0.572181	0.52599
1143	0.587341	0.572099	0.525898
1144	0.587295	0.572027	0.525817
1145	0.587247	0.571958	0.525739
1146	0.587201	0.571878	0.525677
1147	0.587158	0.571798	0.525619
1148	0.587184	0.571777	0.525611
1149	0.587216	0.571768	0.525607
1150	0.587225	0.571715	0.52559
1151	0.587227	0.571651	0.52557
1152	0.587229	0.571609	0.525559
1153	0.587234	0.571579	0.525551
1154	0.587219	0.571526	0.525524
1155	0.587198	0.571452	0.525481
1156	0.58719	0.571389	0.525438
1157	0.587197	0.571346	0.525408
1158	0.587196	0.571293	0.525376
1159	0.58718	0.571219	0.525338
1160	0.587169	0.571146	0.525312
1161	0.587164	0.571074	0.525301
1162	0.587162	0.571014	0.525292
1163	0.587186	0.571015	0.525316
1164	0.587209	0.571014	0.525338
1165	0.587216	0.570967	0.52532
1166	0.587224	0.570919	0.525303
1167	0.587227	0.570907	0.525317
1168	0.58723	0.570898	0.525332
1169	0.587227	0.570843	0.525307
1170	0.587225	0.570776	0.525272
1171	0.587213	0.570715	0.525249
1172	0.58719	0.570652	0.525229
1173	0.58718	0.570628	0.525221
1174	0.587187	0.570643	0.525227
1175	0.587191	0.570645	0.525221
1176	0.587192	0.570638	0.525194
1177	0.587192	0.570632	0.525176
1178	0.587189	0.570615	0.525179
1179	0.58718	0.57059	0.525171
1180	0.587133	0.570539	0.525122
1181	0.587091	0.570491	0.525077
1182	0.587096	0.570467	0.525062
1183	0.587101	0.570444	0.525049
1184	0.587086	0.570408	0.52503
1185	0.587069	0.570372	0.525012
1186	0.587041	0.570366	0.524994
1187	0.587011	0.570366	0.524974
1188	0.586968	0.570332	0.524939
1189	0.586919	0.570285	0.524898
1190	0.586862	0.570253	0.524852
1191	0.5868	0.570232	0.524806
1192	0.586746	0.570213	0.524756
1193	0.586702	0.570199	0.524699
1194	0.586655	0.570172	0.524642
1195	0.586601	0.57012	0.524583
1196	0.586546	0.570065	0.524523
1197	0.586483	0.570005	0.524455
1198	0.586419	0.56995	0.524389
1199	0.586329	0.569916	0.524328
1200	0.586238	0.569881	0.524266
1201	0.586155	0.569819	0.524172
1202	0.586072	0.569757	0.52408
1203	0.586001	0.569716	0.524033
1204	0.585932	0.569676	0.523989
1205	0.585819	0.569602	0.523913
1206	0.585696	0.56952	0.52383
1207	0.585584	0.56943	0.523741
1208	0.585478	0.569335	0.523649
1209	0.585384	0.569271	0.523575
1210	0.585297	0.56923	0.523514
1211	0.58518	0.569144	0.523426
1212	0.585035	0.569011	0.523311
1213	0.584898	0.568894	0.523201
1214	0.584772	0.5688	0.523098
1215	0.584642	0.568699	0.522994
1216	0.584503	0.56858	0.522886
1217	0.584365	0.568464	0.522778
1218	0.584225	0.568359	0.522667
1219	0.584084	0.568251	0.522557
1220	0.583924	0.568112	0.52246
1221	0.583765	0.567974	0.522365
1222	0.583573	0.567845	0.522268
1223	0.583381	0.567718	0.522172
1224	0.583188	0.567578	0.522066
1225	0.582995	0.567437	0.521958
1226	0.582797	0.56728	0.521838
1227	0.582597	0.567119	0.521715
1228	0.582408	0.566964	0.521616
1229	0.582224	0.566814	0.521531
1230	0.582022	0.566668	0.521439
1231	0.581806	0.566525	0.521343
1232	0.581603	0.566371	0.521228
1233	0.581415	0.566205	0.521091
1234	0.581217	0.566046	0.520971
1235	0.581001	0.565902	0.520885
1236	0.580801	0.56576	0.5208
1237	0.580648	0.565626	0.520719
1238	0.580501	0.565494	0.520637
1239	0.580383	0.565371	0.520551
1240	0.58027	0.56525	0.520466
1241	0.580227	0.565179	0.520397
1242	0.580184	0.565108	0.520329
1243	0.580178	0.56506	0.520299
1244	0.580175	0.565014	0.52027
1245	0.58018	0.564979	0.520237
1246	0.580186	0.564946	0.520203
1247	0.580234	0.564934	0.520189
1248	0.580295	0.56493	0.520182
1249	0.580347	0.564889	0.520188
1250	0.580396	0.56483	0.520201
1251	0.580444	0.564794	0.520202
1252	0.580491	0.564778	0.520192
1253	0.580544	0.564762	0.520191
1254	0.580602	0.564749	0.520201
1255	0.58065	0.564738	0.520211
1256	0.580684	0.564733	0.520223
1257	0.580723	0.564729	0.520234
1258	0.58078	0.564726	0.520247
1259	0.580832	0.564723	0.52026
1260	0.580866	0.564716	0.520273
1261	0.5809	0.564711	0.520287
1262	0.580939	0.564727	0.52032
1263	0.580976	0.564743	0.520351
1264	0.581019	0.564746	0.520361
1265	0.581062	0.564749	0.520371
1266	0.581075	0.564734	0.52037
1267	0.581084	0.564718	0.520368
1268	0.581096	0.564727	0.520368
1269	0.581107	0.564741	0.520369
1270	0.581104	0.564746	0.520379
1271	0.581095	0.564749	0.520394
1272	0.581066	0.564736	0.520402
1273	0.581026	0.564713	0.520408
1274	0.580995	0.564709	0.520402
1275	0.580973	0.56472	0.520385
1276	0.580922	0.564705	0.52035
1277	0.580836	0.564658	0.520291
1278	0.580746	0.564618	0.520243
1279	0.580653	0.564589	0.520215
1280	0.580549	0.564554	0.520183
1281	0.580414	0.564503	0.520139
1282	0.58027	0.564442	0.520091
1283	0.580085	0.564335	0.520028
1284	0.579897	0.56423	0.519966
1285	0.579691	0.564145	0.519924
1286	0.579483	0.564059	0.519881
1287	0.57923	0.563937	0.51979
1288	0.578975	0.563814	0.519698
1289	0.578727	0.563678	0.519596
1290	0.578478	0.56354	0.519493
1291	0.578196	0.563396	0.519407
1292	0.577904	0.563249	0.519324
1293	0.577618	0.563107	0.519226
1294	0.577333	0.562965	0.519122
1295	0.577056	0.562797	0.519011
1296	0.576784	0.562617	0.518897
1297	0.576487	0.562413	0.518771
1298	0.576171	0.56219	0.518637
1299	0.575866	0.561981	0.518509
1300	0.575575	0.56179	0.51839
1301	0.575284	0.561593	0.518269
1302	0.574992	0.56139	0.518144
1303	0.574691	0.561183	0.518013
1304	0.574377	0.560969	0.517868
1305	0.574063	0.560756	0.517723
1306	0.573752	0.560548	0.517579
1307	0.573451	0.56035	0.517443
1308	0.573209	0.560207	0.517349
1309	0.572968	0.560062	0.517254
1310	0.572745	0.559909	0.517152
1311	0.572521	0.559756	0.51705
1312	0.572318	0.55961	0.516965
1313	0.572115	0.559465	0.51688
1314	0.571938	0.559359	0.516816
1315	0.571763	0.559257	0.516754
1316	0.571568	0.559127	0.516682
1317	0.571369	0.558992	0.516608
1318	0.571157	0.558844	0.516513
1319	0.570941	0.558693	0.516411
1320	0.570701	0.558517	0.516303
1321	0.570452	0.558331	0.516194
1322	0.57023	0.558168	0.516108
1323	0.570024	0.558019	0.516035
1324	0.569793	0.557851	0.515942
1325	0.569541	0.557668	0.515833
1326	0.569306	0.557491	0.515738
1327	0.569089	0.557322	0.515657
1328	0.56888	0.557167	0.515579
1329	0.568682	0.557037	0.515505
1330	0.56849	0.556903	0.515433
1331	0.568314	0.556759	0.515365
1332	0.568146	0.556615	0.515296
1333	0.568004	0.556472	0.515225
1334	0.567863	0.556331	0.515153
1335	0.567727	0.556197	0.515082
1336	0.567587	0.556065	0.515012
1337	0.567401	0.555945	0.514959
1338	0.567217	0.555826	0.514906
1339	0.567061	0.555682	0.514822
1340	0.566905	0.555537	0.514738
1341	0.566681	0.555341	0.514624
1342	0.566453	0.555143	0.514508
1343	0.566149	0.554889	0.514393
1344	0.565834	0.554627	0.514278
1345	0.565335	0.554281	0.514113
1346	0.564789	0.553915	0.513934
1347	0.564133	0.553487	0.513722
1348	0.563437	0.553038	0.513497
1349	0.562603	0.552518	0.513229
1350	0.561697	0.551962	0.51294
1351	0.560759	0.551398	0.512642
1352	0.5598	0.55083	0.512337
1353	0.558854	0.550257	0.512021
1354	0.557923	0.549682	0.511695
1355	0.557084	0.549167	0.511385
1356	0.556363	0.548727	0.511097
1357	0.555723	0.548327	0.510841
1358	0.555217	0.547991	0.510638
1359	0.554798	0.547712	0.510451
1360	0.554574	0.547558	0.510297
1361	0.554377	0.547416	0.510145
1362	0.554268	0.547311	0.509997
1363	0.554174	0.54721	0.509854
1364	0.554145	0.547131	0.509724
1365	0.554103	0.547041	0.509583
1366	0.553946	0.546837	0.509324
1367	0.553784	0.546629	0.509063
1368	0.553366	0.546194	0.508634
1369	0.552954	0.545765	0.508211
1370	0.552138	0.544994	0.507483
1371	0.551317	0.544219	0.506753
1372	0.550148	0.543164	0.505794
1373	0.548951	0.542087	0.504819
1374	0.547347	0.540687	0.503599
1375	0.545675	0.539235	0.50234
1376	0.543869	0.537719	0.501108
1377	0.542031	0.536191	0.499889
1378	0.540047	0.534639	0.498737
1379	0.53801	0.533083	0.497616
1380	0.535985	0.531658	0.496715
1381	0.533971	0.530307	0.495937
1382	0.531884	0.529021	0.495374
1383	0.529752	0.527786	0.494965
1384	0.527611	0.52664	0.494746
1385	0.525466	0.525577	0.4947
1386	0.523193	0.524486	0.49474
1387	0.520773	0.523365	0.494879
1388	0.518354	0.522243	0.495026
1389	0.515929	0.521118	0.495184
1390	0.51357	0.520014	0.495324
1391	0.511321	0.518942	0.495433
1392	0.509241	0.51794	0.495523
1393	0.507565	0.517102	0.495566
1394	0.506032	0.51632	0.495595
1395	0.504968	0.515727	0.495576
1396	0.504039	0.515198	0.495545
1397	0.503767	0.514977	0.495456
1398	0.503559	0.514785	0.495357
1399	0.503878	0.514815	0.495183
1400	0.50421	0.51485	0.495003
1401	0.504797	0.514943	0.494694
1402	0.505383	0.515036	0.494387
1403	0.505735	0.51473	0.493607
1404	0.506085	0.514422	0.492827
1405	0.505524	0.513306	0.491381
1406	0.504905	0.51214	0.489895
1407	0.503224	0.510088	0.487767
1408	0.501406	0.507922	0.485557
1409	0.499435	0.50571	0.483385
1410	0.497434	0.503489	0.481224
1411	0.495665	0.501485	0.47925
1412	0.493965	0.499545	0.477331
1413	0.49315	0.498442	0.476141
1414	0.492679	0.497663	0.475234
1415	0.494	0.498398	0.475488
1416	0.496217	0.499887	0.476321
1417	0.500029	0.502664	0.478079
1418	0.504845	0.506251	0.48042
1419	0.510473	0.510489	0.483227
1420	0.516739	0.515238	0.4864
1421	0.52297	0.519982	0.489599
1422	0.529172	0.524726	0.492826
1423	0.535224	0.529357	0.495965
1424	0.541102	0.533858	0.499001
1425	0.546296	0.537804	0.501647
1426	0.550498	0.540947	0.503726
1427	0.55418	0.543702	0.505555
1428	0.556929	0.54576	0.506935
1429	0.559356	0.547575	0.508154
1430	0.561056	0.548837	0.509007
1431	0.562633	0.550009	0.509793
1432	0.563848	0.55092	0.51038
1433	0.564987	0.551772	0.510925
1434	0.56583	0.552398	0.511311
1435	0.566638	0.552994	0.511678
1436	0.567255	0.553429	0.511947
1437	0.567856	0.553854	0.512208
1438	0.568311	0.554195	0.512394
1439	0.568761	0.554534	0.512578
1440	0.569116	0.554819	0.512727
1441	0.56947	0.555103	0.512875
1442	0.569726	0.55531	0.512974
1443	0.569984	0.555517	0.513073
1444	0.570173	0.555672	0.513159
1445	0.570362	0.555828	0.513246
1446	0.570511	0.55597	0.513301
1447	0.570657	0.556113	0.513353
1448	0.570793	0.556246	0.513403
1449	0.570929	0.556378	0.513452
1450	0.571079	0.556514	0.513513
1451	0.571233	0.556652	0.513577
1452	0.571361	0.556771	0.513617
1453	0.571483	0.556886	0.51365
1454	0.571636	0.557029	0.513709
1455	0.5718	0.557182	0.513776
1456	0.57192	0.557332	0.513849
1457	0.572024	0.55748	0.513924
1458	0.572149	0.557623	0.51399
1459	0.572283	0.557764	0.51405
1460	0.572388	0.557883	0.514099
1461	0.572476	0.557991	0.514142
1462	0.572568	0.558109	0.514185
1463	0.572663	0.558235	0.51423
1464	0.572766	0.558349	0.514283
1465	0.572872	0.558454	0.514343
1466	0.57298	0.558562	0.514406
1467	0.57309	0.558674	0.514471
1468	0.573197	0.558781	0.514526
1469	0.5733	0.558885	0.514569
1470	0.573399	0.558987	0.514617
1471	0.573492	0.559085	0.514672
1472	0.573605	0.5592	0.514741
1473	0.573748	0.559339	0.514833
1474	0.573876	0.559469	0.514908
1475	0.573977	0.559583	0.514954
1476	0.574086	0.559701	0.515018
1477	0.57421	0.559829	0.515121
1478	0.574324	0.559951	0.515211
1479	0.574418	0.560058	0.515267
1480	0.574513	0.560166	0.51533
1481	0.57461	0.560279	0.515406
1482	0.574706	0.56039	0.51548
1483	0.57479	0.560499	0.515546
1484	0.574878	0.560608	0.515608
1485	0.574985	0.560727	0.515657
1486	0.575094	0.560846	0.51571
1487	0.57521	0.560968	0.515782
1488	0.575324	0.561087	0.515852
1489	0.575414	0.56118	0.515904
1490	0.575506	0.561273	0.515956
1491	0.575601	0.561357	0.516031
1492	0.575695	0.561441	0.516106
1493	0.575785	0.561517	0.516165
1494	0.575874	0.561594	0.516224
1495	0.57596	0.561683	0.516298
1496	0.576046	0.561774	0.516372
1497	0.576142	0.561847	0.516428
1498	0.576239	0.561919	0.516483
1499	0.576338	0.562005	0.51657
1500	0.576439	0.562094	0.516661
1501	0.576543	0.562176	0.516726
1502	0.576648	0.562257	0.516791
1503	0.576734	0.562314	0.516854
1504	0.576817	0.562367	0.516915
1505	0.576926	0.56244	0.516971
1506	0.57704	0.562515	0.517028
1507	0.57717	0.562596	0.517123
1508	0.577304	0.562679	0.517225
1509	0.577428	0.562751	0.517326
1510	0.577551	0.562822	0.517425
1511	0.577667	0.562906	0.517512
1512	0.57778	0.562993	0.517595
1513	0.577911	0.563074	0.517695
1514	0.578047	0.563153	0.5178
1515	0.578177	0.563224	0.517892
1516	0.578307	0.563292	0.517981
1517	0.578423	0.563367	0.518082
1518	0.578533	0.563445	0.518189
1519	0.578663	0.563543	0.518292
1520	0.578803	0.563649	0.518393
1521	0.578944	0.563747	0.518498
1522	0.579086	0.563842	0.518608
1523	0.579215	0.563928	0.518715
1524	0.579337	0.564007	0.51882
1525	0.579457	0.564083	0.518916
1526	0.579578	0.564157	0.519009
1527	0.579707	0.564239	0.519112
1528	0.579841	0.564324	0.519225
1529	0.579978	0.56442	0.519332
1530	0.580113	0.564524	0.519432
1531	0.580239	0.564618	0.519532
1532	0.580359	0.564706	0.519632
1533	0.580473	0.564779	0.519751
1534	0.580579	0.564836	0.519885
1535	0.580694	0.564897	0.51999
1536	0.58082	0.564963	0.520066
1537	0.580957	0.565038	0.520155
1538	0.581102	0.565119	0.520258
1539	0.581229	0.565189	0.520345
1540	0.581335	0.565245	0.520416
1541	0.581441	0.565294	0.52049
1542	0.58155	0.565335	0.520566
1543	0.581651	0.565378	0.520633
1544	0.581738	0.565425	0.52069
1545	0.58181	0.565461	0.520737
1546	0.581856	0.565479	0.520766
1547	0.58192	0.565513	0.520808
1548	0.582016	0.565571	0.520876
1549	0.582108	0.565624	0.520938
1550	0.582189	0.565665	0.520987
1551	0.582273	0.565705	0.521036
1552	0.582361	0.565741	0.521083
1553	0.582433	0.56577	0.521125
1554	0.582484	0.565788	0.521158
1555	0.582548	0.565821	0.521201
1556	0.582628	0.565876	0.521263
1557	0.582702	0.565925	0.521317
1558	0.582765	0.565963	0.521359
1559	0.582827	0.566006	0.5214
1560	0.582883	0.566051	0.521437
1561	0.582934	0.56609	0.521471
1562	0.582978	0.566113	0.521506
1563	0.583036	0.566152	0.521554
1564	0.583127	0.566227	0.521633
1565	0.583208	0.566297	0.521701
1566	0.58326	0.56636	0.521739
1567	0.583316	0.566419	0.521785
1568	0.583385	0.566471	0.521845
1569	0.583446	0.566522	0.521899
1570	0.583481	0.566572	0.521941
1571	0.58352	0.566626	0.521983
1572	0.58357	0.566689	0.52202
1573	0.583621	0.566749	0.522055
1574	0.583678	0.566808	0.52209
1575	0.583743	0.566865	0.522123
1576	0.583834	0.566913	0.522149
1577	0.583921	0.566963	0.522176
1578	0.583988	0.567023	0.522205
1579	0.584053	0.567085	0.522231
1580	0.584103	0.567151	0.522241
1581	0.584151	0.567215	0.52225
1582	0.584198	0.567289	0.522274
1583	0.584245	0.567362	0.522296
1584	0.584281	0.567418	0.522299
1585	0.584316	0.567475	0.522304
1586	0.584347	0.567548	0.52232
1587	0.584375	0.567621	0.522333
1588	0.58437	0.56766	0.522325
1589	0.584366	0.567697	0.522317
1590	0.584378	0.567757	0.52232
1591	0.584394	0.567824	0.522328
1592	0.584442	0.567917	0.522366
1593	0.584489	0.568008	0.522402
1594	0.584506	0.568065	0.522409
1595	0.584521	0.568119	0.522416
1596	0.584544	0.568178	0.522431
1597	0.58457	0.568243	0.522447
1598	0.584593	0.568313	0.522447
1599	0.58461	0.568378	0.522443
1600	0.584625	0.568442	0.522445
1601	0.58464	0.568506	0.52245
1602	0.584653	0.568577	0.522465
1603	0.58467	0.56865	0.522479
1604	0.584663	0.568693	0.522467
1605	0.584651	0.568731	0.522451
1606	0.584632	0.568744	0.522437
1607	0.584615	0.568758	0.522427
1608	0.584613	0.568802	0.522414
1609	0.584604	0.56884	0.522393
1610	0.584547	0.56883	0.522326
1611	0.584499	0.568825	0.522266
1612	0.584496	0.568868	0.522262
1613	0.584491	0.568912	0.522256
1614	0.584495	0.568953	0.522237
1615	0.584497	0.568993	0.522219
1616	0.584492	0.569026	0.522216
1617	0.584491	0.569057	0.522212
1618	0.584502	0.569102	0.52221
1619	0.584507	0.569147	0.522206
1620	0.584476	0.569169	0.522189
1621	0.584443	0.56919	0.522172
1622	0.584394	0.569209	0.52216
1623	0.584353	0.569234	0.522148
1624	0.584373	0.569282	0.522147
1625	0.584389	0.569332	0.522144
1626	0.584384	0.569372	0.522127
1627	0.584382	0.56941	0.522112
1628	0.584392	0.569452	0.522102
1629	0.584402	0.569496	0.522094
1630	0.584409	0.569533	0.522094
1631	0.584413	0.569566	0.522089
1632	0.584403	0.569596	0.522063
1633	0.584392	0.569626	0.522045
1634	0.584396	0.569657	0.522064
1635	0.584401	0.569684	0.522079
1636	0.584391	0.569705	0.522074
1637	0.584381	0.56973	0.52207
1638	0.584383	0.569768	0.522073
1639	0.584386	0.569804	0.522073
1640	0.584388	0.569825	0.522071
1641	0.584401	0.569853	0.522073
1642	0.58446	0.569899	0.522103
1643	0.58451	0.569943	0.522136
1644	0.584521	0.569971	0.522167
1645	0.584531	0.569998	0.522194
1646	0.584539	0.570033	0.522213
1647	0.584546	0.57006	0.522228
1648	0.584574	0.570072	0.522232
1649	0.584603	0.570093	0.522241
1650	0.584614	0.570109	0.522269
1651	0.584633	0.570128	0.522298
1652	0.584674	0.570169	0.522331
1653	0.584718	0.570216	0.522368
1654	0.584783	0.570275	0.522409
1655	0.584846	0.570328	0.522442
1656	0.584897	0.570356	0.522453
1657	0.584948	0.570396	0.522477
1658	0.584995	0.570463	0.522536
1659	0.585035	0.570504	0.522588
1660	0.585053	0.570482	0.522617
1661	0.585074	0.570476	0.522641
1662	0.585108	0.57051	0.522653
1663	0.585155	0.570536	0.522669
1664	0.585221	0.570538	0.522695
1665	0.585277	0.57055	0.522734
1666	0.585317	0.570585	0.522797
1667	0.585363	0.570613	0.522858
1668	0.585422	0.570631	0.522911
1669	0.585482	0.570655	0.522962
1670	0.585547	0.57069	0.523017
1671	0.585613	0.570737	0.523061
1672	0.58568	0.570805	0.523094
1673	0.585752	0.570861	0.523145
1674	0.585832	0.570895	0.523223
1675	0.585905	0.570911	0.523288
1676	0.585959	0.570903	0.523333
1677	0.586017	0.570912	0.523384
1678	0.586084	0.570946	0.523446
1679	0.586154	0.570991	0.523497
1680	0.586223	0.571044	0.523529
1681	0.586282	0.571072	0.523553
1682	0.586325	0.571071	0.52357
1683	0.586373	0.571078	0.523609
1684	0.586434	0.571087	0.523675
1685	0.586501	0.571116	0.523736
1686	0.586571	0.571171	0.523796
1687	0.586646	0.571205	0.523843
1688	0.586722	0.571217	0.523875
1689	0.586787	0.571249	0.52392
1690	0.586846	0.571299	0.523975
1691	0.586905	0.571325	0.524016
1692	0.586962	0.571335	0.524052
1693	0.587013	0.571368	0.524069
1694	0.587059	0.571414	0.524071
1695	0.587123	0.571467	0.524115
1696	0.587197	0.571524	0.524183
1697	0.587222	0.571502	0.524208
1698	0.587228	0.571441	0.524211
1699	0.587251	0.571451	0.524256
1700	0.58728	0.571491	0.524323
1701	0.58733	0.571492	0.524365
1702	0.587386	0.571473	0.524395
1703	0.587433	0.57146	0.524421
1704	0.587482	0.571454	0.524448
1705	0.587553	0.571484	0.524509
1706	0.587629	0.571528	0.524585
1707	0.587685	0.571569	0.524654
1708	0.587735	0.571609	0.524718
1709	0.587784	0.571632	0.524731
1710	0.587832	0.571651	0.524732
1711	0.587864	0.571658	0.524742
1712	0.587893	0.571664	0.524753
1713	0.587922	0.571645	0.524765
1714	0.58795	0.571625	0.524778
1715	0.587965	0.571596	0.524771
1716	0.587978	0.571563	0.524758
1717	0.587945	0.571527	0.52475
1718	0.58791	0.571491	0.524745
1719	0.587855	0.571432	0.524728
1720	0.587795	0.57137	0.52471
1721	0.587772	0.571358	0.524673
1722	0.587748	0.571347	0.524632
1723	0.587743	0.571324	0.524611
1724	0.587739	0.571301	0.524592
1725	0.587717	0.57126	0.524583
1726	0.587692	0.571219	0.524573
1727	0.58764	0.571188	0.524539
1728	0.587584	0.571159	0.524502
1729	0.587507	0.57117	0.524459
1730	0.587433	0.571173	0.524421
1731	0.587378	0.571102	0.524392
1732	0.587322	0.571025	0.524351
1733	0.587253	0.57093	0.524254
1734	0.587176	0.570841	0.524163
1735	0.58708	0.570783	0.524111
1736	0.586987	0.570712	0.524042
1737	0.586902	0.570605	0.52392
1738	0.586829	0.570517	0.523827
1739	0.586793	0.570489	0.523823
1740	0.586738	0.570445	0.5238
1741	0.586636	0.570366	0.523731
1742	0.586546	0.57031	0.523663
1743	0.586478	0.570299	0.523599
1744	0.586387	0.570257	0.523514
1745	0.586258	0.570164	0.523396
1746	0.586136	0.570089	0.523286
1747	0.586023	0.57004	0.523189
1748	0.585913	0.569999	0.523116
1749	0.585806	0.569969	0.523074
1750	0.585702	0.569936	0.523004
1751	0.585601	0.569901	0.522907
1752	0.585512	0.569877	0.522847
1753	0.585436	0.569864	0.522818
1754	0.585352	0.569846	0.522782
1755	0.585263	0.569824	0.52274
1756	0.585167	0.569789	0.522673
1757	0.585064	0.569747	0.522591
1758	0.584956	0.569698	0.52253
1759	0.584845	0.569645	0.522479
1760	0.58473	0.569618	0.522435
1761	0.584615	0.569604	0.522394
1762	0.584497	0.569576	0.522312
1763	0.584375	0.569543	0.522213
1764	0.584268	0.569526	0.522184
1765	0.584164	0.569514	0.522173
1766	0.584051	0.569503	0.522129
1767	0.583934	0.569493	0.522078
1768	0.583767	0.569442	0.521968
1769	0.583589	0.569383	0.521846
1770	0.5834	0.569315	0.521755
1771	0.583209	0.569246	0.521666
1772	0.583047	0.569196	0.52159
1773	0.582886	0.569146	0.521512
1774	0.582704	0.569072	0.521388
1775	0.582519	0.568997	0.521264
1776	0.582321	0.568907	0.521179
1777	0.582123	0.568825	0.521097
1778	0.581923	0.568804	0.521022
1779	0.581724	0.568772	0.520939
1780	0.581558	0.568683	0.52084
1781	0.581384	0.568599	0.520761
1782	0.58206	0.568927	0.52101
1783	0.581899	0.568824	0.520976
1784	0.581729	0.568721	0.520922
1785	0.581573	0.568633	0.52088
1786	0.581452	0.568577	0.520872
1787	0.581351	0.568534	0.520872
1788	0.581245	0.568485	0.520862
1789	0.581108	0.568397	0.52083
1790	0.580978	0.568321	0.520804
1791	0.580848	0.568283	0.520785
1792	0.580723	0.568251	0.520757
1793	0.5806	0.568218	0.520711
1794	0.58048	0.568182	0.520672
1795	0.580464	0.568152	0.520694
1796	0.580485	0.568137	0.520715
1797	0.580501	0.568173	0.520752
1798	0.580512	0.56823	0.520818
1799	0.580524	0.568256	0.520894
1800	0.580515	0.568239	0.520959
1801	0.58051	0.568229	0.521033
1802	0.580539	0.568266	0.521142
1803	0.580577	0.568313	0.521261
1804	0.580681	0.568421	0.521449
1805	0.580796	0.568537	0.521648
1806	0.580926	0.568612	0.52183
1807	0.581052	0.568656	0.522006
1808	0.581106	0.568679	0.52214
1809	0.581115	0.568713	0.522261
1810	0.581138	0.568763	0.52239
1811	0.581195	0.568811	0.522523
1812	0.581252	0.568854	0.522649
1813	0.581271	0.568882	0.522759
1814	0.581288	0.568912	0.522868
1815	0.581329	0.568983	0.522979
1816	0.581379	0.569063	0.523086
1817	0.581454	0.569124	0.523177
1818	0.581534	0.569182	0.523257
1819	0.581622	0.569269	0.523346
1820	0.581722	0.569375	0.523449
1821	0.581847	0.56948	0.523548
1822	0.581996	0.569567	0.523636
1823	0.58214	0.569653	0.523724
1824	0.582313	0.569758	0.523808
1825	0.582489	0.569863	0.52389
1826	0.582627	0.569949	0.523939
1827	0.582756	0.570034	0.523976
1828	0.582909	0.570136	0.524052
1829	0.583084	0.570246	0.524146
1830	0.583248	0.570353	0.524253
1831	0.583382	0.570439	0.524374
1832	0.583491	0.570511	0.524488
1833	0.583596	0.570582	0.524599
1834	0.583695	0.570652	0.524708
1835	0.58373	0.570728	0.524807
1836	0.583761	0.570806	0.524906
1837	0.583875	0.570878	0.525011
1838	0.584003	0.570944	0.525112
1839	0.584114	0.571027	0.525219
1840	0.584207	0.571099	0.525336
1841	0.584326	0.57118	0.525453
1842	0.584467	0.571279	0.525549
1843	0.584625	0.571392	0.525649
1844	0.584835	0.57154	0.525811
1845	0.585054	0.571688	0.525978
1846	0.585305	0.571838	0.526116
1847	0.585552	0.571984	0.526241
1848	0.585781	0.572107	0.526338
1849	0.586023	0.572237	0.526453
1850	0.586273	0.572369	0.526585
1851	0.586521	0.572499	0.526696
1852	0.58677	0.572636	0.526821
1853	0.587045	0.572798	0.526979
1854	0.587282	0.572935	0.527107
1855	0.587407	0.572988	0.527182
1856	0.587528	0.573041	0.527256
1857	0.587624	0.573073	0.527285
1858	0.587714	0.5731	0.527308
1859	0.587748	0.573094	0.527337
1860	0.587779	0.573086	0.527372
1861	0.587818	0.573077	0.527398
1862	0.587857	0.573071	0.527417
1863	0.587851	0.573056	0.527412
1864	0.587791	0.573022	0.527386
1865	0.587738	0.572977	0.527354
1866	0.587682	0.572928	0.527313
1867	0.587608	0.572871	0.527267
1868	0.58747	0.572757	0.527226
1869	0.58733	0.572639	0.527186
1870	0.587177	0.572484	0.527073
1871	0.587019	0.572327	0.52694
1872	0.586838	0.572157	0.526827
1873	0.586656	0.571978	0.526732
1874	0.586468	0.571782	0.526633
1875	0.586265	0.571586	0.526529
1876	0.586049	0.571381	0.526421
1877	0.585797	0.571138	0.526308
1878	0.58552	0.570875	0.526167
1879	0.585193	0.570552	0.525942
1880	0.584869	0.570226	0.52572
1881	0.584542	0.569861	0.525489
1882	0.584213	0.569491	0.525257
1883	0.583806	0.569094	0.524993
1884	0.583385	0.568694	0.52472
1885	0.582933	0.568273	0.524414
1886	0.582464	0.567836	0.524086
1887	0.58199	0.56739	0.523741
1888	0.581493	0.566916	0.523379
1889	0.580983	0.566444	0.523023
1890	0.580423	0.565966	0.52267
1891	0.579854	0.565476	0.522306
1892	0.579238	0.564904	0.521871
1893	0.578619	0.564328	0.521431
1894	0.577973	0.563767	0.520948
1895	0.57732	0.563213	0.520461
1896	0.576643	0.562635	0.519983
1897	0.57595	0.562037	0.519496
1898	0.575251	0.561442	0.519008
1899	0.574525	0.560846	0.518506
1900	0.573812	0.560251	0.518
1901	0.573142	0.559668	0.517519
1902	0.57248	0.559095	0.51705
1903	0.571811	0.558529	0.516603
1904	0.571145	0.557965	0.516156
1905	0.570526	0.557423	0.51571
1906	0.569914	0.556883	0.515261
1907	0.569374	0.556396	0.514871
1908	0.568853	0.555926	0.514502
1909	0.568356	0.555471	0.514131
1910	0.567866	0.555021	0.513753
1911	0.567394	0.554601	0.513408
1912	0.566955	0.554222	0.513117
1913	0.566537	0.553864	0.512838
1914	0.566183	0.553554	0.512581
1915	0.565837	0.553249	0.512327
1916	0.565517	0.552991	0.512087
1917	0.565197	0.552735	0.511849
1918	0.564899	0.552516	0.511665
1919	0.564609	0.552299	0.511486
1920	0.56436	0.552084	0.511319
1921	0.564126	0.55188	0.511157
1922	0.563907	0.551714	0.511035
1923	0.563706	0.551569	0.510943
1924	0.563512	0.551413	0.510837
1925	0.563333	0.551245	0.510708
1926	0.563162	0.551089	0.510587
1927	0.563009	0.550979	0.510507
1928	0.562858	0.55087	0.510431
1929	0.562714	0.550753	0.510378
1930	0.562569	0.550635	0.510325
1931	0.562459	0.550559	0.510302
1932	0.562358	0.550495	0.510286
1933	0.562272	0.55045	0.510275
1934	0.562178	0.550399	0.51026
1935	0.562088	0.550347	0.510249
1936	0.56201	0.550303	0.510247
1937	0.561945	0.550273	0.510248
1938	0.561897	0.550265	0.510251
1939	0.561862	0.550264	0.510255
1940	0.561888	0.550275	0.51028
1941	0.561911	0.550286	0.510308
1942	0.561965	0.550348	0.510381
1943	0.562022	0.550413	0.510455
1944	0.562089	0.550476	0.510536
1945	0.562156	0.550538	0.510617
1946	0.562236	0.550632	0.510705
1947	0.562321	0.550736	0.510798
1948	0.562412	0.550825	0.510881
1949	0.562506	0.550899	0.510952
1950	0.562623	0.55101	0.51105
1951	0.562782	0.551171	0.511199
1952	0.56294	0.551326	0.511347
1953	0.563094	0.551487	0.511482
1954	0.563253	0.551654	0.511618
1955	0.563456	0.551855	0.511788
1956	0.56366	0.552056	0.511959
1957	0.563823	0.552222	0.512094
1958	0.563981	0.552386	0.512223
1959	0.564161	0.552577	0.512399
1960	0.564345	0.552775	0.512588
1961	0.564546	0.552972	0.512781
1962	0.564769	0.553176	0.512987
1963	0.56498	0.553375	0.51319
1964	0.565171	0.553566	0.513378
1965	0.56536	0.553758	0.513566
1966	0.565536	0.553943	0.51376
1967	0.565715	0.55413	0.513955
1968	0.565929	0.554375	0.514159
1969	0.566144	0.554619	0.514363
1970	0.56634	0.554801	0.51454
1971	0.566536	0.55498	0.514715
1972	0.566781	0.5552	0.514925
1973	0.567036	0.555429	0.515143
1974	0.567278	0.555686	0.515373
1975	0.567517	0.555964	0.515613
1976	0.56777	0.556241	0.515864
1977	0.568036	0.556516	0.516124
1978	0.568296	0.556801	0.516387
1979	0.568551	0.557111	0.516661
1980	0.568811	0.557419	0.516935
1981	0.569073	0.557694	0.517193
1982	0.569333	0.557968	0.51745
1983	0.569582	0.558233	0.517671
1984	0.569833	0.5585	0.517893
1985	0.570079	0.558754	0.518127
1986	0.570322	0.559007	0.518364
1987	0.57053	0.559276	0.518595
1988	0.570725	0.559553	0.518824
1989	0.570946	0.55983	0.519069
1990	0.571183	0.560105	0.519323
1991	0.571431	0.560374	0.519591
1992	0.571695	0.560634	0.519884
1993	0.57195	0.560902	0.520175
1994	0.572181	0.561187	0.520461
1995	0.572413	0.561472	0.520748
1996	0.572659	0.561762	0.521042
1997	0.572905	0.562053	0.521337
1998	0.573155	0.562342	0.521632
1999	0.573406	0.562632	0.521927
2000	0.573635	0.562945	0.522232
2001	0.57386	0.563265	0.522543
2002	0.574082	0.563571	0.522819
2003	0.574303	0.563869	0.523076
2004	0.574538	0.564161	0.523356
2005	0.574787	0.564448	0.523656
2006	0.575037	0.564735	0.523947
2007	0.575288	0.565025	0.524222
2008	0.57554	0.565316	0.524503
2009	0.575786	0.565605	0.524802
2010	0.576035	0.565896	0.525102
2011	0.576299	0.566206	0.525412
2012	0.576563	0.566516	0.525723
2013	0.576758	0.566794	0.525996
2014	0.57695	0.567071	0.526266
2015	0.57718	0.567339	0.526551
2016	0.577422	0.567607	0.526839
2017	0.577633	0.567863	0.527114
2018	0.577828	0.568115	0.527382
2019	0.578031	0.568376	0.527647
2020	0.578242	0.568649	0.527908
2021	0.578456	0.568919	0.528174
2022	0.578677	0.569185	0.528446
2023	0.578889	0.569451	0.528719
2024	0.579069	0.569717	0.528996
2025	0.579252	0.569981	0.529272
2026	0.579447	0.570218	0.529543
2027	0.579643	0.570457	0.529815
2028	0.579839	0.570705	0.530054
2029	0.580035	0.570955	0.530292
2030	0.580186	0.57116	0.530538
2031	0.580328	0.571356	0.530786
2032	0.580474	0.571537	0.531009
2033	0.580621	0.571712	0.531221
2034	0.580744	0.571892	0.531432
2035	0.580849	0.572077	0.531643
2036	0.580958	0.572259	0.531849
2037	0.581071	0.572438	0.532049
2038	0.581191	0.572611	0.532252
2039	0.581325	0.57277	0.532457
2040	0.581451	0.572925	0.532652
2041	0.581537	0.57306	0.532796
2042	0.581624	0.573193	0.532941
2043	0.581682	0.573312	0.533116
2044	0.58174	0.573431	0.533291
2045	0.581785	0.573556	0.533447
2046	0.581828	0.573681	0.533601
2047	0.581852	0.573769	0.533767
2048	0.58187	0.573843	0.533936
2049	0.581869	0.573885	0.534046
2050	0.581859	0.573911	0.534122
2051	0.581853	0.573948	0.534215
2052	0.581853	0.574	0.534325
2053	0.58185	0.574043	0.534431
2054	0.581841	0.574067	0.534528
2055	0.581811	0.574081	0.534612
2056	0.581721	0.574066	0.534656
2057	0.581629	0.57405	0.534702
2058	0.58152	0.57403	0.534764
2059	0.58141	0.574009	0.534828
2060	0.581287	0.573954	0.534892
2061	0.581164	0.573897	0.534956
2062	0.580985	0.573833	0.535005
2063	0.580799	0.57377	0.535053
2064	0.580622	0.573712	0.535118
2065	0.580447	0.573656	0.535188
2066	0.580253	0.573573	0.53525
2067	0.580049	0.573473	0.535307
2068	0.579825	0.573371	0.535361
2069	0.579585	0.573268	0.535416
2070	0.579334	0.573159	0.535461
2071	0.57907	0.573048	0.535495
2072	0.578806	0.572935	0.53553
2073	0.578537	0.572807	0.53556
2074	0.578272	0.572678	0.535583
2075	0.578033	0.572547	0.53558
2076	0.577793	0.572415	0.535577
2077	0.577546	0.572282	0.535592
2078	0.577298	0.572148	0.535607
2079	0.576993	0.571998	0.535596
2080	0.576678	0.571845	0.535579
2081	0.576361	0.571667	0.535562
2082	0.576048	0.571484	0.535546
2083	0.575733	0.57129	0.53552
2084	0.575419	0.57109	0.53549
2085	0.575127	0.570919	0.535485
2086	0.574855	0.570772	0.535502
2087	0.574604	0.570636	0.535514
2088	0.574383	0.57052	0.535519
2089	0.574173	0.570412	0.53553
2090	0.573995	0.570319	0.535556
2091	0.573836	0.570238	0.535592
2092	0.57373	0.570193	0.535656
2093	0.573627	0.570147	0.535716
2094	0.573527	0.570085	0.535728
2095	0.573429	0.570024	0.535741
2096	0.573376	0.569966	0.535759
2097	0.573323	0.569906	0.535777
2098	0.573126	0.569789	0.535759
2099	0.572903	0.569662	0.535736
2100	0.572647	0.569471	0.535733
2101	0.572376	0.569255	0.535737
2102	0.572032	0.569004	0.535694
2103	0.571638	0.568732	0.53562
2104	0.571151	0.568409	0.535525
2105	0.570604	0.56805	0.535415
2106	0.570002	0.567652	0.535273
2107	0.569349	0.567222	0.535103
2108	0.568691	0.566783	0.53495
2109	0.568055	0.566344	0.534837
2110	0.567421	0.565929	0.534734
2111	0.566837	0.565628	0.534687
2112	0.566274	0.565337	0.534645
2113	0.56588	0.565133	0.534637
2114	0.565489	0.564934	0.534635
2115	0.565188	0.564825	0.534727
2116	0.564888	0.564717	0.534822
2117	0.564732	0.564672	0.534962
2118	0.564581	0.564627	0.535105
2119	0.564462	0.564614	0.53525
2120	0.564335	0.564596	0.535379
2121	0.564163	0.564523	0.535444
2122	0.563964	0.564421	0.535481
2123	0.563665	0.56424	0.535466
2124	0.563278	0.564	0.535409
2125	0.562839	0.563704	0.535291
2126	0.562344	0.563346	0.535113
2127	0.561723	0.562894	0.534879
2128	0.560919	0.562308	0.534563
2129	0.560041	0.561654	0.534196
2130	0.559006	0.560873	0.533736
2131	0.557898	0.560042	0.533234
2132	0.556493	0.558993	0.532557
2133	0.55506	0.557918	0.531872
2134	0.553463	0.556707	0.531158
2135	0.551838	0.555476	0.53043
2136	0.549739	0.553957	0.529529
2137	0.547607	0.552419	0.528618
2138	0.545284	0.550744	0.52762
2139	0.542936	0.549045	0.52661
2140	0.540199	0.547032	0.525468
2141	0.537376	0.544954	0.5243
2142	0.53437	0.542799	0.523099
2143	0.531301	0.540617	0.521887
2144	0.527957	0.538204	0.52054
2145	0.524465	0.535664	0.519109
2146	0.520967	0.53312	0.517697
2147	0.517486	0.530586	0.516298
2148	0.513933	0.527966	0.514837
2149	0.510338	0.525262	0.513311
2150	0.506799	0.522576	0.511763
2151	0.503417	0.51995	0.510169
2152	0.500015	0.517295	0.50853
2153	0.496627	0.514612	0.506784
2154	0.493296	0.511947	0.505019
2155	0.49031	0.509432	0.503184
2156	0.487337	0.506911	0.501323
2157	0.484669	0.504471	0.499356
2158	0.482013	0.502035	0.497381
2159	0.479761	0.499872	0.495419
2160	0.477523	0.497717	0.493452
2161	0.475536	0.495618	0.491366
2162	0.473568	0.49352	0.489264
2163	0.47205	0.491733	0.487307
2164	0.470613	0.490003	0.485387
2165	0.469369	0.488408	0.483485
2166	0.468179	0.486856	0.481596
2167	0.467264	0.485509	0.479887
2168	0.466483	0.484269	0.478278
2169	0.465802	0.483112	0.476726
2170	0.465174	0.482003	0.475213
2171	0.464653	0.481009	0.47382
2172	0.464222	0.480124	0.47255
2173	0.463814	0.479303	0.471339
2174	0.463444	0.478584	0.47023
2175	0.463114	0.477922	0.469221
2176	0.462828	0.477365	0.468426
2177	0.462543	0.476837	0.467685
2178	0.462266	0.476413	0.467137
2179	0.462	0.476018	0.46664
2180	0.461755	0.475739	0.466395
2181	0.461514	0.475476	0.466187
2182	0.461197	0.475355	0.466272
2183	0.460875	0.475241	0.466379
2184	0.460477	0.475128	0.466663
2185	0.46007	0.475012	0.466956
2186	0.459526	0.474896	0.467358
2187	0.458961	0.474766	0.467756
2188	0.458273	0.47452	0.468087
2189	0.457563	0.474241	0.468382
2190	0.456625	0.473748	0.468502
2191	0.455602	0.473168	0.468539
2192	0.454373	0.472333	0.468276
2193	0.453029	0.471361	0.467846
2194	0.451331	0.470005	0.466996
2195	0.449355	0.468354	0.465856
2196	0.446974	0.466286	0.464259
2197	0.444245	0.463877	0.462304
2198	0.441095	0.46105	0.459972
2199	0.437513	0.457817	0.457291
2200	0.433712	0.454366	0.454431
2201	0.4298	0.450794	0.451489
2202	0.425773	0.44713	0.448479
2203	0.421894	0.443642	0.44564
2204	0.418239	0.440356	0.442996
2205	0.415696	0.438068	0.441188
2206	0.413467	0.436079	0.439613
2207	0.413026	0.4357	0.439284
2208	0.412925	0.435625	0.43919
2209	0.415038	0.437419	0.440514
2210	0.417443	0.439463	0.442029
2211	0.42214	0.443424	0.44488
2212	0.42704	0.447552	0.447855
2213	0.433259	0.452724	0.451606
2214	0.439543	0.457945	0.45539
2215	0.446662	0.463794	0.459537
2216	0.453769	0.469624	0.463662
2217	0.460467	0.475106	0.467435
2218	0.467014	0.480464	0.471112
2219	0.473099	0.485418	0.474516
2220	0.479029	0.490253	0.477848
2221	0.483837	0.494164	0.480547
2222	0.488299	0.497786	0.48306
2223	0.491997	0.500814	0.485168
2224	0.495393	0.503614	0.48712
2225	0.498122	0.505916	0.488789
2226	0.500505	0.507964	0.490306
2227	0.502523	0.509715	0.491614
2228	0.504289	0.511264	0.49278
2229	0.505754	0.512571	0.493802
2230	0.506964	0.513656	0.494688
2231	0.507963	0.514551	0.495444
2232	0.508735	0.515244	0.496051
2233	0.509376	0.515865	0.496594
2234	0.509826	0.516379	0.497052
2235	0.510182	0.516811	0.497453
2236	0.510381	0.517105	0.497746
2237	0.510519	0.517339	0.497999
2238	0.51052	0.517439	0.498145
2239	0.510503	0.517526	0.498268
2240	0.510432	0.517545	0.498309
2241	0.510345	0.517547	0.49833
2242	0.510222	0.517516	0.498279
2243	0.510096	0.51749	0.498224
2244	0.509964	0.517453	0.498142
2245	0.509835	0.517409	0.498061
2246	0.509705	0.517337	0.498007
2247	0.509571	0.517259	0.497949
2248	0.509453	0.517129	0.497837
[truncated: 252 more rows]

## Sheet: Table S10
Table S10. VNIR-SWIR reflectance spectra corresponding to mechanic mixtures of kaolinite-magnesiofoitite (T) reference minerals from the Athabasca Basin Mineral Standards database
[truncated: 2,152 more rows]

[truncated: 2 more sheets: Table S11, Table S12]
